# Supplementary material
Source: PubMed Central journal article supplement (PMC5846573)
Supplement: NIHMS948111-supplement-Appendix.pdf [file NIHMS948111-supplement-Appendix.pdf]

Appendix Figure 1. Growth in cost-utility analyses over time.

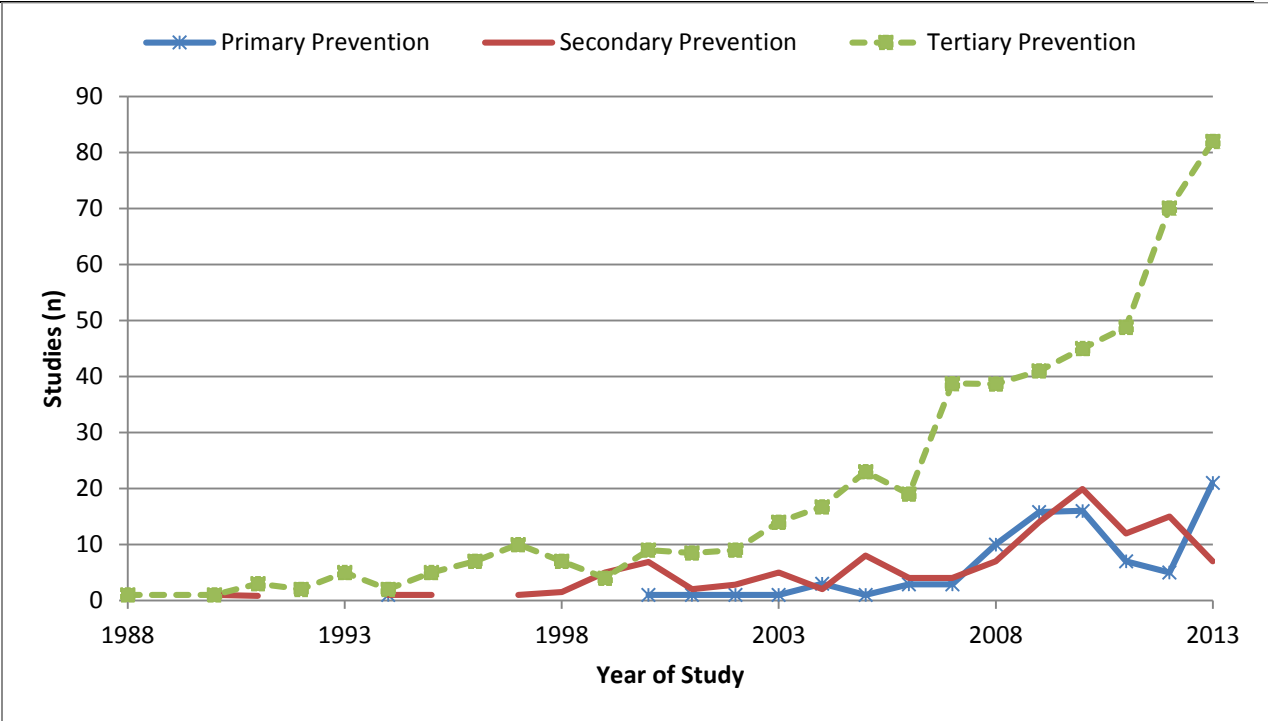

**Appendix Table 1.** Number of Studies and Incremental Cost-Effectiveness Ratios (ICERs) (\$US2014) for Screening Studies by Cancer Types<sup>a</sup>

| <b>Cancer type</b>                     | <b>N</b> | <b>Median ICER</b> |
|----------------------------------------|----------|--------------------|
| Overall                                | 118      | 32000              |
| Breast                                 | 32       | 22000              |
| Colorectal                             | 20       | 15000              |
| Cervix                                 | 22       | 28000              |
| Prostate                               | 4        | 98000              |
| Lung                                   | 7        | 30000              |
| Melanoma                               | 3        | 46000              |
| Gastrointestinal and<br>hepatocellular | 14       | 40000              |
| Ovarian                                | 2        | 9500               |
| Kidney                                 | 2        | 68000              |
| Head & Neck                            | 3        | Cost-Saving        |
| Stomach                                | 1        | 35000              |
| Other                                  | 8        | 51000              |

<sup>a</sup>In each study, the estimated incremental cost-utility ratio was compared with the status quo (i.e., a less effective screening technique, etc).

Appendix Table: Table of the incremental cost-effectiveness ratios by cancer site

**Contents**

|                                                  |     |
|--------------------------------------------------|-----|
| Bladder Cancer .....                             | 4   |
| Brain Cancer .....                               | 5   |
| Breast Cancer .....                              | 7   |
| Cervical Cancer .....                            | 83  |
| Colorectal Cancer .....                          | 112 |
| Esophageal Cancer .....                          | 143 |
| Gastrointestinal and Hepatocellular Cancer ..... | 144 |
| Hematologic Cancers.....                         | 159 |
| Kidney Cancer .....                              | 172 |
| Lung Cancer .....                                | 176 |
| Melanoma .....                                   | 196 |
| Neck Cancer .....                                | 200 |
| Other Cancers.....                               | 206 |
| Ovarian Cancer.....                              | 222 |
| Pancreatic Cancer .....                          | 226 |
| Prostate Cancer .....                            | 229 |
| Stomach Cancer .....                             | 248 |
| Uterine Cancer.....                              | 248 |
| Citations.....                                   | 250 |

## Bladder Cancer

| Description                                                                                                                                                                                                                                                                                                                                                                                                            | Original US\$/QALY | 2014US\$/QALY | Reference                 |
|------------------------------------------------------------------------------------------------------------------------------------------------------------------------------------------------------------------------------------------------------------------------------------------------------------------------------------------------------------------------------------------------------------------------|--------------------|---------------|---------------------------|
| Gemcitabine, cisplatin (GC) 28-day cycle- Gemcitabine (1000 mg/m <sup>2</sup> ) and cisplatin (70 mg/m <sup>2</sup> ) VERSUS Methotrexate, vinblastine, doxorubicin, cisplatin (MVAC) 28-day cycle- Methotrexate (30 mg/m <sup>2</sup> ), vinblastine (3 mg/m <sup>2</sup> ), doxorubicin (30 mg/m <sup>2</sup> ), cisplatin (70 mg/m <sup>2</sup> ) IN UK patients with locally advanced or metastatic bladder cancer | 33003              | 44000         | Robinson et al., 2004 (1) |
| Immediate radical cystectomy VERSUS Intravesicle Bacillus Calmette-Guerin (BCG) IN Patients aged 60 years old with high-risk, high-grade (T1G3) bladder cancer                                                                                                                                                                                                                                                         | -56636             | Cost-Saving   | Kulkarni et al., 2009 (2) |
| Perioperative intravesical chemotherapy (PIC) + fulguration VERSUS Perioperative intravesical chemotherapy (PIC) + transurethral resection of bladder tumor (TURBT) IN Patients with low-risk bladder urothelial carcinoma not invading bladder muscle                                                                                                                                                                 | -46720             | Cost-Saving   | Green et al., 2012 (3)    |
| Perioperative intravesical chemotherapy (PIC) + fulguration VERSUS None IN Patients with low-risk bladder urothelial carcinoma not invading bladder muscle                                                                                                                                                                                                                                                             | 4169               | 4500          | Green et al., 2012 (3)    |
| Perioperative intravesical chemotherapy (PIC) + fulguration VERSUS Transurethral resection of bladder tumor (TURBT) IN Patients with low-risk bladder urothelial carcinoma not invading bladder muscle                                                                                                                                                                                                                 | -4176              | Cost-Saving   | Green et al., 2012 (3)    |
| Adjuvant perioperative intravesical chemotherapy VERSUS Usual care (resection only) IN US patients initially diagnosed with nonmuscle invasive bladder cancer who have received transurethral resection of bladder tumor and are untreated with perioperative intravesical chemotherapy                                                                                                                                | -24750             | Cost-Saving   | Lee et al., 2012 (4)      |
| Outpatient (office-based) laser ablation VERSUS Inpatient cystodiathermy (IC). IN Specific disease- non-muscle-invasive bladder cancer (NMIBC); Age- Adult; Gender- Both; Country- United Kingdom.                                                                                                                                                                                                                     | -33775             | Cost-Saving   | Wong et al., 2013 (5)     |

## Brain Cancer

| Description                                                                                                                                                                                                                                              | Original<br>US\$/QALY | 2014US\$/QALY                              | Reference                  |
|----------------------------------------------------------------------------------------------------------------------------------------------------------------------------------------------------------------------------------------------------------|-----------------------|--------------------------------------------|----------------------------|
| Surgical resection with postoperative radiotherapy (RT) VERSUS Radiosurgery (RS) with radiotherapy IN Patients with single brain metastases treated with whole-brain irradiation and resection or radiosurgery                                           | -23053                | Increases<br>Costs,<br>Decreases<br>Health | Mehta et al., 1997 (6)     |
| Magnetic resonance imaging (MRI) VERSUS No neuroimaging with close clinical follow up IN Children with headache suspected of having a brain tumor - low risk patients                                                                                    |                       | Increases<br>Costs,<br>Decreases<br>Health | Medina et al., 2001 (7)    |
| Computed tomography followed by magnetic resonance imaging (MRI) for positive results VERSUS No neuroimaging with close clinical follow up IN Children with headache suspected of having a brain tumor - low risk patients                               |                       | Increases<br>Costs,<br>Decreases<br>Health | Medina et al., 2001 (7)    |
| Computed tomography followed by magnetic resonance imaging (MRI) for positive results VERSUS No neuroimaging with close clinical follow up IN Children with headache suspected of having a brain tumor - Intermediate risk patients                      | 1600000               | 2400000                                    | Medina et al., 2001 (7)    |
| Magnetic resonance imaging (MRI) VERSUS No neuroimaging with close clinical follow up IN Children with headache suspected of having a brain tumor - high risk patients                                                                                   | 113800                | 170000                                     | Medina et al., 2001 (7)    |
| Computed tomography followed by magnetic resonance imaging (MRI) for positive results VERSUS No neuroimaging with close clinical follow up IN Children with headache suspected of having a brain tumor - high risk patients                              | 1600000               | 2400000                                    | Medina et al., 2001 (7)    |
| Placement of an intra-vena-caval bird's nest filter (BNF) with anti-coagulation therapy VERSUS Anti-coagulation therapy alone IN Patients with malignant brain tumors and deep venous thrombosis of the lower extremities at risk for pulmonary embolism | 277200                | 390000                                     | Chau et al., 2003 (8)      |
| Proton radiation therapy with surgery and chemotherapy VERSUS Conventional radiation therapy with surgery and chemotherapy IN Children with medulloblastoma - age 5                                                                                      | -32730                | Cost-Saving                                | Lundkvist et al., 2005 (9) |

**Appendix**  
**Cost-Utility Analysis of Cancer Prevention, Treatment, and Control: A Systematic Review**  
**Winn et al.**

|                                                                                                                                                                                                                                                                     |       |        |                               |
|---------------------------------------------------------------------------------------------------------------------------------------------------------------------------------------------------------------------------------------------------------------------|-------|--------|-------------------------------|
| Second line temozolomide VERSUS Chemotherapy with procarbazine, lomustine, and vincristine IN Patients with glioblastoma multiforme that had relapsed after primary treatment with surgery and radiotherapy                                                         | 29068 | 39000  | Martikainen et al., 2005 (10) |
| Intracranial implantation of carmustine wafers (BCNU-W) as an adjunct to surgery followed by radiotherapy VERSUS Surgery plus radiotherapy IN Patients in the United Kingdom mean age 55 years with high grade gliomas                                              | 99898 | 130000 | Rogers et al., 2008 (11)      |
| Whole brain radiotherapy for treatment of brain tumors VERSUS No treatment IN Taiwanese patients 18 to 80 years old with multiple metastatic brain tumors and a pre-operative Karnofsky performance scale (KPS) score of 50 to 100.                                 | 17622 | 20000  | Lee et al., 2009 (12)         |
| Gamma knife radiosurgery for treatment of brain tumors VERSUS No treatment IN Taiwanese patients 18 to 80 years old with multiple metastatic brain tumors and a pre-operative Karnofsky performance scale (KPS) score of 50 to 100.                                 | 10831 | 12000  | Lee et al., 2009 (12)         |
| Stereotactic radiosurgery (SRS) and observation VERSUS Stereotactic radiosurgery (SRS) and brain radiation therapy (WBRT) IN Patients newly diagnosed with 1 to 3 brain metastases                                                                                  | 41783 | 48000  | Lal et al., 2011 (13)         |
| Nitrosourea and radiotherapy (NT + RT) VERSUS Radiotherapy (RT) IN Glioblastoma patients in China                                                                                                                                                                   | 39185 | 43000  | Wu et al., 2012 (14)          |
| Temozolomide and radiotherapy (TMZ + RT) VERSUS Radiotherapy IN Glioblastoma patients in China                                                                                                                                                                      | 87941 | 97000  | Wu et al., 2012 (14)          |
| Intraoperative electrical stimulation (IES) mapping for resection with an asleep-awake-asleep technique VERSUS None IN Specific disease- WHO grade II gliomas within eloquent areas; Age- 19 to 40 years, 41 to 64 years, >=65 years; Gender- Both; Country- Spain. | 10271 | 11000  | Martino et al., 2013 (15)     |

**Appendix**  
**Cost-Utility Analysis of Cancer Prevention, Treatment, and Control: A Systematic Review**  
**Winn et al.**

|                                                                                                                                                                                                                                                                                                                                       |        |             |                                |
|---------------------------------------------------------------------------------------------------------------------------------------------------------------------------------------------------------------------------------------------------------------------------------------------------------------------------------------|--------|-------------|--------------------------------|
| Standard neurosurgical technique for glioma resection under general anesthesia without intraoperative electrical stimulation (IES) or other neurophysiological monitoring VERSUS None IN Specific disease- WHO grade II gliomas within eloquent areas; Age- 19 to 40 years, 41 to 64 years, >=65 years; Gender- Both; Country- Spain. | 27904  | 29000       | Martino et al., 2013 (15)      |
| Temodar VERSUS Standard/Usual Care IN Specific disease- glioblastoma; Age- Adult; Gender- Both; Country- United States.                                                                                                                                                                                                               | 102364 | 110000      | Messali et al., 2013 (16)      |
| Temozolomide VERSUS Standard/Usual Care IN Specific disease- glioblastoma; Age- Adult; Gender- Both; Country- United States.                                                                                                                                                                                                          | 8875   | 9300        | Messali et al., 2013 (16)      |
| Proton therapy VERSUS Photon therapy IN Specific disease- pediatric medulloblastoma; Age- 19 to 40 years, 41 to 64 years, >=65 years; Gender- Both; Country- United States.                                                                                                                                                           | -9416  | Cost-Saving | Mailhot Vega et al., 2013 (17) |

## Breast Cancer

| Description                                                                                                                                                                                                                                                                                                   | Original US\$/QALY | 2014US\$/QALY | Reference                 |
|---------------------------------------------------------------------------------------------------------------------------------------------------------------------------------------------------------------------------------------------------------------------------------------------------------------|--------------------|---------------|---------------------------|
| Adjuvant Chemotherapy for women age 60, assuming lifelong benefit VERSUS No adjuvant chemotherapy, women age 60 IN Women with Stage I or IIa , node negative, estrogen receptor negative breast cancer following surgery.                                                                                     | 7400               | 14000         | Hillner et al., 1991 (18) |
| Adjuvant Chemotherapy for women age 45, assuming increase in disease free survival, but no change in overall 10 year survival with treatment VERSUS No adjuvant chemotherapy for women age 45 IN 45 yo women with Stage I or IIa , node negative, estrogen receptor negative breast cancer following surgery. | 48500              | 93000         | Hillner et al., 1991 (18) |

**Appendix**  
**Cost-Utility Analysis of Cancer Prevention, Treatment, and Control: A Systematic Review**  
**Winn et al.**

|                                                                                                                                                                                                                                                                                                            |       |        |                             |
|------------------------------------------------------------------------------------------------------------------------------------------------------------------------------------------------------------------------------------------------------------------------------------------------------------|-------|--------|-----------------------------|
| Adjuvant Chemotherapy for women age 60, assuming increase in disease free survival, but no change in overall 10 year survival with treatment VERSUS No adjuvant chemotherapy, women age 60 IN 60 yo women with Stage I or IIa , node negative, estrogen receptor negative breast cancer following surgery. | 56800 | 110000 | Hillner et al., 1991 (18)   |
| Adjuvant Chemotherapy for women age 45, assuming 5 years of benefit VERSUS No adjuvant chemotherapy for women age 45 IN 45 yo women with Stage I or IIa , node negative, estrogen receptor negative breast cancer following surgery.                                                                       | 15400 | 29000  | Hillner et al., 1991 (18)   |
| Adjuvant Chemotherapy for women age 60, assuming 5 years of benefit VERSUS No adjuvant chemotherapy, women age 60 IN 60 yo women with Stage I or IIa , node negative, estrogen receptor negative breast cancer following surgery.                                                                          | 18800 | 36000  | Hillner et al., 1991 (18)   |
| Adjuvant Chemotherapy for women age 45, assuming lifelong benefit VERSUS No adjuvant chemotherapy for women age 45 IN Women with Stage I or IIa , node negative, estrogen receptor negative breast cancer following surgery.                                                                               | 5100  | 9700   | Hillner et al., 1991 (18)   |
| Biennial breast cancer screening in 50-70 yo VERSUS Triennial breast cancer screening in 50-65 yo IN Population of Dutch women                                                                                                                                                                             | 5495  | 10000  | de Koning et al., 1991 (19) |
| Triennial breast cancer screening in 50-65 yo VERSUS No screening program IN Population of Dutch women                                                                                                                                                                                                     | 3400  | 6200   | de Koning et al., 1991 (19) |
| Breast cancer screening in 50-70 yo every 1.3 yrs VERSUS Biennial breast cancer screening in 50-70 yo IN Population of Dutch women                                                                                                                                                                         | 11176 | 20000  | de Koning et al., 1991 (19) |
| Biennial breast cancer screening in 50-75 yo VERSUS Biennial breast cancer screening in 50-70 yo IN Population of Dutch women                                                                                                                                                                              | 16000 | 29000  | de Koning et al., 1991 (19) |
| high dose chemotherapy with ABMT VERSUS standard chemotherapy IN 45 yo woman metastatic (stage IV) breast CA                                                                                                                                                                                               | 96600 | 170000 | Hillner et al., 1992 (20)   |
| high dose chemotherapy with ABMT VERSUS standard chemotherapy IN 45 yo woman metastatic (stage IV) breast CA                                                                                                                                                                                               | 27300 | 49000  | Hillner et al., 1992 (20)   |
| Chemotherapy VERSUS No chemotherapy IN 45-yo premenopausal women who have undergone surgery for node-negative, estrogen-receptor-negative stage I or IIa breast cancer                                                                                                                                     | 15400 | 29000  | Hillner et al., 1992 (21)   |



**Appendix**  
**Cost-Utility Analysis of Cancer Prevention, Treatment, and Control: A Systematic Review**  
**Winn et al.**

|                                                                                                                                                                                                                                     |        |        |                           |
|-------------------------------------------------------------------------------------------------------------------------------------------------------------------------------------------------------------------------------------|--------|--------|---------------------------|
| Chemotherapy VERSUS No chemotherapy IN 60-yo premenopausal women who have undergone surgery for node-negative, estrogen-receptor-negative stage I or IIa breast cancer                                                              | 18800  | 36000  | Hillner et al., 1992 (21) |
| adjuvant chemotherapy VERSUS no adjuvant chemotherapy IN 60 yo woman with early stage breast CA node negative, estrogen receptor negative                                                                                           | 28000  | 53000  | Hillner et al., 1993 (22) |
| adjuvant chemotherapy VERSUS no adjuvant chemotherapy IN 75 yo woman with early stage breast CA node negative, estrogen receptor negative                                                                                           | 44000  | 84000  | Hillner et al., 1993 (22) |
| Tamoxifen VERSUS no treatment IN 45 yo premenopausal woman with early stage breast CA either node - or + &, estrogen receptors (ER) + or -                                                                                          | 11440  | 22000  | Smith et al., 1993 (23)   |
| Chemotherapy (cyclophosphamide, methotrexate and fluorouracil for 6 months) VERSUS Tamoxifen IN 45 yo premenopausal woman with early stage breast CA either node - or + &, estrogen receptors (ER) + or -                           | 11370  | 22000  | Smith et al., 1993 (23)   |
| Combined (chemotherapy & tamoxifen) VERSUS Chemotherapy alone (cyclophosphamide, methotrexate and fluorouracil) IN 45 yo premenopausal woman with early stage breast CA either node - or + &, estrogen receptors (ER) + or -        | 33100  | 63000  | Smith et al., 1993 (23)   |
| Tamoxifen VERSUS no treatment IN 45 yo premenopausal woman with early stage breast CA either node - or + &, estrogen receptors (ER) + or -                                                                                          | 214000 | 410000 | Smith et al., 1993 (23)   |
| Chemotherapy (cyclophosphamide, methotrexate and fluorouracil for 6 months) VERSUS Tamoxifen IN 45 yo premenopausal woman with early stage breast CA either node - or + &, estrogen receptors (ER) + or -                           | 4970   | 9500   | Smith et al., 1993 (23)   |
| Combined (chemotherapy & tamoxifen) VERSUS Chemotherapy (cyclophosphamide, methotrexate and fluorouracil for 6 months) IN 45 yo premenopausal woman with early stage breast CA either node - or + &, estrogen receptors (ER) + or - | 186200 | 360000 | Smith et al., 1993 (23)   |

**Appendix**  
**Cost-Utility Analysis of Cancer Prevention, Treatment, and Control: A Systematic Review**  
**Winn et al.**

|                                                                                                                                                                                                                                     |       |        |                              |
|-------------------------------------------------------------------------------------------------------------------------------------------------------------------------------------------------------------------------------------|-------|--------|------------------------------|
| Tamoxifen VERSUS no treatment IN 45 yo premenopausal woman with early stage breast CA either node - or + &, estrogen receptors (ER) + or -                                                                                          | 4330  | 8300   | Smith et al., 1993 (23)      |
| Chemotherapy (cyclophosphamide, methotrexate and fluorouracil for 6 months) VERSUS Tamoxifen IN 45 yo premenopausal woman with early stage breast CA either node - or + &, estrogen receptors (ER) + or -                           | 9230  | 18000  | Smith et al., 1993 (23)      |
| Combined (chemotherapy & tamoxifen) VERSUS Chemotherapy (cyclophosphamide, methotrexate and fluorouracil for 6 months) IN 45 yo premenopausal woman with early stage breast CA either node - or + &, estrogen receptors (ER) + or - | 14750 | 28000  | Smith et al., 1993 (23)      |
| Tamoxifen VERSUS no treatment IN 45 yo premenopausal woman with early stage breast CA either node - or + &, estrogen receptors (ER) + or -                                                                                          | 4330  | 8300   | Smith et al., 1993 (23)      |
| Chemotherapy (cyclophosphamide, methotrexate and fluorouracil for 6 months) VERSUS Tamoxifen IN 45 yo premenopausal woman with early stage breast CA either node - or + &, estrogen receptors (ER) + or -                           | 4890  | 9300   | Smith et al., 1993 (23)      |
| Combined (chemotherapy & tamoxifen) VERSUS Chemotherapy (cyclophosphamide, methotrexate and fluorouracil for 6 months) IN 45 yo premenopausal woman with early stage breast CA either node - or + &, estrogen receptors (ER) + or - | 80700 | 150000 | Smith et al., 1993 (23)      |
| chemotherapy VERSUS no chemotherapy IN 60 yo with breast CA                                                                                                                                                                         | 28200 | 54000  | Desch et al., 1993 (24)      |
| chemotherapy VERSUS no chemotherapy IN 65 yo with breast CA                                                                                                                                                                         | 31300 | 60000  | Desch et al., 1993 (24)      |
| chemotherapy VERSUS no chemotherapy IN 70 yo with breast CA                                                                                                                                                                         | 36300 | 69000  | Desch et al., 1993 (24)      |
| chemotherapy VERSUS no chemotherapy IN 75 yo with breast CA                                                                                                                                                                         | 44400 | 85000  | Desch et al., 1993 (24)      |
| chemotherapy VERSUS no chemotherapy IN 80 yo with breast CA                                                                                                                                                                         | 57100 | 110000 | Desch et al., 1993 (24)      |
| Immediate biopsy VERSUS 6-month observation IN 50-yo woman with abnormal, suspicious findings on mammogram                                                                                                                          | 2257  | 3700   | Velanovich et al., 1995 (25) |
| Breast cancer screening every 2 yrs. VERSUS No breast cancer screening past age 69 IN 70-75 yo women                                                                                                                                | 14986 | 27000  | Boer et al., 1995 (26)       |

**Appendix**  
**Cost-Utility Analysis of Cancer Prevention, Treatment, and Control: A Systematic Review**  
**Winn et al.**

|                                                                                                                                                                                                                                                                                                                             |        |             |                             |
|-----------------------------------------------------------------------------------------------------------------------------------------------------------------------------------------------------------------------------------------------------------------------------------------------------------------------------|--------|-------------|-----------------------------|
| Breast cancer screening every 2 yrs. VERSUS No breast cancer screening past age 75 IN 75-79 yo women                                                                                                                                                                                                                        | 64228  | 120000      | Boer et al., 1995 (26)      |
| Second-line treatment with docetaxel VERSUS Second-line treatment with paclitaxel IN Patients with recurrent widely disseminated metastatic breast cancer who are failing on standard treatments                                                                                                                            | 3724   | 5900        | Hutton et al., 1996 (27)    |
| Paclitaxel VERSUS Vinorelbine IN Metastatic Breast Disease                                                                                                                                                                                                                                                                  | -642   | Cost-Saving | Launois et al., 1996 (28)   |
| Docetaxel VERSUS Paclitaxel IN Metastatic Breast Disease                                                                                                                                                                                                                                                                    | -117   | Cost-Saving | Launois et al., 1996 (28)   |
| universal screening program VERSUS no screening program IN Nordic population                                                                                                                                                                                                                                                | 4515   | 6800        | Hristova et al., 1997 (29)  |
| Breast conserving surgery VERSUS Modified radical mastectomy IN Women with breast cancer stage I & II                                                                                                                                                                                                                       | 20508  | 31000       | Norum et al., 1997 (30)     |
| Postoperative radiotherapy (XRT) VERSUS Surgery alone without postoperative radiotherapy IN Women <80yoa with unifocal breast CA that 1) is <=20mm size on pre-op mammogram; 2) has negative tumor margins 20mm from primary tumor border; 3) have negative axillary nodes; and 4) had no tumor transection during surgery. | 18610  | 30000       | Liljegren et al., 1997 (31) |
| Postoperative radiotherapy (XRT) VERSUS Surgery alone without postoperative radiotherapy IN Women <80yoa with unifocal breast CA that 1) is <=20mm size on pre-op mammogram; 2) has negative tumor margins 20mm from primary tumor border; 3) have negative axillary nodes; and 4) had no tumor transection during surgery. | 9011   | 15000       | Liljegren et al., 1997 (31) |
| Routine postoperative radiotherapy (XRT) after sector resection and axillary dissection VERSUS Standardized sector resection and axillary dissection IN All breast cancer stage I patients (<80 yo with unifocal breast cancer & maximum tumor diameter of 20 mm on preoperative mammogram)                                 | 144745 | 240000      | Liljegren et al., 1997 (31) |

**Appendix**  
**Cost-Utility Analysis of Cancer Prevention, Treatment, and Control: A Systematic Review**  
**Winn et al.**

|                                                                                                                                                                                                                                                                                                                                                 |         |                                      |                               |
|-------------------------------------------------------------------------------------------------------------------------------------------------------------------------------------------------------------------------------------------------------------------------------------------------------------------------------------------------|---------|--------------------------------------|-------------------------------|
| Routine postoperative radiotherapy (XRT) after sector resection and axillary dissection VERSUS Standardized sector resection and axillary dissection IN Breast cancer stage I patients (<80 yo with unifocal breast cancer & maximum tumor diameter of 20 mm on preoperative mammogram) at intermediate/high-risk of local recurrence in 5 yrs. | 68483   | 110000                               | Liljegren et al., 1997 (31)   |
| Routine postoperative radiotherapy (XRT) after sector resection and axillary dissection VERSUS Standardized sector resection and axillary dissection IN Breast cancer stage I patients (<80 yo with unifocal breast cancer & maximum tumor diameter of 20 mm on preoperative mammogram) at low-risk of local recurrence in 5 yrs.               | -430449 | Increases Costs,<br>Decreases Health | Liljegren et al., 1997 (31)   |
| Prophylactic oophorectomy and mastectomy VERSUS Frequent screening and close surveillance IN 30 year-old women from Ashkenazi Jewish or other high-risk families with BRCA1 or BRCA2 gene mutations, with 56% breast cancer risk and 16% ovarian cancer risk over 40 years                                                                      | -4652   | Increases Costs,<br>Decreases Health | Grann et al., 1998 (32)       |
| Breast conserving surgery with radiation therapy (XRT) VERSUS Breast conserving surgery alone IN 60yo female undergoing breast conserving surgery (lumpectomy) and axillary dissection for early stage breast cancer (Stage I or II)                                                                                                            | 28000   | 43000                                | Hayman et al., 1998 (33)      |
| Docetaxel 100mg/m2 VERSUS Paclitaxel 200mg/m2 IN Women with advanced metastatic breast cancer who have failed previous chemotherapy                                                                                                                                                                                                             | 8615    | 13000                                | Brown et al., 1998 (34)       |
| Prophylactic promidronate infusions VERSUS No prophylactic treatment for skeletal related events (placebo) IN Metastatic breast cancer patients receiving either 1st- or 2nd-line chemotherapy, with at least one osteolytic bone lesion                                                                                                        | 13506   | 20000                                | Dranitsaris et al., 1999 (35) |
| Axillary lymph node dissection (ALND) VERSUS Watchful waiting IN Postmenopausal women with estrogen receptor -positive breast cancer and clinically negative axillary nodes                                                                                                                                                                     | 36700   | 54000                                | Orr et al., 1999 (36)         |

**Appendix**  
**Cost-Utility Analysis of Cancer Prevention, Treatment, and Control: A Systematic Review**  
**Winn et al.**

|                                                                                                                                                                                                                                                               |         |             |                         |
|---------------------------------------------------------------------------------------------------------------------------------------------------------------------------------------------------------------------------------------------------------------|---------|-------------|-------------------------|
| Axillary lymph node dissection (ALND) VERSUS Watchful waiting IN Postmenopausal women with estrogen receptor -positive breast cancer and clinically negative axillary nodes                                                                                   | 270000  | 400000      | Orr et al., 1999 (36)   |
| Vinorelbine VERSUS Docetaxel IN Patients with anthracycline-resistant metastatic breast cancer                                                                                                                                                                |         | Cost-Saving | Leung et al., 1999 (37) |
| Vinorelbine VERSUS Paclitaxel IN Patients with anthracycline-resistant metastatic breast cancer                                                                                                                                                               |         | Cost-Saving | Leung et al., 1999 (37) |
| Paclitaxel VERSUS Docetaxel IN Patients with anthracycline-resistant metastatic breast cancer                                                                                                                                                                 |         | Cost-Saving | Leung et al., 1999 (37) |
| Excisional biopsy VERSUS Magnetic Resonance Imaging IN Women with suspicious breast lesions                                                                                                                                                                   | 576258  | 900000      | Hrung et al., 1999 (38) |
| Excisional biopsy VERSUS Core-needle biopsy IN Women with suspicious breast lesions                                                                                                                                                                           | 253540  | 390000      | Hrung et al., 1999 (38) |
| Magnetic Resonance Imaging VERSUS Core-needle biopsy IN Women with suspicious breast lesions                                                                                                                                                                  | 69446   | 110000      | Hrung et al., 1999 (38) |
| Combination testing for BRCA1 and BRCA2 genes, then oophorectomy if positive VERSUS No intervention IN 30 year old women with average population risk for BRCA1 or BRCA2 gene mutation                                                                        | 1420500 | 2100000     | Tengs et al., 2000 (39) |
| Combination testing for BRCA1 and BRCA2 genes, then oophorectomy if positive VERSUS No intervention IN 30 year old women with slight increased risk for BRCA1 or BRCA2 gene mutation (at least one case of ovarian and/or early breast cancer in family)      | 37657   | 55000       | Tengs et al., 2000 (39) |
| Combination testing for BRCA1 and BRCA2 genes, then oophorectomy if positive VERSUS No intervention IN 30 year old women with moderate increased risk for BRCA1 or BRCA2 gene mutation (at least a few cases of ovarian and/or early breast cancer in family) | 15000   | 22000       | Tengs et al., 2000 (39) |
| Combination testing for BRCA1 and BRCA2 genes, then oophorectomy if positive VERSUS No intervention IN 30 year old women with high increased risk for BRCA1 gene mutation (p=0.25) and BRCA2 gene mutation (p=0.25)                                           | 4300    | 6200        | Tengs et al., 2000 (39) |

**Appendix**  
**Cost-Utility Analysis of Cancer Prevention, Treatment, and Control: A Systematic Review**  
**Winn et al.**

|                                                                                                                                                                                                                    |        |             |                           |
|--------------------------------------------------------------------------------------------------------------------------------------------------------------------------------------------------------------------|--------|-------------|---------------------------|
| Combination testing for BRCA1 and BRCA2 genes, then oophorectomy if positive VERSUS No intervention IN 30 year old women with high increased risk for BRCA1 gene mutation (p=0.50) and BRCA2 gene mutation (p=0.0) | 3500   | 5100        | Tengs et al., 2000 (39)   |
| Combination testing for BRCA1 and BRCA2 genes, then oophorectomy if positive VERSUS No intervention IN 30 year old women with high increased risk for BRCA2 gene mutation (p=0.50) and BRCA1 gene mutation (p=0.0) | 4900   | 7100        | Tengs et al., 2000 (39)   |
| Pamidronate VERSUS Placebo IN Women undergoing chemotherapy for metastatic breast cancer with one or more osteolytic lesions >1cm in diameter and an expected survival of greater than 9 months.                   | 108200 | 160000      | Hillner et al., 2000 (40) |
| Pamidronate VERSUS Placebo IN Women undergoing hormonal therapy for metastatic breast cancer with one or more osteolytic lesions >1cm in diameter and an expected survival of greater than 9 months.               | 305300 | 440000      | Hillner et al., 2000 (40) |
| Tangenital radiation VERSUS Treatment without electron-beam boost IN Patients after conservative surgery for early stage breast cancer                                                                             | 308923 | 480000      | Hayman et al., 2000 (41)  |
| Prophylactic surgery (oophorectomy, mastectomy, or both) VERSUS Surveillance IN 30 year-old women with high-risk breast cancer 1/2 (BRCA 1 or 2) mutations                                                         |        | Cost-Saving | Grann et al., 2000 (42)   |
| Chemoprevention with tamoxifen VERSUS Surveillance IN 30 year-old women with high-risk breast cancer 1/2 (BRCA 1 or 2) mutations                                                                                   | 898    | 1300        | Grann et al., 2000 (42)   |
| Chemoprevention with raloxifene VERSUS Surveillance IN 30 year-old women with high-risk breast cancer 1/2 (BRCA 1 or 2) mutations                                                                                  |        | Cost-Saving | Grann et al., 2000 (42)   |
| Chemoprevention with oral contraceptives VERSUS Surveillance IN 30 year-old women with high-risk breast cancer 1/2 (BRCA 1 or 2) mutations                                                                         |        | Cost-Saving | Grann et al., 2000 (42)   |

**Appendix**  
**Cost-Utility Analysis of Cancer Prevention, Treatment, and Control: A Systematic Review**  
**Winn et al.**

|                                                                                                                                                                                             |        |             |                         |
|---------------------------------------------------------------------------------------------------------------------------------------------------------------------------------------------|--------|-------------|-------------------------|
| Chemoprevention with oral contraceptives VERSUS Surveillance IN 40 year-old women with high-risk breast cancer 1/2 (BRCA 1 or 2) mutations                                                  |        | Cost-Saving | Grann et al., 2000 (42) |
| Chemoprevention with raloxifene VERSUS Surveillance IN 40 year-old women with high-risk breast cancer 1/2 (BRCA 1 or 2) mutations                                                           |        | Cost-Saving | Grann et al., 2000 (42) |
| Chemoprevention with tamoxifen VERSUS Surveillance IN 40 year-old women with high-risk breast cancer 1/2 (BRCA 1 or 2) mutations                                                            | 1639   | 2400        | Grann et al., 2000 (42) |
| Prophylactic surgery (oophorectomy, mastectomy, or both) VERSUS Surveillance IN 40 year-old women with high-risk breast cancer 1/2 (BRCA 1 or 2) mutations                                  |        | Cost-Saving | Grann et al., 2000 (42) |
| Prophylactic surgery (oophorectomy or mastectomy) VERSUS Surveillance IN 50 year-old women with high-risk breast cancer 1/2 (BRCA 1 or 2) mutations                                         |        | Cost-Saving | Grann et al., 2000 (42) |
| Chemoprevention with oral contraceptives VERSUS Surveillance IN 50 year-old women with high-risk breast cancer 1/2 (BRCA 1 or 2) mutations                                                  |        | Cost-Saving | Grann et al., 2000 (42) |
| Chemoprevention with raloxifene VERSUS Surveillance IN 50 year-old women with high-risk breast cancer 1/2 (BRCA 1 or 2) mutations                                                           |        | Cost-Saving | Grann et al., 2000 (42) |
| Chemoprevention with tamoxifen VERSUS Surveillance IN 50 year-old women with high-risk breast cancer 1/2 (BRCA 1 or 2) mutations                                                            | 3249   | 4700        | Grann et al., 2000 (42) |
| Tamoxifen chemoprevention (10 mg orally, twice daily) VERSUS Surveillance IN 35 year-old women at high risk for breast cancer (at least equivalent to that of an average 60 year-old woman) | 76318  | 110000      | Grann et al., 2000 (43) |
| Tamoxifen chemoprevention (10 mg orally, twice daily) VERSUS Surveillance IN 50 year-old women at high risk for breast cancer (at least equivalent to that of an average 60 year-old woman) | 130660 | 190000      | Grann et al., 2000 (43) |

**Appendix**  
**Cost-Utility Analysis of Cancer Prevention, Treatment, and Control: A Systematic Review**  
**Winn et al.**

|                                                                                                                                                                                                                                                                    |         |                                      |                               |
|--------------------------------------------------------------------------------------------------------------------------------------------------------------------------------------------------------------------------------------------------------------------|---------|--------------------------------------|-------------------------------|
| Tamoxifen chemoprevention (10 mg orally, twice daily) VERSUS Surveillance IN 60 year-old women at high risk for breast cancer                                                                                                                                      | 142227  | 210000                               | Grann et al., 2000 (43)       |
| Anastrozole VERSUS Megestrol acetate IN Postmenopausal women with hormone sensitive (ER/PR+) advanced breast cancer, who are anthracycline naive and have failed first-line hormonal therapy with tamoxifen                                                        | 7020    | 10000                                | Dranitsaris et al., 2000 (44) |
| Letrozole VERSUS Megestrol acetate IN Postmenopausal women with hormone sensitive (ER/PR+) advanced breast cancer, who are anthracycline naive and have failed first-line hormonal therapy with tamoxifen                                                          | 1044    | 1500                                 | Dranitsaris et al., 2000 (44) |
| Locoregional radiotherapy adjuvant to surgery and chemotherapy VERSUS Surgery and chemotherapy IN Premenopausal node-positive breast cancer patients                                                                                                               | 11267   | 17000                                | Duncombe et al., 2000 (45)    |
| Second-line chemotherapy with paclitaxel VERSUS Combination therapy with vinorelbine plus mitomycin C IN Female patient (aged 18-70) histologically diagnosed with metastatic breast cancer and progressive disease after 1st-line chemotherapy                    | -164450 | Increases Costs,<br>Decreases Health | Li et al., 2001 (46)          |
| Second-line chemotherapy with docetaxel VERSUS Combination therapy with vinorelbine plus mitomycin C IN Female patient (aged 18-70) histologically diagnosed with metastatic breast cancer and progressive disease after 1st-line chemotherapy                     | -362500 | Increases Costs,<br>Decreases Health | Li et al., 2001 (46)          |
| Combination therapy with vinorelbine plus mitomycin C VERSUS Mitomycin plus vinblastine (standard 2nd-line chemotherapy) IN Female patient (aged 18-70) histologically diagnosed with metastatic breast cancer and progressive disease after 1st-line chemotherapy | 23046   | 33000                                | Li et al., 2001 (46)          |



**Appendix**  
**Cost-Utility Analysis of Cancer Prevention, Treatment, and Control: A Systematic Review**  
**Winn et al.**

|                                                                                                                                                                                                                                                            |        |        |                             |
|------------------------------------------------------------------------------------------------------------------------------------------------------------------------------------------------------------------------------------------------------------|--------|--------|-----------------------------|
| Docetaxel as 2nd-line chemotherapy VERSUS Paclitaxel (6 courses at 3-week intervals) as 2nd-line chemotherapy IN Patient diagnosed with advanced breast cancer with disease progression and metastases following 1st-line chemotherapy with anthracyclines | 3431   | 5000   | Brown et al., 2001 (47)     |
| Docetaxel as 2nd-line chemotherapy VERSUS Vinorelbine (12 weekly courses) as 2nd-line chemotherapy IN Patient diagnosed with advanced breast cancer with disease progression and metastases following 1st-line chemotherapy with anthracyclines            | 24529  | 36000  | Brown et al., 2001 (47)     |
| Hormone replacement therapy -long term therapy VERSUS No intervention IN Healthy 50-year old post-menopausal women                                                                                                                                         | 2173   | 3000   | Armstrong et al., 2001 (48) |
| Hormone replacement therapy -5 year therapy VERSUS No intervention IN Healthy 50-year old post-menopausal women                                                                                                                                            | 5020   | 6900   | Armstrong et al., 2001 (48) |
| Hormone replacement therapy -10 year therapy VERSUS No intervention IN Healthy 50-year old post-menopausal women                                                                                                                                           | 4260   | 5900   | Armstrong et al., 2001 (48) |
| Raloxifene therapy-long term VERSUS No intervention IN Healthy 50-year old post-menopausal women                                                                                                                                                           | 9824   | 14000  | Armstrong et al., 2001 (48) |
| Raloxifene therapy-5 years VERSUS No intervention IN Healthy 50-year old post-menopausal women                                                                                                                                                             | 9328   | 13000  | Armstrong et al., 2001 (48) |
| Raloxifene therapy-10 years VERSUS No intervention IN Healthy 50-year old post-menopausal women                                                                                                                                                            | 7886   | 11000  | Armstrong et al., 2001 (48) |
| Raloxifene therapy-5 years VERSUS Hormone replacement therapy-5 years IN Healthy 50-year old post-menopausal women                                                                                                                                         | 37029  | 51000  | Armstrong et al., 2001 (48) |
| Raloxifene therapy-10 years VERSUS Hormone replacement therapy-10 years IN Healthy 50-year old post-menopausal women                                                                                                                                       | 32992  | 45000  | Armstrong et al., 2001 (48) |
| Tamoxifen for primary prevention VERSUS No Tamoxifen IN Women at very high risk of breast cancer (Gail model RR>1.6) - age 35                                                                                                                              | 79320  | 120000 | Hershman et al., 2002 (49)  |
| Tamoxifen for primary prevention VERSUS No Tamoxifen IN Women at very high risk of breast cancer (Gail model RR>1.6) - age 50                                                                                                                              | 122519 | 180000 | Hershman et al., 2002 (49)  |
| Tamoxifen for primary prevention VERSUS No Tamoxifen IN Women at very high risk of breast cancer (Gail model RR>1.6) - age 60                                                                                                                              | 137753 | 200000 | Hershman et al., 2002 (49)  |

**Appendix**  
**Cost-Utility Analysis of Cancer Prevention, Treatment, and Control: A Systematic Review**  
**Winn et al.**

|                                                                                                                                                         |       |        |                            |
|---------------------------------------------------------------------------------------------------------------------------------------------------------|-------|--------|----------------------------|
| Tamoxifen for primary prevention VERSUS No Tamoxifen IN Women at very high risk of breast cancer (atypical hyperplasia) - age 35                        | 9777  | 14000  | Hershman et al., 2002 (49) |
| Tamoxifen for primary prevention VERSUS No Tamoxifen IN Women at very high risk of breast cancer (atypical hyperplasia) - age 50                        | 26990 | 39000  | Hershman et al., 2002 (49) |
| Tamoxifen for primary prevention VERSUS No Tamoxifen IN Women at very high risk of breast cancer (atypical hyperplasia) - age 60                        | 53765 | 78000  | Hershman et al., 2002 (49) |
| Tamoxifen for primary prevention VERSUS No Tamoxifen IN Women at very high risk of breast cancer (5-year Gail model risk>5%) - age 35                   | 10818 | 16000  | Hershman et al., 2002 (49) |
| Tamoxifen for primary prevention VERSUS No Tamoxifen IN Women at very high risk of breast cancer (5-year Gail model risk>5%) - age 50                   | 27901 | 41000  | Hershman et al., 2002 (49) |
| Tamoxifen for primary prevention VERSUS No Tamoxifen IN Women at very high risk of breast cancer (5-year Gail model risk>5%) - age 60                   | 54884 | 80000  | Hershman et al., 2002 (49) |
| Tamoxifen for primary prevention VERSUS No Tamoxifen IN Women at very high risk of breast cancer (lobular carcinoma-in-situ) - age 35                   | 16232 | 24000  | Hershman et al., 2002 (49) |
| Tamoxifen for primary prevention VERSUS No Tamoxifen IN Women at very high risk of breast cancer (lobular carcinoma-in-situ) - age 50                   | 37351 | 54000  | Hershman et al., 2002 (49) |
| Tamoxifen for primary prevention VERSUS No Tamoxifen IN Women at very high risk of breast cancer (lobular carcinoma in-situ) - age 60                   | 68334 | 99000  | Hershman et al., 2002 (49) |
| Tamoxifen for primary prevention VERSUS No Tamoxifen IN Women at very high risk of breast cancer (two or more first-degree relatives affected) - age 35 | 40990 | 60000  | Hershman et al., 2002 (49) |
| Tamoxifen for primary prevention VERSUS No Tamoxifen IN Women at very high risk of breast cancer (two or more first-degree relatives affected) - age 50 | 80869 | 120000 | Hershman et al., 2002 (49) |

**Appendix**  
**Cost-Utility Analysis of Cancer Prevention, Treatment, and Control: A Systematic Review**  
**Winn et al.**

|                                                                                                                                                                                                                                                                                |        |        |                            |
|--------------------------------------------------------------------------------------------------------------------------------------------------------------------------------------------------------------------------------------------------------------------------------|--------|--------|----------------------------|
| Tamoxifen for primary prevention VERSUS No Tamoxifen IN Women at very high risk of breast cancer (two or more first-degree relatives affected) - age 60                                                                                                                        | 127750 | 190000 | Hershman et al., 2002 (49) |
| Tamoxifen and chemotherapy VERSUS Tamoxifen alone IN Postmenopausal women with node-positive early breast cancer                                                                                                                                                               | 5279   | 7300   | Karnon et al., 2002 (50)   |
| Mastectomy, chemotherapy, and postmastectomy radiation therapy VERSUS Mastectomy and chemotherapy IN Premenopausal women who have undergone mastectomy and are lymph-node positive status - age 45                                                                             | 22600  | 31000  | Lee et al., 2002 (51)      |
| Adjuvant chemotherapy (AC) plus surgery VERSUS Surgery alone IN Women with estrogen-receptor positive breast cancer and negative lymph nodes (early stage:confined to the breast or spread only to lymph nodes under the arm) - age 45                                         | 3278   | 4700   | Malin et al., 2002 (52)    |
| Adjuvant chemotherapy (AC) and tamoxifen plus surgery VERSUS Adjuvant chemotherapy (AC) plus surgery IN Women with estrogen-receptor positive breast cancer and negative lymph nodes (early stage:confined to the breast or spread only to lymph nodes under the arm) - age 45 | 5428   | 7700   | Malin et al., 2002 (52)    |
| Adjuvant chemotherapy (AC) plus surgery VERSUS Surgery alone IN Women with estrogen-receptor positive breast cancer and negative lymph nodes (early stage:confined to the breast or spread only to lymph nodes under the arm) - age 45                                         | 3278   | 4700   | Malin et al., 2002 (52)    |
| Tamoxifen plus surgery VERSUS Surgery alone IN Women with estrogen-receptor positive breast cancer and negative lymph nodes (early stage:confined to the breast or spread only to lymph nodes under the arm) - age 60                                                          | 6176   | 8800   | Malin et al., 2002 (52)    |

**Appendix**  
**Cost-Utility Analysis of Cancer Prevention, Treatment, and Control: A Systematic Review**  
**Winn et al.**

|                                                                                                                                                                                                                                                                                |       |       |                         |
|--------------------------------------------------------------------------------------------------------------------------------------------------------------------------------------------------------------------------------------------------------------------------------|-------|-------|-------------------------|
| Adjuvant chemotherapy (AC) plus surgery VERSUS Tamoxifen plus surgery IN Women with estrogen-receptor positive breast cancer and negative lymph nodes (early stage:confined to the breast or spread only to lymph nodes under the arm) - age 60                                | 13050 | 19000 | Malin et al., 2002 (52) |
| Adjuvant chemotherapy (AC) plus surgery VERSUS Surgery alone IN Women with estrogen-receptor positive breast cancer and negative lymph nodes (early stage:confined to the breast or spread only to lymph nodes under the arm) - age 60                                         | 9866  | 14000 | Malin et al., 2002 (52) |
| Adjuvant chemotherapy (AC) and tamoxifen plus surgery VERSUS Surgery alone IN Women with estrogen-receptor positive breast cancer and negative lymph nodes (early stage:confined to the breast or spread only to lymph nodes under the arm) - age 60                           | 7375  | 10000 | Malin et al., 2002 (52) |
| Tamoxifen plus surgery VERSUS Surgery alone IN Women with estrogen-receptor positive breast cancer and negative lymph nodes (early stage:confined to the breast or spread only to lymph nodes under the arm) - age 60                                                          | 4335  | 6200  | Malin et al., 2002 (52) |
| Adjuvant chemotherapy (AC) and tamoxifen plus surgery VERSUS Tamoxifen plus surgery IN Women with estrogen-receptor positive breast cancer and negative lymph nodes (early stage:confined to the breast or spread only to lymph nodes under the arm) - age 60                  | 8385  | 12000 | Malin et al., 2002 (52) |
| Adjuvant chemotherapy (AC) and tamoxifen plus surgery VERSUS Adjuvant chemotherapy (AC) plus surgery IN Women with estrogen-receptor positive breast cancer and negative lymph nodes (early stage:confined to the breast or spread only to lymph nodes under the arm) - age 45 | 3577  | 5100  | Malin et al., 2002 (52) |

**Appendix**  
**Cost-Utility Analysis of Cancer Prevention, Treatment, and Control: A Systematic Review**  
**Winn et al.**

|                                                                                                                                                                                                                                                                     |        |        |                               |
|---------------------------------------------------------------------------------------------------------------------------------------------------------------------------------------------------------------------------------------------------------------------|--------|--------|-------------------------------|
| Adjuvant chemotherapy (AC) plus surgery VERSUS Surgery alone IN Women with estrogen-receptor positive breast cancer and negative lymph nodes (early stage:confined to the breast or spread only to lymph nodes under the arm) - age 45                              | 2636   | 3700   | Malin et al., 2002 (52)       |
| Adjuvant chemotherapy (AC) plus surgery VERSUS Surgery alone IN Women with estrogen-receptor positive breast cancer and negative lymph nodes (early stage:confined to the breast or spread only to lymph nodes under the arm) - age 45                              | 2636   | 3700   | Malin et al., 2002 (52)       |
| Breast conservation surgery with radiation VERSUS Mastectomy IN Female Medicare recipients with Stage I or II breast cancer with no previous cancer diagnosis - age 67+                                                                                             | 219594 | 290000 | Polsky et al., 2003 (53)      |
| Patient choice between breast conservation surgery with radiation treatment (BCSRT) or mastectomy VERSUS Mastectomy IN Female Medicare recipients with Stage I or II breast cancer with no previous cancer diagnosis - age 67+                                      | 80440  | 110000 | Polsky et al., 2003 (53)      |
| Letrozole (2.5 mg/day) as first-line hormonal therapy VERSUS Tamoxifen (20 mg/day) as first-line hormonal therapy IN Postmenopausal women with advanced breast cancer that is estrogen receptor and/or progesterone receptor positive or of unknown receptor status | 5226   | 7200   | Karnon et al., 2003 (54)      |
| Letrozole - 2.5 mg daily VERSUS Tamoxifen - 20mg daily IN Postmenopausal women with advanced hormone-sensitive breast cancer who have not received first-line hormonal therapy in the advanced setting                                                              | 8949   | 12000  | Dranitsaris et al., 2003 (55) |
| Anastrozole - 1 mg daily VERSUS Tamoxifen - 20mg daily IN Postmenopausal women with advanced hormone-sensitive breast cancer who have not received first-line hormonal therapy in the advanced setting                                                              | 14032  | 18000  | Dranitsaris et al., 2003 (55) |

**Appendix**  
**Cost-Utility Analysis of Cancer Prevention, Treatment, and Control: A Systematic Review**  
**Winn et al.**

|                                                                                                                                                                                                                                                       |        |                                   |                             |
|-------------------------------------------------------------------------------------------------------------------------------------------------------------------------------------------------------------------------------------------------------|--------|-----------------------------------|-----------------------------|
| Use of free transverse rectus abdominis myocutaneous (TRAM) flap VERSUS Use of unipedicled TRAM flap IN Postmastectomy reconstruction patients                                                                                                        | 3303   | 4400                              | Thoma et al., 2003 (56)     |
| Treatment with first-line letrozole (with the option of second-line tamoxifen) VERSUS Treatment with first-line tamoxifen (with the option of second-line letrozole) IN Postmenopausal women with advanced breast cancer                              | 121976 | 160000                            | Karnon et al., 2003 (57)    |
| Tamoxifen administration for five years modelled to represent 5 years total of breast cancer prevention VERSUS Placebo administration for five years IN Hypothetical cohort of initially healthy women in Australia at high risk for breast cancer    | 28461  | 42000                             | Eckermann et al., 2003 (58) |
| Tamoxifen administration for five years modelled to represent 10 years total of breast cancer prevention VERSUS Placebo administration for five years IN Hypothetical cohort of initially healthy women in Australia at high risk for breast cancer   | 14393  | 21000                             | Eckermann et al., 2003 (58) |
| Tamoxifen administration for five years modelled to represent no reduced incidence at 10 years ("delayed") VERSUS Placebo administration for five years IN Hypothetical cohort of initially healthy women in Australia at high risk for breast cancer | 148103 | 220000                            | Eckermann et al., 2003 (58) |
| VERSUS IN Women newly diagnosed with metastatic breast cancer - age 65                                                                                                                                                                                | 125100 | 160000                            | Elkin et al., 2004 (59)     |
| VERSUS IN Women newly diagnosed with metastatic breast cancer - age 65                                                                                                                                                                                |        | Increases Costs, Decreases Health | Elkin et al., 2004 (59)     |
| VERSUS IN Women newly diagnosed with metastatic breast cancer - age 65                                                                                                                                                                                |        | Increases Costs, Decreases Health | Elkin et al., 2004 (59)     |
| VERSUS IN Women newly diagnosed with metastatic breast cancer - age 65                                                                                                                                                                                | 103600 | 140000                            | Elkin et al., 2004 (59)     |
| VERSUS IN Women newly diagnosed with metastatic breast cancer - age 65                                                                                                                                                                                |        | Increases Costs, Decreases Health | Elkin et al., 2004 (59)     |

**Appendix**  
**Cost-Utility Analysis of Cancer Prevention, Treatment, and Control: A Systematic Review**  
**Winn et al.**

|                                                                                                                                                                                                                                   |        |                                   |                             |
|-----------------------------------------------------------------------------------------------------------------------------------------------------------------------------------------------------------------------------------|--------|-----------------------------------|-----------------------------|
| VERSUS IN Women newly diagnosed with metastatic breast cancer - age 65                                                                                                                                                            | 131950 | Increases Costs, Decreases Health | Elkin et al., 2004 (59)     |
| Tamoxifen for 5 years VERSUS No treatment IN Women with assumed 5-year breast cancer risk of 3.4% - age 50                                                                                                                        | 43300  | 57000                             | Cykert et al., 2004 (60)    |
| Anastrozole (5 years) plus 4 years follow-up VERSUS Tamoxifen (5 years) plus 4 years follow-up IN Women with estrogen-receptor positive breast cancer who have undergone primary surgery and/or completed chemotherapy - age 64   | 533000 | 700000                            | Hillner et al., 2004 (61)   |
| Anastrozole (5 years) plus 8 years follow-up VERSUS Tamoxifen (5 years) plus 8 years follow-up IN Women with estrogen-receptor positive breast cancer who have undergone primary surgery and/or completed chemotherapy - age 64   | 201800 | 270000                            | Hillner et al., 2004 (61)   |
| Anastrozole (5 years) plus 12 years follow-up VERSUS Tamoxifen (5 years) plus 12 years follow-up IN Women with estrogen-receptor positive breast cancer who have undergone primary surgery and/or completed chemotherapy - age 64 | 111300 | 150000                            | Hillner et al., 2004 (61)   |
| Anastrozole followed by tamoxifen, then megestrol VERSUS Tamoxifen followed by anastrozole, then megestrol IN Postmenopausal women with estrogen receptor positive (ER+) metastatic breast cancer in Italy                        | 12221  | 16000                             | Marchetti et al., 2004 (62) |
| Letrozole followed by tamoxifen, then megestrol VERSUS Tamoxifen followed by anastrozole, then megestrol IN Postmenopausal women with estrogen receptor positive (ER+) metastatic breast cancer in Italy                          | 19116  | 25000                             | Marchetti et al., 2004 (62) |
| Cyclophosphamide, methotrexate and fluorouracil 5FU (CMF) chemotherapy VERSUS No treatment IN Women with node negative early breast cancer - age 65 and 75                                                                        | 30451  | 41000                             | Naeim et al., 2005 (63)     |
| Doxorubicin and cyclophosphamide (AC) chemotherapy VERSUS Cyclophosphamide, methotrexate and fluorouracil 5FU (CMF) chemotherapy IN Women with node negative early breast cancer - age 65 and 75                                  | 46572  | 62000                             | Naeim et al., 2005 (63)     |

**Appendix**  
**Cost-Utility Analysis of Cancer Prevention, Treatment, and Control: A Systematic Review**  
**Winn et al.**

|                                                                                                                                                                                                      |        |             |                              |
|------------------------------------------------------------------------------------------------------------------------------------------------------------------------------------------------------|--------|-------------|------------------------------|
| Breast conserving surgery plus radiation VERSUS Breast conserving surgery alone IN Women with diagnosis of ductal carcinoma in situ of the breast - age 55                                           | 36700  | 48000       | Suh et al., 2005 (64)        |
| Oral ibandronate VERSUS Generic IV pamidronate IN Female breast cancer patients with metastatic bone disease undergoing IV chemotherapy                                                              | -18308 | Cost-Saving | De Cock et al., 2005 (65)    |
| Oral ibandronate VERSUS Zoledronic Acid IN Female breast cancer patients with metastatic bone disease undergoing IV chemotherapy                                                                     | -33209 | Cost-Saving | De Cock et al., 2005 (65)    |
| Proton radiation VERSUS Conventional radiation IN Women with left-sided breast cancer - age 55                                                                                                       | 63341  | 83000       | Lundkvist et al., 2005 (66)  |
| Oral capecitabine plus docetaxel VERSUS Docetaxel alone IN Patients with advanced breast carcinoma - anthracycline pretreated metastatic breast carcinoma (MBC)                                      | 13558  | 18000       | Verma et al., 2005 (67)      |
| Targeting chemotherapy with RT-PCR VERSUS Treatment without RT-PCR IN Patients with lymph-node-negative, estrogen-receptor-positive, early stage breast cancer, classified as intermediate/high risk | 31452  | 39000       | Hornberger et al., 2005 (68) |
| Targeting chemotherapy with RT-PCR VERSUS Treatment without RT-PCR IN Patients with lymph-node-negative, estrogen-receptor-positive, early stage breast cancer, classified as low risk               | -59647 | Cost-Saving | Hornberger et al., 2005 (68) |
| Oral ibandronate VERSUS IV zoledronic acid IN Women with breast cancer and metastatic bone disease who were assumed to be receiving oral hormonal therapy                                            | -27971 | Cost-Saving | De Cock et al., 2005 (69)    |
| Oral ibandronate VERSUS IV Pamidronate IN Women with breast cancer and metastatic bone disease who were assumed to be receiving oral hormonal therapy                                                | -13593 | Cost-Saving | De Cock et al., 2005 (69)    |



**Appendix**  
**Cost-Utility Analysis of Cancer Prevention, Treatment, and Control: A Systematic Review**  
**Winn et al.**

|                                                                                                                                                                              |        |             |                             |
|------------------------------------------------------------------------------------------------------------------------------------------------------------------------------|--------|-------------|-----------------------------|
| Lymph node radiation therapy VERSUS No radiation therapy IN Women after undergoing surgery (mastectomy or tumorectomy with axillary clearance) for breast cancer stage I-III | -40669 | Cost-Saving | Lievens et al., 2005 (70)   |
| Tamoxifen (5 years) VERSUS Tamoxifen plus cyclophosphamide, methotrexate and 5-fluorouracil IN Women with node positive early breast cancer - age 65 and older               | 12890  | 17000       | Naeim et al., 2005 (71)     |
| Home-based physiotherapy intervention VERSUS No intervention IN Breast cancer survivors in Australia                                                                         | 1127   | 1400        | Gordon et al., 2005 (72)    |
| Group-based exercise and psychosocial intervention VERSUS No intervention IN Breast cancer survivors in Australia                                                            | 10663  | 13000       | Gordon et al., 2005 (72)    |
| Proton therapy VERSUS Conventional radiation therapy IN Patients with breast cancer                                                                                          | 32417  | 43000       | Lundkvist et al., 2005 (73) |
| Proton therapy VERSUS Conventional radiation therapy IN Patients with prostate cancer                                                                                        | 25314  | 33000       | Lundkvist et al., 2005 (73) |
| Proton therapy VERSUS Conventional radiation therapy IN Patients with head and neck cancer                                                                                   | 3603   | 4700        | Lundkvist et al., 2005 (73) |
| Proton therapy VERSUS Conventional radiation therapy IN Patients with head and neck cancer                                                                                   | -32731 | Cost-Saving | Lundkvist et al., 2005 (73) |
| Anastrozole (5 years) VERSUS Tamoxifen alone (5 years) IN Post menopausal women with early breast cancer with lymph node negative - age 65                                   | 46991  | 59000       | Lønning et al., 2006 (74)   |
| Tamoxifen (5 years) and letrozole (5 years) VERSUS Tamoxifen alone (5 years) IN Post menopausal women with early breast cancer with lymph node negative - age 65             | 57203  | 72000       | Lønning et al., 2006 (74)   |
| Tamoxifen (2 years) and lexemestane (3 years) VERSUS Tamoxifen alone (5 years) IN Post menopausal women with early breast cancer with lymph node negative - age 65           | 29584  | 37000       | Lønning et al., 2006 (74)   |
| Tamoxifen (3 years) and lexemestane (2 years) VERSUS Tamoxifen alone (5 years) IN Post menopausal women with early breast cancer with lymph node negative - age 65           | 19780  | 25000       | Lønning et al., 2006 (74)   |

**Appendix**  
**Cost-Utility Analysis of Cancer Prevention, Treatment, and Control: A Systematic Review**  
**Winn et al.**

|                                                                                                                                                                   |        |             |                            |
|-------------------------------------------------------------------------------------------------------------------------------------------------------------------|--------|-------------|----------------------------|
| Anastrozole (5 years) VERSUS Tamoxifen alone (5 years) IN Post menopausal women with early breast cancer with lymph node positive - age 65                        | 44435  | 56000       | Lønning et al., 2006 (74)  |
| Tamoxifen (5 years) and letrozole (5 years) VERSUS Tamoxifen alone (5 years) IN Post menopausal women with early breast cancer with lymph node positive - age 65  | 47125  | 59000       | Lønning et al., 2006 (74)  |
| Tamoxifen (2 years) and exemestane (3 years) VERSUS Tamoxifen alone (5 years) IN Post menopausal women with early breast cancer with lymph node positive - age 65 | 26333  | 33000       | Lønning et al., 2006 (74)  |
| Tamoxifen (3 years) and exemestane (2 years) VERSUS Tamoxifen alone (5 years) IN Post menopausal women with early breast cancer with lymph node positive - age 65 | 17663  | 22000       | Lønning et al., 2006 (74)  |
| VERSUS IN Postmenopausal women with early Breast cancer- strogen receptors positive                                                                               | 18950  | 24000       | Karnon et al., 2006 (75)   |
| VERSUS IN Post-menopausal, hormone receptor positive HR+ early breast cancer patients                                                                             | 21550  | 27000       | Rocchi et al., 2006 (76)   |
| VERSUS IN Breast cancer patients with bone metastases and receiving chemotherapy or hormone therapy                                                               | 1070   | 1300        | Botteman et al., 2006 (77) |
| VERSUS IN Breast cancer patients with bone metastases and receiving chemotherapy or hormone therapy                                                               | 4344   | 5400        | Botteman et al., 2006 (77) |
| VERSUS IN Breast cancer patients with bone metastases and receiving chemotherapy or hormone therapy                                                               | -20385 | Cost-Saving | Botteman et al., 2006 (77) |
| VERSUS IN Breast cancer patients with bone metastases and receiving chemotherapy or hormone therapy                                                               | -19779 | Cost-Saving | Botteman et al., 2006 (77) |

**Appendix**  
**Cost-Utility Analysis of Cancer Prevention, Treatment, and Control: A Systematic Review**  
**Winn et al.**

|                                                                                                              |        |        |                                 |
|--------------------------------------------------------------------------------------------------------------|--------|--------|---------------------------------|
| VERSUS IN Patients with BRCA2 Mutation Carriers aged 30-69                                                   | 101000 | 120000 | Plevritis et al., 2006 (78)     |
| VERSUS IN Patients with BRCA1 Mutation Carriers aged 25-69                                                   | 18592  | 23000  | Plevritis et al., 2006 (78)     |
| VERSUS IN Patients with BRCA2 Mutation Carriers aged 25-69                                                   | 28421  | 34000  | Plevritis et al., 2006 (78)     |
| VERSUS IN Patients with BRCA1 Mutation Carriers aged 30-69                                                   | 52675  | 64000  | Plevritis et al., 2006 (78)     |
| VERSUS IN Premenopausal early breast cancer women who had axillary lymph nodes positive                      | 18339  | 23000  | Limwattananon et al., 2006 (79) |
| VERSUS IN Women 40 years old or older                                                                        | 35000  | 48000  | Stout et al., 2006 (80)         |
| VERSUS IN Women 40 years old or older                                                                        | 28000  | 38000  | Stout et al., 2006 (80)         |
| VERSUS IN Women 40 years old or older                                                                        | 35000  | 48000  | Stout et al., 2006 (80)         |
| VERSUS IN Women 40 years old or older                                                                        | 34000  | 47000  | Stout et al., 2006 (80)         |
| VERSUS IN Women 40 years old or older                                                                        | 47000  | 65000  | Stout et al., 2006 (80)         |
| VERSUS IN Women 40 years old or older                                                                        | 49000  | 67000  | Stout et al., 2006 (80)         |
| VERSUS IN Women 40 years old or older                                                                        | 46667  | 64000  | Stout et al., 2006 (80)         |
| VERSUS IN Women 40 years old or older                                                                        | 27000  | 37000  | Stout et al., 2006 (80)         |
| VERSUS IN Spanish postmenopausal women diagnosed with strogen receptor positive OBC- (20 years time horizon) | 61519  | 77000  | Gil et al., 2006 (81)           |

**Appendix**  
**Cost-Utility Analysis of Cancer Prevention, Treatment, and Control: A Systematic Review**  
**Winn et al.**

|                                                                                                                                                      |        |             |                             |
|------------------------------------------------------------------------------------------------------------------------------------------------------|--------|-------------|-----------------------------|
| VERSUS IN Spanish postmenopausal women diagnosed with strogen receptor positive OBC- (study: IES 2005)(20 years time horizon)                        | 43995  | 55000       | Gil et al., 2006 (81)       |
| VERSUS IN Spanish postmenopausal women diagnosed with strogen receptor positive OBC- (20 years time horizon)                                         | 77710  | 97000       | Gil et al., 2006 (81)       |
| VERSUS IN Spanish postmenopausal women diagnosed with strogen receptor positive OBC- (based on IES 2004)(20 years time horizon)                      | 35883  | 45000       | Gil et al., 2006 (81)       |
| VERSUS IN Breast cancer patient in adjuvant chemotherapy                                                                                             | 386301 | 480000      | Fagnoni et al., 2006 (82)   |
| VERSUS IN Post-menopausal women with early breast cancer and estrogen or progesterone receptor positive tumor who had completed 5 years of tamoxifen | 28728  | 36000       | Delea et al., 2006 (83)     |
| VERSUS IN Patients with hormone receptor positive (HR1) early breast cancer (EBC).                                                                   | 4923   | 6200        | Moeremans et al., 2006 (84) |
| VERSUS IN Patients with clinically node-negative breast cancer undergoing sentinel lymph node biopsy - tumor stage 2                                 | 5600   | 6800        | Jeruss et al., 2006 (85)    |
| VERSUS IN Patients with clinically node-negative breast cancer undergoing sentinel lymph node biopsy - tumor stage 3                                 | -1500  | Cost-Saving | Jeruss et al., 2006 (85)    |
| VERSUS IN Patients with clinically node-negative breast cancer undergoing sentinel lymph node biopsy - tumor stage 4                                 | -4450  | Cost-Saving | Jeruss et al., 2006 (85)    |

**Appendix**  
**Cost-Utility Analysis of Cancer Prevention, Treatment, and Control: A Systematic Review**  
**Winn et al.**

|                                                                                                                                                                                       |         |                                   |                              |
|---------------------------------------------------------------------------------------------------------------------------------------------------------------------------------------|---------|-----------------------------------|------------------------------|
| VERSUS IN Patients with clinically node-negative breast cancer undergoing sentinel lymph node biopsy - tumor stage 1                                                                  | 10967   | 13000                             | Jeruss et al., 2006 (85)     |
| VERSUS IN 62 year old women with early breast cancer with 100% node-positive                                                                                                          | 29642   | 37000                             | El Ouagari et al., 2007 (86) |
| VERSUS IN 62 year old women with early breast cancer with 100% node-negative                                                                                                          | 35441   | 44000                             | El Ouagari et al., 2007 (86) |
| VERSUS IN 62 year old women with early breast cancer with 50% node-positive, 50% node-negative                                                                                        | 35734   | 45000                             | El Ouagari et al., 2007 (86) |
| VERSUS IN Post menopausal women with early stage breast cancer                                                                                                                        | 22814   | 28000                             | Skedgel et al., 2007 (87)    |
| VERSUS IN Post menopausal women with early stage breast cancer                                                                                                                        | -235829 | Increases Costs, Decreases Health | Skedgel et al., 2007 (87)    |
| VERSUS IN Post menopausal women with early stage breast cancer                                                                                                                        | 6346    | 7700                              | Skedgel et al., 2007 (87)    |
| VERSUS IN Postmenopausal women age 64 years who had received 2-3 years of tamoxifen therapy following primary treatment of early-stage breast cancer                                  | 25343   | 31000                             | Lundkvist et al., 2007 (88)  |
| Upfront Anastrozole 1mg daily for 5 years VERSUS Tamoxifen alone 20mg daily for 5 years IN Post-menopausal women with early breast cancer in Belgium                                  | 24875   | 30000                             | Skedgel et al., 2007 (89)    |
| Sequential Tamoxifen- AI (Exemestane 25mg daily) for 2.5 years each VERSUS Tamoxifen alone 20mg daily for 5 years IN Post-menopausal women with early breast cancer in Belgium        | 6194    | 7500                              | Skedgel et al., 2007 (89)    |
| Tamoxifen daily for 5 years followed by Letrozole 2.5mg daily for 3 years. VERSUS Tamoxifen alone 20mg daily for 5 years IN Post-menopausal women with early breast cancer in Belgium | 13108   | 16000                             | Skedgel et al., 2007 (89)    |
| Upfront Anastrozole 1mg daily for 5 years VERSUS Tamoxifen daily for 5 years followed by Letrozole 2.5mg daily for 3 years IN Post-menopausal                                         | 46450   | 56000                             | Skedgel et al., 2007 (89)    |

**Appendix**  
**Cost-Utility Analysis of Cancer Prevention, Treatment, and Control: A Systematic Review**  
**Winn et al.**

| women with early breast cancer in Belgium                                                                                                                                                                                                                                                             |          |                                      |                            |
|-------------------------------------------------------------------------------------------------------------------------------------------------------------------------------------------------------------------------------------------------------------------------------------------------------|----------|--------------------------------------|----------------------------|
| Sequential Tamoxifen- AI (Exemestane 25mg daily) for 2.5 years each VERSUS Tamoxifen daily for 5 years followed by Letrozole 2.5mg daily for 3 years IN Post-menopausal women with early breast cancer in Belgium                                                                                     | -39491   | Cost-Saving                          | Skedgel et al., 2007 (89)  |
| Upfront Anastrozole 1 mg /daily VERSUS Sequential Tamoxifen- AI (Exemestane 25mg daily) for 2.5 years each IN Post-menopausal women with early breast cancer in Belgium                                                                                                                               | -2095048 | Increases Costs,<br>Decreases Health | Skedgel et al., 2007 (89)  |
| Five years treatment with anastrozole VERSUS Five years treatment with tamoxifen IN Postmenopausal women age 64 with early (invasive, operable) breast cancer who had completed primary therapy (surgery and/or radiotherapy and/or chemotherapy) and who were eligible for adjuvant hormonal therapy | 20246    | 25000                                | Locker et al., 2007 (90)   |
| Adjuvant chemotherapy plus trastuzumab VERSUS Chemotherapy alone IN Patients with HER2-positive early breast cancer, from Italian health care system                                                                                                                                                  | 14861    | 18000                                | Liberato et al., 2007 (91) |
| Adjuvant chemotherapy plus trastuzumab VERSUS Chemotherapy alone IN Patients with HER2-positive early breast cancer, from the United States health care system                                                                                                                                        | 18970    | 23000                                | Liberato et al., 2007 (91) |
| Anthracycline-based adjuvant trastuzumab therapy (AAT) VERSUS Nontrastuzumab (NT) therapy IN 49-year-old women with HER2/neu-positive early-stage breast cancer                                                                                                                                       | 39892    | 48000                                | Kurian et al., 2007 (92)   |
| Nonanthracycline-based adjuvant trastuzumab therapy ( NAT) VERSUS Nontrastuzumab (NT) therapy IN 49-year-old women with HER2/neu-positive early-stage breast cancer                                                                                                                                   | 58041    | 70000                                | Kurian et al., 2007 (92)   |
| Nonanthracycline-based adjuvant trastuzumab therapy ( NAT) VERSUS Anthracycline-based adjuvant trastuzumab therapy ( AAT) IN 49-year-old women with HER2/neu-positive early-stage breast cancer                                                                                                       | -102931  | Increases Costs,<br>Decreases Health | Kurian et al., 2007 (92)   |

**Appendix**  
**Cost-Utility Analysis of Cancer Prevention, Treatment, and Control: A Systematic Review**  
**Winn et al.**

|                                                                                                                                                                                                                                            |       |       |                              |
|--------------------------------------------------------------------------------------------------------------------------------------------------------------------------------------------------------------------------------------------|-------|-------|------------------------------|
| Mammogram VERSUS No screening IN British women aged 30-49 with BRCA1 mutation                                                                                                                                                              | 9659  | 11000 | Norman et al., 2007 (93)     |
| MRI VERSUS Mammogram IN British women aged 30-49 with BRCA1 mutation                                                                                                                                                                       | 24652 | 29000 | Norman et al., 2007 (93)     |
| MRI and mammography VERSUS MRI IN British women aged 30-49 with BRCA1 mutation                                                                                                                                                             | 27896 | 33000 | Norman et al., 2007 (93)     |
| MRI and mammography VERSUS MRI IN British women aged 40 - 49 with BRCA1 mutation                                                                                                                                                           | 12187 | 14000 | Norman et al., 2007 (93)     |
| MRI VERSUS Mammography IN British women aged 40 - 49 with BRCA1 mutation                                                                                                                                                                   | 15070 | 18000 | Norman et al., 2007 (93)     |
| Mammography VERSUS No screening IN British women aged 40 - 49 with BRCA1 mutation                                                                                                                                                          | 5370  | 6300  | Norman et al., 2007 (93)     |
| FEC100 regimen, six cycles, 3-weekly basis, followed by trastuzumab 3-weekly, 17 cycles. VERSUS FEC100 regimen, six cycles, 3-weekly basis IN Patients with early breast cancer patients that overexpress HER2                             | 47566 | 56000 | Norum et al., 2007 (94)      |
| Adjuvant chemotherapy with trastuzumab, 52 week course VERSUS Usual care IN 50-year-old patients with human epidermal growth factor receptor 2 protein (HER2)-positive breast cancer                                                       | 17384 | 21000 | Millar et al., 2007 (95)     |
| Adjuvant chemotherapy with trastuzumab, 9 week course VERSUS Usual care IN 50-year-old patients with human epidermal growth factor receptor 2 protein (HER2)-positive breast cancer                                                        | 1297  | 1600  | Millar et al., 2007 (95)     |
| Initial adjuvant treatment with Letrozole VERSUS Initial adjuvant treatment with Tamoxifen IN Postmenopausal women with hormone receptor-positive early breast cancer                                                                      | 23743 | 29000 | Delea et al., 2007 (96)      |
| Adjuvant exemestane for 2.5 years after 2.5 years of tamoxifen treatment VERSUS Continued tamoxifen for 5 years IN 64 years old Canadian postmenopausal women with ER positive primary breast cancer or unknown ER status                  | 18614 | 23000 | Risebrough et al., 2007 (97) |
| Doxorubicin and cyclophosphamide chemotherapy with adjuvant trastuzumab monotherapy VERSUS Doxorubicin and cyclophosphamide chemotherapy alone followed by paclitaxel IN 50 year old US women with early stage HER2-Positive breast cancer | 27637 | 34000 | Garrison et al., 2007 (98)   |

**Appendix**  
**Cost-Utility Analysis of Cancer Prevention, Treatment, and Control: A Systematic Review**  
**Winn et al.**

|                                                                                                                                                                                                                                                                  |        |        |                                            |                                |
|------------------------------------------------------------------------------------------------------------------------------------------------------------------------------------------------------------------------------------------------------------------|--------|--------|--------------------------------------------|--------------------------------|
| Biennial mammography screening VERSUS No mammography screening<br>IN Hong Kong Women aged 50-69 Years old                                                                                                                                                        |        |        | Increases<br>Costs,<br>Decreases<br>Health | Wong et al.,<br>2007 (99)      |
| Biennial mammography screening VERSUS No mammography screening<br>IN Hong Kong Women aged 50-79 Years old                                                                                                                                                        |        |        | Increases<br>Costs,<br>Decreases<br>Health | Wong et al.,<br>2007 (99)      |
| Biennial mammography screening VERSUS No mammography screening<br>IN Hong Kong Women aged 40-69 Years old                                                                                                                                                        | 61600  | 75000  |                                            | Wong et al.,<br>2007 (99)      |
| Biennial mammography screening VERSUS No mammography screening<br>IN Hong Kong Women aged 40-79 Years old                                                                                                                                                        | 178800 | 220000 |                                            | Wong et al.,<br>2007 (99)      |
| Anastrozole VERSUS Tamoxifen IN Postmenopausal women with early<br>(invasive, operable) breast cancer                                                                                                                                                            | 32363  | 41000  |                                            | Mansel et al.,<br>2007 (100)   |
| Switching to exemestane after 2 to 3 years tamoxifen therapy VERSUS<br>IN US post-menopausal women with early stage breast cancer; estrogen-<br>receptor positive and estrogen receptor status unknown                                                           | 20100  | 25000  |                                            | Thompson et<br>al., 2007 (101) |
| Switching to exemestane after 2 to 3 years tamoxifen therapy VERSUS<br>Exclusively tamoxifen therapy IN US aged 60-70 post-menopausal<br>women with early stage breast cancer; estrogen-receptor positive and<br>estrogen receptor status known                  | 16600  | 21000  |                                            | Thompson et<br>al., 2007 (101) |
| Ajuvant 5-fluorouracil , epirubicin and cyclophosphamide-docetaxel<br>VERSUS Ajuvant 5-fluorouracil , epirubicin at 100 mg/m2 and<br>cyclophosphamide IN Women who underwent adjuvant chemotherapy<br>following surgical treatment of non-positive breast cancer | 12889  | 15000  |                                            | Younis et al.,<br>2007 (102)   |
| VERSUS IN Patients with lymph node negative, estrogen receptor<br>positive early-stage breast cancer                                                                                                                                                             | 11276  | 14000  |                                            | Kondo et al.,<br>2007 (103)    |
| VERSUS IN Patients with lymph node negative, estrogen receptor<br>positive early-stage breast cancer                                                                                                                                                             | 27278  | 33000  |                                            | Kondo et al.,<br>2007 (103)    |



**Appendix**  
**Cost-Utility Analysis of Cancer Prevention, Treatment, and Control: A Systematic Review**  
**Winn et al.**

|                                                                                                                                                                                                                                                                                                                                                                                |       |       |                            |
|--------------------------------------------------------------------------------------------------------------------------------------------------------------------------------------------------------------------------------------------------------------------------------------------------------------------------------------------------------------------------------|-------|-------|----------------------------|
| Adjuvant treatment with Letrozole VERSUS Adjuvant treatment with Tamoxifen IN Estrogen-receptor positive postmenopausal women with early invasive breast cancer who have undergone primary surgery and are starting adjuvant therapy                                                                                                                                           | 18894 | 23000 | Karnon et al., 2008 (104)  |
| Adjuvant treatment with Anastrozole VERSUS Adjuvant treatment with Tamoxifen IN Estrogen-receptor positive postmenopausal women with early invasive breast cancer who have undergone primary surgery and are starting adjuvant therapy                                                                                                                                         | 20803 | 25000 | Karnon et al., 2008 (104)  |
| Adjuvant therapy with letrozole VERSUS Adjuvant therapy with tamoxifen IN Postmenopausal women with HR+ early breast cancer aged 60 years at initiation of therapy                                                                                                                                                                                                             | 19544 | 24000 | Delea et al., 2008 (105)   |
| Immunohistochemical (IHC) test: 1-year adjuvant trastuzumab for IHC +3 patients; standard care for all other patients VERSUS Standard care IN 55 year old female with early breast cancer completely excised and after 4 cycles of chemotherapy                                                                                                                                | 47572 | 58000 | Lidgren et al., 2008 (106) |
| Immunohistochemical (IHC) test: 1-year adjuvant trastuzumab for IHC +2 and +3 patients; standard care for all other patients VERSUS Standard care IN Early breast cancer patients                                                                                                                                                                                              | 66951 | 81000 | Lidgren et al., 2008 (106) |
| Immunohistochemical (IHC) test, FISH confirmation for IHC +2 and +3 patients: 1-year adjuvant trastuzumab for FISH+ patients; standard care for all other patients VERSUS Standard care for all patients IN 55 year old female with early breast cancer completely excised and after 4 cycles of chemotherapy                                                                  | 44784 | 54000 | Lidgren et al., 2008 (106) |
| FISH test: 1-year adjuvant trastuzumab for FISH+ patients; standard care for all other patients VERSUS Immunohistochemical (IHC) test, FISH confirmation for IHC +2 and +3 patients: 1-year adjuvant trastuzumab for FISH+ patients; standard care for all other patients IN 55 year old female with early breast cancer completely excised and after 4 cycles of chemotherapy | 51626 | 63000 | Lidgren et al., 2008 (106) |

**Appendix**  
**Cost-Utility Analysis of Cancer Prevention, Treatment, and Control: A Systematic Review**  
**Winn et al.**

|                                                                                                                                                                                                                                |        |                                      |                             |
|--------------------------------------------------------------------------------------------------------------------------------------------------------------------------------------------------------------------------------|--------|--------------------------------------|-----------------------------|
| All-digital mammography screening VERSUS All film mammography screening IN United States women age 40 years or older                                                                                                           | 331000 | 400000                               | Tosteson et al., 2008 (107) |
| All-digital mammography screening, Age-targeted digital imaging IN United States women age 40 years or older                                                                                                                   | 26500  | 32000                                | Tosteson et al., 2008 (107) |
| All-digital mammography screening VERSUS Film imagine for breast cancer IN United States women age 40 years or older                                                                                                           | 830000 | 1000000                              | Tosteson et al., 2008 (107) |
| All-digital mammography screening VERSUS All film screening IN United States women age 65 years or older                                                                                                                       |        | Increases Costs,<br>Decreases Health | Tosteson et al., 2008 (107) |
| Density-targeted mammography screening VERSUS Film imaging for breast cancer IN United States women age 65 years or older                                                                                                      | 97000  | 120000                               | Tosteson et al., 2008 (107) |
| Density-targeted screening VERSUS All film screening IN United States women age 65 years or older, alternative case scenario                                                                                                   | 62000  | 75000                                | Tosteson et al., 2008 (107) |
| All-digital mammography screening VERSUS All film screening IN United States women age 65 years or older, alternative case scenario                                                                                            | -66000 | Increases Costs,<br>Decreases Health | Tosteson et al., 2008 (107) |
| Docetaxel, doxorubicin, cyclophosphamide(TAC) VERSUS Fluorouracil, doxorubicin, cyclophosphamide(FAC) IN women with node-positive early breast cancer(EBC) in the United Kingdom, treated for the first time with chemotherapy | 33109  | 40000                                | Wolowacz et al., 2008 (108) |
| Breast cancer screening 3 times a year in women aged 40-80 years VERSUS Breast cancer screening 3 times a year in women aged 40-75 years IN 40- year-old Slovenian women                                                       | 52011  | 65000                                | Rojnik et al., 2008 (109)   |
| High dose chemotherapy VERSUS Standard chemotherapy IN Nonmetastatic breast cancer women with more than 7 involved axillary lymph nodes, younger than 60 years of age and a World Health Organization performance status <= 2  | 20307  | 29000                                | Marino et al., 2008 (110)   |

**Appendix**  
**Cost-Utility Analysis of Cancer Prevention, Treatment, and Control: A Systematic Review**  
**Winn et al.**

|                                                                                                                                                                                                                                                                                                                                                  |               |                 |                            |
|--------------------------------------------------------------------------------------------------------------------------------------------------------------------------------------------------------------------------------------------------------------------------------------------------------------------------------------------------|---------------|-----------------|----------------------------|
| 50mg doxorubicin/m <sup>2</sup> of body-surface area, 500mg cyclophosphamide/m <sup>2</sup> , 75mg docetaxel/m <sup>2</sup> VERSUS 50mg doxorubicin/m <sup>2</sup> of body-surface area, 500mg cyclophosphamide/m <sup>2</sup> , 500mg fluorouracil/m <sup>2</sup> IN Women with node positive breast cancer in Korea, following primary surgery | 8682          | 11000           | Lee et al., 2008 (111)     |
| Docetaxel, doxorubicin, and cyclophosphamide (TAC) adjuvant chemotherapy VERSUS 5-fluorouracil, doxorubicin, and cyclophosphamide (FAC) adjuvant chemotherapy IN Node-positive breast cancer women                                                                                                                                               | 11787         | 16000           | Au et al., 2008 (112)      |
| IHC test, with FISH confirmation for 2+ and 3+ patients, trastuzumab and chemotherapy for FISH+ patients; chemotherapy alone for all other patients VERSUS Chemotherapy alone for all patients IN 65-year old Swedish metastatic breast cancer patients                                                                                          | 65133         | 79000           | Lidgren et al., 2008 (113) |
| FISH test, with trastuzumab and chemotherapy for FISH+ patients; chemotherapy alone for all other patients VERSUS IHC test, with FISH confirmation for 2+ and 3+ patients, trastuzumab and chemotherapy for FISH+ patients; chemotherapy alone for all other patients IN 65-year old Swedish metastatic breast cancer patients                   | 75361         | 91000           | Lidgren et al., 2008 (113) |
| IHC test, with FISH confirmation for 2+ and 3+ patients, trastuzumab and chemotherapy for FISH+ patients; chemotherapy alone for all other patients VERSUS IHC test, trastuzumab and chemotherapy for IHC 2+ and 3+ patients; chemotherapy alone for all other patients IN 65-year old Swedish metastatic breast cancer patients                 | -<br>29135708 | Cost-<br>Saving | Lidgren et al., 2008 (113) |
| Testing for BRCA 1/2 mutation VERSUS No testing, usual care IN US women aged at least 35 years old with an associated family risk of breast and/or ovarian cancer or whom are concerned about having a BRCA 1/2 mutation.                                                                                                                        | 5000          | 5900            | Holland et al., 2008 (114) |

**Appendix**  
**Cost-Utility Analysis of Cancer Prevention, Treatment, and Control: A Systematic Review**  
**Winn et al.**

|                                                                                                                                                                                                                                                  |         |                                   |                             |
|--------------------------------------------------------------------------------------------------------------------------------------------------------------------------------------------------------------------------------------------------|---------|-----------------------------------|-----------------------------|
| Primary prophylaxis with pegfilgrastim VERSUS Secondary prophylaxis with pegfilgrastim IN US women 30-80 years old with early (stage I-II) breast cancer receiving myelosuppressive chemotherapy with at least a 20% risk of febrile neutropenia | 116000  | 140000                            | Ramsey et al., 2008 (115)   |
| Tamoxifen VERSUS No tamoxifen IN Women aged 50 and above without a uterus                                                                                                                                                                        | 72531   | 85000                             | Melnikow et al., 2008 (116) |
| Tamoxifen VERSUS No tamoxifen IN Women aged 50 and over with estimated 5-year breast cancer risk $\geq$ 1.67 %                                                                                                                                   | -227320 | Increases Costs, Decreases Health | Melnikow et al., 2008 (116) |
| Tamoxifen VERSUS No tamoxifen IN Women aged 50 and over with estimated 5-year breast cancer risk $\geq$ 1.67 %                                                                                                                                   | 300030  | 350000                            | Melnikow et al., 2008 (116) |
| Tamoxifen VERSUS No tamoxifen IN Women aged 50 and over with estimated 5-year breast cancer risk $\geq$ 1.67 %                                                                                                                                   | -5712   | Increases Costs, Decreases Health | Melnikow et al., 2008 (116) |
| Tamoxifen VERSUS No tamoxifen IN Women aged 50 and over with estimated 5-year breast cancer risk $\geq$ 1.67 %                                                                                                                                   | -5771   | Increases Costs, Decreases Health | Melnikow et al., 2008 (116) |
| Tamoxifen VERSUS No tamoxifen IN Women aged 50 and over with estimated 5-year breast cancer risk $\geq$ 3 %                                                                                                                                      | 57935   | 68000                             | Melnikow et al., 2008 (116) |
| Tamoxifen VERSUS No tamoxifen IN Women aged 50 and over with estimated 5-year breast cancer risk $\geq$ 3 %                                                                                                                                      | 37365   | 44000                             | Melnikow et al., 2008 (116) |
| Tamoxifen VERSUS No tamoxifen IN Women aged 50 and over with estimated 5-year breast cancer risk $\geq$ 3 %                                                                                                                                      | 167718  | 200000                            | Melnikow et al., 2008 (116) |

**Appendix**  
**Cost-Utility Analysis of Cancer Prevention, Treatment, and Control: A Systematic Review**  
**Winn et al.**

|                                                                                                                                                                                                                                                                                                                                        |        |                                      |                                  |
|----------------------------------------------------------------------------------------------------------------------------------------------------------------------------------------------------------------------------------------------------------------------------------------------------------------------------------------|--------|--------------------------------------|----------------------------------|
| Tamoxifen VERSUS No tamoxifen IN Women aged 50 and over with estimated 5-year breast cancer risk >= 3 %                                                                                                                                                                                                                                | 68262  | 80000                                | Melnikow et al., 2008 (116)      |
| Tamoxifen VERSUS No tamoxifen IN Women aged 50 and over with estimated 5-year breast cancer risk >= 3 %                                                                                                                                                                                                                                | -5599  | Increases Costs,<br>Decreases Health | Melnikow et al., 2008 (116)      |
| Tamoxifen VERSUS No tamoxifen IN Women aged 50 and over with estimated 5-year breast cancer risk >= 3 %                                                                                                                                                                                                                                | -5658  | Increases Costs,<br>Decreases Health | Melnikow et al., 2008 (116)      |
| Tamoxifen VERSUS No tamoxifen IN Women aged 50 and above with a uterus                                                                                                                                                                                                                                                                 | 190850 | 220000                               | Melnikow et al., 2008 (116)      |
| Magnetic resonance (MR) lymphangiography VERSUS No treatment IN 61 year old women with clinically node negative early breast cancer who chose breast conserving surgery with radiation therapy; cancer is: 1-2 cm, grade I, estrogen and progesterone receptor positive, and HER2/neu negative                                         | 37244  | 44000                                | Pandharipande et al., 2008 (117) |
| Magnetic resonance lymphangiography and sentinel lymph node biopsy VERSUS Sentinel lymph node biopsy IN 61 year old women with clinically node negative early breast cancer who chose breast conserving surgery with radiation therapy; cancer is: 1-2 cm, grade I, estrogen and progesterone receptor positive, and HER2/neu negative | 93333  | 110000                               | Pandharipande et al., 2008 (117) |
| External beam partial breast irradiation (EB-PBI) VERSUS Whole breast radiation therapy (WBRT) IN 55 year old United States postmenopausal women with stage I breast cancer that is estrogen receptor positive                                                                                                                         | 630000 | 790000                               | Sher et al., 2008 (118)          |

**Appendix**  
**Cost-Utility Analysis of Cancer Prevention, Treatment, and Control: A Systematic Review**  
**Winn et al.**

|                                                                                                                                                                                                                                                                                                                                                                                                       |        |                                      |                                |
|-------------------------------------------------------------------------------------------------------------------------------------------------------------------------------------------------------------------------------------------------------------------------------------------------------------------------------------------------------------------------------------------------------|--------|--------------------------------------|--------------------------------|
| MammoSite partial breast irradiation (MS-PBI) VERSUS Whole breast radiation therapy (WBRT) IN 55 year old United States postmenopausal women with stage I breast cancer that is estrogen receptor positive                                                                                                                                                                                            |        | Increases Costs,<br>Decreases Health | Sher et al., 2008 (118)        |
| Hormone therapy for advanced breast cancer: anastrozole/letrozole, fulvestrant, exemestane, docetaxel, capecitabine, and best supportive care VERSUS Hormone therapy for advanced breast cancer: anastrozole, exemestane, docetaxel, capecitabine, and best supportive care IN United Kingdom women with hormone receptor positive advanced breast cancer, previously treated with adjuvant Tamoxifen | 13289  | 16000                                | Cameron et al., 2008 (119)     |
| Hormone therapy for advanced breast cancer: anastrozole/letrozole, fulvestrant, exemestane, docetaxel, capecitabine, and best supportive care VERSUS Hormone therapy for advanced breast cancer: anastrozole, exemestane, docetaxel, capecitabine, and best supportive care IN United Kingdom women with hormone receptor positive advanced breast cancer previously treated with adjuvant Tamoxifen  | -18709 | Cost-Saving                          | Cameron et al., 2008 (119)     |
| Nab-paclitaxel (260 mg/m <sup>2</sup> q3wk) VERSUS Paclitaxel (175 mg/m <sup>2</sup> q3wk) IN Patients with metastatic breast cancer in Canada                                                                                                                                                                                                                                                        | 50101  | 59000                                | Dranitsaris et al., 2008 (120) |
| Docetaxel (100 mg/m <sup>2</sup> q3wk) VERSUS Paclitaxel (175 mg/m <sup>2</sup> q3wk) IN Patients with metastatic breast cancer in Canada                                                                                                                                                                                                                                                             | 652365 | 770000                               | Dranitsaris et al., 2008 (120) |
| Superficial inferior epigastric artery (SIEA) flap in postmastectomy reconstruction VERSUS Deep inferior epigastric perforator (DIEP) flap in postmastectomy reconstruction IN Adult women undergoing postmastectomy reconstruction for breast cancer in Canada                                                                                                                                       | 68     | 80                                   | Thoma et al., 2008 (121)       |
| Lapatinib + Capecitabine (150-mg capecitabine tablet Capecitabine + 250-mg lapatinib tablet) VERSUS Capecitabine (150-mg tablet) IN HER-2 positive women within the US healthcare system diagnosed with advanced breast cancer                                                                                                                                                                        | 163583 | 190000                               | Le et al., 2009 (122)          |
| Fulvestrant as an adjuvant therapy for advanced breast cancer VERSUS Usual care chemotherapy to treat advanced breast cancer IN Women with advanced breast cancer within the German healthcare system.                                                                                                                                                                                                | -36823 | Cost-Saving                          | Lux et al., 2009 (123)         |

**Appendix**  
**Cost-Utility Analysis of Cancer Prevention, Treatment, and Control: A Systematic Review**  
**Winn et al.**

|                                                                                                                                                                                                                                                                                                                                                                                                                                                                                                                                                                                                                              |        |        |                                   |
|------------------------------------------------------------------------------------------------------------------------------------------------------------------------------------------------------------------------------------------------------------------------------------------------------------------------------------------------------------------------------------------------------------------------------------------------------------------------------------------------------------------------------------------------------------------------------------------------------------------------------|--------|--------|-----------------------------------|
| MRI (Magnetic Resonance Imaging) screening for malignant breast tumors VERSUS Mammography screening for malignant breast tumors IN Women within the United States healthcare system with a high-risk for breast cancer. Women at increased risk of breast cancer include those with (i) a history of thoracic or mantle irradiation, (ii) a strong family history or genetic predisposition, (iii) lobular carcinoma in situ or atypical hyperplasia, (iv) a prior history of breast cancer, and/or (v) those over 35 years of age with a 5-year risk of invasive breast cancer = 1.7% according to the modified Gail Model. | 134070 | 160000 | Moore et al., 2009 (124)          |
| Bevacizumab, 10 mg/kg body weight + Paclitaxel, 90 mg/m <sup>2</sup> body surface-area VERSUS Paclitaxel, 90 mg/m <sup>2</sup> body surface-area IN Women positively diagnosed with metastatic breast cancer; HER-2 negative genotype                                                                                                                                                                                                                                                                                                                                                                                        | 278943 | 310000 | Dedes et al., 2009 (125)          |
| TAC: Docetaxel 75 mg/m <sup>2</sup> + doxorubicin 50 mg/m <sup>2</sup> + cyclophosphamide 500 mg/m <sup>2</sup> (as one administration per cycle for 6 cycles of 21 days) VERSUS FAC: 5-FU 500 mg/m <sup>2</sup> + doxorubicin 50 mg/m <sup>2</sup> + cyclophosphamide 500 mg/m <sup>2</sup> (as one administration per cycle for 6 cycles of 21 days) IN Spanish women with operable, positive-node, breast cancer and no relapse                                                                                                                                                                                           | 3275   | 4000   | Martín-Jiménez et al., 2009 (126) |
| Magnetic resonance imaging of breast tissue with adjuvant x-ray mammograph VERSUS X-ray mammograph IN US Women with BRCA 1/2 at high risk for breast cancer                                                                                                                                                                                                                                                                                                                                                                                                                                                                  | 25277  | 31000  | Taneja et al., 2009 (127)         |
| Biennial mammography and annual Clinical breast exam from ages 40 to 79 years VERSUS Mammography, with or without clinical breast exam, 2 years for women ages 40 years and older IN US women aged 40 to 79 years old                                                                                                                                                                                                                                                                                                                                                                                                        | 90100  | 110000 | Ahern et al., 2009 (128)          |

**Appendix**  
**Cost-Utility Analysis of Cancer Prevention, Treatment, and Control: A Systematic Review**  
**Winn et al.**

|                                                                                                                                                                                                                                                                                                                                                                                                               |         |         |                                   |
|---------------------------------------------------------------------------------------------------------------------------------------------------------------------------------------------------------------------------------------------------------------------------------------------------------------------------------------------------------------------------------------------------------------|---------|---------|-----------------------------------|
| Annual mammography for women aged 40-59, biannual mammography for women aged 60-76, annual clinical breast exam for women aged 40-79 VERSUS Biennial mammography and annual clinical breast exam from ages 40 to 79 years IN US women aged 40 to 79 years old                                                                                                                                                 | 169500  | 210000  | Ahern et al., 2009 (128)          |
| Annual mammography and clinical breast exam for women aged 40-79 VERSUS Annual mammography for women aged 40-59, biannual mammography for women aged 60-76, annual clinical breast exam for women aged 40-79, with usual care for breast cancer following positive diagnosis IN US women aged 40 to 79 years old                                                                                              | 428571  | 540000  | Ahern et al., 2009 (128)          |
| Annual mammography and clinical breast exam for women aged 40-79, triannual clinical breast exam for women aged 20-39 VERSUS Annual mammography and clinical breast exam for women aged 40-79 IN US women aged 40 to 79 years old                                                                                                                                                                             | 6111111 | 7700000 | Ahern et al., 2009 (128)          |
| Mammography, with or without clinical breast exam, 2 years for women ages 40 years and older VERSUS No screening, usual care for breast cancer following positive diagnosis IN US women aged 40 to 79 years old                                                                                                                                                                                               | 28011   | 35000   | Ahern et al., 2009 (128)          |
| Annual breast cancer screening comprising mammography and clinical examination VERSUS No annual screening IN UK women with a family history of breast cancer or presence of BRCA1 or BRCA2 genes average age 48                                                                                                                                                                                               | 9610    | 11000   | Reis et al., 2009 (129)           |
| Ixabepilone plus capecitabine: 40 mg/m <sup>2</sup> on day 1 plus capecitabine 2,000mg/m <sup>2</sup> per day for the first 14 days of each 21-day cycle VERSUS Capecitabine alone: 2,500 mg/m <sup>2</sup> per day for the first 14 days of each 21-day cycle IN Metastatic breast cancer patients previously determined to be taxane-resistant and previously treated with or resistant to an anthracycline | 359000  | 390000  | Reed et al., 2009 (130)           |
| Trastuzumab adjuvant therapy VERSUS No Trastuzumab adjuvant therapy IN Women (age 50-59) with metastatic human epidermal growth factor receptor 2 (HER2) positive breast cancer                                                                                                                                                                                                                               | 10411   | 13000   | Van Vlaenderen et al., 2009 (131) |



**Appendix**  
**Cost-Utility Analysis of Cancer Prevention, Treatment, and Control: A Systematic Review**  
**Winn et al.**

|                                                                                                                                                                                                 |         |             |                                   |
|-------------------------------------------------------------------------------------------------------------------------------------------------------------------------------------------------|---------|-------------|-----------------------------------|
| Trastuzumab adjuvant therapy VERSUS No Trastuzumab adjuvant therapy IN Women (age 60-69) with metastatic human epidermal growth factor receptor 2 (HER2) positive breast cancer                 | 15365   | 19000       | Van Vlaenderen et al., 2009 (131) |
| Trastuzumab adjuvant therapy VERSUS No Trastuzumab adjuvant therapy IN Women (age 70-79) with metastatic human epidermal growth factor receptor 2 (HER2) positive breast cancer                 | 31118   | 38000       | Van Vlaenderen et al., 2009 (131) |
| Trastuzumab adjuvant therapy VERSUS No Trastuzumab adjuvant therapy IN Women (age >80) with metastatic human epidermal growth factor receptor 2 (HER2) positive breast cancer                   | 119694  | 150000      | Van Vlaenderen et al., 2009 (131) |
| Trastuzumab adjuvant therapy VERSUS No Trastuzumab adjuvant therapy IN Women (age <50) with metastatic human epidermal growth factor receptor 2 (HER2) positive breast cancer                   | 8117    | 9800        | Van Vlaenderen et al., 2009 (131) |
| Adjuvant Trastuzumab treatment (5-year) after chemotherapy treatment for breast-cancer VERSUS Usual Care, observation alone after chemotherapy IN US women with Her2/Neu-Positive Breast Cancer | 65790   | 75000       | Skedgel et al., 2009 (132)        |
| Pegfilgrastim VERSUS 6-day regiment of filgrastim IN Women with early-stage breast cancer receiving chemotherapy in the United States                                                           | 31511   | 37000       | Lyman et al., 2009 (133)          |
| Pegfilgrastim VERSUS 11-day regiment of filgrastim IN Women with early-stage breast cancer receiving chemotherapy in the United States                                                          | -300091 | Cost-Saving | Lyman et al., 2009 (133)          |
| Pegfilgrastim VERSUS Filgrastim (6-days) IN Women with early stage breast cancer receiving adjuvant chemotherapy associated with >20% febrile neutropenia risk                                  | 539     | 630         | Danova et al., 2009 (134)         |
| Treatment with trastuzumab VERSUS Treatment without trastuzumab IN United States patients with HER-2 positive early breast cancer                                                               | 26417   | 38000       | Garrison Jr et al., 2009 (135)    |

**Appendix**  
**Cost-Utility Analysis of Cancer Prevention, Treatment, and Control: A Systematic Review**  
**Winn et al.**

|                                                                                                                                                                                                                                       |       |             |                                |
|---------------------------------------------------------------------------------------------------------------------------------------------------------------------------------------------------------------------------------------|-------|-------------|--------------------------------|
| Treatment with trastuzumab VERSUS Treatment without trastuzumab IN United States patients with HER-2 positive metastatic breast cancer                                                                                                | 85676 | 120000      | Garrison Jr et al., 2009 (135) |
| Treatment with trastuzumab VERSUS Treatment without trastuzumab IN United States patients with HER-2 positive early and metastatic breast cancer                                                                                      | 35600 | 52000       | Garrison Jr et al., 2009 (135) |
| Pegfilgrastim VERSUS Filgrastim IN UK patients with breast cancer (additional differential impact on chemotherapy relative dose intensity (RDI) with long-term survival effects)                                                      | 7670  | 9000        | Liu et al., 2009 (136)         |
| Pegfilgrastim VERSUS Filgrastim IN UK patients with breast cancer (additional differential impact on febrile neutropenia (FN)-related mortality)                                                                                      | 15722 | 18000       | Liu et al., 2009 (136)         |
| Docetaxel (100 mg/m <sup>2</sup> , 1-hour intravenous (IV) infusion every 21 days) (Doc) VERSUS Paclitaxel (90mg/m <sup>2</sup> every 7 days) (Pac1w) IN UK patients with metastatic breast cancer                                    | 8448  | 9900        | Benedict et al., 2009 (137)    |
| Docetaxel (100 mg/m <sup>2</sup> , 1-hour intravenous (IV) infusion every 21 days) (Doc) VERSUS Nano albumin-bound form of paclitaxel (260mg/m <sup>2</sup> every 21 days) (Nab-P) IN UK patients with metastatic breast cancer       | 27086 | 32000       | Benedict et al., 2009 (137)    |
| Docetaxel (100 mg/m <sup>2</sup> , 1-hour intravenous (IV) infusion every 21 days) (Doc) VERSUS Paclitaxel (175 mg/m <sup>2</sup> , 3-hour IV infusion every 21 days) (Pac3w). IN UK patients with metastatic breast cancer           | 22677 | 27000       | Benedict et al., 2009 (137)    |
| Docetaxel/ cyclophosphamide (TC) VERSUS Doxorubicin/ cyclophosphamide (AC) IN Patients with breast cancer in China                                                                                                                    | 3500  | 3800        | Liubao et al., 2009 (138)      |
| Breast cancer screening from ages 47-49 VERSUS No breast cancer screening ages 47-49 IN Women aged 47-49 years in the UK                                                                                                              | 54855 | 63000       | Madan et al., 2009 (139)       |
| Recurrence score derived from each patient's gene tumor expression profile (21 gene assay), to guide adjuvant treatment VERSUS Tamoxifen only IN Lymph node negative, estrogen receptor positive women with early-stage breast cancer |       | Cost-Saving | Cosler et al., 2009 (140)      |

**Appendix**  
**Cost-Utility Analysis of Cancer Prevention, Treatment, and Control: A Systematic Review**  
**Winn et al.**

|                                                                                                                                                                                                                                                 |        |             |                           |
|-------------------------------------------------------------------------------------------------------------------------------------------------------------------------------------------------------------------------------------------------|--------|-------------|---------------------------|
| Recurrence score derived from each patient's gene tumor expression profile (21 gene assay), to guide adjuvant treatment VERSUS Chemotherapy + tamoxifen IN Lymph node negative, estrogen receptor positive women with early-stage breast cancer | 4432   | 4900        | Cosler et al., 2009 (140) |
| Delayed zoledronic acid VERSUS No zoledronic acid IN Dutch women with early stage breast cancer receiving letrozole                                                                                                                             | 32170  | 37000       | Logman et al., 2009 (141) |
| Upfront zoledronic acid VERSUS No zoledronic acid IN Dutch women with early stage breast cancer receiving letrozole                                                                                                                             | 43990  | 50000       | Logman et al., 2009 (141) |
| Upfront zoledronic acid VERSUS Delayed zoledronic acid IN Dutch women with early stage breast cancer receiving letrozole                                                                                                                        | 49786  | 57000       | Logman et al., 2009 (141) |
| Anthracycline plus docetaxel (Taxotere; FEC-D) VERSUS Anthracyclines alone (FEC-100) IN United States adult women with node-positive breast cancer                                                                                              | 9665   | 11000       | Marino et al., 2009 (142) |
| 1-year adjuvant treatment with trastuzumab VERSUS Standard adjuvant chemotherapy IN Patients with early HER2 positive breast cancer receiving adjuvant treatment in Shanghai, China                                                             | 8049   | 9200        | Chen et al., 2009 (143)   |
| 1-year adjuvant treatment with trastuzumab VERSUS Standard adjuvant chemotherapy IN Patients with early HER2 positive breast cancer receiving adjuvant treatment in Guangzhou, China                                                            | 8046   | 9200        | Chen et al., 2009 (143)   |
| 1-year adjuvant treatment with trastuzumab VERSUS Standard adjuvant chemotherapy IN Patients with early HER2 positive breast cancer receiving adjuvant treatment in Beijing, China                                                              | 7676   | 8800        | Chen et al., 2009 (143)   |
| Adjuvant trastuzumab given for 1 year upon presentation with early breast cancer VERSUS No adjuvant treatment IN Dutch women diagnosed with early breast cancer and genotyped as HER-2 positive                                                 | -6     | Cost-Saving | Essers et al., 2010 (144) |
| Annual MR imaging VERSUS Annual screen-film mammography IN United States women with BRCA1 mutations                                                                                                                                             | 203384 | 230000      | Lee et al., 2010 (145)    |
| Annual combined screening VERSUS Annual screen-film mammography IN United States women with BRCA1 mutations                                                                                                                                     | 69125  | 79000       | Lee et al., 2010 (145)    |
| Annual screen-film mammography VERSUS Clinical surveillance IN United States women with BRCA1 mutations                                                                                                                                         | 16751  | 19000       | Lee et al., 2010 (145)    |

**Appendix**  
**Cost-Utility Analysis of Cancer Prevention, Treatment, and Control: A Systematic Review**  
**Winn et al.**

|                                                                                                                                                                                                                                                               |       |       |                             |
|---------------------------------------------------------------------------------------------------------------------------------------------------------------------------------------------------------------------------------------------------------------|-------|-------|-----------------------------|
| TAC regimen: given on day 1 every 3 weeks for 6 cycles VERSUS FAC regimen: given on day 1 every 3 weeks for 6 cycles IN Breast cancer in Canadian women with operable, axillary lymph node-positive breast cancer aged 18-70.                                 | 6040  | 7100  | Mittmann et al., 2010 (146) |
| TAC & G-CSF regimen: given on day 1 every 3 weeks for 6 cycles VERSUS FAC regimen: given on day 1 every 3 weeks for 6 cycles IN Breast cancer in Canadian women with operable, axillary lymph node-positive breast cancer aged 18-70.                         | 11506 | 14000 | Mittmann et al., 2010 (146) |
| Dose-dense (DD) AC-T q2wk with prophylactic granulocyte colony-stimulating factor VERSUS Doxorubicin, cyclophosphamide, and paclitaxel (AC-T) q3wk IN Patients with high-risk early breast cancer in Japan, beginning treatment at age 35                     | 2677  | 3100  | Author et al., 2010 (147)   |
| Dose-dense (DD) AC-T q2wk with prophylactic granulocyte colony-stimulating factor VERSUS Doxorubicin, cyclophosphamide, and paclitaxel (AC-T) q3wk IN Patients with high-risk early breast cancer in Japan, beginning treatment at age 45                     | 3269  | 3800  | Author et al., 2010 (147)   |
| Dose-dense (DD) AC-T q2wk with prophylactic granulocyte colony-stimulating factor VERSUS Doxorubicin, cyclophosphamide, and paclitaxel (AC-T) q3wk IN Patients with high-risk early breast cancer in Japan, beginning treatment at age 55                     | 3438  | 4000  | Author et al., 2010 (147)   |
| Docetaxel, doxorubicin, and cyclophosphamide (TAC) with prophylactic granulocyte colonystimulating factor VERSUS Fluorouracil, doxorubicin, and cyclophosphamide (FAC) IN Patients with high-risk early breast cancer in Japan, beginning treatment at age 35 | 7908  | 9300  | Author et al., 2010 (147)   |
| Docetaxel, doxorubicin, and cyclophosphamide (TAC) with prophylactic granulocyte colonystimulating factor VERSUS Fluorouracil, doxorubicin, and cyclophosphamide (FAC) IN Patients with high-risk early breast cancer in Japan, beginning treatment at age 45 | 9280  | 11000 | Author et al., 2010 (147)   |
| Docetaxel, doxorubicin, and cyclophosphamide (TAC) with prophylactic granulocyte colonystimulating factor VERSUS Fluorouracil, doxorubicin, and cyclophosphamide (FAC) IN Patients with high-risk early breast cancer in Japan, beginning treatment at age 55 | 10535 | 12000 | Author et al., 2010 (147)   |

**Appendix**  
**Cost-Utility Analysis of Cancer Prevention, Treatment, and Control: A Systematic Review**  
**Winn et al.**

|                                                                                                                                                                                                                                     |          |                                   |                           |
|-------------------------------------------------------------------------------------------------------------------------------------------------------------------------------------------------------------------------------------|----------|-----------------------------------|---------------------------|
| 70-gene signature VERSUS Currently used clinical guidelines, Adjuvant Online IN 1000 patients in hypothetical cohort, aged 50 years with early, operable node-negative, estrogen receptor (ER) positive breast cancer               | 5744     | 7000                              | Retel et al., 2010 (148)  |
| 70-gene signature VERSUS Currently used clinical guidelines, Sankt Gallen IN 1000 patients in hypothetical cohort, aged 50 years with early, operable node-negative, estrogen receptor (ER) positive breast cancer                  | -7708    | Cost-Saving                       | Retel et al., 2010 (148)  |
| Fluorescence in situ hybridisation (FISH) VERSUS No trastuzumab IN Female breast cancer patients (aged 50 years), with an assumption of 20% to be HER-2-positive                                                                    | 17064    | 19000                             | Blank et al., 2010 (149)  |
| munohistochemistry (IHC) VERSUS Fluorescence in situ hybridisation (FISH) IN Female breast cancer patients (aged 50 years), with an assumption of 20% to be HER-2-positive                                                          | -69517   | Increases Costs, Decreases Health | Blank et al., 2010 (149)  |
| Parallel immunohistochemistry (IHC) and fluorescence in situ hybridisation (FISH) VERSUS Fluorescence in situ hybridisation (FISH) IN Female breast cancer patients (aged 50 years), with an assumption of 20% to be HER-2-positive | 557633   | 620000                            | Blank et al., 2010 (149)  |
| No test VERSUS Fluorescence in situ hybridisation (FISH) IN Female breast cancer patients (aged 50 years), with an assumption of 20% to be HER-2-positive                                                                           | 18752375 | 21000000                          | Blank et al., 2010 (149)  |
| Immunohistochemistry (IHC) first, fluorescence in situ hybridism (FISH) only for IHC2+ VERSUS No trastuzumab IN Female breast cancer patients (aged 50 years), with an assumption of 20% to be HER-2-positive                       | 18739    | 21000                             | Blank et al., 2010 (149)  |
| Treatment for stage I breast cancer VERSUS No treatment IN Dutch women aged less than 75 years old.                                                                                                                                 | 8849     | 10000                             | Baeten et al., 2010 (150) |
| Treatment for stage IV breast cancer VERSUS No treatment IN Dutch women aged less than 75 years old.                                                                                                                                | 22011    | 25000                             | Baeten et al., 2010 (150) |
| Treatment for stage II breast cancer VERSUS No treatment IN Dutch women aged less than 75 years old.                                                                                                                                | 8852     | 10000                             | Baeten et al., 2010 (150) |

**Appendix**  
**Cost-Utility Analysis of Cancer Prevention, Treatment, and Control: A Systematic Review**  
**Winn et al.**

|                                                                                                                                                                                                                                                              |       |             |                           |
|--------------------------------------------------------------------------------------------------------------------------------------------------------------------------------------------------------------------------------------------------------------|-------|-------------|---------------------------|
| Treatment for stage III breast cancer VERSUS No treatment IN Dutch women aged less than 75 years old.                                                                                                                                                        | 6188  | 7100        | Baeten et al., 2010 (150) |
| Treatment for all stage breast cancer VERSUS No treatment IN Dutch women aged less than 75 years old.                                                                                                                                                        | 7346  | 8400        | Baeten et al., 2010 (150) |
| Treatment for all stage breast cancer & preventive screening for breast cancer VERSUS No treatment or screening IN Dutch women aged less than 75 years old.                                                                                                  | 3339  | 3800        | Baeten et al., 2010 (150) |
| Treatment for stage I breast cancer VERSUS No treatment or screening IN Dutch women aged older than 75 years old.                                                                                                                                            | 33939 | 39000       | Baeten et al., 2010 (150) |
| Treatment for stage II breast cancer VERSUS No treatment or screening IN Dutch women aged older than 75 years old.                                                                                                                                           | 35495 | 41000       | Baeten et al., 2010 (150) |
| Treatment for stage III breast cancer VERSUS No treatment or screening IN Dutch women aged older than 75 years old.                                                                                                                                          | 25415 | 29000       | Baeten et al., 2010 (150) |
| Treatment for stage IV breast cancer VERSUS No treatment or screening IN Dutch women aged older than 75 years old.                                                                                                                                           | 95547 | 110000      | Baeten et al., 2010 (150) |
| Treatment for all stages of breast cancer VERSUS No treatment or screening IN Dutch women aged older than 75 years old.                                                                                                                                      | 30019 | 34000       | Baeten et al., 2010 (150) |
| Treatment for all stages of breast cancer and preventive screening VERSUS No treatment or screening IN Dutch women aged older than 75 years old.                                                                                                             | 16132 | 18000       | Baeten et al., 2010 (150) |
| Anastrozole (Arimidex) VERSUS Tamoxifen IN Post-menopausal German women with early stage, hormone receptor positive breast cancer                                                                                                                            | 31025 | 34000       | Lux et al., 2010 (151)    |
| Short stay program-Admission, surgery and discharge for breast cancer surgery within a 24 hour period VERSUS Usual care-Longer than 24 hours for admission, surgery and discharge for breast cancer IN Breast cancer surgery patients (societal perspective) |       | Cost-Saving | de Kok et al., 2010 (152) |
| Short stay program-Admission, surgery and discharge for breast cancer surgery within a 24 hour period VERSUS Usual care-Longer than 24 hours for admission, surgery and discharge for breast cancer IN Breast cancer surgery patients (patient perspective)  |       | Cost-Saving | de Kok et al., 2010 (152) |

**Appendix**  
**Cost-Utility Analysis of Cancer Prevention, Treatment, and Control: A Systematic Review**  
**Winn et al.**

|                                                                                                                                                                                                                                                                        |        |             |                                   |
|------------------------------------------------------------------------------------------------------------------------------------------------------------------------------------------------------------------------------------------------------------------------|--------|-------------|-----------------------------------|
| Short stay program-Admission, surgery and discharge for breast cancer surgery within a 24 hour period VERSUS Usual care-Longer than 24 hours for admission, surgery and discharge for breast cancer IN Breast cancer surgery patients (health care perspective)        |        | Cost-Saving | de Kok et al., 2010 (152)         |
| Short stay program-Admission, surgery and discharge for breast cancer surgery within a 24 hour period VERSUS Usual care-Longer than 24 hours for admission, surgery and discharge for breast cancer IN Breast cancer surgery patients (health care perspective)        |        | Cost-Saving | de Kok et al., 2010 (152)         |
| Oncotype DX assay and recommendations for adjuvant treatment VERSUS Standard care IN Israeli women with estrogen receptor positive, lymph node negative, early stage breast cancer                                                                                     | 10770  | 12000       | Klang et al., 2010 (153)          |
| Recurrence score (RS) guided treatment using 21-gene assay VERSUS Adjuvant! Online program (AOL) IN 50 year old women with lymph node-negative, hormone receptor-positive, early stage breast cancer                                                                   | 59542  | 65000       | Tsoi et al., 2010 (154)           |
| Capecitabine + continuation with trastuzumab VERSUS Capecitabine IN Swiss patients diagnosed with HER2+ breast cancer                                                                                                                                                  | 137026 | 150000      | Matter-Walstra et al., 2010 (155) |
| Prophylactic oophorectomy (tested positive to BRCA2) VERSUS Both prophylactic surgeries IN Women with new primary breast and ovarian cancers, aged 30-65 who tested positive for BRCA1 or BRCA2 mutations                                                              | 4587   | 5100        | Grann et al., 2010 (156)          |
| Prophylactic oophorectomy (tested positive to BRCA1) VERSUS Both prophylactic surgeries IN Women with new primary breast and ovarian cancers, aged 30-65 who tested positive for BRCA1 or BRCA2 mutations                                                              | 1741   | 1900        | Grann et al., 2010 (156)          |
| Raloxifene (for up to 5 years) VERSUS None IN US Caucasian women age 55 years old                                                                                                                                                                                      | 22152  | 24000       | Ivergård et al., 2010 (157)       |
| Adjuvant endocrine therapy plus 4 mg of zoledronic acid every 6 months for up to 3 years VERSUS Adjuvant endocrine therapy with goserlin and tamoxifen or anastrozole for up to 3 years IN US premenopausal women with hormone-responsive positive early breast cancer | -1844  | Cost-Saving | Delea et al., 2010 (158)          |

**Appendix**  
**Cost-Utility Analysis of Cancer Prevention, Treatment, and Control: A Systematic Review**  
**Winn et al.**

|                                                                                                                                                                                                                                                                                                                             |        |        |                            |
|-----------------------------------------------------------------------------------------------------------------------------------------------------------------------------------------------------------------------------------------------------------------------------------------------------------------------------|--------|--------|----------------------------|
| Letrozole VERSUS Anastrozole IN Postmenopausal women with hormone receptor positive (HR+) early stage breast cancer who are treatment naïve (have 5 years of endocrine therapy remaining) in the United States                                                                                                              | 25846  | 29000  | Lipsitz et al., 2010 (159) |
| Testing only women with medullary breast cancer VERSUS None IN Women diagnosed with breast cancer are younger than 50 years of age, did not have a previous history of ovarian cancer, nor had they had a previous bilateral salpingo-oophorectomy (BSO)                                                                    | 10250  | 11000  | Kwon et al., 2010 (160)    |
| Testing women with triple-negative breast cancers, aged <50 VERSUS Testing all women aged <40 IN Women diagnosed with breast cancer are younger than 50 years of age, did not have a previous history of ovarian cancer, nor had they had a previous bilateral salpingo-oophorectomy (BSO)                                  | 1750   | 1900   | Kwon et al., 2010 (160)    |
| Testing women with triple-negative breast cancers, aged <40 VERSUS None IN Women diagnosed with breast cancer are younger than 50 years of age, did not have a previous history of ovarian cancer, nor had they had a previous bilateral salpingo-oophorectomy (BSO)                                                        | 8906   | 9800   | Kwon et al., 2010 (160)    |
| Testing women with triple-negative breast cancers, aged <50 VERSUS Testing women with triple-negative breast cancers, aged <40 IN Women diagnosed with breast cancer are younger than 50 years of age, did not have a previous history of ovarian cancer, nor had they had a previous bilateral salpingo-oophorectomy (BSO) | 9084   | 10000  | Kwon et al., 2010 (160)    |
| Testing all women aged <50 VERSUS Testing women with triple-negative breast cancers, aged <50 IN Women diagnosed with breast cancer are younger than 50 years of age, did not have a previous history of ovarian cancer, nor had they had a previous bilateral salpingo-oophorectomy (BSO)                                  | 112908 | 120000 | Kwon et al., 2010 (160)    |



**Appendix**  
**Cost-Utility Analysis of Cancer Prevention, Treatment, and Control: A Systematic Review**  
**Winn et al.**

|                                                                                                                                                                                                                                                                                                                                                                   |        |                                   |                           |
|-------------------------------------------------------------------------------------------------------------------------------------------------------------------------------------------------------------------------------------------------------------------------------------------------------------------------------------------------------------------|--------|-----------------------------------|---------------------------|
| Testing all women aged <40 VERSUS Testing women with triple-negative breast cancers, aged <40 IN Women diagnosed with breast cancer are younger than 50 years of age, did not have a previous history of ovarian cancer, nor had they had a previous bilateral salpingo-oophorectomy (BSO)                                                                        | 10988  | 12000                             | Kwon et al., 2010 (160)   |
| Testing women with triple-negative breast cancers, aged <40 VERSUS Testing only women with medullary breast cancer IN Women diagnosed with breast cancer are younger than 50 years of age, did not have a previous history of ovarian cancer, nor had they had a previous bilateral salpingo-oophorectomy (BSO)                                                   | 7860   | 8700                              | Kwon et al., 2010 (160)   |
| Multimedia, multimodal physical activity program comprising of strength, balance, and endurance training elements VERSUS None IN Women undergoing adjuvant therapy following surgery for breast cancer in Australia                                                                                                                                               | -20344 | Increases Costs, Decreases Health | Haines et al., 2010 (161) |
| Polychemotherapy VERSUS None IN Women with node negative breast cancer                                                                                                                                                                                                                                                                                            | 41155  | 45000                             | Chang et al., 2010 (162)  |
| 100mg per square-meter intravenous infusion of docetaxel (Doc) administered every 21 days VERSUS 80mg per square-meter intravenous infusion of paclitaxel administered once weekly (Pac-1w) IN Metastatic breast cancer patients with disease progression after anthracycline-containing chemotherapy regimen                                                     | 411    | 450                               | Frías et al., 2010 (163)  |
| Recurrence Score (RS) criteria-guided treatment based on the 21-gene reverse transcriptase-polymerase chain reaction assay with a patented algorithm (Oncotype DX Breast Cancer Assay) VERSUS St Gallen 2009 criteria-guided treatment IN Lymph node-negative (LN-), estrogen receptor-positive (ER+), early stage breast cancer (ESBC) patients at the age of 55 | 3733   | 4100                              | Kondo et al., 2010 (164)  |

**Appendix**  
**Cost-Utility Analysis of Cancer Prevention, Treatment, and Control: A Systematic Review**  
**Winn et al.**

|                                                                                                                                                                                                                                                                                                                                                                                             |         |             |                          |
|---------------------------------------------------------------------------------------------------------------------------------------------------------------------------------------------------------------------------------------------------------------------------------------------------------------------------------------------------------------------------------------------|---------|-------------|--------------------------|
| Recurrence Score (RS) criteria-guided treatment based on the 21-gene reverse transcriptase-polymerase chain reaction assay with a patented algorithm (Oncotype DX Breast Cancer Assay) VERSUS St Gallen 2009 criteria-guided treatment IN Lymph node-negative LN- and Lymph node-positive LN+, estrogen receptor-positive (ER+), early stage breast cancer (ESBC) patients at the age of 55 | 5514    | 6100        | Kondo et al., 2010 (164) |
| Positron emission tomography (PET) to identify axillary lymph node metastases and control spread VERSUS Sentinel lymph node biopsy (SLNB) IN Newly diagnosed early stage breast cancer patients in the UK                                                                                                                                                                                   | -248820 | Cost-Saving | Meng et al., 2011 (165)  |
| Magnetic resonance imaging (MRI) to identify axillary lymph node metastases and control spread before SLNB VERSUS Sentinel lymph node biopsy (SLNB) IN Newly diagnosed early stage breast cancer patients in the UK                                                                                                                                                                         | 4805    | 5500        | Meng et al., 2011 (165)  |
| Positron emission tomography (PET) to identify axillary lymph node metastases and control spread before SLNB VERSUS Sentinel lymph node biopsy (SLNB) IN Newly diagnosed early stage breast cancer patients in the UK                                                                                                                                                                       | 211211  | 240000      | Meng et al., 2011 (165)  |
| Magnetic resonance imaging (MRI) to identify axillary lymph node metastases and control spread VERSUS Sentinel lymph node biopsy (SLNB) IN Newly diagnosed early stage breast cancer patients in the UK                                                                                                                                                                                     | -31450  | Cost-Saving | Meng et al., 2011 (165)  |
| Low-fat diet VERSUS None IN Women aged 55 years consuming more than 36.8% of energy from fat at baseline: societal perspective                                                                                                                                                                                                                                                              | 16560   | 18000       | B?s et al., 2011 (166)   |
| Low-fat diet VERSUS None IN Women aged 60 years consuming more than 36.8% of energy from fat at baseline: societal perspective                                                                                                                                                                                                                                                              | 20349   | 22000       | B?s et al., 2011 (166)   |
| Low-fat diet VERSUS None IN Women aged 65 years consuming more than 36.8% of energy from fat at baseline: societal perspective                                                                                                                                                                                                                                                              | 26146   | 29000       | B?s et al., 2011 (166)   |
| Low-fat diet VERSUS None IN Women aged 70 years consuming more than 36.8% of energy from fat at baseline: societal perspective                                                                                                                                                                                                                                                              | 41085   | 45000       | B?s et al., 2011 (166)   |

**Appendix**  
**Cost-Utility Analysis of Cancer Prevention, Treatment, and Control: A Systematic Review**  
**Winn et al.**

|                                                                                                                                                |        |        |                        |
|------------------------------------------------------------------------------------------------------------------------------------------------|--------|--------|------------------------|
| Low-fat diet VERSUS None IN Women aged 55 years consuming more than 36.8% of energy from fat at baseline: health care payer perspective        | 199505 | 220000 | B?s et al., 2011 (166) |
| Low-fat diet VERSUS None IN Women aged 50 years at high risk for breast cancer with >= 32% of energy from fat: societal perspective            | 19199  | 21000  | B?s et al., 2011 (166) |
| Low-fat diet VERSUS None IN Women aged 55 years at high risk for breast cancer with >= 32% of energy from fat: societal perspective            | 21394  | 24000  | B?s et al., 2011 (166) |
| Low-fat diet VERSUS None IN Women aged 60 years at high risk for breast cancer with >= 32% of energy from fat: societal perspective            | 24059  | 26000  | B?s et al., 2011 (166) |
| Low-fat diet VERSUS None IN Women aged 65 years at high risk for breast cancer with >= 32% of energy from fat: societal perspective            | 28442  | 31000  | B?s et al., 2011 (166) |
| Low-fat diet VERSUS None IN Women aged 70 years at high risk for breast cancer with >= 32% of energy from fat: societal perspective            | 40769  | 45000  | B?s et al., 2011 (166) |
| Low-fat diet VERSUS None IN Women aged 50 years consuming more than 36.8% of energy from fat at baseline: health care payer perspective        | 66059  | 73000  | B?s et al., 2011 (166) |
| Low-fat diet VERSUS None IN Women aged 65 years consuming more than 36.8% of energy from fat at baseline: health care payer perspective        | 15051  | 17000  | B?s et al., 2011 (166) |
| Low-fat diet VERSUS None IN Women aged 70 years consuming more than 36.8% of energy from fat at baseline: health care payer perspective        | 22390  | 25000  | B?s et al., 2011 (166) |
| Low-fat diet VERSUS None IN Women aged 50 years with high risk for breast cancer with >= 32% of energy from fat: health care payer perspective | 51698  | 57000  | B?s et al., 2011 (166) |

**Appendix**  
**Cost-Utility Analysis of Cancer Prevention, Treatment, and Control: A Systematic Review**  
**Winn et al.**

|                                                                                                                                                                                        |         |             |                                   |
|----------------------------------------------------------------------------------------------------------------------------------------------------------------------------------------|---------|-------------|-----------------------------------|
| Low-fat diet VERSUS None IN Women aged 55 years with high risk for breast cancer with $\geq 32\%$ of energy from fat: health care payer perspective                                    | 153460  | 170000      | B?s et al., 2011 (166)            |
| Low-fat diet VERSUS None IN Women aged 65 years with high risk for breast cancer with $\geq 32\%$ of energy from fat: health care payer perspective                                    | 15786   | 17000       | B?s et al., 2011 (166)            |
| Low-fat diet VERSUS None IN Women aged 70 years with high risk for breast cancer with $\geq 32\%$ of energy from fat: health care payer perspective                                    | 21659   | 24000       | B?s et al., 2011 (166)            |
| Low-fat diet VERSUS None IN Women aged 50 years consuming more than 36.8% of energy from fat at baseline: societal perspective                                                         | 13773   | 15000       | B?s et al., 2011 (166)            |
| Nurse-led telephone follow up and educational group program VERSUS Nurse-led telephone follow up IN Dutch women who had recently completed breast cancer treatment requiring follow up | -344088 | Cost-Saving | Kimman et al., 2011 (167)         |
| Hospital follow-up VERSUS Nurse-led telephone follow up and educational group program IN Dutch women who had recently completed breast cancer treatment requiring follow up            | 347156  | 380000      | Kimman et al., 2011 (167)         |
| Nurse-led telephone follow up VERSUS Hospital follow-up IN Dutch women who had recently completed breast cancer treatment requiring follow up                                          | 16934   | 19000       | Kimman et al., 2011 (167)         |
| 9 week trastuzumab treatment VERSUS Treatment without trastuzumab IN Finnish women with HER2 positive early breast cancer                                                              | 17671   | 19000       | Purmonen et al., 2011 (168)       |
| Tamoxifen therapy for 5 years but discontinued at the occurrence of an adverse event VERSUS None IN US postmenopausal women aged <55 years                                             | 51200   | 56000       | Noah-Vanhoucke et al., 2011 (169) |
| Trastuzumab VERSUS None IN British women with HER-2 positive early breast cancer                                                                                                       | 47851   | 53000       | Hall et al., 2011 (170)           |

**Appendix**  
**Cost-Utility Analysis of Cancer Prevention, Treatment, and Control: A Systematic Review**  
**Winn et al.**

|                                                                                                                                                                                                                                                                                                                                    |        |             |                            |
|------------------------------------------------------------------------------------------------------------------------------------------------------------------------------------------------------------------------------------------------------------------------------------------------------------------------------------|--------|-------------|----------------------------|
| Docetaxel 75 mg/sq. m and cyclophosphamide 600 mg/sq. m (TC) VERSUS Doxorubicin 60 mg/sq. m and cyclophosphamide 600 mg/sq. m (AC) IN Women with resected node-positive or high-risk node-negative operable breast cancer eligible for adjuvant chemotherapy                                                                       | 7790   | 8600        | Bernard et al., 2011 (171) |
| Biennial mammography screening from age 45-69 years VERSUS Biennial mammography screening from age 50-69 years IN Women aged 40-79 years in Spain                                                                                                                                                                                  | 12068  | 15000       | Carles et al., 2011 (172)  |
| Biennial mammography screening from age 45-74 years VERSUS Biennial mammography screening from age 45-69 years IN Women aged 40-79 years in Spain                                                                                                                                                                                  | 15726  | 19000       | Carles et al., 2011 (172)  |
| Annual mammography screening from age 45-69 years VERSUS Biennial mammography screening from age 45-74 years IN Women aged 40-79 years in Spain                                                                                                                                                                                    | 20430  | 25000       | Carles et al., 2011 (172)  |
| Annual mammography screening from age 40-69 years VERSUS Annual mammography screening from age 45-69 years IN Women aged 40-79 years in Spain                                                                                                                                                                                      | 31091  | 38000       | Carles et al., 2011 (172)  |
| Annual mammography screening from age 40-74 years VERSUS Annual mammography screening from age 40-69 years IN Women aged 40-79 years in Spain                                                                                                                                                                                      | 33263  | 40000       | Carles et al., 2011 (172)  |
| Biennial mammography screening from age 50-69 years VERSUS None IN Women aged 40-79 years in Spain                                                                                                                                                                                                                                 | 5563   | 6700        | Carles et al., 2011 (172)  |
| Primary prophylaxis with pegfilgrastim VERSUS Secondary prophylaxis with pegfilgrastim IN UK female patients aged 52 years diagnosed with stage 2 breast cancer receiving Epirubicin-docetaxel (ET75) chemotherapy with 31% febrile neutropenia (FN) risk level                                                                    | 38839  | 43000       | Whyte et al., 2011 (173)   |
| Secondary prophylaxis with filgrastim for 6 days VERSUS Secondary prophylaxis with lenograstim for 6 days IN UK female patients aged 52 years diagnosed with stage 2 breast cancer receiving TAC chemotherapy (chemotherapy regimens of docetaxel, doxorubicin, and cyclophosphamide) with 24% febrile neutropenia (FN) risk level | -94115 | Cost-Saving | Whyte et al., 2011 (173)   |

**Appendix**  
**Cost-Utility Analysis of Cancer Prevention, Treatment, and Control: A Systematic Review**  
**Winn et al.**

|                                                                                                                                                                                                                                                                                                                                 |         |             |                          |
|---------------------------------------------------------------------------------------------------------------------------------------------------------------------------------------------------------------------------------------------------------------------------------------------------------------------------------|---------|-------------|--------------------------|
| Secondary prophylaxis with pegfilgrastim VERSUS Secondary prophylaxis with filgrastim for 6 days IN UK female patients aged 52 years diagnosed with stage 2 breast cancer receiving TAC chemotherapy (chemotherapy regimens of docetaxel, doxorubicin, and cyclophosphamide) with 24% febrile neutropenia (FN) risk level       | -9373   | Cost-Saving | Whyte et al., 2011 (173) |
| Primary prophylaxis with lenograstim for 11 days VERSUS Secondary prophylaxis with pegfilgrastim IN UK female patients aged 52 years diagnosed with stage 2 breast cancer receiving TAC chemotherapy (chemotherapy regimens of docetaxel, doxorubicin, and cyclophosphamide) with 24% febrile neutropenia (FN) risk level       | 353250  | 390000      | Whyte et al., 2011 (173) |
| Primary prophylaxis with lenograstim for 6 days VERSUS Secondary prophylaxis with pegfilgrastim IN UK female patients aged 52 years diagnosed with stage 2 breast cancer receiving TAC chemotherapy (chemotherapy regimens of docetaxel, doxorubicin, and cyclophosphamide) with 24% febrile neutropenia (FN) risk level        | 179060  | 200000      | Whyte et al., 2011 (173) |
| Primary prophylaxis with filgrastim for 11 days VERSUS Primary prophylaxis with lenograstim for 6 days IN UK female patients aged 52 years diagnosed with stage 2 breast cancer receiving TAC chemotherapy (chemotherapy regimens of docetaxel, doxorubicin, and cyclophosphamide) with 24% febrile neutropenia (FN) risk level | 2228360 | 2500000     | Whyte et al., 2011 (173) |

**Appendix**  
**Cost-Utility Analysis of Cancer Prevention, Treatment, and Control: A Systematic Review**  
**Winn et al.**

|                                                                                                                                                                                                                                                                                                                                                 |         |             |                          |
|-------------------------------------------------------------------------------------------------------------------------------------------------------------------------------------------------------------------------------------------------------------------------------------------------------------------------------------------------|---------|-------------|--------------------------|
| Secondary prophylaxis with lenograstim for 11 days VERSUS No granulocyte colony-stimulating factor (G-CSF) prophylaxis IN UK female patients aged 52 years diagnosed with stage 2 breast cancer receiving TAC chemotherapy (chemotherapy regimens of docetaxel, doxorubicin, and cyclophosphamide) with 24% febrile neutropenia (FN) risk level | 60939   | 67000       | Whyte et al., 2011 (173) |
| Primary prophylaxis with filgrastim for 6 days VERSUS Primary prophylaxis with lenograstim for 6 days IN UK female patients aged 52 years diagnosed with stage 2 breast cancer receiving TAC chemotherapy (chemotherapy regimens of docetaxel, doxorubicin, and cyclophosphamide) with 24% febrile neutropenia (FN) risk level                  | -354742 | Cost-Saving | Whyte et al., 2011 (173) |
| Primary prophylaxis with pegfilgrastim VERSUS Primary prophylaxis with filgrastim for 6 days IN UK female patients aged 52 years diagnosed with stage 2 breast cancer receiving TAC chemotherapy (chemotherapy regimens of docetaxel, doxorubicin, and cyclophosphamide) with 24% febrile neutropenia (FN) risk level                           | -8861   | Cost-Saving | Whyte et al., 2011 (173) |
| Secondary prophylaxis with pegfilgrastim VERSUS No granulocyte colony-stimulating factor (G-CSF) prophylaxis IN UK female patients aged 52 years diagnosed with stage 2 breast cancer receiving TAC chemotherapy (chemotherapy regimens of docetaxel, doxorubicin, and cyclophosphamide) with 31% febrile neutropenia (FN) risk level           | 5286    | 5800        | Whyte et al., 2011 (173) |

**Appendix**  
**Cost-Utility Analysis of Cancer Prevention, Treatment, and Control: A Systematic Review**  
**Winn et al.**

|                                                                                                                                                                                                                                                                                                                                                |        |             |                              |
|------------------------------------------------------------------------------------------------------------------------------------------------------------------------------------------------------------------------------------------------------------------------------------------------------------------------------------------------|--------|-------------|------------------------------|
| Secondary prophylaxis with lenograstim for 6 days VERSUS No granulocyte colony-stimulating factor (G-CSF) prophylaxis IN UK female patients aged 52 years diagnosed with stage 2 breast cancer receiving TAC chemotherapy (chemotherapy regimens of docetaxel, doxorubicin, and cyclophosphamide) with 31% febrile neutropenia (FN) risk level | 29084  | 32000       | Whyte et al., 2011 (173)     |
| Secondary prophylaxis with filgrastim for 11 days VERSUS Secondary prophylaxis with lenograstim for 6 days IN UK female patients aged 52 years diagnosed with stage 2 breast cancer receiving TAC chemotherapy (chemotherapy regimens of docetaxel, doxorubicin, and cyclophosphamide) with 24% febrile neutropenia (FN) risk level            | 564692 | 620000      | Whyte et al., 2011 (173)     |
| Unilateral mastectomy followed by contralateral prophylactic mastectomy (CPM) VERSUS Standard of care: unilateral mastectomy followed by surveillance IN US 45 year old women with early-stage, node negative, unilateral breast cancer                                                                                                        | 4869   | 5600        | Zendejas et al., 2011 (174)  |
| Lapatinib + capecitabine (L+C) VERSUS Trastuzumab + capecitabine (T+C) IN British women with HER2+ metastatic breast cancer (MBC) previously treated with trastuzumab                                                                                                                                                                          | -6401  | Cost-Saving | Delea et al., 2011 (175)     |
| Lapatinib + capecitabine (L+C) VERSUS Capecitabine monotherapy (C-only) IN British women with HER2+ metastatic breast cancer (MBC) previously treated with trastuzumab                                                                                                                                                                         | 144636 | 160000      | Delea et al., 2011 (175)     |
| Mammography every 2 years VERSUS Mammography every 3 to 4 years IN US women aged 40 to 49 years with low breast density (Breast Imaging Reporting and Data System (BI-RADS) category 1) & mammography starting at age 40 years                                                                                                                 | 36699  | 40000       | Schousboe et al., 2011 (176) |



**Appendix**  
**Cost-Utility Analysis of Cancer Prevention, Treatment, and Control: A Systematic Review**  
**Winn et al.**

|                                                                                                                                                                                                                                 |        |        |                              |
|---------------------------------------------------------------------------------------------------------------------------------------------------------------------------------------------------------------------------------|--------|--------|------------------------------|
| Mammography every 3 to 4 years VERSUS None IN US women aged 40 to 49 years with low breast density (Breast Imaging Reporting and Data System (BI-RADS) category 2) & mammography starting at age 40 years                       | 120113 | 130000 | Schousboe et al., 2011 (176) |
| Mammography every 2 years VERSUS Mammography every 3 to 4 years IN US women aged 40 to 49 years with low breast density (Breast Imaging Reporting and Data System (BI-RADS) category 2) & mammography starting at age 40 years  | 140048 | 150000 | Schousboe et al., 2011 (176) |
| Mammography every 2 years VERSUS Mammography every 3 to 4 years IN US women aged 40 to 49 years with high breast density (Breast Imaging Reporting and Data System (BI-RADS) category 3) & mammography starting at age 40 years | 87769  | 97000  | Schousboe et al., 2011 (176) |
| Mammography every 3 to 4 years VERSUS None IN US women aged 40 to 49 years with high breast density (Breast Imaging Reporting and Data System (BI-RADS) category 4) & mammography starting at age 40 years                      | 83899  | 92000  | Schousboe et al., 2011 (176) |
| Mammography every 2 years VERSUS None IN US women aged 40 to 49 years with high breast density (Breast Imaging Reporting and Data System (BI-RADS) category 4) & mammography starting at age 40 years                           | 74482  | 82000  | Schousboe et al., 2011 (176) |
| Mammography every 3 to 4 years VERSUS None IN US women aged 50 to 59 years with low breast density (Breast Imaging Reporting and Data System (BI-RADS) category 1) & mammography starting at age 40 years                       | 72184  | 79000  | Schousboe et al., 2011 (176) |

**Appendix**  
**Cost-Utility Analysis of Cancer Prevention, Treatment, and Control: A Systematic Review**  
**Winn et al.**

|                                                                                                                                                                                                                                 |        |        |                              |
|---------------------------------------------------------------------------------------------------------------------------------------------------------------------------------------------------------------------------------|--------|--------|------------------------------|
| Mammography every 2 years VERSUS Mammography every 3 to 4 years IN US women aged 50 to 59 years with low breast density (Breast Imaging Reporting and Data System (BI-RADS) category 1) & mammography starting at age 40 years  | 208748 | 230000 | Schousboe et al., 2011 (176) |
| Mammography every 3 to 4 years VERSUS None IN US women aged 50 to 59 years with low breast density (Breast Imaging Reporting and Data System (BI-RADS) category 2) & mammography starting at age 40 years                       | 36212  | 40000  | Schousboe et al., 2011 (176) |
| Mammography every 2 years VERSUS Mammography every 3 to 4 years IN US women aged 50 to 59 years with low breast density (Breast Imaging Reporting and Data System (BI-RADS) category 2) & mammography starting at age 40 years  | 89189  | 98000  | Schousboe et al., 2011 (176) |
| Mammography every 3 to 4 years VERSUS None IN US women aged 50 to 59 years with high breast density (Breast Imaging Reporting and Data System (BI-RADS) category 3) & mammography starting at age 40 years                      | 22878  | 25000  | Schousboe et al., 2011 (176) |
| Mammography every 2 years VERSUS Mammography every 3 to 4 years IN US women aged 50 to 59 years with high breast density (Breast Imaging Reporting and Data System (BI-RADS) category 3) & mammography starting at age 40 years | 46629  | 51000  | Schousboe et al., 2011 (176) |
| Mammography every 3 to 4 years VERSUS None IN US women aged 50 to 59 years with high breast density (Breast Imaging Reporting and Data System (BI-RADS) category 4) & mammography starting at age 40 years                      | 17131  | 19000  | Schousboe et al., 2011 (176) |

**Appendix**  
**Cost-Utility Analysis of Cancer Prevention, Treatment, and Control: A Systematic Review**  
**Winn et al.**

|                                                                                                                                                                                                                                 |        |        |                              |
|---------------------------------------------------------------------------------------------------------------------------------------------------------------------------------------------------------------------------------|--------|--------|------------------------------|
| Mammography every 2 years VERSUS Mammography every 3 to 4 years IN US women aged 50 to 59 years with high breast density (Breast Imaging Reporting and Data System (BI-RADS) category 4) & mammography starting at age 40 years | 23962  | 26000  | Schousboe et al., 2011 (176) |
| Mammography every 3 to 4 years VERSUS None IN US women aged 60 to 69 years with high breast density (Breast Imaging Reporting and Data System (BI-RADS) category 3) & mammography starting at age 40 years                      | 30976  | 34000  | Schousboe et al., 2011 (176) |
| Mammography every 2 years VERSUS Mammography every 3 to 4 years IN US women aged 60 to 69 years with low breast density (Breast Imaging Reporting and Data System (BI-RADS) category 1) & mammography starting at age 40 years  | 129117 | 140000 | Schousboe et al., 2011 (176) |
| Mammography every 3 to 4 years VERSUS None IN US women aged 60 to 69 years with low breast density (Breast Imaging Reporting and Data System (BI-RADS) category 2) & mammography starting at age 40 years                       | 16724  | 18000  | Schousboe et al., 2011 (176) |
| Mammography every 2 years VERSUS Mammography every 3 to 4 years IN US women aged 60 to 69 years with low breast density (Breast Imaging Reporting and Data System (BI-RADS) category 2) & mammography starting at age 40 years  | 63707  | 70000  | Schousboe et al., 2011 (176) |
| Mammography every 3 to 4 years VERSUS None IN US women aged 60 to 69 years with high breast density (Breast Imaging Reporting and Data System (BI-RADS) category 3) & mammography starting at age 40 years                      | 12163  | 13000  | Schousboe et al., 2011 (176) |

**Appendix**  
**Cost-Utility Analysis of Cancer Prevention, Treatment, and Control: A Systematic Review**  
**Winn et al.**

|                                                                                                                                                                                                                                 |        |        |                              |
|---------------------------------------------------------------------------------------------------------------------------------------------------------------------------------------------------------------------------------|--------|--------|------------------------------|
| Mammography every 2 years VERSUS Mammography every 3 to 4 years IN US women aged 60 to 69 years with high breast density (Breast Imaging Reporting and Data System (BI-RADS) category 3) & mammography starting at age 40 years | 30948  | 34000  | Schousboe et al., 2011 (176) |
| Mammography every 3 to 4 years VERSUS None IN US women aged 60 to 69 years with high breast density (Breast Imaging Reporting and Data System (BI-RADS) category 4) & mammography starting at age 40 years                      | 8385   | 9200   | Schousboe et al., 2011 (176) |
| Mammography every 2 years VERSUS Mammography every 3 to 4 years IN US women aged 60 to 69 years with high breast density (Breast Imaging Reporting and Data System (BI-RADS) category 4) & mammography starting at age 40 years | 21425  | 24000  | Schousboe et al., 2011 (176) |
| Mammography every 3 to 4 years VERSUS None IN US women aged 70 to 79 years with low breast density (Breast Imaging Reporting and Data System (BI-RADS) category 1) & mammography starting at age 40 years                       | 18223  | 20000  | Schousboe et al., 2011 (176) |
| Mammography every 2 years VERSUS Mammography every 3 to 4 years IN US women aged 70 to 79 years with low breast density (Breast Imaging Reporting and Data System (BI-RADS) category 1) & mammography starting at age 40 years  | 150568 | 170000 | Schousboe et al., 2011 (176) |
| Mammography every 3 to 4 years VERSUS None IN US women aged 70 to 79 years with low breast density (Breast Imaging Reporting and Data System (BI-RADS) category 2) & mammography starting at age 40 years                       | 13574  | 15000  | Schousboe et al., 2011 (176) |

**Appendix**  
**Cost-Utility Analysis of Cancer Prevention, Treatment, and Control: A Systematic Review**  
**Winn et al.**

|                                                                                                                                                                                                                                 |        |        |                              |
|---------------------------------------------------------------------------------------------------------------------------------------------------------------------------------------------------------------------------------|--------|--------|------------------------------|
| Mammography every 2 years VERSUS Mammography every 3 to 4 years IN US women aged 70 to 79 years with low breast density (Breast Imaging Reporting and Data System (BI-RADS) category 2) & mammography starting at age 40 years  | 96004  | 110000 | Schousboe et al., 2011 (176) |
| Mammography every 3 to 4 years VERSUS None IN US women aged 70 to 79 years with high breast density (Breast Imaging Reporting and Data System (BI-RADS) category 3) & mammography starting at age 40 years                      | 5214   | 5700   | Schousboe et al., 2011 (176) |
| Mammography every 2 years VERSUS Mammography every 3 to 4 years IN US women aged 70 to 79 years with high breast density (Breast Imaging Reporting and Data System (BI-RADS) category 3) & mammography starting at age 40 years | 50982  | 56000  | Schousboe et al., 2011 (176) |
| Mammography every 3 to 4 years VERSUS None IN US women aged 70 to 79 years with high breast density (Breast Imaging Reporting and Data System (BI-RADS) category 4) & mammography starting at age 40 years                      | 5400   | 5900   | Schousboe et al., 2011 (176) |
| Mammography every 2 years VERSUS Mammography every 3 to 4 years IN US women aged 70 to 79 years with high breast density (Breast Imaging Reporting and Data System (BI-RADS) category 4) & mammography starting at age 40 years | 40540  | 45000  | Schousboe et al., 2011 (176) |
| Mammography every 3 to 4 years VERSUS None IN US women aged 40 to 49 years with low breast density (Breast Imaging Reporting and Data System (BI-RADS) category 1) & mammography starting at age 40 years                       | 228427 | 250000 | Schousboe et al., 2011 (176) |

**Appendix**  
**Cost-Utility Analysis of Cancer Prevention, Treatment, and Control: A Systematic Review**  
**Winn et al.**

|                                                                                                                                                                                                                                                                                                                                                                                                                                                                            |       |       |                             |
|----------------------------------------------------------------------------------------------------------------------------------------------------------------------------------------------------------------------------------------------------------------------------------------------------------------------------------------------------------------------------------------------------------------------------------------------------------------------------|-------|-------|-----------------------------|
| Second generation chemotherapy with eight cycles of fluorouracil, epirubicin, cyclophosphamide (FEC60) or four cycles of epirubicin followed by four cycles of cyclophosphamide, methotrexate, fluorouracil (E-CMF) VERSUS First generation chemotherapy with six cycles of cyclophosphamide, methotrexate, fluorouracil (CMF) IN UK women aged 40 years with ER negative early breast cancer and average risk of recurrence                                               | 873   | 960   | Campbell et al., 2011 (177) |
| Third generation chemotherapy with four cycles of fluorouracil, epirubicin, cyclophosphamide (FEC60) followed by four cycles of docetaxel (FEC-D) VERSUS Second generation chemotherapy with eight cycles of fluorouracil, epirubicin, cyclophosphamide (FEC60) or four cycles of epirubicin followed by four cycles of cyclophosphamide, methotrexate, fluorouracil (E-CMF) IN UK women aged 60 years with ER negative early breast cancer and average risk of recurrence | 26859 | 30000 | Campbell et al., 2011 (177) |
| Third generation chemotherapy with four cycles of fluorouracil, epirubicin, cyclophosphamide (FEC60) followed by four cycles of docetaxel (FEC-D) VERSUS Second generation chemotherapy with eight cycles of fluorouracil, epirubicin, cyclophosphamide (FEC60) or four cycles of epirubicin followed by four cycles of cyclophosphamide, methotrexate, fluorouracil (E-CMF) IN UK women aged 40 years with ER negative early breast cancer and average risk of recurrence | 19842 | 22000 | Campbell et al., 2011 (177) |
| Third generation chemotherapy with four cycles of fluorouracil, epirubicin, cyclophosphamide (FEC60) followed by four cycles of docetaxel (FEC-D) VERSUS Second generation chemotherapy with eight cycles of fluorouracil, epirubicin, cyclophosphamide (FEC60) or four cycles of epirubicin followed by four cycles of cyclophosphamide, methotrexate, fluorouracil (E-CMF) IN UK women aged 40 years with ER positive early breast cancer and average risk of recurrence | 34905 | 39000 | Campbell et al., 2011 (177) |
| Third generation chemotherapy with four cycles of fluorouracil, epirubicin, cyclophosphamide (FEC60) followed by four cycles of docetaxel (FEC-D) VERSUS Second generation chemotherapy with eight cycles of fluorouracil, epirubicin, cyclophosphamide (FEC60) or four cycles of epirubicin followed by four cycles of cyclophosphamide, methotrexate, fluorouracil (E-CMF) IN UK women aged 60 years with ER positive early breast cancer and average risk of recurrence | 66486 | 73000 | Campbell et al., 2011 (177) |

**Appendix**  
**Cost-Utility Analysis of Cancer Prevention, Treatment, and Control: A Systematic Review**  
**Winn et al.**

|                                                                                                                                                                                                                                                                                                                                                                                                                                                                         |        |        |                             |
|-------------------------------------------------------------------------------------------------------------------------------------------------------------------------------------------------------------------------------------------------------------------------------------------------------------------------------------------------------------------------------------------------------------------------------------------------------------------------|--------|--------|-----------------------------|
| Third generation chemotherapy with four cycles of fluorouracil, epirubicin, cyclophosphamide (FEC60) followed by four cycles of docetaxel (FEC-D) VERSUS Second generation chemotherapy with eight cycles of fluorouracil, epirubicin, cyclophosphamide (FEC60) or four cycles of epirubicin followed by four cycles of cyclophosphamide, methotrexate, fluorouracil (E-CMF) IN UK women aged 40 years with ER negative early breast cancer and high risk of recurrence | 12698  | 14000  | Campbell et al., 2011 (177) |
| Third generation chemotherapy with four cycles of fluorouracil, epirubicin, cyclophosphamide (FEC60) followed by four cycles of docetaxel (FEC-D) VERSUS Second generation chemotherapy with eight cycles of fluorouracil, epirubicin, cyclophosphamide (FEC60) or four cycles of epirubicin followed by four cycles of cyclophosphamide, methotrexate, fluorouracil (E-CMF) IN UK women aged 60 years with ER negative early breast cancer and high risk of recurrence | 3355   | 3700   | Campbell et al., 2011 (177) |
| Third generation chemotherapy with four cycles of fluorouracil, epirubicin, cyclophosphamide (FEC60) followed by four cycles of docetaxel (FEC-D) VERSUS Second generation chemotherapy with eight cycles of fluorouracil, epirubicin, cyclophosphamide (FEC60) or four cycles of epirubicin followed by four cycles of cyclophosphamide, methotrexate, fluorouracil (E-CMF) IN UK women aged 40 years with ER positive early breast cancer and low risk of recurrence  | 101523 | 110000 | Campbell et al., 2011 (177) |
| Third generation chemotherapy with four cycles of fluorouracil, epirubicin, cyclophosphamide (FEC60) followed by four cycles of docetaxel (FEC-D) VERSUS Second generation chemotherapy with eight cycles of fluorouracil, epirubicin, cyclophosphamide (FEC60) or four cycles of epirubicin followed by four cycles of cyclophosphamide, methotrexate, fluorouracil (E-CMF) IN UK women aged 60 years with ER positive early breast cancer and low risk of recurrence  | 781114 | 860000 | Campbell et al., 2011 (177) |
| Second generation chemotherapy with eight cycles of fluorouracil, epirubicin, cyclophosphamide (FEC60) or four cycles of epirubicin followed by four cycles of cyclophosphamide, methotrexate, fluorouracil (E-CMF) VERSUS First generation chemotherapy with six cycles of cyclophosphamide, methotrexate, fluorouracil (CMF) IN UK women aged 60 years with ER negative early breast cancer and average risk of recurrence                                            | 6041   | 6700   | Campbell et al., 2011 (177) |

**Appendix**  
**Cost-Utility Analysis of Cancer Prevention, Treatment, and Control: A Systematic Review**  
**Winn et al.**

|                                                                                                                                                                                                                                                                                                                                                                                                                              |       |       |                             |
|------------------------------------------------------------------------------------------------------------------------------------------------------------------------------------------------------------------------------------------------------------------------------------------------------------------------------------------------------------------------------------------------------------------------------|-------|-------|-----------------------------|
| Second generation chemotherapy with eight cycles of fluorouracil, epirubicin, cyclophosphamide (FEC60) or four cycles of epirubicin followed by four cycles of cyclophosphamide, methotrexate, fluorouracil (E-CMF) VERSUS First generation chemotherapy with six cycles of cyclophosphamide, methotrexate, fluorouracil (CMF) IN UK women aged 40 years with ER positive early breast cancer and average risk of recurrence | 2505  | 2800  | Campbell et al., 2011 (177) |
| Second generation chemotherapy with eight cycles of fluorouracil, epirubicin, cyclophosphamide (FEC60) or four cycles of epirubicin followed by four cycles of cyclophosphamide, methotrexate, fluorouracil (E-CMF) VERSUS First generation chemotherapy with six cycles of cyclophosphamide, methotrexate, fluorouracil (CMF) IN UK women aged 60 years with ER positive early breast cancer and average risk of recurrence | 20740 | 23000 | Campbell et al., 2011 (177) |
| Second generation chemotherapy with eight cycles of fluorouracil, epirubicin, cyclophosphamide (FEC60) or four cycles of epirubicin followed by four cycles of cyclophosphamide, methotrexate, fluorouracil (E-CMF) VERSUS First generation chemotherapy with six cycles of cyclophosphamide, methotrexate, fluorouracil (CMF) IN UK women aged 40 years with ER negative early breast cancer and high risk of recurrence    | 361   | 400   | Campbell et al., 2011 (177) |
| Second generation chemotherapy with eight cycles of fluorouracil, epirubicin, cyclophosphamide (FEC60) or four cycles of epirubicin followed by four cycles of cyclophosphamide, methotrexate, fluorouracil (E-CMF) VERSUS First generation chemotherapy with six cycles of cyclophosphamide, methotrexate, fluorouracil (CMF) IN UK women aged 60 years with ER negative early breast cancer and high risk of recurrence    | 3355  | 3700  | Campbell et al., 2011 (177) |
| Second generation chemotherapy with eight cycles of fluorouracil, epirubicin, cyclophosphamide (FEC60) or four cycles of epirubicin followed by four cycles of cyclophosphamide, methotrexate, fluorouracil (E-CMF) VERSUS First generation chemotherapy with six cycles of cyclophosphamide, methotrexate, fluorouracil (CMF) IN UK women aged 40 years with ER positive early breast cancer and low risk of recurrence     | 10354 | 11000 | Campbell et al., 2011 (177) |



**Appendix**  
**Cost-Utility Analysis of Cancer Prevention, Treatment, and Control: A Systematic Review**  
**Winn et al.**

|                                                                                                                                                                                                                                                                                                                                                                                                                          |        |        |                                      |                               |
|--------------------------------------------------------------------------------------------------------------------------------------------------------------------------------------------------------------------------------------------------------------------------------------------------------------------------------------------------------------------------------------------------------------------------|--------|--------|--------------------------------------|-------------------------------|
| Second generation chemotherapy with eight cycles of fluorouracil, epirubicin, cyclophosphamide (FEC60) or four cycles of epirubicin followed by four cycles of cyclophosphamide, methotrexate, fluorouracil (E-CMF) VERSUS First generation chemotherapy with six cycles of cyclophosphamide, methotrexate, fluorouracil (CMF) IN UK women aged 60 years with ER positive early breast cancer and low risk of recurrence |        |        | Increases Costs,<br>Decreases Health | Campbell et al., 2011 (177)   |
| First generation chemotherapy with six cycles of cyclophosphamide, methotrexate, fluorouracil (CMF) VERSUS None IN UK women aged 40 years with ER negative early breast cancer and average risk of recurrence                                                                                                                                                                                                            | 889    | 980    |                                      | Campbell et al., 2011 (177)   |
| Oncotype DX: 21-gene assay in treatment decisions VERSUS Standard care IN US women with node positive (N+(1-3) and estrogen receptor positive (ER+) and herceptin 2 negative (HER2-) early-stage breast cancer                                                                                                                                                                                                           | -86    |        | Cost-Saving                          | Vanderlaan et al., 2011 (178) |
| Adjuvant TC (docetaxel 75 mg/m <sup>2</sup> and cyclophosphamide 600 mg/m <sup>2</sup> every 3 weeks for 4 cycles) VERSUS Adjuvant AC (doxorubicin 60 mg/m <sup>2</sup> and cyclophosphamide 600 mg/m <sup>2</sup> every 3 weeks for 4 cycles) IN US women with breast cancer undergoing adjuvant chemotherapy                                                                                                           | 15818  | 17000  |                                      | Younis et al., 2011 (179)     |
| Paclitaxel/Bevacizumab VERSUS Paclitaxel alone IN US patients with advanced breast cancer                                                                                                                                                                                                                                                                                                                                | 608265 | 660000 |                                      | Montero et al., 2011 (180)    |
| Letrozole VERSUS Tamoxifen IN Postmenopausal women patients with hormone receptor positive breast carcinoma in Germany                                                                                                                                                                                                                                                                                                   | 38876  | 42000  |                                      | Lux et al., 2011 (181)        |
| Anastrozole VERSUS Tamoxifen IN Postmenopausal women patients with hormone receptor positive breast carcinoma in Germany                                                                                                                                                                                                                                                                                                 | 178109 | 190000 |                                      | Lux et al., 2011 (181)        |
| 70-gene signature assay for guiding adjuvant chemotherapy decisions VERSUS 21-gene assay IN Patients with early, node-negative breast cancer in Netherlands (sensitivity and specificity of test based on Fan-series)                                                                                                                                                                                                    | -16825 |        | Cost-Saving                          | Ret?l et al., 2012 (182)      |

**Appendix**  
**Cost-Utility Analysis of Cancer Prevention, Treatment, and Control: A Systematic Review**  
**Winn et al.**

|                                                                                                                                                                                                                                            |         |                                      |                          |
|--------------------------------------------------------------------------------------------------------------------------------------------------------------------------------------------------------------------------------------------|---------|--------------------------------------|--------------------------|
| 21-gene assay for guiding adjuvant chemotherapy decisions VERSUS Adjuvant Online (AO) IN Patients with early, node-negative breast cancer in Netherlands (sensitivity and specificity of test based on Fan-series)                         | 2117499 | Increases Costs,<br>Decreases Health | Ret?l et al., 2012 (182) |
| 70-gene signature assay for guiding adjuvant chemotherapy decisions VERSUS St. Gallen guidelines (2003) IN Patients with early, node-negative breast cancer in Netherlands (sensitivity and specificity of test based on Thomassen-series) | -5081   | Cost-Saving                          | Ret?l et al., 2012 (182) |
| 70-gene signature assay for guiding adjuvant chemotherapy decisions VERSUS 21-gene assay IN Patients with early, node-negative breast cancer in Netherlands (sensitivity and specificity of test based on Thomassen-series)                | -24401  | Cost-Saving                          | Ret?l et al., 2012 (182) |
| Genomic test-directed chemotherapy using Oncotype DX-21 gene assay with chemotherapy VERSUS Standard of care (chemotherapy for all patients) IN Patients with lymph node-positive, estrogen receptor-positive early-stage breast cancer    | 8870    | 9300                                 | Hall et al., 2012 (183)  |
| Goserelin (3.6 mg) subcutaneous depot injection into abdominal wall every 4 weeks VERSUS 6 cycles of combined therapy of cyclophosphamide, methotrexate and 5-Fuorouracil (CMF) IN Premenopausal women with breast cancer in Taiwan        | 1891    | 2100                                 | Cheng et al., 2012 (184) |
| Goserelin (3.6 mg) subcutaneous depot injection into abdominal wall every 4 weeks VERSUS 6 cycles of combined therapy of docetaxel, epirubicin, cyclophosphamide (TEC) IN Premenopausal women with breast cancer in Taiwan                 | -3528   | Cost-Saving                          | Cheng et al., 2012 (184) |
| Goserelin (3.6 mg) subcutaneous depot injection into abdominal wall every 4 weeks VERSUS 6 cycles of combined therapy of 5-fluorouracil, epirubicin, cyclophosphamide (FEC) IN Premenopausal women with breast cancer in Taiwan            | 974     | 1100                                 | Cheng et al., 2012 (184) |
| Goserelin (3.6 mg) subcutaneous depot injection into abdominal wall every 4 weeks VERSUS 6 cycles of docetaxel, epirubicin (TE) IN Premenopausal women with breast cancer in Taiwan                                                        | -3511   | Cost-Saving                          | Cheng et al., 2012 (184) |

**Appendix**  
**Cost-Utility Analysis of Cancer Prevention, Treatment, and Control: A Systematic Review**  
**Winn et al.**

|                                                                                                                                                                                                                                                                                                                                              |        |             |                           |
|----------------------------------------------------------------------------------------------------------------------------------------------------------------------------------------------------------------------------------------------------------------------------------------------------------------------------------------------|--------|-------------|---------------------------|
| Goserelin (3.6 mg) subcutaneous depot injection into abdominal wall every 4 weeks VERSUS 6 cycles of docetaxel, epirubicin (TE) IN Premenopausal women with breast cancer in Taiwan                                                                                                                                                          | -4168  | Cost-Saving | Cheng et al., 2012 (184)  |
| Goserelin (3.6 mg) subcutaneous depot injection into abdominal wall every 4 weeks VERSUS 6 cycles of combined therapy of cyclophosphamide, methotrexate and 5-Fuorouracil (CMF) IN Premenopausal women with breast cancer in Taiwan                                                                                                          | 1887   | 2000        | Cheng et al., 2012 (184)  |
| Goserelin (3.6 mg) subcutaneous depot injection into abdominal wall every 4 weeks VERSUS 6 cycles of combined therapy of docetaxel, epirubicin, cyclophosphamide (TEC) IN Premenopausal women with breast cancer in Taiwan                                                                                                                   | -4201  | Cost-Saving | Cheng et al., 2012 (184)  |
| Goserelin (3.6 mg) subcutaneous depot injection into abdominal wall every 4 weeks VERSUS 6 cycles of combined therapy of 5-fluorouracil, epirubicin, cyclophosphamide (FEC) IN Premenopausal women with breast cancer in Taiwan                                                                                                              | 971    | 1100        | Cheng et al., 2012 (184)  |
| 12-month adjuvant trastuzumab VERSUS Standard chemotherapy IN Women aged 50 years with early HER-2/neu-positive breast cancer and surgical resection of disease                                                                                                                                                                              | 12720  | 14000       | Hedden et al., 2012 (185) |
| 70-gene prognosis-signature-guided treatment VERSUS St. Gallen criteria-guided treatment (without multigene assays or 70-gene prognosis-signature-guided treatment) IN Patients aged 55 years with hormone receptor-positive, lymph node-negative, human epidermal growth factor receptor type 2-negative early stage breast cancer in Japan | 44226  | 48000       | Kondo et al., 2012 (186)  |
| Trastuzumab as first-line treatment VERSUS Standard chemotherapy IN Adult patients with human epidermal growth factor receptor 2-positive (HER2) advanced gastric or gastroesophageal junction cancer in China                                                                                                                               | 251667 | 270000      | Wu et al., 2012 (187)     |
| 70-gene profile microarray assay (Mammaprint) VERSUS 21-gene profile assay using real-time (RT) polymerase chain reaction (Oncotype DX) IN US patients with lymph node-negative, estrogen receptor positive breast cancer                                                                                                                    | -64784 | Cost-Saving | Yang et al., 2012 (188)   |

**Appendix**  
**Cost-Utility Analysis of Cancer Prevention, Treatment, and Control: A Systematic Review**  
**Winn et al.**

|                                                                                                                                                                                                                                                                                                                  |        |                                      |                           |
|------------------------------------------------------------------------------------------------------------------------------------------------------------------------------------------------------------------------------------------------------------------------------------------------------------------|--------|--------------------------------------|---------------------------|
| Biennial mass mammography screening in women aged 40-79 years VERSUS Biennial mass mammography screening in women aged 40-69 years IN Chinese women aged 40 years in Hong Kong                                                                                                                                   | 204444 | 220000                               | Wong et al., 2012 (189)   |
| Shortening waiting time to radiotherapy from breast-conserving surgery in early breast cancer by 15% VERSUS Standard of care IN Chinese women aged 40 years in Hong Kong                                                                                                                                         | 7500   | 8100                                 | Wong et al., 2012 (189)   |
| Shortening waiting time to radiotherapy from breast-conserving surgery in early breast cancer by 25% VERSUS Shortening waiting time to radiotherapy from breast-conserving surgery in early breast cancer by 15% IN Chinese women aged 40 years in Hong Kong                                                     | 2500   | 2700                                 | Wong et al., 2012 (189)   |
| Adjuvant aromatase inhibitor (AI) therapy for 2 to 3 years followed by tamoxifen in postmenopausal women with estrogen receptor-positive cancer VERSUS Standard of care IN Chinese women aged 40 years in Hong Kong                                                                                              | 17636  | 19000                                | Wong et al., 2012 (189)   |
| Upfront 5-year adjuvant aromatase therapy (AI) in postmenopausal women with estrogen receptor-positive cancer VERSUS Adjuvant aromatase inhibitor (AI) therapy for 2 to 3 years followed by tamoxifen in postmenopausal women with estrogen receptor-positive cancer IN Chinese women aged 40 years in Hong Kong | -61500 | Increases Costs,<br>Decreases Health | Wong et al., 2012 (189)   |
| Enhanced home based palliative care VERSUS Standard of care IN Chinese women aged 40 years in Hong Kong                                                                                                                                                                                                          | 6750   | 7300                                 | Wong et al., 2012 (189)   |
| Enhanced inpatient palliative care VERSUS Enhanced home based palliative care IN Chinese women aged 40 years in Hong Kong                                                                                                                                                                                        | -15000 | Increases Costs,<br>Decreases Health | Wong et al., 2012 (189)   |
| Biennial mass mammography screening in women aged 40-69 years VERSUS Standard of care IN Chinese women aged 40 years in Hong Kong                                                                                                                                                                                | 72534  | 79000                                | Wong et al., 2012 (189)   |
| 21 gene recurrence score assay (Oncotype DX RS) VERSUS Standard of care IN Patients with endocrine sensitive node positive breast cancer                                                                                                                                                                         | 15024  | 16000                                | Lamond et al., 2012 (190) |
| 21 gene recurrence score assay (Oncotype DX RS) VERSUS Standard of care IN Patients with endocrine sensitive node negative breast cancer                                                                                                                                                                         | 9707   | 10000                                | Lamond et al., 2012 (190) |

**Appendix**  
**Cost-Utility Analysis of Cancer Prevention, Treatment, and Control: A Systematic Review**  
**Winn et al.**

|                                                                                                                                                                                                                                                                                                              |        |                                      |                             |
|--------------------------------------------------------------------------------------------------------------------------------------------------------------------------------------------------------------------------------------------------------------------------------------------------------------|--------|--------------------------------------|-----------------------------|
| Annual bone mineral density screening and selective bisphosphonates for osteoporosis VERSUS One time bone mineral density screening and selective bisphosphonates for osteoporosis IN Post-menopausal women aged 60 years with HR-positive stage I, II, or IIIA breast cancer receiving aromatase inhibitors | 61786  | 67000                                | Ito et al., 2012 (191)      |
| One-time bone mineral density screening and selective bisphosphonates for osteopenia VERSUS Annual bone mineral density screening and selective bisphosphonates for osteoporosis IN Post-menopausal women aged 60 years with HR-positive stage I, II, or IIIA breast cancer receiving aromatase inhibitors   | -12121 | Increases Costs,<br>Decreases Health | Ito et al., 2012 (191)      |
| Annual bone mineral density screening and selective bisphosphonates for osteopenia VERSUS Annual bone mineral density screening and selective bisphosphonates for osteoporosis IN Post-menopausal women aged 60 years with HR-positive stage I, II, or IIIA breast cancer receiving aromatase inhibitors     | 129300 | 140000                               | Ito et al., 2012 (191)      |
| Universal bisphosphonates VERSUS Annual bone mineral density screening and selective bisphosphonates for osteopenia IN Post-menopausal women aged 60 years with HR-positive stage I, II, or IIIA breast cancer receiving aromatase inhibitors                                                                | 283600 | 310000                               | Ito et al., 2012 (191)      |
| One-time bone mineral density screening and selective bisphosphonates for osteoporosis VERSUS None IN Post-menopausal women aged 60 years with HR-positive stage I, II, or IIIA breast cancer receiving aromatase inhibitors                                                                                 | 117826 | 130000                               | Ito et al., 2012 (191)      |
| Sentinal lymph node biopsy VERSUS Axillary node dissection IN Patients with early breast cancer tumor grade 2 with risk of node-positive disease in Australia                                                                                                                                                | -98732 | Cost-Saving                          | Verry et al., 2012 (192)    |
| Denosumab VERSUS Zoledronic acid IN Patients with bone metastases secondary to breast cancer                                                                                                                                                                                                                 | 697499 | 760000                               | Snedecor et al., 2012 (193) |
| 21-gene recurrence score assay in guiding chemotherapy VERSUS Non-recurrence score-guided treatment with risk classification based on clinicopathologic characteristics IN Patients with early stage node-negative estrogen receptor-positive breast cancer: healthcare perspective                          | 16677  | 18000                                | Reed et al., 2012 (194)     |

**Appendix**  
**Cost-Utility Analysis of Cancer Prevention, Treatment, and Control: A Systematic Review**  
**Winn et al.**

|                                                                                                                                                                                                                                                                                 |           |             |                            |
|---------------------------------------------------------------------------------------------------------------------------------------------------------------------------------------------------------------------------------------------------------------------------------|-----------|-------------|----------------------------|
| 21-gene recurrence score assay in guiding chemotherapy VERSUS Non-recurrence score-guided treatment with risk classification based on clinicopathologic characteristics IN Patients with early stage estrogen receptor-positive breast cancer: societal perspective             | 10788     | 11000       | Reed et al., 2012 (194)    |
| On-time whole breast radiotherapy (WBRT) VERSUS Brachytherapy IN Women aged >60 years with stage I breast cancer and no evidence of local disease (NED) after breast-conserving surgery (BCS)                                                                                   | -11691999 | Cost-Saving | Gold et al., 2012 (195)    |
| Accelerated partial breast radiotherapy aka 3-dimensional conformal radiotherapy (3DCRT) VERSUS 8+ week-delay whole breast radiotherapy (WBRT) IN Women aged >60 years with stage I breast cancer and no evidence of local disease (NED) after breast-conserving surgery (BCS)  |           | Cost-Saving | Gold et al., 2012 (195)    |
| Accelerated partial breast radiotherapy aka 3-dimensional conformal radiotherapy (3DCRT) VERSUS 12+ week-delay whole breast radiotherapy (WBRT) IN Women aged >60 years with stage I breast cancer and no evidence of local disease (NED) after breast-conserving surgery (BCS) | -989000   | Cost-Saving | Gold et al., 2012 (195)    |
| Lapatinib + letrozole (aromatase inhibitor) VERSUS Letrozole (aromatase inhibitor) IN Patients with metatstatic hormone-receptor-positive breast cancer that overexpresses HER2                                                                                                 | 114240    | 120000      | Doss et al., 2012 (196)    |
| Trastuzumab + anastrozole (aromatase inhibitor) VERSUS Anastrozole (aromatase inhibitor) alone IN Patients with metatstatic hormone-receptor-positive breast cancer that overexpresses HER2                                                                                     | 78733     | 85000       | Doss et al., 2012 (196)    |
| 21-gene recurrence score (RS) assay VERSUS Current Canadian clinical practice (CCP) IN Pre-menopausal women with early-stage estrogen- or progesterone-receptor positive, axillary lymph-node negative breast cancer (ER+ / PR+ LN- ESBC) in Canada                             | -971      | Cost-Saving | Hannouf et al., 2012 (197) |

**Appendix**  
**Cost-Utility Analysis of Cancer Prevention, Treatment, and Control: A Systematic Review**  
**Winn et al.**

|                                                                                                                                                                                                                                                                                                                                      |        |             |                            |
|--------------------------------------------------------------------------------------------------------------------------------------------------------------------------------------------------------------------------------------------------------------------------------------------------------------------------------------|--------|-------------|----------------------------|
| 21-gene recurrence score (RS) assay VERSUS Current Canadian clinical practice (CCP) IN Post-menopausal women with early-stage estrogen- or progesterone-receptor positive, axillary lymph-node negative breast cancer (ER+ / PR+ LN- ESBC) in Canada                                                                                 | 58284  | 63000       | Hannouf et al., 2012 (197) |
| Radiotherapy after lumpectomy VERSUS None IN Women with early stage node-negative or node-positive breast cancer after lumpectomy (breast-conserving surgery)                                                                                                                                                                        | -419   | Cost-Saving | Bai et al., 2012 (198)     |
| Radiotherapy after lumpectomy VERSUS None IN Women with early stage node-negative breast cancer after lumpectomy (breast-conserving surgery)                                                                                                                                                                                         | -578   | Cost-Saving | Bai et al., 2012 (198)     |
| Radiotherapy after lumpectomy VERSUS None IN Women with early stage node-positive breast cancer after lumpectomy (breast-conserving surgery)                                                                                                                                                                                         | -329   | Cost-Saving | Bai et al., 2012 (198)     |
| Therapy based on 21-gene assay recurrence score (RS) {Oncotype DX Breast Cancer Test} VERSUS Standard/Usual care IN Specific disease-early-stage estrogen receptor positive (ER+) and human epidermal growth factor receptor negative (HER2-); Age- Adult; Gender- Female; Country- Germany.                                         | -11153 | Cost-Saving | Blohmer et al., 2013 (199) |
| Systemic chemotherapy eribulin VERSUS Three most commonly utilized drugs: vinorelbine, gemcitabine and capecitabine (X) IN Specific disease-advanced breast cancer (metastatic); Age- Adult; Gender- Female; Country- United States; Other- height of 165 cm and a weight of 70 kg, and therefore a BSA of 1.79 m2 (using Mosteller. | 213742 | 220000      | Lopes et al., 2013 (200)   |

**Appendix**  
**Cost-Utility Analysis of Cancer Prevention, Treatment, and Control: A Systematic Review**  
**Winn et al.**

|                                                                                                                                                                                                                                                                                                                                                                    |        |        |                                |
|--------------------------------------------------------------------------------------------------------------------------------------------------------------------------------------------------------------------------------------------------------------------------------------------------------------------------------------------------------------------|--------|--------|--------------------------------|
| Systemic chemotherapy eribulin VERSUS Capecitabine IN Specific disease- advanced breast cancer (metastatic); Age- Adult; Gender- Female; Country- United States; Other- height of 165 cm and a weight of 70 kg, and therefore a BSA of 1.79 m2 (using Mosteller).                                                                                                  | 167268 | 170000 | Lopes et al., 2013 (200)       |
| Systemic chemotherapy eribulin VERSUS Nab-paclitaxel IN Specific disease- advanced breast cancer (metastatic); Age- Adult; Gender- Female; Country- United States.                                                                                                                                                                                                 | 129774 | 130000 | Lopes et al., 2013 (200)       |
| Systemic chemotherapy eribulin VERSUS Liposomal doxorubicin IN Specific disease- advanced breast cancer (metastatic); Age- Adult; Gender- Female; Country- United States.                                                                                                                                                                                          | 109283 | 110000 | Lopes et al., 2013 (200)       |
| Systemic chemotherapy eribulin VERSUS Ixabepilone IN Specific disease- advanced breast cancer (metastatic); Age- Adult; Gender- Female; Country- United States.                                                                                                                                                                                                    | 76823  | 79000  | Lopes et al., 2013 (200)       |
| Digital mammography beginning at age 30 years (DM30) VERSUS Clinical surveillance IN Healthy; Age- Adult; Gender- Female; Country- United States; Other- BRCA1 carriers.                                                                                                                                                                                           | 15300  | 17000  | Cott Chubiz et al., 2013 (201) |
| Alternating magnetic resonance imaging and digital mammography every 6 months beginning at age 30 years (Alt30) VERSUS Digital mammography beginning at age 25 years (DM25) IN Healthy; Age- Adult; Gender- Female; Country- United States; Other- BRCA1 carriers.                                                                                                 | 74200  | 81000  | Cott Chubiz et al., 2013 (201) |
| Annual magnetic resonance imaging beginning at age 25 years with alternating digital mammography every 6 months added at age 30 years (MRI25/Alt30) VERSUS Alternating magnetic resonance imaging and digital mammography every 6 months beginning at age 30 years ( Alt30) IN Healthy; Age- Adult; Gender- Female; Country- United States; Other- BRCA1 carriers. | 185000 | 200000 | Cott Chubiz et al., 2013 (201) |



**Appendix**  
**Cost-Utility Analysis of Cancer Prevention, Treatment, and Control: A Systematic Review**  
**Winn et al.**

|                                                                                                                                                                                                                                                                                                                                                                   |         |                                      |                                |
|-------------------------------------------------------------------------------------------------------------------------------------------------------------------------------------------------------------------------------------------------------------------------------------------------------------------------------------------------------------------|---------|--------------------------------------|--------------------------------|
| Alternating magnetic resonance imaging and digital mammography every 6 months beginning at age 25 years (Alt25) VERSUS Annual magnetic resonance imaging beginning at age 25 years with alternating digital mammography every 6 months added at age 30 years (MRI25/Alt30) IN Healthy; Age- Adult; Gender- Female; Country- United States; Other- BRCA1 carriers. | 1400000 | 1500000                              | Cott Chubiz et al., 2013 (201) |
| Alternating magnetic resonance imaging and digital mammography every 6 months beginning at age 25 years (Alt25) VERSUS Annual magnetic resonance imaging beginning at age 25 years with alternating digital mammography every 6 months added at age 30 years (MRI25/Alt30) IN Healthy; Age- Adult; Gender- Female; Country- United States; Other- BRCA2 carriers. | -140000 | Increases Costs,<br>Decreases Health | Cott Chubiz et al., 2013 (201) |
| Annual magnetic resonance imaging beginning at age 25 years with alternating digital mammography every 6 months added at age 30 years (MRI25/Alt30) VERSUS Alternating magnetic resonance imaging and digital mammography every 6 months beginning at age30 years (Alt30) IN Healthy; Age- Adult; Gender- Female; Country- United States; Other- BRCA2 carriers.  | 380000  | 410000                               | Cott Chubiz et al., 2013 (201) |
| Alternating magnetic resonance imaging and digital mammography every 6 months beginning at age30 years (Alt30) VERSUS Digital mammography beginning at age 25 years (DM 25) IN Healthy; Age- Adult; Gender- Female; Country- United States; Other- BRCA2 carriers.                                                                                                | 190000  | 210000                               | Cott Chubiz et al., 2013 (201) |
| Digital mammography beginning at age 30 years (DM 30) VERSUS Clinical surveillance IN Healthy; Age- Adult; Gender- Female; Country- United States; Other- BRCA2 carriers.                                                                                                                                                                                         | 16900   | 18000                                | Cott Chubiz et al., 2013 (201) |
| Digital mammography beginning at age 25 years (DM25) VERSUS Digital mammography beginning at age 30 years (DM30) IN Healthy; Age- Adult; Gender- Female; Country- United States; Other- BRCA1 carriers.                                                                                                                                                           | 130000  | 140000                               | Cott Chubiz et al., 2013 (201) |
| Digital mammography beginning at age 25 years (DM25) VERSUS Digital mammography beginning at age 30 years (DM30) IN Healthy; Age- Adult; Gender- Female; Country- United States; Other- BRCA2 carriers.                                                                                                                                                           |         | Increases Costs,<br>Decreases Health | Cott Chubiz et al., 2013 (201) |

**Appendix**  
**Cost-Utility Analysis of Cancer Prevention, Treatment, and Control: A Systematic Review**  
**Winn et al.**

|                                                                                                                                                                                                                                                                                                     |       |       |                         |
|-----------------------------------------------------------------------------------------------------------------------------------------------------------------------------------------------------------------------------------------------------------------------------------------------------|-------|-------|-------------------------|
| Whole breast irradiation delivered utilizing intensity-modulated radiation therapy (WBI IMRT) VERSUS Accelerated partial-breast irradiation techniques, 3-dimensional conformal radiotherapy (APBI 3-D CRT) IN Specific disease- breast cancer; Age- Adult; Gender- Female; Country- United States. | 11716 | 12000 | Shah et al., 2013 (202) |
| Whole breast irradiation delivered utilizing intensity-modulated radiation therapy (WBI IMRT) VERSUS Accelerated partial-breast irradiation techniques, intensity-modulated radiation therapy (APBI IMRT) IN Specific disease- breast cancer; Age- Adult; Gender- Female; Country- United States.   | 8408  | 8800  | Shah et al., 2013 (202) |
| Whole breast irradiation delivered utilizing intensity-modulated radiation therapy (WBI IMRT) VERSUS Accelerated partial-breast irradiation techniques, single-lumen (APBI single-lumen) IN Specific disease- breast cancer; Age- Adult; Gender- Female; Country- United States.                    | 6696  | 7000  | Shah et al., 2013 (202) |
| Whole breast irradiation delivered utilizing intensity-modulated radiation therapy (WBI IMRT) VERSUS Accelerated partial-breast irradiation techniques, multi-lumen (APBI multi-lumen) IN Specific disease- breast cancer; Age- Adult; Gender- Female; Country- United States.                      | 3498  | 3700  | Shah et al., 2013 (202) |
| Whole breast irradiation delivered utilizing intensity-modulated radiation therapy (WBI IMRT) VERSUS Accelerated partial-breast irradiation techniques, interstitia (APBI interstitial) IN Specific disease- breast cancer; Age- Adult; Gender- Female; Country- United States.                     | 7393  | 7800  | Shah et al., 2013 (202) |
| Whole breast irradiation delivered utilizing intensity-modulated radiation therapy (WBI IMRT) VERSUS Accelerated partial-breast irradiation techniques, 3-dimensional conformal radiotherapy (APBI 3-D CRT) IN Specific disease- breast cancer; Age- Adult; Gender- Female; Country- United States. | 4290  | 4500  | Shah et al., 2013 (202) |
| Whole breast irradiation delivered utilizing 3-dimensional conformal radiotherapy (WBI 3D-CRT) VERSUS Accelerated partial-breast irradiation techniques,intensity-modulated radiation therapy (APBI IMRT) IN Specific disease- breast cancer; Age- Adult; Gender- Female; Country- United States.   | 983   | 1000  | Shah et al., 2013 (202) |
| Accelerated partial-breast irradiation techniques,single-lumen (APBI single-lumen) VERSUS Accelerated partial-breast irradiation delivered utilizing 3-dimensional conformal radiotherapy (APBI 3D-CRT) IN Specific disease- breast cancer; Age- Adult; Gender- Female; Country- United             | 12273 | 13000 | Shah et al., 2013 (202) |

**Appendix**  
**Cost-Utility Analysis of Cancer Prevention, Treatment, and Control: A Systematic Review**  
**Winn et al.**

---

States.

|                                                                                                                                                                                                                                                                                                |        |        |                           |
|------------------------------------------------------------------------------------------------------------------------------------------------------------------------------------------------------------------------------------------------------------------------------------------------|--------|--------|---------------------------|
| Accelerated partial-breast irradiation techniques, multi-lumen (APBI multi-lumen) VERSUS Accelerated partial-breast irradiation delivered utilizing 3-dimensional conformal radiotherapy (APBI 3D-CRT) IN Specific disease- breast cancer; Age- Adult; Gender- Female; Country- United States. | 66032  | 69000  | Shah et al., 2013 (202)   |
| Accelerated partial-breast irradiation techniques, interstitial VERSUS Accelerated partial-breast irradiation delivered utilizing 3-dimensional conformal radiotherapy (APBI 3D-CRT) IN Specific disease- breast cancer; Age- Adult; Gender- Female; Country- United States.                   | 546    | 570    | Shah et al., 2013 (202)   |
| Paclitaxel based chemotherapy for first line therapy VERSUS Bevacizumab plus paclitaxel based chemotherapy for first line therapy IN Specific disease- Metastatic HER2- neu negative breast cancer; Age- Unknown; Gender- Female; Country- United States; Other- Treatment naïve patients.     | 232721 | 250000 | Refaat et al., 2013 (203) |
| Fulvestrant 500mg VERSUS Letrozole IN Specific disease- advanced breast cancer; Age- Adult; Gender- Female; Country- United Kingdom; Other- postmenopausal women.                                                                                                                              | 53304  | 58000  | Das et al., 2013 (204)    |
| Fulvestrant 500mg VERSUS Anastrozole IN Specific disease- advanced breast cancer; Age- Adult; Gender- Female; Country- United Kingdom; Other- postmenopausal women.                                                                                                                            | 48580  | 53000  | Das et al., 2013 (204)    |
| Anastrozole VERSUS Letrozole IN Specific disease- advanced breast cancer; Age- Adult; Gender- Female; Country- United Kingdom; Other- postmenopausal women.                                                                                                                                    | 64626  | 70000  | Das et al., 2013 (204)    |

---

**Appendix**  
**Cost-Utility Analysis of Cancer Prevention, Treatment, and Control: A Systematic Review**  
**Winn et al.**

|                                                                                                                                                                                                                                                                                                                                                                                                                                                                   |        |             |                               |
|-------------------------------------------------------------------------------------------------------------------------------------------------------------------------------------------------------------------------------------------------------------------------------------------------------------------------------------------------------------------------------------------------------------------------------------------------------------------|--------|-------------|-------------------------------|
| Nanoparticle albumin-bound paclitaxel administered every 3 weeks VERSUS polyethylated castor oil-based standard paclitaxel administered every 3 weeks IN Specific disease- breast cancer; Age- Adult; Gender- Female; Country- Spain; Other- failed first-line antitumor treatment.                                                                                                                                                                               | 24781  | 26000       | Alba et al., 2013 (205)       |
| Paclitaxel albumin VERSUS Conventional paclitaxel IN Specific disease- Metastatic breast cancer; Age- Adult; Gender- Female; Country- Italy.                                                                                                                                                                                                                                                                                                                      | 21137  | 22000       | Lazzaro et al., 2013 (206)    |
| Oncotype Dx assay informed arm (received the assay) VERSUS Assay naïve IN Specific disease- Oestrogen receptor positive node negative breast cancer; Age- 19 to 40 years, 41 to 64 years, >=65 years; Gender- Female; Country- Canada.                                                                                                                                                                                                                            | 6441   | 7000        | Davidson et al., 2013 (207)   |
| Single-stage, implant-based immediate breast reconstruction using acellular dermal matrix VERSUS Single-stage, implant-based immediate breast reconstruction using autologous dermal flap IN Specific disease- mastectomy; Age- Adult; Gender- Female; Country- United States.                                                                                                                                                                                    | 261720 | 270000      | Krishnan et al., 2013 (208)   |
| Laser-assisted indocyanine green angiography (LAIGA) in free autologous breast reconstruction after mastectomy. VERSUS Without LAIGA in free autologous breast reconstruction after mastectomy. IN Specific disease- after mastectomy; Age- Adult; Gender- Female; Country- United States.                                                                                                                                                                        | 3517   | 3700        | Chatterjee et al., 2013 (209) |
| Breast screening mammography VERSUS None IN Healthy; Age- Adult; Gender- Female; Country- United Kingdom.                                                                                                                                                                                                                                                                                                                                                         | 33369  | 35000       | Pharoah et al., 2013 (210)    |
| Oncotype DX testing VERSUS None IN Specific disease- Early breast cancer; Age- Adult; Gender- Female; Country- United Kingdom.                                                                                                                                                                                                                                                                                                                                    | 9621   | 10000       | Holt et al., 2013 (211)       |
| Medicare full prescription coverage VERSUS Standard/Usual Care- usual Medicare Part D prescription coverage : Medicare covered 67% of the drug cost of aromatase inhibitors (ie, \$40 per month), and patients paid 33% of the drug cost (ie, \$20 per month) IN Specific disease- stage I or II breast cancer; Age- >=65 years; Gender- Female; Country- United States; Other- postmenopausal women with hormone receptor-positive, stage I or II breast cancer. | -9167  | Cost-Saving | Ito et al., 2013 (212)        |

**Appendix**  
**Cost-Utility Analysis of Cancer Prevention, Treatment, and Control: A Systematic Review**  
**Winn et al.**

|                                                                                                                                                                                                                                                                                                                                                                                                                                                                   |           |                                      |                             |
|-------------------------------------------------------------------------------------------------------------------------------------------------------------------------------------------------------------------------------------------------------------------------------------------------------------------------------------------------------------------------------------------------------------------------------------------------------------------|-----------|--------------------------------------|-----------------------------|
| Medicare full prescription coverage VERSUS Standard/Usual Care- usual Medicare Part D prescription coverage : Medicare covered 67% of the drug cost of aromatase inhibitors (ie, \$40 per month), and patients paid 33% of the drug cost (ie, \$20 per month) IN Specific disease- stage I or II breast cancer; Age- >=65 years; Gender- Female; Country- United States; Other- postmenopausal women with hormone receptor-positive, stage I or II breast cancer. | 17267     | 18000                                | Ito et al., 2013 (212)      |
| Expanded reflex testing VERSUS Standard/Usual Care- standard HER2 testing involved retesting only IHC21 specimens using FISH in line with National Comprehensive Cancer Network (NCCN) guidelines IN Specific disease- early stage breast cancer; Age- Unknown; Gender- Female; Country- United States.                                                                                                                                                           | 39745     | 43000                                | Garrison et al., 2013 (213) |
| 3-week whole-breast external-beam radiation therapy VERSUS Intraoperative radiation therapy (IORT) IN Specific disease- Breast cancer; Age- Adult; Gender- Female; Country- United States.                                                                                                                                                                                                                                                                        | -64907    | Increases Costs,<br>Decreases Health | Alvarado et al., 2013 (214) |
| 6-week whole-breast external-beam radiation therapy VERSUS Intraoperative radiation therapy (IORT) IN Specific disease- Breast cancer; Age- Adult; Gender- Female; Country- United States.                                                                                                                                                                                                                                                                        | -19965384 | Increases Costs,<br>Decreases Health | Alvarado et al., 2013 (214) |
| Annual mammography plus MRI screening VERSUS Annual mammography IN Healthy; Age- 41 to 64 years, >=65 years; Gender- Both; Country- Canada.                                                                                                                                                                                                                                                                                                                       | 48058     | 53000                                | Pataky et al., 2013 (215)   |
| 21-gene assay for patients with low Adjuvant Online! Risk VERSUS None IN Specific disease- early breast cancer; Age- Adult; Gender- Female; Country- Canada; Other- lymphnode-negative, estrogen receptor- and/or progesterone receptor-positive, human epidermal growth factor receptor 2/neu-negative early breast cancer.                                                                                                                                      | 22456     | 23000                                | Paulden et al., 2013 (216)  |

**Appendix**  
**Cost-Utility Analysis of Cancer Prevention, Treatment, and Control: A Systematic Review**  
**Winn et al.**

|                                                                                                                                                                                                                                                                                                                                           |       |       |                               |
|-------------------------------------------------------------------------------------------------------------------------------------------------------------------------------------------------------------------------------------------------------------------------------------------------------------------------------------------|-------|-------|-------------------------------|
| 21-gene assay for patients with intermediate Adjuvant Online! Risk VERSUS None IN Specific disease- early breast cancer; Age- Adult; Gender- Female; Country- Canada; Other- lymphnode-negative, estrogen receptor- and/or progesterone receptor-positive, human epidermal growth factor receptor 2/neu-negative early breast cancer.     | 2528  | 2600  | Paulden et al.,<br>2013 (216) |
| 21-gene assay for patients with high Adjuvant Online! Risk VERSUS None IN Specific disease- early breast cancer; Age- Adult; Gender- Female; Country- Canada; Other- lymphnode-negative, estrogen receptor- and/or progesterone receptor-positive, human epidermal growth factor receptor 2/neu-negative early breast cancer.             | 1112  | 1100  | Paulden et al.,<br>2013 (216) |
| Chemotherapy for patients with low 21-gene assay Adjuvant Online! Risk VERSUS None IN Specific disease- early breast cancer; Age- Adult; Gender- Female; Country- Canada; Other- lymphnode-negative, estrogen receptor- and/or progesterone receptor-positive, human epidermal growth factor receptor 2/neu-negative early breast cancer. | 44120 | 45000 | Paulden et al.,<br>2013 (216) |

**Appendix**  
**Cost-Utility Analysis of Cancer Prevention, Treatment, and Control: A Systematic Review**  
**Winn et al.**

|                                                                                                                                                                                                                                                                                                                                                    |       |             |                              |
|----------------------------------------------------------------------------------------------------------------------------------------------------------------------------------------------------------------------------------------------------------------------------------------------------------------------------------------------------|-------|-------------|------------------------------|
| Chemotherapy for patients with intermediate 21-gene assay Adjuvant Online! Risk VERSUS None IN Specific disease- early breast cancer; Age- Adult; Gender- Female; Country- Canada; Other- lymphnode-negative, estrogen receptor- and/or progesterone receptor-positive, human epidermal growth factor receptor 2/neu-negative early breast cancer. | 1777  | 1800        | Paulden et al., 2013 (216)   |
| Chemotherapy for patients with high 21-gene assay Adjuvant Online! Risk VERSUS None IN Specific disease- early breast cancer; Age- Adult; Gender- Female; Country- Canada; Other- lymphnode-negative, estrogen receptor- and/or progesterone receptor-positive, human epidermal growth factor receptor 2/neu-negative early breast cancer.         | 1779  | 1800        | Paulden et al., 2013 (216)   |
| High adherence (>80%) to tamoxifen VERSUS Low adherence (<80%) to tamoxifen IN Specific disease- breast cancer; Age- 41 to 64 years, >=65 years; Gender- Female; Country- United Kingdom.                                                                                                                                                          | -8552 | Cost-Saving | McCowan et al., 2013 (217)   |
| Aprepitant for prevention of chemotherapy-induced nausea and vomiting VERSUS UK comparator regimen IN Specific disease- Breast cancer; Age- Adult; Gender- Female; Country- United Kingdom.                                                                                                                                                        | 16745 | 18000       | Humphreys et al., 2013 (218) |
| Screen-film mammography (SFM) annually VERSUS Standard/Usual Care IN Healthy; Age- 41 to 64 years; Gender- Female; Country- Brazil.                                                                                                                                                                                                                | 7467  | 8100        | Souza et al., 2013 (219)     |
| Screen-film mammography (SFM) every 2 years VERSUS Standard/Usual Care IN Healthy; Age- 41 to 64 years; Gender- Female; Country- Brazil.                                                                                                                                                                                                           | 858   | 930         | Souza et al., 2013 (219)     |
| Full-field digital mammography (FFDM) annually until 49 years & screen-film mammography (SFM) annually from 50 to 69 years VERSUS Standard/Usual Care IN Healthy; Age- 41 to 64 years; Gender- Female; Country- Brazil.                                                                                                                            | 17356 | 19000       | Souza et al., 2013 (219)     |

**Appendix**  
**Cost-Utility Analysis of Cancer Prevention, Treatment, and Control: A Systematic Review**  
**Winn et al.**

|                                                                                                                                                                                                                                                                                    |        |             |                           |
|------------------------------------------------------------------------------------------------------------------------------------------------------------------------------------------------------------------------------------------------------------------------------------|--------|-------------|---------------------------|
| 70-gene signature (70-GS) genomic profiling VERSUS Adjuvant! Online (AO) IN Specific disease- breast cancer; Age-; Gender- Female; Country- Netherlands.                                                                                                                           | -4821  | Cost-Saving | Retèl et al., 2013 (220)  |
| Lapatinib (250mg tablet)-letrozole (2.5mg tablet) [LAP-LET] VERSUS Letrozole (2.5mg tablet) [LET] IN Specific disease- Hormone receptor-positive metastatic breast cancer; Age- Adult; Gender- Female; Country- Canada; Other- Postmenopausal women.                               | 142381 | 150000      | Delea et al., 2013 (221)  |
| Lapatinib (250mg tablet)-letrozole (2.5mg tablet) [LAP-LET] VERSUS Trastuzumab (440mg vial)- anastrozole (1mg tablet) [TRZ-ANA] IN Specific disease- Hormone receptor-positive metastatic breast cancer; Age- Adult; Gender- Female; Country- Canada; Other- Postmenopausal women. | 10390  | 11000       | Delea et al., 2013 (221)  |
| Lapatinib (250mg tablet)-letrozole (2.5mg tablet) [LAP-LET] VERSUS Anastrozole (1mg tablet) [ANA] IN Specific disease- Hormone receptor-positive metastatic breast cancer; Age- Adult; Gender- Female; Country- Canada; Other- Postmenopausal women.                               | 108504 | 110000      | Delea et al., 2013 (221)  |
| Breast reconstruction surgery: Immediate Implant Placement VERSUS None IN Specific disease- Mastectomy; Age- Adult; Gender- Female; Country- United States; Other- Without radiation therapy.                                                                                      | 161858 | 170000      | Grover et al., 2013 (222) |
| Breast reconstruction surgery: Latissimus dorsi with implant VERSUS None IN Specific disease- Mastectomy; Age- Adult; Gender- Female; Country- United States; Other- Without radiation therapy.                                                                                    | 233653 | 250000      | Grover et al., 2013 (222) |
| Breast reconstruction surgery: Autologous flaps with pedicled tissue VERSUS None IN Specific disease- Mastectomy; Age- Adult; Gender- Female; Country- United States; Other- Without radiation therapy.                                                                            | 61322  | 65000       | Grover et al., 2013 (222) |



**Appendix**  
**Cost-Utility Analysis of Cancer Prevention, Treatment, and Control: A Systematic Review**  
**Winn et al.**

|                                                                                                                                                                                                      |         |         |                           |
|------------------------------------------------------------------------------------------------------------------------------------------------------------------------------------------------------|---------|---------|---------------------------|
| Breast reconstruction surgery: Autologous flaps with free tissue VERSUS None IN Specific disease- Mastectomy; Age- Adult; Gender- Female; Country- United States; Other- Without radiation therapy.  | 66843   | 70000   | Grover et al., 2013 (222) |
| Breast reconstruction surgery: Expander-implant VERSUS None IN Specific disease- Mastectomy; Age- Adult; Gender- Female; Country- United States; Other- Without radiation therapy.                   | 526673  | 550000  | Grover et al., 2013 (222) |
| Breast reconstruction surgery: Expander-implant VERSUS None IN Specific disease- Mastectomy; Age- Adult; Gender- Female; Country- United States; Other- With radiation therapy.                      | 1506884 | 1600000 | Grover et al., 2013 (222) |
| Breast reconstruction surgery: Autologous flaps with free tissue VERSUS None IN Specific disease- Mastectomy; Age- Adult; Gender- Female; Country- United States; Other- With radiation therapy.     | 56745   | 60000   | Grover et al., 2013 (222) |
| Breast reconstruction surgery: Autologous flaps with pedicled tissue VERSUS None IN Specific disease- Mastectomy; Age- Adult; Gender- Female; Country- United States; Other- With radiation therapy. | 52845   | 56000   | Grover et al., 2013 (222) |
| Breast reconstruction surgery: Latissimus dorsi with implant VERSUS None IN Specific disease- Mastectomy; Age- Adult; Gender- Female; Country- United States; Other- With radiation therapy.         | 123885  | 130000  | Grover et al., 2013 (222) |
| Breast reconstruction surgery: Immediate Implant Placement VERSUS None IN Specific disease- Mastectomy; Age- Adult; Gender- Female; Country- United States; Other- With radiation therapy.           | 302220  | 320000  | Grover et al., 2013 (222) |
| Gail risk test VERSUS Mammogram IN Healthy; Age- 19 to 40 years, 41 to 64 years; Gender- Female; Country- United States.                                                                             | 141415  | 150000  | Folse et al., 2013 (223)  |

**Appendix**  
**Cost-Utility Analysis of Cancer Prevention, Treatment, and Control: A Systematic Review**  
**Winn et al.**

|                                                                                                                                                                                                                                                                                 |         |         |                            |
|---------------------------------------------------------------------------------------------------------------------------------------------------------------------------------------------------------------------------------------------------------------------------------|---------|---------|----------------------------|
| 7SNP test, 18-26 VERSUS Gail risk test IN Healthy; Age- 19 to 40 years, 41 to 64 years; Gender- Female; Country- United States.                                                                                                                                                 | 162840  | 170000  | Folse et al., 2013 (223)   |
| 7SNP test, 16-28 VERSUS 7SNP, 18-26 IN Healthy; Age- 19 to 40 years, 41 to 64 years; Gender- Female; Country- United States.                                                                                                                                                    | 163988  | 170000  | Folse et al., 2013 (223)   |
| 7SNP test, 14-32 VERSUS 7SNP, 16-28 IN Healthy; Age- 19 to 40 years, 41 to 64 years; Gender- Female; Country- United States.                                                                                                                                                    | 4108048 | 4200000 | Folse et al., 2013 (223)   |
| 7SNP test, 12-36 VERSUS 7SNP, 14-32 IN Healthy; Age- 19 to 40 years, 41 to 64 years; Gender- Female; Country- United States.                                                                                                                                                    | 357649  | 370000  | Folse et al., 2013 (223)   |
| 7SNP test, 10-38 VERSUS 7SNP test, 12-36 IN Healthy; Age- 19 to 40 years, 41 to 64 years; Gender- Female; Country- United States.                                                                                                                                               | 634133  | 650000  | Folse et al., 2013 (223)   |
| Lapatinib + letrozole (LAP + LET) VERSUS letrozole (LET) IN Specific disease- hormone receptor-and HER2-positive metastatic breast cancer; Age- Adult; Gender- Female; Country- United Kingdom; Other- post menopausal women.                                                   | 119437  | 130000  | Delea et al., 2013 (224)   |
| Lapatinib + letrozole (LAP + LET) VERSUS trastuzumab and anastrozole (TZ + ANA) IN Specific disease- hormone receptor-and HER2-positive metastatic breast cancer; Age- Adult; Gender- Female; Country- United Kingdom; Other- post menopausal women.                            | 35032   | 37000   | Delea et al., 2013 (224)   |
| Adjuvant trastuzumab (52 weeks) + standard anthracycline/taxane-based chemotherapy VERSUS Standard/Usual Care- standard anthracycline/taxane-based chemotherapy IN Specific disease- early HER2-positive breast cancer; Age- 41 to 64 years; Gender- Female; Country- Colombia. | 71491   | 78000   | Buendía et al., 2013 (225) |

## Cervical Cancer

| Description                                                                                                                                                                                                    | Original<br>US\$/QALY | 2014US\$/QALY | Reference                      |
|----------------------------------------------------------------------------------------------------------------------------------------------------------------------------------------------------------------|-----------------------|---------------|--------------------------------|
| One-time Pap smear screening program VERSUS No screening program IN Low-income 70 yo black women seeking medical care from a municipal hospital outpatient clinic                                              |                       | Cost-Saving   | van Ineveld et al., 1990 (226) |
| Aggressive targeted screening: Human Papillomavirus Test using Polymerase Chain Reaction VERSUS No screening IN HIV-infected women with CD4 of 200-500/mm <sup>3</sup> on highly active antiretroviral therapy | 11400                 | 16000         | Goldie et al., 2001 (227)      |
| Aggressive targeted screening: Human Papillomavirus Test using Polymerase Chain Reaction VERSUS No screening IN HIV-infected women with CD4 of <200/mm <sup>3</sup> on highly active antiretroviral therapy    | 13111                 | 19000         | Goldie et al., 2001 (227)      |
| Aggressive targeted screening: Human Papillomavirus Test using Polymerase Chain Reaction VERSUS No screening IN HIV-infected women with CD4 of <200/mm <sup>3</sup>                                            | 20300                 | 29000         | Goldie et al., 2001 (227)      |
| Aggressive targeted screening: Human Papillomavirus Test using Hybrid Capture II VERSUS No screening IN HIV-infected women with CD4 of 200-500/mm <sup>3</sup> on highly active antiretroviral therapy         | 11300                 | 16000         | Goldie et al., 2001 (227)      |
| Aggressive targeted screening: Human Papillomavirus Test using Hybrid Capture II VERSUS No screening IN HIV-infected women with CD4 of <200/mm <sup>3</sup> on highly active antiretroviral therapy            | 12700                 | 18000         | Goldie et al., 2001 (227)      |
| Aggressive targeted screening: Human Papillomavirus Test using Hybrid Capture II VERSUS No screening IN HIV-infected women with CD4 of <200/mm <sup>3</sup>                                                    | 20000                 | 28000         | Goldie et al., 2001 (227)      |
| Pap test every 3 years until the age of 75 VERSUS Pap test every 3 years until the age of 65 IN Hypothetical cohort of U.S. women - age 20                                                                     | 11830                 | 16000         | Mandelblatt et al., 2002 (228) |
| Pap test every 2 years until the age of 75 VERSUS Pap test every 3 years until the age of 75 IN Hypothetical cohort of U.S. women - age 20                                                                     | 29781                 | 41000         | Mandelblatt et al., 2002 (228) |

**Appendix**  
**Cost-Utility Analysis of Cancer Prevention, Treatment, and Control: A Systematic Review**  
**Winn et al.**

|                                                                                                                                                                                                                                                                                                                                                                                           |       |                                      |                                |
|-------------------------------------------------------------------------------------------------------------------------------------------------------------------------------------------------------------------------------------------------------------------------------------------------------------------------------------------------------------------------------------------|-------|--------------------------------------|--------------------------------|
| Pap test every 2 years until the age of 100 VERSUS Pap test every 2 years until the age of 75 IN Hypothetical cohort of U.S. women - age 20                                                                                                                                                                                                                                               | 56440 | 78000                                | Mandelblatt et al., 2002 (228) |
| Pap test and HPV test every 2 years until the age of 75 VERSUS Pap test every 2 years until the age of 100 IN Hypothetical cohort of U.S. women - age 20                                                                                                                                                                                                                                  | 70347 | 97000                                | Mandelblatt et al., 2002 (228) |
| Biennial cervical screening using liquid-based cytology where a result of ASC-US is ignored VERSUS No screening IN Women diagnosed as having atypical squamous cells of undetermined significance (ASC-US)                                                                                                                                                                                | 12300 | 17000                                | Kim et al., 2002 (229)         |
| Biennial cervical screening using conventional cytology where a result of ASC-US is ignored VERSUS No screening IN Women diagnosed as having atypical squamous cells of undetermined significance (ASC-US)                                                                                                                                                                                | 10800 | 15000                                | Kim et al., 2002 (229)         |
| Biennial cervical screening using conventional cytology (where results reflect the unstratified category of ASC) where a result of ASC is ignored VERSUS No screening IN Women diagnosed as having atypical squamous cells of undetermined significance (ASC-US)                                                                                                                          | 11000 | 15000                                | Kim et al., 2002 (229)         |
| Biennial cervical screening using conventional cytology with 2- visit HPV DNA testing VERSUS Biennial cervical screening using conventional cytology with HPV DNA testing IN Women diagnosed as having atypical squamous cells of undetermined significance (ASC-US)                                                                                                                      |       | Increases Costs,<br>Decreases Health | Kim et al., 2002 (229)         |
| Biennial cervical screening using conventional cytology (where results reflect the unstratified category of ASC) with HPV DNA testing VERSUS Biennial cervical screening using conventional cytology (where results reflect the unstratified category of ASC) where a result of ASC is ignored IN Women diagnosed as having atypical squamous cells of undetermined significance (ASC-US) | 20400 | 28000                                | Kim et al., 2002 (229)         |
| Biennial cervical screening using conventional cytology with HPV DNA testing VERSUS Biennial cervical screening using conventional cytology where a result of ASC-US is ignored IN Women diagnosed as having atypical squamous cells of undetermined significance (ASC-US)                                                                                                                | 28200 | 39000                                | Kim et al., 2002 (229)         |
| Biennial cervical screening using liquid based cytology with HPV DNA testing VERSUS Biennial cervical screening using liquid based cytology where a result of ASC-US is ignored IN Women diagnosed as having atypical squamous cells of undetermined significance (ASC-US)                                                                                                                | 36100 | 50000                                | Kim et al., 2002 (229)         |

**Appendix**  
**Cost-Utility Analysis of Cancer Prevention, Treatment, and Control: A Systematic Review**  
**Winn et al.**

|                                                                                                                                                                                                                                                                         |        |        |                                      |                                      |
|-------------------------------------------------------------------------------------------------------------------------------------------------------------------------------------------------------------------------------------------------------------------------|--------|--------|--------------------------------------|--------------------------------------|
| Biennial cervical screening using liquid based cytology with repeat cytology VERSUS Biennial cervical screening using liquid based cytology with HPV DNA testing IN Women diagnosed as having atypical squamous cells of undetermined significance (ASC-US)             |        |        | Increases Costs,<br>Decreases Health | Kim et al., 2002 (229)               |
| Biennial cervical screening using conventional cytology with repeat cytology VERSUS Biennial cervical screening using conventional cytology with HPV DNA testing IN Women diagnosed as having atypical squamous cells of undetermined significance (ASC-US)             |        |        | Increases Costs,<br>Decreases Health | Kim et al., 2002 (229)               |
| Biennial cervical screening using conventional cytology with immediate colposcopy VERSUS Biennial cervical screening using conventional cytology with HPV DNA testing IN Women diagnosed as having atypical squamous cells of undetermined significance (ASC-US)        | 433800 | 600000 |                                      | Kim et al., 2002 (229)               |
| Biennial cervical screening using liquid based cytology with immediate colposcopy VERSUS Biennial cervical screening using liquid based cytology with reflex HPV DNA testing IN Women diagnosed as having atypical squamous cells of undetermined significance (ASC-US) | 667300 | 920000 |                                      | Kim et al., 2002 (229)               |
| Universal vaccination against high-risk human papillomavirus (HPV) infection VERSUS No vaccination IN Hypothetical cohort of 12 year old girls in the US                                                                                                                | 22755  | 30000  |                                      | Sanders et al., 2003 (230)           |
| HPV vaccines and screening every 5 years starting at age 30 VERSUS No vaccination, conventional screening every 5 years starting at age 25 IN Adolescent girls                                                                                                          | 17300  | 23000  |                                      | Goldie et al., 2004 (231)            |
| HPV vaccines at age 12, triennial screening starting at age 25 VERSUS Vaccination and screening every 5 years starting at age 21 IN Adolescent girls - age 12+                                                                                                          | 58500  | 77000  |                                      | Goldie et al., 2004 (231)            |
| Screening and quadrivalent HPV vaccine VERSUS HPV screening only IN Women aged 25-64 years in United Kingdom                                                                                                                                                            | 38335  | 46000  |                                      | Kulasingam et al., 2008 (232)        |
| Triennial cytology with HPV test triage VERSUS Next best strategy IN Unvaccinated women for HPV-16,18                                                                                                                                                                   | 78000  | 98000  |                                      | Goldhaber-Fiebert et al., 2008 (233) |
| Triennial cytology with HPV test triage VERSUS Next best strategy IN Girls vaccinated before age 12 years                                                                                                                                                               | 41000  | 51000  |                                      | Goldhaber-Fiebert et al., 2008 (233) |
| Triennial cytology with HPV test triage VERSUS Next best strategy IN Girls vaccinated before age 12 years                                                                                                                                                               | 188000 | 240000 |                                      | Goldhaber-Fiebert et al., 2008 (233) |

**Appendix**  
**Cost-Utility Analysis of Cancer Prevention, Treatment, and Control: A Systematic Review**  
**Winn et al.**

|                                                                                                                                                                                                                                                                                                                                         |       |       |                            |
|-----------------------------------------------------------------------------------------------------------------------------------------------------------------------------------------------------------------------------------------------------------------------------------------------------------------------------------------|-------|-------|----------------------------|
| Referral of women to colposcopy following a single mildly dyskaryotic smear in a setting in which screening is performed every 3 years<br>VERSUS Previous national recommendation was to rescreen 6 months after the initial screen in the primary care center IN Women with a mildly abnormal cervical smear result (mild dyskaryosis) | 35788 | 46000 | Hadwin et al., 2008 (234)  |
| Referral of women to colposcopy following a single mildly dyskaryotic smear in a setting in which screening is performed every 5 years<br>VERSUS Previous national recommendation was to rescreen 6 months after the initial screen in the primary care center IN Women with a mildly abnormal cervical smear result (mild dyskaryosis) | 10207 | 13000 | Hadwin et al., 2008 (234)  |
| Referral of women to colposcopy following a single mildly dyskaryotic smear in a setting in which screening is performed based on age<br>VERSUS Previous national recommendation was to rescreen 6 months after the initial screen in the primary care center IN Women with a mildly abnormal cervical smear result (mild dyskaryosis)  | 22030 | 28000 | Hadwin et al., 2008 (234)  |
| Quadrivalent Human Papillomavirus Vaccine VERSUS No vaccination IN 12 year old girls in Taiwan                                                                                                                                                                                                                                          | 13458 | 16000 | Dasbach et al., 2008 (235) |
| Quadrivalent Human Papillomavirus Vaccine + catch up program for 12-24 females VERSUS No vaccination IN 12 year old girls in Taiwan                                                                                                                                                                                                     | 12630 | 15000 | Dasbach et al., 2008 (235) |
| Routine quadrivalent human papillomavirus (HPV) vaccination in females aged 12 years and catch-up in females aged 12-24 years VERSUS None IN Females in Norway                                                                                                                                                                          | 9887  | 12000 | Dasbach et al., 2008 (236) |
| Routine quadrivalent human papillomavirus (HPV) vaccination in females aged 12 years VERSUS None IN Females in Norway                                                                                                                                                                                                                   | 7498  | 8800  | Dasbach et al., 2008 (236) |
| Polyvalent (type-16/18) vaccination against HPV among 12-year olds (assuming 95% efficacy, 85% coverage, lifetime protection), with screening VERSUS Screening only for cervical cancer, followed by usual care if positively diagnosed IN Women aged 12 to 100 years of age within the Netherlands healthcare system.                  | 24409 | 29000 | Coupé et al., 2009 (237)   |

**Appendix**  
**Cost-Utility Analysis of Cancer Prevention, Treatment, and Control: A Systematic Review**  
**Winn et al.**

|                                                                                                                                                                                                                                                                                                                                                                                  |       |       |                          |
|----------------------------------------------------------------------------------------------------------------------------------------------------------------------------------------------------------------------------------------------------------------------------------------------------------------------------------------------------------------------------------|-------|-------|--------------------------|
| Polyvalent (type-16/18) vaccination against HPV among 12-year olds (assuming 98% efficacy, 85% coverage, lifetime protection), with screening VERSUS Screening only for cervical cancer, followed by usual care if positively diagnosed IN Women aged 12 to 100 years of age within the Netherlands healthcare system.                                                           | 23309 | 27000 | Coupé et al., 2009 (237) |
| Polyvalent (type-16/18) vaccination against HPV among 12-year olds (assuming 90% efficacy, 85% coverage, lifetime protection), with screening VERSUS Screening only for cervical cancer, followed by usual care if positively diagnosed IN Women aged 12 to 100 years of age within the Netherlands healthcare system.                                                           | 26123 | 31000 | Coupé et al., 2009 (237) |
| Polyvalent (type-16/18) vaccination against HPV among 12-year olds (assuming 95% efficacy, 85% coverage, Slow waning vaccination), with screening VERSUS Screening only for cervical cancer, followed by usual care if positively diagnosed IN Women aged 12 to 100 years of age within the Netherlands healthcare system.                                                       | 30302 | 36000 | Coupé et al., 2009 (237) |
| Polyvalent (type-16/18) vaccination against HPV among 12-year olds (assuming 95% efficacy, 85% coverage, Intermediate waning vaccination), with screening VERSUS Screening only for cervical cancer, followed by usual care if positively diagnosed IN Women aged 12 to 100 years of age within the Netherlands healthcare system.                                               | 35003 | 41000 | Coupé et al., 2009 (237) |
| Polyvalent (type-16/18) vaccination against HPV among 12-year olds (assuming 95% efficacy, 85% coverage, Fast waning vaccination), with screening VERSUS Screening only for cervical cancer, followed by usual care if positively diagnosed IN Women aged 12 to 100 years of age within the Netherlands healthcare system.                                                       | 44379 | 52000 | Coupé et al., 2009 (237) |
| Polyvalent (type-16/18) vaccination against HPV among 12-year olds (assuming 95% efficacy, Low cross-protection vaccination (50% efficacy type 31/45), 85% coverage, lifetime coverage), with screening VERSUS Screening only for cervical cancer, followed by usual care if positively diagnosed IN Women aged 12 to 100 years of age within the Netherlands healthcare system. | 22847 | 27000 | Coupé et al., 2009 (237) |

**Appendix**  
**Cost-Utility Analysis of Cancer Prevention, Treatment, and Control: A Systematic Review**  
**Winn et al.**

|                                                                                                                                                                                                                                                                                                                                                                                   |       |             |                                   |
|-----------------------------------------------------------------------------------------------------------------------------------------------------------------------------------------------------------------------------------------------------------------------------------------------------------------------------------------------------------------------------------|-------|-------------|-----------------------------------|
| Polyvalent (type-16/18) vaccination against HPV among 12-year olds (assuming 95% efficacy, High cross-protection vaccination (90% efficacy type 31/45), 85% coverage, lifetime coverage), with screening VERSUS Screening only for cervical cancer, followed by usual care if positively diagnosed IN Women aged 12 to 100 years of age within the Netherlands healthcare system. | 21944 | 26000       | Coupé et al., 2009 (237)          |
| Polyvalent (type-16/18) vaccination against HPV among 12-year olds (assuming 95% efficacy, 85% coverage, lifetime coverage), with screening VERSUS Screening only for cervical cancer, followed by usual care if positively diagnosed IN Women aged 12 to 100 years of age within the Netherlands healthcare system.                                                              | 24583 | 29000       | Coupé et al., 2009 (237)          |
| Polyvalent (type-16/18) vaccination against HPV among 12-year olds (assuming 95% efficacy, 85% coverage, lifetime coverage), with screening VERSUS Screening only for cervical cancer, followed by usual care if positively diagnosed IN Women aged 12 to 100 years of age within the Netherlands healthcare system.                                                              | 27042 | 32000       | Coupé et al., 2009 (237)          |
| Polyvalent (type-16/18) vaccination against HPV among 12-year olds (assuming 85% efficacy, 85% coverage, lifetime protection), with screening VERSUS Screening only for cervical cancer, followed by usual care if positively diagnosed IN Women aged 12 to 100 years of age within the Netherlands healthcare system.                                                            | 28062 | 33000       | Coupé et al., 2009 (237)          |
| Conventional cytology followed by HPV for equivocal cytology results VERSUS No screening IN Women aged 30 in South Africa                                                                                                                                                                                                                                                         | 1974  | 2300        | Vijayaraghavan et al., 2009 (238) |
| HPV DNA testing followed by cytology for HPV-positive women VERSUS No screening IN Women aged 30 in South Africa                                                                                                                                                                                                                                                                  | 2717  | 3200        | Vijayaraghavan et al., 2009 (238) |
| HPV DNA testing followed by colposcopy for all HPV-positive women VERSUS No screening IN Women aged 30 in South Africa                                                                                                                                                                                                                                                            | 2224  | 2600        | Vijayaraghavan et al., 2009 (238) |
| Simultaneous HPV DNA testing and conventional cytology co-screening VERSUS Conventional cytology IN Women aged 30 in South Africa                                                                                                                                                                                                                                                 | 2320  | 2700        | Vijayaraghavan et al., 2009 (238) |
| Conventional cytology followed by HPV triage for equivocal cytology results VERSUS Conventional cytology IN Women aged 30 in South Africa                                                                                                                                                                                                                                         | -412  | Cost-Saving | Vijayaraghavan et al., 2009 (238) |



**Appendix**  
**Cost-Utility Analysis of Cancer Prevention, Treatment, and Control: A Systematic Review**  
**Winn et al.**

|                                                                                                                                                                                                                                                                       |       |       |                                   |
|-----------------------------------------------------------------------------------------------------------------------------------------------------------------------------------------------------------------------------------------------------------------------|-------|-------|-----------------------------------|
| HPV DNA testing followed by cytology for HPV-positive women VERSUS Conventional cytology IN Women aged 30 in South Africa                                                                                                                                             | 1233  | 1400  | Vijayaraghavan et al., 2009 (238) |
| HPV DNA testing followed by colposcopy for all HPV-positive women VERSUS Conventional cytology IN Women aged 30 in South Africa                                                                                                                                       | 972   | 1100  | Vijayaraghavan et al., 2009 (238) |
| Simultaneous HPV DNA testing abd conventional cytology co-screening VERSUS Conventional cytology IN Women aged 30 in South Africa                                                                                                                                     | 1196  | 1400  | Vijayaraghavan et al., 2009 (238) |
| Conventional cytology VERSUS No screening IN Women aged 30 in South Africa                                                                                                                                                                                            | 6246  | 7300  | Vijayaraghavan et al., 2009 (238) |
| Quadrivalent human papillomavirus (HPV) vaccine (versus types 6, 11, 16, 18) and cervical cancer screening VERSUS Cervical cancer screening only (rates based on existing screening program in Belgium) IN Belgian females aged 12-85 years                           | 13249 | 16000 | Annemans et al., 2009 (239)       |
| Three doses of the HPV vaccine administered at the age of 12 years plus one booster is given 10 years after the initial vaccination VERSUS Screening strategy in Belgium, 3-yearly screening of women between 25 and 64 years of age IN Belgian females aged 12 years | 36141 | 42000 | Thiry et al., 2009 (240)          |
| Three doses of the HPV vaccine administered at the age of 12 years with vaccine lifelong protection VERSUS Screening strategy in Belgium, 3-yearly screening of women between 25 and 64 years of age IN Belgian females aged 12 years                                 | 18068 | 21000 | Thiry et al., 2009 (240)          |
| Vaccinating girls and women aged 12 to 24 years old VERSUS Vaccinating girls and women aged 12 to 19 years old IN US sexually-active population                                                                                                                       | 10986 | 13000 | Elbasha et al., 2009 (241)        |
| Cytological screening for HPV and cervical cancer (4 times between age 30 and 60) VERSUS No screening IN Women in the Netherlands after 16/18 HPV vaccination                                                                                                         | 3351  | 3900  | Coupé et al., 2009 (242)          |
| Universal vaccination of all 12 year old females VERSUS Current practice IN 12 year old females in Argentina                                                                                                                                                          | 5964  | 7000  | Colantonio et al., 2009 (243)     |
| Universal vaccination of all 12 year old females VERSUS Current practice IN 12 year old females in Brazil                                                                                                                                                             | 10181 | 12000 | Colantonio et al., 2009 (243)     |
| Universal vaccination of all 12 year old females VERSUS Current practice IN 12 year old females in Chile                                                                                                                                                              | 17666 | 21000 | Colantonio et al., 2009 (243)     |

**Appendix**  
**Cost-Utility Analysis of Cancer Prevention, Treatment, and Control: A Systematic Review**  
**Winn et al.**

|                                                                                                                                                                                                                                                                                                              |       |             |                                  |
|--------------------------------------------------------------------------------------------------------------------------------------------------------------------------------------------------------------------------------------------------------------------------------------------------------------|-------|-------------|----------------------------------|
| Universal vaccination of all 12 year old females VERSUS Current practice IN 12 year old females in Mexico                                                                                                                                                                                                    | 10134 | 12000       | Colantonio et al., 2009 (243)    |
| Universal vaccination of all 12 year old females VERSUS Current practice IN 12 year old females in Peru                                                                                                                                                                                                      | 4576  | 5400        | Colantonio et al., 2009 (243)    |
| Referral to colposcopy with immediate treatment based on colposcopic appearance VERSUS Cytological surveillance IN Women with low grade cervical abnormalities in England. This ratio is from NHS perspective with both costs and benefits discounted at 3.5%.                                               | 8333  | 10000       | TOMBOLA Group et al., 2009 (244) |
| Referral to colposcopy for biopsy and recall if necessary VERSUS Referral to colposcopy with immediate treatment based on colposcopic appearance IN Women with low grade cervical abnormalities in Scotland. This ratio is from societal perspective with costs discounted at 3.5% but benefit undiscounted. | -669  | Cost-Saving | TOMBOLA Group et al., 2009 (244) |
| Referral to colposcopy for biopsy and recall if necessary VERSUS Cytological surveillance IN Women with low grade cervical abnormalities in England. This ratio is from NHS perspective with both costs and benefits discounted at 3.5%.                                                                     | 3233  | 4100        | TOMBOLA Group et al., 2009 (244) |
| Referral to colposcopy with immediate treatment based on colposcopic appearance VERSUS Cytological surveillance IN Women with low grade cervical abnormalities in Scotland. This ratio is from societal perspective with costs discounted at 3.5% but benefits undiscounted.                                 | 13524 | 17000       | TOMBOLA Group et al., 2009 (244) |
| Referral to colposcopy for biopsy and recall if necessary VERSUS Referral to colposcopy with immediate treatment based on colposcopic appearance IN Women with low grade cervical abnormalities in England. This ratio is from NHS perspective with both costs and benefits discounted at 3.5%.              | 48    | 60          | TOMBOLA Group et al., 2009 (244) |

**Appendix**  
**Cost-Utility Analysis of Cancer Prevention, Treatment, and Control: A Systematic Review**  
**Winn et al.**

|                                                                                                                                                                                                                                                                                                                                                                                                                                                                                                                                                                                                                                                                                                    |       |       |                                  |
|----------------------------------------------------------------------------------------------------------------------------------------------------------------------------------------------------------------------------------------------------------------------------------------------------------------------------------------------------------------------------------------------------------------------------------------------------------------------------------------------------------------------------------------------------------------------------------------------------------------------------------------------------------------------------------------------------|-------|-------|----------------------------------|
| Referral to colposcopy for biopsy and recall if necessary VERSUS Cytological surveillance IN Women with low grade cervical abnormalities in Scotland. This ratio is from societal perspective with costs discounted at 3.5% but benefit undiscounted.                                                                                                                                                                                                                                                                                                                                                                                                                                              | 4350  | 5500  | TOMBOLA Group et al., 2009 (244) |
| Vaccination of 12-year-old girls followed by screening using conventional cervical cytology is performed 3 times at 10-year intervals starting at age 30 VERSUS Screening using conventional cervical cytology is performed 3 times at 10-year intervals starting at age 30 IN Women screened for cervical cancer from societal perspective                                                                                                                                                                                                                                                                                                                                                        | 1078  | 1200  | Sinanovic et al., 2009 (245)     |
| Vaccination of 12-year-old girls followed by screening using conventional cervical cytology is performed 3 times at 10-year intervals starting at age 30 VERSUS Screening using conventional cervical cytology is performed 3 times at 10-year intervals starting at age 30 IN Women screened for cervical cancer from health care perspective                                                                                                                                                                                                                                                                                                                                                     | 1460  | 1700  | Sinanovic et al., 2009 (245)     |
| 3-year PAP (Women aged 18 to 69 are routinely screened annually with PAP) + HPV (Women with ASCUS are contacted to have an HPV-DNA as a triage test for the presence of high-risk oncogenetic HPV) + PAP-age (women 30 years of age or older who have ASCUS receive a HPV-DNA triage test.) VERSUS Annual PAP-smear + Women with ASCH, AGC, or HSIL are immediately referred for colposcopy and biopsy for histologic assessment of the cervix. Women with CIN graded greater than CIN1 have the CIN removed by a conization procedure and receive a hysterectomy. Women with ASCUS or LSIL are retested with PAP in 6 months. IN Women aged 12 --> 80 y.o. within the Canadian healthcare system. | 15048 | 17000 | Chuck et al., 2009 (246)         |

**Appendix**  
**Cost-Utility Analysis of Cancer Prevention, Treatment, and Control: A Systematic Review**  
**Winn et al.**

|                                                                                                                                                                                                                                                                                                                                                                                                                                                                                                                                                                                                                                                                                                                                                                                                                                                                                                                                     |       |       |                             |
|-------------------------------------------------------------------------------------------------------------------------------------------------------------------------------------------------------------------------------------------------------------------------------------------------------------------------------------------------------------------------------------------------------------------------------------------------------------------------------------------------------------------------------------------------------------------------------------------------------------------------------------------------------------------------------------------------------------------------------------------------------------------------------------------------------------------------------------------------------------------------------------------------------------------------------------|-------|-------|-----------------------------|
| <p>1-year PAP (Women aged 18 to 69 are routinely screened annually with PAP) + HPV (Women with ASCUS are contacted to have an HPV-DNA as a triage test for the presence of high-risk oncogenetic HPV) + PAP-age (women 30 years of age or older who have ASCUS receive a HPV-DNA triage test.) VERSUS Annual PAP-smear + Women with ASCH, AGC, or HSIL are immediately referred for colposcopy and biopsy for histologic assessment of the cervix. Women with CIN graded greater than CIN1 have the CIN removed by a conization procedure and receive a hysterectomy. Women with ASCUS or LSIL are retested with PAP in 6 months. IN Women aged 12 --&gt; 80 y.o. within the Canadian healthcare system.</p>                                                                                                                                                                                                                        | 54764 | 63000 | Chuck et al.,<br>2009 (246) |
| <p>1-year PAP (Women aged 18 to 69 are routinely screened annually with PAP) + HPV (Women with ASCUS are contacted to have an HPV-DNA as a triage test for the presence of high-risk oncogenetic HPV) + PAP (Women with CIN graded greater than CIN1 (i.e., CIN2 or CIN3) have the CIN removed by a conization procedure and receive a hysterectomy. Women with ASCUS or LSIL are retested with PAP in 6 months. Women with an unsatisfactory specimen are requested to have a repeat PAP test every 3 months until a VERSUS Annual PAP-smear + Women with ASCH, AGC, or HSIL are immediately referred for colposcopy and biopsy for histologic assessment of the cervix. Women with CIN graded greater than CIN1 have the CIN removed by a conization procedure and receive a hysterectomy. Women with ASCUS or LSIL are retested with PAP in 6 months. IN Women aged 12 --&gt; 80 y.o. within the Canadian healthcare system.</p> | 80741 | 92000 | Chuck et al.,<br>2009 (246) |

**Appendix**  
**Cost-Utility Analysis of Cancer Prevention, Treatment, and Control: A Systematic Review**  
**Winn et al.**

|                                                                                                                                                                                                                                                                                                                                                                                                                                                                                                                                                                                                                                                                                                                                                                                                                                                                                                                           |        |                                   |                          |
|---------------------------------------------------------------------------------------------------------------------------------------------------------------------------------------------------------------------------------------------------------------------------------------------------------------------------------------------------------------------------------------------------------------------------------------------------------------------------------------------------------------------------------------------------------------------------------------------------------------------------------------------------------------------------------------------------------------------------------------------------------------------------------------------------------------------------------------------------------------------------------------------------------------------------|--------|-----------------------------------|--------------------------|
| 1-year LBC (Women aged 18 to 69 are routinely screened annually with LBC (liquid-based cytology)) + HPV (Women with ASCUS are contacted to have an HPV-DNA as a triage test for the presence of high-risk oncogenetic HPV) + LBC (Women with CIN graded greater than CIN1 (i.e., CIN2 or CIN3) have the CIN removed by a conization procedure and receive a hysterectomy. Women with ASCUS or LSIL are retested with LBC in 6 months. women with an unsatisfactory specimen are requested to have a repeat LBC tes VERSUS Annual PAP-smear + Women with ASCH, AGC, or HSIL are immediately referred for colposcopy and biopsy for histologic assessment of the cervix. Women with CIN graded greater than CIN1 have the CIN removed by a conization procedure and receive a hysterectomy. Women with ASCUS or LSIL are retested with PAP in 6 months. IN Women aged 12 --> 80 y.o. within the Canadian healthcare system. | 118937 | 140000                            | Chuck et al., 2009 (246) |
| Human papilloma virus (HPV) vaccination of girls aged 12 + screening every 3 years VERSUS No vaccination + screening every 3 years IN United States boys and girls aged 12 years [vaccination 100% efficacy]                                                                                                                                                                                                                                                                                                                                                                                                                                                                                                                                                                                                                                                                                                              | 37940  | 45000                             | Kim et al., 2009 (247)   |
| No HPV vaccination + screening every 2 years VERSUS HPV vaccination of girls aged 12 + screening every 3 years IN United States boys and girls aged 12 years [vaccination 100% efficacy]                                                                                                                                                                                                                                                                                                                                                                                                                                                                                                                                                                                                                                                                                                                                  |        | Increases Costs, Decreases Health | Kim et al., 2009 (247)   |
| Vaccination of girls aged 12 + screening every 2 years VERSUS Vaccination of girls and boys aged 12 + screening every 3 years IN United States boys and girls aged 12 years [vaccination 100% efficacy]                                                                                                                                                                                                                                                                                                                                                                                                                                                                                                                                                                                                                                                                                                                   | 190780 | 220000                            | Kim et al., 2009 (247)   |
| Vaccination of girls and boys aged 12 + screening every 2 years VERSUS Vaccination of girls aged 12 + screening every 2 years IN United States boys and girls aged 12 years [vaccination 100% efficacy]                                                                                                                                                                                                                                                                                                                                                                                                                                                                                                                                                                                                                                                                                                                   | 390440 | 460000                            | Kim et al., 2009 (247)   |
| Cytology with HPV triage every year and vaccination VERSUS Cytology with HPV triage every year and no vaccination IN Women aged 35 years in the US                                                                                                                                                                                                                                                                                                                                                                                                                                                                                                                                                                                                                                                                                                                                                                        | 198362 | 230000                            | Kim et al., 2009 (248)   |
| Screening with combined cytology with HPV testing every year and vaccination VERSUS Screening with combined cytology with HPV testing every year and no vaccination IN Women aged 35 years in the US                                                                                                                                                                                                                                                                                                                                                                                                                                                                                                                                                                                                                                                                                                                      | 433385 | 510000                            | Kim et al., 2009 (248)   |

**Appendix**  
**Cost-Utility Analysis of Cancer Prevention, Treatment, and Control: A Systematic Review**  
**Winn et al.**

|                                                                                                                                                                                                            |        |        |                        |
|------------------------------------------------------------------------------------------------------------------------------------------------------------------------------------------------------------|--------|--------|------------------------|
| Screening with combined cytology with HPV testing every 2 years and vaccination VERSUS Screening with combined cytology with HPV testing every 2 years and no vaccination IN Women aged 35 years in the US | 193568 | 230000 | Kim et al., 2009 (248) |
| Screening with combined cytology with HPV testing every 3 years and vaccination VERSUS Screening with combined cytology with HPV testing every 3 years and no vaccination IN Women aged 35 years in the US | 131832 | 150000 | Kim et al., 2009 (248) |
| Screening with combined cytology with HPV testing every 4 years and vaccination VERSUS Screening with combined cytology with HPV testing every 4 years and no vaccination IN Women aged 35 years in the US | 99905  | 120000 | Kim et al., 2009 (248) |
| Screening with combined cytology with HPV testing every 5 years and vaccination VERSUS Screening with combined cytology with HPV testing every 5 years and no vaccination IN Women aged 35 years in the US | 78751  | 92000  | Kim et al., 2009 (248) |
| Screening with combined cytology with HPV testing every 1 years and vaccination VERSUS Screening with combined cytology with HPV testing every 1 years and no vaccination IN Women aged 45 years in the US | 448989 | 530000 | Kim et al., 2009 (248) |
| Screening with combined cytology with HPV testing every 2 years and vaccination VERSUS Screening with combined cytology with HPV testing every 2 years and no vaccination IN Women aged 45 years in the US | 269217 | 320000 | Kim et al., 2009 (248) |
| Screening with combined cytology with HPV testing every 3 years and vaccination VERSUS Screening with combined cytology with HPV testing every 3 years and no vaccination IN Women aged 45 years in the US | 186886 | 220000 | Kim et al., 2009 (248) |
| Screening with combined cytology with HPV testing every 4 years and vaccination VERSUS Screening with combined cytology with HPV testing every 4 years and no vaccination IN Women aged 45 years in the US | 140658 | 170000 | Kim et al., 2009 (248) |
| Screening with combined cytology with HPV testing every 5 years and vaccination VERSUS Screening with combined cytology with HPV testing every 5 years and no vaccination IN Women aged 45 years in the US | 108416 | 130000 | Kim et al., 2009 (248) |
| Cytology with HPV triage every 1 year and vaccination VERSUS Cytology with HPV triage every 1 year and no vaccination IN Women aged 45 years in the US                                                     | 272346 | 320000 | Kim et al., 2009 (248) |

**Appendix**  
**Cost-Utility Analysis of Cancer Prevention, Treatment, and Control: A Systematic Review**  
**Winn et al.**

|                                                                                                                                                                |       |       |                                   |                              |
|----------------------------------------------------------------------------------------------------------------------------------------------------------------|-------|-------|-----------------------------------|------------------------------|
| Cytology with HPV triage every 4 years and vaccination VERSUS Cytology with HPV triage every 4 years and no vaccination IN Women aged 45 years in the US       |       |       | Increases Costs, Decreases Health | Kim et al., 2009 (248)       |
| Cytology with HPV triage every 5 years and vaccination VERSUS Cytology with HPV triage every 5 years and no vaccination IN Women aged 45 years in the US       |       |       | Increases Costs, Decreases Health | Kim et al., 2009 (248)       |
| Quadrivalent human papillomavirus (HPV) against HPV types 6, 11, 16 and 18 VERSUS No vaccination IN 12-year old Irish females                                  | 31846 | 37000 |                                   | Dee et al., 2009 (249)       |
| Bivalent human papillomavirus (HPV) against HPV types 16 and 18 VERSUS No vaccination IN 12-year old Irish females                                             | 38267 | 45000 |                                   | Dee et al., 2009 (249)       |
| Human papillomavirus (HPV) vaccine against HPV types 16, 18, with no herd immunity VERSUS No vaccination IN 12 year old Canadian females                       | 27950 | 33000 |                                   | Anonychuk et al., 2009 (250) |
| Human papillomavirus (HPV) vaccine against HPV types 16, 18, and cross protection, with no herd immunity VERSUS No vaccination IN 12 year old Canadian females | 23769 | 28000 |                                   | Anonychuk et al., 2009 (250) |
| Human papillomavirus (HPV) vaccine against HPV types 16, 18, with herd immunity VERSUS No vaccination IN 12 year old Canadian females                          | 24564 | 29000 |                                   | Anonychuk et al., 2009 (250) |
| Human papillomavirus (HPV) vaccine against HPV types 16, 18, and cross protection, with herd immunity VERSUS No vaccination IN 12 year old Canadian females    | 16470 | 19000 |                                   | Anonychuk et al., 2009 (250) |
| Human papillomavirus (HPV) vaccination VERSUS None IN Population of 12-year-old girls in the Icelandic population.                                             | 23    | 27    |                                   | Oddsson et al., 2009 (251)   |
| Human papilloma virus vaccination against HPV-16 and HPV-18 VERSUS No vaccination IN Taiwanese girls aged 12+ years old.                                       | 13674 | 15000 |                                   | Liu et al., 2010 (252)       |

**Appendix**  
**Cost-Utility Analysis of Cancer Prevention, Treatment, and Control: A Systematic Review**  
**Winn et al.**

|                                                                                                                                                                                                                                                                                                                                    |       |       |                               |
|------------------------------------------------------------------------------------------------------------------------------------------------------------------------------------------------------------------------------------------------------------------------------------------------------------------------------------|-------|-------|-------------------------------|
| Quadrivalent human papillomavirus vaccine (6/11/16/18) at age 12<br>VERSUS Quadrivalent human papillomavirus vaccine (6/11/16/18) at age<br>12 plus a temporary catch-up program for girls and women aged 12-24 IN<br>Girls aged 12 years in Hungary                                                                               | 13374 | 16000 | Dasbach et al.,<br>2010 (253) |
| Quadrivalent human papillomavirus vaccine (6/11/16/18) at age 12<br>VERSUS No vaccination IN Girls aged 12 years in Hungary                                                                                                                                                                                                        | 12032 | 14000 | Dasbach et al.,<br>2010 (253) |
| HPV with cytology triage VERSUS Cytology every 5 years IN Dutch<br>women age 30-60 years                                                                                                                                                                                                                                           | 12758 | 15000 | Berkhof et al.,<br>2010 (254) |
| Combined HPV with cytology VERSUS Cytology every 5 years IN Dutch<br>women age 30-60 years                                                                                                                                                                                                                                         | 22352 | 26000 | Berkhof et al.,<br>2010 (254) |
| Cytology with HPV triage VERSUS Cytology every 5 years IN Dutch<br>women age 30-60 years                                                                                                                                                                                                                                           | 5423  | 6200  | Berkhof et al.,<br>2010 (254) |
| Bivalent (HPV 16, 18) human papilloma virus vaccination, plus screening<br>for HPV as presently performed in Italy VERSUS Screening for HPV<br>(human papilloma virus) as presently performed in Italy IN Italian girls<br>aged approximately 12 y.o.                                                                              | 26597 | 29000 | Torre et al., 2010<br>(255)   |
| Prophylactic cervical cancer vaccination VERSUS No vaccination IN<br>Twelve-year-old girls in Japan                                                                                                                                                                                                                                | 15567 | 18000 | Konno et al.,<br>2010 (256)   |
| Annual HPV vaccination of 12-year-old girls (70% vaccination rate, 100%<br>efficacy) VERSUS Current Danish strategy, which includes a cervical<br>cancer screening program for women aged 23-59 years who are offered<br>screening every 3 years IN Danish population aged 17-78 years                                             | 2628  | 3000  | Olsen et al.,<br>2010 (257)   |
| Annual HPV vaccination of 12-year-old girls with catch-up to 15 years in<br>the first vaccination year (70% vaccination rate) VERSUS Current Danish<br>strategy, which includes a cervical cancer screening program for women<br>aged 23-59 years who are offered screening every 3 years IN Danish<br>population aged 17-78 years | 4160  | 4700  | Olsen et al.,<br>2010 (257)   |



**Appendix**  
**Cost-Utility Analysis of Cancer Prevention, Treatment, and Control: A Systematic Review**  
**Winn et al.**

|                                                                                                                                                                                                                                                                                          |        |             |                                    |
|------------------------------------------------------------------------------------------------------------------------------------------------------------------------------------------------------------------------------------------------------------------------------------------|--------|-------------|------------------------------------|
| Annual HPV vaccination of 12-year-old girls and boys (70% vaccination rate) VERSUS Current Danish strategy, which includes a cervical cancer screening program for women aged 23-59 years who are offered screening every 3 years IN Danish population aged 17-78 years                  | 25607  | 29000       | Olsen et al., 2010 (257)           |
| Current screening and vaccination against human papillomavirus (HPV) 16/18 VERSUS Current screening: Pap smear only IN Finnish girls aged 10 years                                                                                                                                       | 21726  | 26000       | Torvinen et al., 2010 (258)        |
| Quadrivalent human papillomavirus (HPV) vaccine B- lifetime protection against HPV types 18 and low-risk HPV types 6 and 11 VERSUS Bivalent human papillomavirus (HPV) vaccine B- lifetime protection against HPV types 16 and 18 IN 12 year old girls in Ireland                        | -33540 | Cost-Saving | Demarteau et al., 2010 (259)       |
| Quadrivalent human papillomavirus (HPV) vaccine B- lifetime protection against HPV types 18 and low-risk HPV types 6 and 11 VERSUS Bivalent human papillomavirus (HPV) vaccine B- lifetime protection against HPV types 16 and 18 IN 12 year old girls in Italy                          |        | Cost-Saving | Demarteau et al., 2010 (259)       |
| Quadrivalent human papillomavirus (HPV) vaccine B- lifetime protection against HPV types 18 and low-risk HPV types 6 and 11 VERSUS Bivalent human papillomavirus (HPV) vaccine B- lifetime protection against HPV types 16 and 18 IN 12 year old girls in France                         | -28705 | Cost-Saving | Demarteau et al., 2010 (259)       |
| Triennial Cervical Human Papillomavirus DNA testing VERSUS Triennial vaginal Human Papillomavirus screening with cytology triage IN Women aged between 18 and 50 years old, not pregnant, not chronically immunocompromised, and reported no previous treatments for cervical neoplasia. | 238706 | 270000      | Balasubramanian et al., 2010 (260) |
| Triennial vaginal Human Papillomavirus screening with cytology triage VERSUS Screening IN Women aged between 18 and 50 years old, not pregnant, not chronically immunocompromised, and reported no previous treatments for cervical neoplasia.                                           | 9871   | 11000       | Balasubramanian et al., 2010 (260) |

**Appendix**  
**Cost-Utility Analysis of Cancer Prevention, Treatment, and Control: A Systematic Review**  
**Winn et al.**

|                                                                                                                                                                                                                                                                                       |       |       |                                    |
|---------------------------------------------------------------------------------------------------------------------------------------------------------------------------------------------------------------------------------------------------------------------------------------|-------|-------|------------------------------------|
| Biennial Human Papillomavirus DNA screening VERSUS Triennial Human Papillomavirus DNA screening IN Women aged between 18 and 50 years old, not pregnant, not chronically immunocompromised, and reported no previous treatments for cervical neoplasia.                               | 70151 | 80000 | Balasubramanian et al., 2010 (260) |
| Triennial cytology VERSUS No screening IN Women aged between 18 and 50 years old, not pregnant, not chronically immunocompromised, and reported no previous treatments for cervical neoplasia.                                                                                        | 12878 | 15000 | Balasubramanian et al., 2010 (260) |
| Biennial cytology VERSUS No screening IN Women aged between 18 and 50 years old, not pregnant, not chronically immunocompromised, and reported no previous treatments for cervical neoplasia.                                                                                         | 18051 | 21000 | Balasubramanian et al., 2010 (260) |
| PAP smear program to detect cervical cancer (70% coverage) VERSUS PAP smear program (40% coverage) IN Women diagnosed with cervical changes for at least six months in Malaysia                                                                                                       | 285   | 310   | Ezat et al., 2010 (261)            |
| Combined strategy- quadrivalent human papillomavirus (HPV) vaccine plus PAP smear for elderly women till age of 65 years VERSUS PAP smear program (70% coverage) IN Women diagnosed with cervical changes for at least six months in Malaysia                                         | 10641 | 12000 | Ezat et al., 2010 (261)            |
| Human Papillomavirus (HPV) vaccination with current cervical cancer screening program VERSUS Current cervical cancer screening program IN 12-year old girls in Slovenia                                                                                                               | 34131 | 38000 | Obradovic et al., 2010 (262)       |
| Screening using liquid-based cytology every two years, followed by HPV DNA testing for all patients with equivocal results on cytology (ASCUS) VERSUS No screening IN US adolescent and young adult women aged over 14 years potentially exposed to HPV 16/18 through sexual activity | 19376 | 22000 | Vijayaraghavan et al., 2010 (263)  |

**Appendix**  
**Cost-Utility Analysis of Cancer Prevention, Treatment, and Control: A Systematic Review**  
**Winn et al.**

|                                                                                                                                                                                                                                                                                                                                                                                                       |       |       |                                   |
|-------------------------------------------------------------------------------------------------------------------------------------------------------------------------------------------------------------------------------------------------------------------------------------------------------------------------------------------------------------------------------------------------------|-------|-------|-----------------------------------|
| Screening using a combination of simultaneous liquid-based cytology and HPV DNA testing every three years, with reflex HPV genotyping and more intensive follow-up for HPV types 16/18 VERSUS No screening IN US adolescent and young adult women aged over 14 years potentially exposed to HPV 16/18 through sexual activity                                                                         | 19420 | 22000 | Vijayaraghavan et al., 2010 (263) |
| Screening using liquid-based cytology every two years, followed by HPV DNA testing for all patients with equivocal results on cytology (ASCUS) VERSUS Screening using liquid-based cytology every two years IN US adolescent and young adult women aged over 14 years potentially exposed to HPV 16/18 through sexual activity                                                                        | 21304 | 24000 | Vijayaraghavan et al., 2010 (263) |
| Primary screening using HPV DNA testing every three years, followed by cytology for all women with positive result on HPV VERSUS Screening using liquid-based cytology every two years, followed by HPV DNA testing for all patients with equivocal results on cytology (ASCUS) IN US adolescent and young adult women aged over 14 years potentially exposed to HPV 16/18 through sexual activity    | 2618  | 3000  | Vijayaraghavan et al., 2010 (263) |
| Screening using a combination of simultaneous cytology and HPV DNA testing every three years VERSUS Primary screening using HPV DNA testing every three years, followed by cytology for all women with positive result on HPV IN US adolescent and young adult women aged over 14 years potentially exposed to HPV 16/18 through sexual activity                                                      | 17204 | 20000 | Vijayaraghavan et al., 2010 (263) |
| Screening for HPV 16/18 using HPV DNA testing every three years, followed by reflex HPV genotyping for all HPV-positive women and more intensive follow-up for HPV types 16/18 VERSUS Screening using a combination of simultaneous cytology and HPV DNA testing every three years IN US adolescent and young adult women aged over 14 years potentially exposed to HPV 16/18 through sexual activity | 34074 | 39000 | Vijayaraghavan et al., 2010 (263) |

**Appendix**  
**Cost-Utility Analysis of Cancer Prevention, Treatment, and Control: A Systematic Review**  
**Winn et al.**

|                                                                                                                                                                                                                                                                                                                                                                                                                                                                                    |       |       |                                   |
|------------------------------------------------------------------------------------------------------------------------------------------------------------------------------------------------------------------------------------------------------------------------------------------------------------------------------------------------------------------------------------------------------------------------------------------------------------------------------------|-------|-------|-----------------------------------|
| Screening using a combination of simultaneous cytology and HPV DNA testing every three years, with reflex HPV genotyping and more intensive follow-up for HPV types 16/18 VERSUS Screening for HPV 16/18 using HPV DNA testing every three years, followed by reflex HPV genotyping for all HPV-positive women and more intensive follow-up for HPV types 16/18 IN US adolescent and young adult women aged over 14 years potentially exposed to HPV 16/18 through sexual activity | 33807 | 39000 | Vijayaraghavan et al., 2010 (263) |
| Liquid-based cytology every two years to screen for HPV 16/18 VERSUS No screening IN US adolescent and young adult women aged over 14 years potentially exposed to HPV 16/18 through sexual activity                                                                                                                                                                                                                                                                               | 19321 | 22000 | Vijayaraghavan et al., 2010 (263) |
| Primary screening using HPV DNA testing every three years, followed by liquid-based cytology testing for all women with positive result on HPV VERSUS No screening IN US adolescent and young adult women aged over 14 years potentially exposed to HPV 16/18 through sexual activity                                                                                                                                                                                              | 18980 | 22000 | Vijayaraghavan et al., 2010 (263) |
| Screening using a combination of simultaneous liquid-based cytology testing and HPV DNA testing every three years VERSUS No screening IN US adolescent and young adult women aged over 14 years potentially exposed to HPV 16/18 through sexual activity                                                                                                                                                                                                                           | 18903 | 22000 | Vijayaraghavan et al., 2010 (263) |
| Screening Using HPV DNA testing every three years, followed by reflex HPV genotyping for all HPV-positive women and more intensive follow-up for HPV types 16/18 VERSUS No screening IN US adolescent and young adult women aged over 14 years potentially exposed to HPV 16/18 through sexual activity                                                                                                                                                                            | 19092 | 22000 | Vijayaraghavan et al., 2010 (263) |
| Conventional cytology every 1-3 years with repeat screening for atypical squamous cells of undetermined significance (ASCUS) results VERSUS No screening IN Women aged 30 years or older in Canada                                                                                                                                                                                                                                                                                 | 9510  | 11000 | Vijayaraghavan et al., 2010 (264) |
| Conventional cytology with human papillomavirus (HPV) testing to triage atypical squamous cells of undetermined significance (ASCUS) and cytology every 1-3 years VERSUS No screening IN Women aged 30 years or older in Canada                                                                                                                                                                                                                                                    | 9000  | 10000 | Vijayaraghavan et al., 2010 (264) |

**Appendix**  
**Cost-Utility Analysis of Cancer Prevention, Treatment, and Control: A Systematic Review**  
**Winn et al.**

|                                                                                                                                                                                                                             |         |             |                                   |
|-----------------------------------------------------------------------------------------------------------------------------------------------------------------------------------------------------------------------------|---------|-------------|-----------------------------------|
| Human papillomavirus (HPV) testing for every 3 years in high-risk patients followed by colposcopy for triage of HPV-positive women VERSUS No screening IN Women aged 30 years or older in Canada                            | 11843   | 14000       | Vijayaraghavan et al., 2010 (264) |
| Human papillomavirus (HPV) testing for every 3 years in high-risk patients with use of cytology for triage of HPV-positive women VERSUS No screening IN Women aged 30 years or older in Canada                              | 9288    | 11000       | Vijayaraghavan et al., 2010 (264) |
| Co-screening with human papillomavirus (HPV) testing and cytology every 3 years VERSUS No screening IN Women aged 30 years or older in Canada                                                                               | 9985    | 11000       | Vijayaraghavan et al., 2010 (264) |
| Conventional cytology with human papillomavirus (HPV) testing to triage atypical squamous cells of undetermined significance (ASCUS) and cytology annually VERSUS No screening IN Women aged 30 years or older in Canada    | 11603   | 13000       | Vijayaraghavan et al., 2010 (264) |
| Human papillomavirus (HPV) testing every 1-3 years VERSUS No screening IN Women aged 30 years or older in Canada                                                                                                            | 9231    | 11000       | Vijayaraghavan et al., 2010 (264) |
| Human papillomavirus (HPV) testing every 1-3 years VERSUS Annual cytology IN Women aged 30 years or older in Canada                                                                                                         | -79916  | Cost-Saving | Vijayaraghavan et al., 2010 (264) |
| Human papillomavirus (HPV) testing for every 3 years in high-risk patients followed by colposcopy for triage of HPV-positive women VERSUS Annual cytology IN Women aged 30 years or older in Canada                         | -273766 | Cost-Saving | Vijayaraghavan et al., 2010 (264) |
| Co-screening with HPV testing and cytology every 3 years VERSUS Annual cytology IN Women aged 30 years or older in Canada                                                                                                   | -194210 | Cost-Saving | Vijayaraghavan et al., 2010 (264) |
| Conventional cytology with human papillomavirus (HPV) testing to triage atypical squamous cells of undetermined significance (ASCUS) and cytology annually VERSUS Annual cytology IN Women aged 30 years or older in Canada | 3403    | 3900        | Vijayaraghavan et al., 2010 (264) |

**Appendix**  
**Cost-Utility Analysis of Cancer Prevention, Treatment, and Control: A Systematic Review**  
**Winn et al.**

|                                                                                                                                                                                                                                                                            |       |             |                                   |
|----------------------------------------------------------------------------------------------------------------------------------------------------------------------------------------------------------------------------------------------------------------------------|-------|-------------|-----------------------------------|
| Conventional cytology with human papillomavirus (HPV) testing to triage atypical squamous cells of undetermined significance (ASCUS) and cytology every 1-3 years VERSUS Cytology every 3 years IN Women aged 30 years or older in Canada                                  | -1478 | Cost-Saving | Vijayaraghavan et al., 2010 (264) |
| Annual cytology to detect cervical cancer VERSUS Cytology every 3 years IN Women aged 30 years or older in Canada                                                                                                                                                          | 25701 | 29000       | Vijayaraghavan et al., 2010 (264) |
| Human papillomavirus (HPV) testing for every 3 years in high-risk patients with use of cytology for triage of HPV-positive women VERSUS Cytology every 3 years IN Women aged 30 years or older in Canada                                                                   | 7823  | 8900        | Vijayaraghavan et al., 2010 (264) |
| Co-screening with human papillomavirus (HPV) testing and cytology every 3 years VERSUS Cytology every 3 years IN Women aged 30 years or older in Canada                                                                                                                    | 12573 | 14000       | Vijayaraghavan et al., 2010 (264) |
| Conventional cytology with human papillomavirus (HPV) testing to triage atypical squamous cells of undetermined significance (ASCUS) and cytology annually VERSUS Cytology every 3 years IN Women aged 30 years or older in Canada                                         | 22387 | 26000       | Vijayaraghavan et al., 2010 (264) |
| Human papillomavirus (HPV) testing only every 3 years VERSUS Cytology every 3 years IN Women aged 30 years or older in Canada                                                                                                                                              | 7635  | 8700        | Vijayaraghavan et al., 2010 (264) |
| Treatment with cone biopsy or loop excision followed by colposcopy at 6 months then annual cytology VERSUS Treatment with cone biopsy or loop excision followed by colposcopy at 6 months then triennial cytology IN Women with cervical intraepithelial neoplasia stage 2 | 5217  | 6000        | Melnikow et al., 2010 (265)       |
| Treatment with cryotherapy followed by colposcopy at 6 months then triennial cytology VERSUS Treatment with cryotherapy followed by conventional cytology at 6 and 12 months then triennially IN Women with cervical intraepithelial neoplasia stage 2                     | 221   | 250         | Melnikow et al., 2010 (265)       |
| Treatment with cryotherapy followed by colposcopy at 6 months then annual cytology VERSUS Treatment with cryotherapy followed by colposcopy at 6 months then triennial cytology IN Women with cervical                                                                     | 5246  | 6000        | Melnikow et al., 2010 (265)       |

**Appendix**  
**Cost-Utility Analysis of Cancer Prevention, Treatment, and Control: A Systematic Review**  
**Winn et al.**

|                                                                                                                                                                                                                                                                                          |       |       |                             |
|------------------------------------------------------------------------------------------------------------------------------------------------------------------------------------------------------------------------------------------------------------------------------------------|-------|-------|-----------------------------|
| intraepithelial neoplasia stage 2                                                                                                                                                                                                                                                        |       |       |                             |
| Treatment with cone biopsy or loop excision followed by colposcopy at 6 months then triennial cytology VERSUS Treatment with cone biopsy or loop excision followed by conventional cytology at 6 and 12 months then triennially IN Women with cervical intraepithelial neoplasia stage 3 | 331   | 380   | Melnikow et al., 2010 (265) |
| Treatment with cone biopsy or loop excision followed by colposcopy at 6 months then triennial cytology VERSUS Treatment with cone biopsy or loop excision followed by colposcopy at 6 months then annual cytology IN Women with cervical intraepithelial neoplasia stage 3               | 5193  | 5900  | Melnikow et al., 2010 (265) |
| Treatment with cryotherapy followed by colposcopy at 6 months then triennial cytology VERSUS Treatment with cryotherapy followed by conventional cytology at 6 and 12 months then triennially IN Women with cervical intraepithelial neoplasia stage 3                                   | 54    | 62    | Melnikow et al., 2010 (265) |
| Treatment with cryotherapy followed by colposcopy at 6 months then annual cytology VERSUS Treatment with cryotherapy followed by colposcopy at 6 months then triennial cytology IN Women with cervical intraepithelial neoplasia stage 3                                                 | 5133  | 5900  | Melnikow et al., 2010 (265) |
| Treatment with cone biopsy or loop excision, followed by colposcopy at 6 months then triennial cytology VERSUS Treatment with cone biopsy or loop excision, followed by conventional cytology at 6 and 12 months then annually IN Women with cervical intraepithelial neoplasia stage 2  | 369   | 420   | Melnikow et al., 2010 (265) |
| Lay health worker home visit for Pap smear VERSUS None IN Vietnamese-American women who have not received a Pap test in the last 3 years                                                                                                                                                 | 30015 | 33000 | Scoggins et al., 2010 (266) |
| Pap smear, every 5 years for women aged 30-69 years VERSUS No screening IN Healthy females aged 30 years                                                                                                                                                                                 | 20962 | 23000 | Chow et al., 2010 (267)     |
| Pap smear, every 3 years for women aged 30-69 years VERSUS No screening IN Healthy females aged 30 years                                                                                                                                                                                 | 22494 | 25000 | Chow et al., 2010 (267)     |
| Pap smear, annually for women aged 30-69 years VERSUS No screening IN Healthy females aged 30 years                                                                                                                                                                                      | 26590 | 29000 | Chow et al., 2010 (267)     |

**Appendix**  
**Cost-Utility Analysis of Cancer Prevention, Treatment, and Control: A Systematic Review**  
**Winn et al.**

|                                                                                                                                                                               |       |       |                         |
|-------------------------------------------------------------------------------------------------------------------------------------------------------------------------------|-------|-------|-------------------------|
| HPV DNA testing followed by Pap smear triage, every 5 years for women aged 30-69 years VERSUS No screening IN Healthy females aged 30 years                                   | 28470 | 31000 | Chow et al., 2010 (267) |
| HPV DNA testing combined with Pap smear, every 5 years for women aged 30-69 years VERSUS No screening IN Healthy females aged 30 years                                        | 32064 | 35000 | Chow et al., 2010 (267) |
| HPV DNA testing followed by Pap smear triage, every 3 years for women aged 30-69 years VERSUS No screening IN Healthy females aged 30 years                                   | 30341 | 33000 | Chow et al., 2010 (267) |
| HPV DNA testing combined with Pap smear, every 3 years for women aged 30-69 years VERSUS No screening IN Healthy females aged 30 years                                        | 35057 | 39000 | Chow et al., 2010 (267) |
| HPV DNA testing followed by Pap smear triage, annually for women aged 30-69 years VERSUS No screening IN Healthy females aged 30 years                                        | 34982 | 38000 | Chow et al., 2010 (267) |
| HPV DNA testing combined with Pap smear, annually for women aged 30-69 years VERSUS No screening IN Healthy females aged 30 years                                             | 40416 | 44000 | Chow et al., 2010 (267) |
| HPV DNA testing followed by Pap smear triage, every 5 years for women aged 30-69 years VERSUS Pap smear, annually for women aged 30-69 years IN Healthy females aged 30 years | 39604 | 44000 | Chow et al., 2010 (267) |
| HPV DNA testing combined with Pap smear, every 5 years for women aged 30-69 years VERSUS Pap smear, annually for women aged 30-69 years IN Healthy females aged 30 years      | 55835 | 61000 | Chow et al., 2010 (267) |
| HPV DNA testing followed by Pap smear triage, every 3 years for women aged 30-69 years VERSUS Pap smear, annually for women aged 30-69 years IN Healthy females aged 30 years | 41375 | 45000 | Chow et al., 2010 (267) |
| HPV DNA testing combined with Pap smear, every 3 years for women aged 30-69 years VERSUS Pap smear, annually for women aged 30-69 years IN Healthy females aged 30 years      | 58174 | 64000 | Chow et al., 2010 (267) |



**Appendix**  
**Cost-Utility Analysis of Cancer Prevention, Treatment, and Control: A Systematic Review**  
**Winn et al.**

|                                                                                                                                                                                                                       |        |             |                              |
|-----------------------------------------------------------------------------------------------------------------------------------------------------------------------------------------------------------------------|--------|-------------|------------------------------|
| HPV DNA testing followed by Pap smear triage, annually for women aged 30-69 years VERSUS Pap smear, annually for women aged 30-69 years IN Healthy females aged 30 years                                              | 55444  | 61000       | Chow et al., 2010 (267)      |
| HPV DNA testing combined with Pap smear, annually for women aged 30-69 years VERSUS Pap smear, annually for women aged 30-69 years IN Healthy females aged 30 years                                                   | 71091  | 78000       | Chow et al., 2010 (267)      |
| Pap smear, every 3 years for women aged 30-69 years VERSUS Pap smear, every 5 years for women aged 30-69 years IN Healthy females aged 30 years                                                                       | 28228  | 31000       | Chow et al., 2010 (267)      |
| Pap smear, annually for women aged 30-69 years VERSUS Pap smear, every 5 years for women aged 30-69 years IN Healthy females aged 30 years                                                                            | 1894   | 2100        | Chow et al., 2010 (267)      |
| Pap smear, every 5 years for women aged 30-69 years VERSUS HPV DNA testing followed by Pap smear triage, every 5 years for women aged 30-69 years IN Healthy females aged 30 years                                    | 42037  | 46000       | Chow et al., 2010 (267)      |
| HPV DNA testing followed by Pap smear triage, every 3 years for women aged 30-69 years VERSUS HPV DNA testing followed by Pap smear triage, every 5 years for women aged 30-69 years IN Healthy females aged 30 years | 43123  | 47000       | Chow et al., 2010 (267)      |
| HPV DNA testing followed by Pap smear triage, annually for women aged 30-69 years VERSUS HPV DNA testing followed by Pap smear triage, every 3 years for women aged 30-69 years IN Healthy females aged 30 years      | 123594 | 140000      | Chow et al., 2010 (267)      |
| HPV DNA testing followed by Pap smear triage, annually for women aged 30-69 years VERSUS HPV DNA testing combined with Pap smear, annually for women aged 30-69 years IN Healthy females aged 30 years                | 377651 | 420000      | Chow et al., 2010 (267)      |
| HPV 16/18 vaccine plus screening VERSUS Screening only IN French adolescent females aged 12 years                                                                                                                     | 13308  | 15000       | Demarteau et al., 2010 (268) |
| Bivalent human papillomavirus (HPV) vaccination (40% coverage) IN Women aged over 18 years with cervical cancer and pre-invasive diseases in Malaysia                                                                 | 1173   | Cost-Saving | Ezat et al., 2010 (269)      |

**Appendix**  
**Cost-Utility Analysis of Cancer Prevention, Treatment, and Control: A Systematic Review**  
**Winn et al.**

|                                                                                                                                                                                                                                                 |        |                                   |                            |
|-------------------------------------------------------------------------------------------------------------------------------------------------------------------------------------------------------------------------------------------------|--------|-----------------------------------|----------------------------|
| Quadrivalent human papillomavirus (HPV) vaccination VERSUS Pap smear (40% coverage) IN Women aged over 18 years with cervical cancer and pre-invasive diseases in Malaysia                                                                      | 4804   | 5600                              | Ezat et al., 2010 (269)    |
| Bivalent human papillomavirus (HPV) vaccination + pap smear VERSUS Pap smear (40% coverage) IN Women aged over 18 years with cervical cancer and pre-invasive diseases in Malaysia                                                              | 325809 | 380000                            | Ezat et al., 2010 (269)    |
| Quadrivalent human papillomavirus (HPV) vaccination + pap smear VERSUS Pap smear (40% coverage) IN Women aged over 18 years with cervical cancer and pre-invasive diseases in Malaysia                                                          | 2142   | 2500                              | Ezat et al., 2010 (269)    |
| Quadrivalent human papillomavirus (HPV) vaccination + pap smear VERSUS Bivalent human papillomavirus (HPV) vaccination + pap smear IN Women aged over 18 years with cervical cancer and pre-invasive diseases in Malaysia                       | 0      | Cost-Saving                       | Ezat et al., 2010 (269)    |
| Pap smear (40% coverage) VERSUS None IN Women aged over 18 years with cervical cancer and pre-invasive diseases in Malaysia                                                                                                                     | 331    | 390                               | Ezat et al., 2010 (269)    |
| Pap test followed by human papillomavirus (HPV) DNA triage every five years VERSUS Current screening policy (Pap test every three years) IN Women without HPV infection and are eligible for vaccination and/or screening in Italy              | 5647   | 6600                              | Accetta et al., 2010 (270) |
| Human papillomavirus (HPV) DNA test and Pap test triage every five years and HPV vaccine VERSUS Current screening policy (Pap test every three years) IN Women without HPV infection and are eligible for vaccination and/or screening in Italy | 30089  | 35000                             | Accetta et al., 2010 (270) |
| Human papillomavirus (HPV) vaccine at age 11 years VERSUS Current screening policy (Pap test every three years) IN Women without HPV infection and are eligible for vaccination and/or screening in Italy                                       |        | Increases Costs, Decreases Health | Accetta et al., 2010 (270) |
| Human papillomavirus (HPV) DNA test every 3 years VERSUS Current screening policy (Pap test every three years) IN Women without HPV infection and are eligible for vaccination and/or screening in Italy                                        | 322223 | 380000                            | Accetta et al., 2010 (270) |

**Appendix**  
**Cost-Utility Analysis of Cancer Prevention, Treatment, and Control: A Systematic Review**  
**Winn et al.**

|                                                                                                                                                                                                                                                        |        |                                      |                                     |
|--------------------------------------------------------------------------------------------------------------------------------------------------------------------------------------------------------------------------------------------------------|--------|--------------------------------------|-------------------------------------|
| Human papillomavirus (HPV) DNA test and Pap test triage every three years including HPV vaccine VERSUS Current screening policy (Pap test every three years) IN Women without HPV infection and are eligible for vaccination and/or screening in Italy | 143539 | 170000                               | Accetta et al., 2010 (270)          |
| Human papillomavirus (HPV) DNA test and Pap test triage every five years VERSUS Current screening policy (Pap test every three years) IN Women without HPV infection and are eligible for vaccination and/or screening in Italy                        | 7227   | 8500                                 | Accetta et al., 2010 (270)          |
| Quadrivalent human papillomavirus vaccine and cervical cancer screening VERSUS Screening only IN 12 year old females in Singapore                                                                                                                      | 7156   | 7900                                 | Lee et al., 2011 (271)              |
| Bivalent human papillomavirus vaccine VERSUS Quadrivalent human papillomavirus vaccine IN 12 year old females in Singapore                                                                                                                             | -72265 | Increases Costs,<br>Decreases Health | Lee et al., 2011 (271)              |
| Bivalent human papillomavirus vaccine and cervical cancer screening VERSUS Screening only IN 12 year old females in Singapore                                                                                                                          | 8198   | 9000                                 | Lee et al., 2011 (271)              |
| Human papillomavirus (HPV) vaccination at age 25 years VERSUS Visual inspection with acetic acid (VIA) every 5 years (age 30-45 years) + Pap smear every 5 years (age 50-60 years) IN Women aged 15 years and over in Thailand                         | 9863   | 11000                                | Praditsitthikorn et al., 2011 (272) |
| Human papillomavirus (HPV) vaccination at age 24 years VERSUS Human papillomavirus (HPV) vaccination at age 25 years IN Women aged 15 years and over in Thailand                                                                                       | 3542   | 4000                                 | Praditsitthikorn et al., 2011 (272) |
| Human papillomavirus (HPV) vaccination at age 23 years VERSUS Human papillomavirus (HPV) vaccination at age 24 years IN Women aged 15 years and over in Thailand                                                                                       | 1367   | 1600                                 | Praditsitthikorn et al., 2011 (272) |
| Human papillomavirus (HPV) vaccination at age 22 years VERSUS Human papillomavirus (HPV) vaccination at age 22 years IN Women aged 15 years and over in Thailand                                                                                       | 2573   | 2900                                 | Praditsitthikorn et al., 2011 (272) |
| Human papillomavirus (HPV) vaccination at age 21 years VERSUS Human papillomavirus (HPV) vaccination at age 22 years IN Women aged 15 years and over in Thailand                                                                                       | 2259   | 2600                                 | Praditsitthikorn et al., 2011 (272) |
| Human papillomavirus (HPV) vaccination at age 20 years VERSUS Human papillomavirus (HPV) vaccination at age 21 years IN Women aged 15 years and over in Thailand                                                                                       | 1441   | 1600                                 | Praditsitthikorn et al., 2011 (272) |

**Appendix**  
**Cost-Utility Analysis of Cancer Prevention, Treatment, and Control: A Systematic Review**  
**Winn et al.**

|                                                                                                                                                                                                                                                                                         |         |                                      |                                     |
|-----------------------------------------------------------------------------------------------------------------------------------------------------------------------------------------------------------------------------------------------------------------------------------------|---------|--------------------------------------|-------------------------------------|
| Human papillomavirus (HPV) vaccination at age 19 years VERSUS Human papillomavirus (HPV) vaccination at age 20 years IN Women aged 15 years and over in Thailand                                                                                                                        | 908     | 1000                                 | Praditsitthikorn et al., 2011 (272) |
| Human papillomavirus (HPV) vaccination at age 18 years VERSUS Human papillomavirus (HPV) vaccination at age 19 years IN Women aged 15 years and over in Thailand                                                                                                                        | 1403    | 1600                                 | Praditsitthikorn et al., 2011 (272) |
| Human papillomavirus (HPV) vaccination at age 17 years VERSUS Human papillomavirus (HPV) vaccination at age 18 years IN Women aged 15 years and over in Thailand                                                                                                                        | 2498    | 2900                                 | Praditsitthikorn et al., 2011 (272) |
| Human papillomavirus (HPV) vaccination at age 16 years VERSUS Human papillomavirus (HPV) vaccination at age 17 years IN Women aged 15 years and over in Thailand                                                                                                                        | 3474    | 4000                                 | Praditsitthikorn et al., 2011 (272) |
| Human papillomavirus (HPV) vaccination at age 15 years + Visual inspection with acetic acid (VIA) every 5 years (age 30-45 years) + Pap smear every 5 years (age 50-60 years) VERSUS Human papillomavirus (HPV) vaccination at age 16 years IN Women aged 15 years and over in Thailand | 676     | 770                                  | Praditsitthikorn et al., 2011 (272) |
| 4 times human papillomavirus (HPV) DNA screening between 30-60 years along with vaccination VERSUS 4 times cytological screening IN Women aged 10 years and over                                                                                                                        | 9347    | 10000                                | Coup? et al., 2012 (273)            |
| 4 times cytological screening VERSUS Vaccination IN Women aged 10 years and over                                                                                                                                                                                                        | 3821    | 4200                                 | Coup? et al., 2012 (273)            |
| 6 times cytological screening between 30-60 years VERSUS 4 times human papillomavirus (HPV) DNA testing between 30-60 years IN Women aged 10 years and over                                                                                                                             | -20903  | Increases Costs,<br>Decreases Health | Coup? et al., 2012 (273)            |
| 4 times human papillomavirus (HPV) DNA screening along with 5-valent vaccination VERSUS Vaccination IN Women aged 10 years and over                                                                                                                                                     | 38345   | 42000                                | Coup? et al., 2012 (273)            |
| 7 times cytological screening between 30-60 years VERSUS 4 times human papillomavirus (HPV) DNA testing between 30-60 years IN Women aged 10 years and over                                                                                                                             | -222968 | Increases Costs,<br>Decreases Health | Coup? et al., 2012 (273)            |

**Appendix**  
**Cost-Utility Analysis of Cancer Prevention, Treatment, and Control: A Systematic Review**  
**Winn et al.**

|                                                                                                                                                                                                                                                   |       |                                      |                           |
|---------------------------------------------------------------------------------------------------------------------------------------------------------------------------------------------------------------------------------------------------|-------|--------------------------------------|---------------------------|
| 5 times human papillomavirus (HPV) DNA testing between 30-60 years VERSUS 4 times human papillomavirus (HPV) DNA testing between 30-60 years IN Women aged 10 years and over                                                                      | 32006 | 35000                                | Coup? et al., 2012 (273)  |
| 6 times human papillomavirus (HPV) DNA testing between 30-60 years VERSUS 5 times human papillomavirus (HPV) DNA testing between 30-60 years IN Women aged 10 years and over                                                                      | 37360 | 41000                                | Coup? et al., 2012 (273)  |
| 7 times human papillomavirus (HPV) DNA testing between 30-60 years VERSUS 6 times human papillomavirus (HPV) DNA testing between 30-60 years IN Women aged 10 years and over                                                                      |       | Increases Costs,<br>Decreases Health | Coup? et al., 2012 (273)  |
| 3 times human papillomavirus (HPV) DNA screening along with broad spectrum vaccination (5-13-valent vaccination) VERSUS Vaccination IN Women aged 10 years and over                                                                               |       | Increases Costs,<br>Decreases Health | Coup? et al., 2012 (273)  |
| 2 times human papillomavirus (HPV) DNA screening along with 5-valent vaccination VERSUS Vaccination IN Women aged 10 years and over                                                                                                               | 21877 | 24000                                | Coup? et al., 2012 (273)  |
| Pap smear VERSUS None IN Women aged 25-64 years in Hungary                                                                                                                                                                                        | 18990 | 21000                                | Vok? et al., 2012 (274)   |
| Intensified current screening- current practice of screening by cytology and colposcopy in outpatient services along with active communication campaign to reach and motivate women VERSUS None IN Women aged 25-64 years in Hungary              | 33100 | 36000                                | Vok? et al., 2012 (274)   |
| Primary screening for human papillomavirus (HPV) using automated molecular amplification or hybridisation techniques in women over age 30 years VERSUS Primary cytology screening IN Unvaccinated women born between 1939 and 1992 in Netherlands |       | Increases Costs,<br>Decreases Health | de Kok et al., 2012 (275) |

**Appendix**  
**Cost-Utility Analysis of Cancer Prevention, Treatment, and Control: A Systematic Review**  
**Winn et al.**

|                                                                                                                                                                                                                                                                                         |        |        |                                   |
|-----------------------------------------------------------------------------------------------------------------------------------------------------------------------------------------------------------------------------------------------------------------------------------------|--------|--------|-----------------------------------|
| Cervical cancer screening with manually screened ThinPrep liquid-based cytology (LBC) every 5 years during the age of 30-60 years VERSUS Cervical cancer screening with conventional papanicolaou (CP) IN Dutch women at risk for cervical cancer                                       | 81308  | 90000  | de Bekker-Grob et al., 2012 (276) |
| Cervical cancer screening with manually screened ThinPrep liquid-based cytology (LBC) every 3 years during the age of 25-65 years VERSUS Cervical cancer screening with conventional papanicolaou (CP) IN Women at risk for cervical cancer in Netherlands                              | 233120 | 260000 | de Bekker-Grob et al., 2012 (276) |
| Gemcitabine with cisplatin chemoradiation followed by 2 cycles of adjuvant gemcitabine and cisplatin VERSUS Standard cisplatin chemoradiation IN Women with locally advanced cervix cancer (stages IIB to IVA carcinoma of the cervix)                                                  | 33080  | 35000  | Phippen et al., 2012 (277)        |
| Cisplatin (50 mg per sq meter for 21 days) VERSUS Cisplatin (50 mg per sq meter) and paclitaxel (135 mg per sq meter) for 21 days IN Women with advanced, recurrent or persistent squamous cell carcinoma                                                                               | 13654  | 14000  | Geisler et al., 2012 (278)        |
| Cisplatin (50 mg per sq meter for 21 days) VERSUS Cisplatin (50 mg per sq meter for 21 days) and topotecan (0.75 mg per sq meter for 21 days) IN Women with advanced, recurrent or persistent squamous cell carcinoma                                                                   | 152327 | 160000 | Geisler et al., 2012 (278)        |
| Intensity-modulated radiation therapy (IMRT) VERSUS Four field radiation therapy (BOX-RT) IN Specific disease- Locally advanced cervical cancer; Age- 41 to 64 years, >=65 years, Adult; Gender- Female; Country- United States.                                                        | 182777 | 200000 | Lesnock et al., 2013 (279)        |
| Single-agent chemotherapy with home hospice for all VERSUS Home hospice for all IN Specific disease- Cervical cancer; Age- Adult; Gender- Female; Country- United States.                                                                                                               | 44392  | 46000  | Phippen et al., 2013 (280)        |
| Standard doublet chemotherapy for all VERSUS Selective chemotherapy (home hospice with no chemotherapy for poorest prognosis patients with remainder receiving standard doublet chemotherapy) IN Specific disease- Cervical cancer; Age- Adult; Gender- Female; Country- United States. | 275630 | 280000 | Phippen et al., 2013 (280)        |

**Appendix**  
**Cost-Utility Analysis of Cancer Prevention, Treatment, and Control: A Systematic Review**  
**Winn et al.**

|                                                                                                                                                                                                                                                                                                      |       |             |                              |
|------------------------------------------------------------------------------------------------------------------------------------------------------------------------------------------------------------------------------------------------------------------------------------------------------|-------|-------------|------------------------------|
| Selective chemotherapy (home hospice with no chemotherapy for poorest prognosis patients with remainder receiving standard doublet chemotherapy VERSUS Single-agent chemotherapy with home hospice for all IN Specific disease- Cervical cancer; Age- Adult; Gender- Female; Country- United States. | 78404 | 81000       | Phippen et al., 2013 (280)   |
| human papillomavirus (HPV) vaccination VERSUS screening only (every 3 years from age 25 to 65 years for 59% of the population) IN Healthy; Age-; Gender- Female; Country- belgium.                                                                                                                   | 12137 | 13000       | Demarteau et al., 2013 (281) |
| human papillomavirus (HPV) vaccination VERSUS screening only (every 3 years from age 25 to 65 years for 59% of the population) IN Healthy; Age-; Gender- Female; Country- belgium.                                                                                                                   | 15388 | 17000       | Demarteau et al., 2013 (281) |
| HPV vaccination, 12 & 15 & 18& 21 years old girls VERSUS Placebo IN Healthy; Age-; Gender- Female; Country- Italy.                                                                                                                                                                                   | 22112 | 23000       | Favato et al., 2013 (282)    |
| HPV vaccination, 12 & 15 years old girls VERSUS Placebo IN Healthy; Age-; Gender- Female; Country- Italy.                                                                                                                                                                                            | 16717 | 18000       | Favato et al., 2013 (282)    |
| HPV vaccination, 12 & 15 & 18 years old girls VERSUS Placebo IN Healthy; Age-; Gender- Female; Country- Italy.                                                                                                                                                                                       | 18413 | 19000       | Favato et al., 2013 (282)    |
| HPV vaccination, 12 years old girls VERSUS Placebo IN Healthy; Age-; Gender- Female; Country- Italy.                                                                                                                                                                                                 | 15245 | 16000       | Favato et al., 2013 (282)    |
| Routine vaccination VERSUS None IN Healthy; Age- Unknown; Gender- Female; Country- estonia.                                                                                                                                                                                                          | 6803  | 7200        | Uusk?la et al., 2013 (283)   |
| Quadrivalent human papillomavirus vaccines VERSUS Placebo IN Healthy; Age- 0 to 18 years; Gender- Female; Country- Canada.                                                                                                                                                                           | 15084 | 16000       | Brisson et al., 2013 (284)   |
| Bivalent human papillomavirus vaccines VERSUS Placebo IN Healthy; Age- 0 to 18 years; Gender- Female; Country- Canada.                                                                                                                                                                               | 19605 | 21000       | Brisson et al., 2013 (284)   |
| Human papillomavirus (HPV) vaccine VERSUS None IN Healthy; Age- 0 to 18 years; Gender- Female; Country- Brazil.                                                                                                                                                                                      | -125  | Cost-Saving | Fonseca et al., 2013 (285)   |
| Human papillomavirus (HPV) vaccine + 3 screenings VERSUS only screening IN Healthy; Age- 0 to 18 years; Gender- Female; Country- Brazil.                                                                                                                                                             | 825   | 850         | Fonseca et al., 2013 (285)   |

**Appendix**  
**Cost-Utility Analysis of Cancer Prevention, Treatment, and Control: A Systematic Review**  
**Winn et al.**

|                                                                                                                                           |      |      |                            |
|-------------------------------------------------------------------------------------------------------------------------------------------|------|------|----------------------------|
| Human papillomavirus (HPV) vaccine + 10 screenings VERSUS only screening IN Healthy; Age- 0 to 18 years; Gender- Female; Country- Brazil. | 1275 | 1300 | Fonseca et al., 2013 (285) |
|-------------------------------------------------------------------------------------------------------------------------------------------|------|------|----------------------------|

## Colorectal Cancer

| Description                                                                                                                                                                                                                            | Original US\$/QALY | 2014US\$/QALY                     | Reference                 |
|----------------------------------------------------------------------------------------------------------------------------------------------------------------------------------------------------------------------------------------|--------------------|-----------------------------------|---------------------------|
| Monitoring using clinical symptoms and carcinoembryonic antigen VERSUS Monitoring for cancer recurrence using clinical symptoms only IN Patients undergoing follow-up evaluation after colon cancer resection                          | -149873            | Increases Costs, Decreases Health | Kievit et al., 1990 (286) |
| Surgery plus adjuvant chemotherapy VERSUS Surgery alone IN Patients with Dukes' stage C colonic carcinoma                                                                                                                              | 13662              | 25000                             | Smith et al., 1993 (287)  |
| Intensive follow-up VERSUS No follow-up IN Colorectal cancer patients previously treated by surgery                                                                                                                                    | -34783             | Increases Costs, Decreases Health | Kievit et al., 1995 (288) |
| Selective follow-up VERSUS No follow-up IN Colorectal cancer patients previously treated by surgery                                                                                                                                    | -20884             | Increases Costs, Decreases Health | Kievit et al., 1995 (288) |
| Adjuvant chemotherapy following surgery, 5% gain in life expectancy VERSUS Surgery alone IN Colorectal cancer patients Duke's B or C, no concomittant malignancy, ulcerative colitis, Crohn's disease, renal, heart or liver failure   | 26518              | 41000                             | Norum et al., 1997 (289)  |
| Adjuvant chemotherapy following surgery , 10% gain in life expectancy VERSUS Surgery alone IN Colorectal cancer patients Duke's B or C, no concomittant malignancy, ulcerative colitis, Crohn's disease, renal, heart or liver failure | 10607              | 16000                             | Norum et al., 1997 (289)  |



**Appendix**  
**Cost-Utility Analysis of Cancer Prevention, Treatment, and Control: A Systematic Review**  
**Winn et al.**

|                                                                                                                                                                                                                                                |       |             |                                     |
|------------------------------------------------------------------------------------------------------------------------------------------------------------------------------------------------------------------------------------------------|-------|-------------|-------------------------------------|
| Adjuvant chemotherapy following surgery, 15% gain in life expectancy<br>VERSUS Surgery alone IN Colorectal cancer patients Duke's B or C, no<br>concomittant malignancy, ulcerative colitis, Crohn's disease, renal, heart<br>or liver failure | 7577  | 12000       | Norum et al.,<br>1997 (289)         |
| Follow-up program, including carcinoembryonic antigen monitoring<br>VERSUS No follow-up IN Norwegian colorectal cancer patients                                                                                                                | 17910 | 27000       | Norum et al.,<br>1997 (290)         |
| Adjuvant chemotherapy using fluorouracil and levamisole VERSUS No<br>adjuvant treatment IN Patients with stage III resected colon cancer                                                                                                       | 1501  | 2200        | Bonistalli et<br>al., 1998<br>(291) |
| Fecal occult blood screening protocol for colorectal cancer VERSUS No<br>screening IN 50 year old males                                                                                                                                        | 3195  | 4800        | Whynes et al.,<br>1998 (292)        |
| Fecal occult blood screening protocol for colorectal cancer VERSUS No<br>screening IN 50 year old females                                                                                                                                      | 2140  | 3200        | Whynes et al.,<br>1998 (292)        |
| Quality management system for a colorectal cancer screening program<br>VERSUS Colorectal cancer screening program, with no quality<br>management program IN 50-74 year-old population undergoing<br>colorectal cancer screening                | 10717 | 15000       | Robert et al.,<br>2000 (293)        |
| Onetime colonoscopic screening for colorectal cancer at 60-64 yrs old<br>VERSUS No screening IN Men over 40 years old                                                                                                                          | -2422 | Cost-Saving | Ness et al.,<br>2000 (294)          |
| Onetime colonoscopic screening for colorectal cancer at 55-59 yrs old<br>VERSUS Onetime colonoscopic screening for colorectal cancer at 60-64<br>yrs old IN Men over 40 years old                                                              | -538  | Cost-Saving | Ness et al.,<br>2000 (294)          |
| Onetime colonoscopic screening for colorectal cancer at 50-54 yrs old<br>VERSUS Onetime colonoscopic screening for colorectal cancer at 55-59<br>yrs old IN Men over 40 years old                                                              | 3625  | 5300        | Ness et al.,<br>2000 (294)          |
| Onetime colonoscopic screening for colorectal cancer at 60-64 yrs old<br>VERSUS No screening IN Women over 40 years old                                                                                                                        | -2000 | Cost-Saving | Ness et al.,<br>2000 (294)          |
| Onetime colonoscopic screening for colorectal cancer at 55-59 yrs old<br>VERSUS Onetime colonoscopic screening for colorectal cancer at 60-64<br>yrs old IN Women over 40 years old                                                            | 636   | 920         | Ness et al.,<br>2000 (294)          |
| Onetime colonoscopic screening for colorectal cancer at 50-54 yrs old<br>VERSUS Onetime colonoscopic screening for colorectal cancer at 55-59<br>yrs old IN Women over 40 years old                                                            | 8800  | 13000       | Ness et al.,<br>2000 (294)          |

**Appendix**  
**Cost-Utility Analysis of Cancer Prevention, Treatment, and Control: A Systematic Review**  
**Winn et al.**

|                                                                                                                                                                                                                                                                                                                       |         |       |                                            |                                        |
|-----------------------------------------------------------------------------------------------------------------------------------------------------------------------------------------------------------------------------------------------------------------------------------------------------------------------|---------|-------|--------------------------------------------|----------------------------------------|
| Onetime colonoscopic screening for colorectal cancer at 45-49 yrs old VERSUS Onetime colonoscopic screening for colorectal cancer at 50-54 yrs old IN Women over 40 years old                                                                                                                                         |         |       | Increases<br>Costs,<br>Decreases<br>Health | Ness et al.,<br>2000 (294)             |
| Diagnostic or palliative surgery VERSUS Nonoperative therapy IN Patients with locally recurrent rectal carcinoma undergoing surgical evaluation                                                                                                                                                                       | -131820 |       | Increases<br>Costs,<br>Decreases<br>Health | Miller et al.,<br>2000 (295)           |
| Surgical resection VERSUS Nonoperative therapy IN Patients with locally recurrent rectal carcinoma undergoing surgical evaluation                                                                                                                                                                                     | 56697   | 82000 |                                            | Miller et al.,<br>2000 (295)           |
| 6 month follow-up interval for testing and treatment, 1 hepatic resection, and resection of no more than 6 metastases VERSUS No-test/no-treat IN Male patients who have previously undergone resection of a primary colorectal carcinoma (CRC) and are known to have developed metachronous liver metastases - age 65 | 17600   | 26000 |                                            | Gazelle et al.,<br>2003 (296)          |
| Preoperative radiotherapy plus total mesorectal excision (TME) VERSUS TME without preoperative radiotherapy IN Rectal cancer patients                                                                                                                                                                                 | 25100   | 33000 |                                            | van den Brink<br>et al., 2004<br>(297) |
| Preoperative radiotherapy plus total mesorectal excision (TME) VERSUS TME without preoperative radiotherapy IN Rectal cancer patients with microscopically negative metastases at surgery                                                                                                                             | 29700   | 39000 |                                            | van den Brink<br>et al., 2004<br>(297) |
| Preoperative radiotherapy plus total mesorectal excision (TME) VERSUS TME without preoperative radiotherapy IN Rectal cancer patients with microscopically positive or incomplete local resection                                                                                                                     | 3600    | 4700  |                                            | van den Brink<br>et al., 2004<br>(297) |
| Preoperative radiotherapy plus total mesorectal excision (TME) VERSUS TME without preoperative radiotherapy IN Rectal cancer patients with distant metastases at surgery                                                                                                                                              | -26800  |       | Increases<br>Costs,<br>Decreases<br>Health | van den Brink<br>et al., 2004<br>(297) |
| Standard follow up VERSUS Simplified follow-up IN Patient with invasive adenocarcinomas recorded in the final data set of colorectal cancer, post surgery. (all populations) - age 75+                                                                                                                                | 3529    | 5100  |                                            | Borie et al.,<br>2004 (298)            |

**Appendix**  
**Cost-Utility Analysis of Cancer Prevention, Treatment, and Control: A Systematic Review**  
**Winn et al.**

|                                                                                                                                                                                                                                                          |         |                                            |                               |
|----------------------------------------------------------------------------------------------------------------------------------------------------------------------------------------------------------------------------------------------------------|---------|--------------------------------------------|-------------------------------|
| Standard follow up VERSUS Simplified follow-up IN Patient with invasive adenocarcinomas recorded in the final data set of colorectal cancer (Duke's grade A) - age 75+                                                                                   | -9044   | Increases<br>Costs,<br>Decreases<br>Health | Borie et al.,<br>2004 (298)   |
| Standard follow up VERSUS Simplified follow-up IN Patient with invasive adenocarcinomas recorded in the final data set of colorectal cancer. (Duke's grade B) - age 75+                                                                                  | 9730    | 14000                                      | Borie et al.,<br>2004 (298)   |
| Standard follow up VERSUS Simplified follow-up IN Patient with invasive adenocarcinomas recorded in the final data set of colorectal cancer. (Duke's grade C) - age 75+                                                                                  | 921     | 1300                                       | Borie et al.,<br>2004 (298)   |
| Asprin for colorectal carcinoma chemoprevention VERSUS Celecoxib IN Healthy men - age 50                                                                                                                                                                 | -774067 | Cost-Saving                                | Hur et al.,<br>2004 (299)     |
| Standard care VERSUS Simplified follow up IN Patients who underwent curative resection of colorectal cancer and now in follow up (all stages)                                                                                                            | 3529    | 5100                                       | Borie et al.,<br>2004 (300)   |
| Irinotecan once every 3 weeks (350 mg/m <sup>2</sup> or 300 mg/m <sup>2</sup> ) VERSUS Irinotecan weekly (125 mg/m <sup>2</sup> once a week for four weeks) followed by a two week break IN Patients with advanced colorectal carcinoma - age 70 or over | 78627   | Cost-Saving                                | Earle et al.,<br>2004 (301)   |
| Radiofrequency ablation (RF) for up to 5 metastases with 12 month follow up VERSUS RF for up to 3 metastases with 12 month follow up IN Patients with metachronous liver metastases from colorectal carcinoma                                            | 519     | 750                                        | Gazelle et al.,<br>2004 (302) |
| Radiofrequency ablation (RF) for up to 6 metastases with 12 month follow up VERSUS RF for up to 5 metastases with 12 month follow up IN Patients with metachronous liver metastases from colorectal carcinoma                                            | 1300    | 1900                                       | Gazelle et al.,<br>2004 (302) |
| Hepatic resection for up to 6 metastases with 12 month follow up VERSUS Radiofrequency ablation (RF) for up to 6 metastases with 12 month follow up IN Patients with metachronous liver metastases from colorectal carcinoma                             | 16900   | 25000                                      | Gazelle et al.,<br>2004 (302) |
| Hepatic resection for up to 6 metastases with 4 month follow up VERSUS Hepatic resection for up to 6 metastases with 12 month follow                                                                                                                     | 31200   | 45000                                      | Gazelle et al.,<br>2004 (302) |

**Appendix**  
**Cost-Utility Analysis of Cancer Prevention, Treatment, and Control: A Systematic Review**  
**Winn et al.**

|                                                                                                                                                                                                                                                                    |        |             |                                 |
|--------------------------------------------------------------------------------------------------------------------------------------------------------------------------------------------------------------------------------------------------------------------|--------|-------------|---------------------------------|
| up IN Patients with metachronous liver metastases from colorectal carcinoma                                                                                                                                                                                        |        |             |                                 |
| Oncovax vaccination VERSUS Surgery IN Patients with stage II (Dukes B2 or B3) colon cancer                                                                                                                                                                         | 22462  | 29000       | Uyl-de Groot et al., 2005 (303) |
| FOLFOX- Oxaliplatin and infusional fluorouracil (FU) with leucovorin (LV) (FU/LV) VERSUS IFL- Irinotecan plus infusional fluorouracil (FU) with leucovorin (LV) (FU/LV) IN U.S. patients with metastatic colorectal carcinoma eligible for first-line chemotherapy | 111890 | 140000      | Hillner et al., 2005 (304)      |
| Adjuvant oral capecitabine VERSUS Intravenous 5-flourouracil/leucovorin IN Patients with Dukes' C (stage III) colon cancer: healthcare perspective                                                                                                                 | -8866  | Cost-Saving | Cassidy et al., 2006 (305)      |
| Adjuvant oral capecitabine VERSUS Intravenous 5-flourouracil/leucovorin IN Patients with Dukes' C (stage III) colon cancer: societal perspective                                                                                                                   | -12065 | Cost-Saving | Cassidy et al., 2006 (305)      |
| VERSUS IN Patients with completely resected stage III colon cancer in England and Wales - mean age 60                                                                                                                                                              | 5444   | 6800        | Eggington et al., 2006 (306)    |
| VERSUS IN Patients with completely resected stage III colon cancer in England and Wales - mean age 60                                                                                                                                                              | -6210  | Cost-Saving | Eggington et al., 2006 (306)    |
| VERSUS IN Individuals aged 60-69 without polyps or cancer through to the development of adenomatous polyps and malignant carcinoma and subsequent death in the general population of England                                                                       | 4305   | 5200        | Tappenden et al., 2007 (307)    |
| VERSUS IN Individuals aged 55 without polyps or cancer through to the development of adenomatous polyps and malignant carcinoma and subsequent death in the general population of England                                                                          | -1940  | Cost-Saving | Tappenden et al., 2007 (307)    |

**Appendix**  
**Cost-Utility Analysis of Cancer Prevention, Treatment, and Control: A Systematic Review**  
**Winn et al.**

|                                                                                                                                                                                                     |        |             |                              |
|-----------------------------------------------------------------------------------------------------------------------------------------------------------------------------------------------------|--------|-------------|------------------------------|
| VERSUS IN Individuals aged 60 without polyps or cancer through to the development of adenomatous polyps and malignant carcinoma and subsequent death in the general population of England           | -2348  | Cost-Saving | Tappenden et al., 2007 (307) |
| VERSUS IN Individuals aged 61-70 without polyps or cancer through to the development of adenomatous polyps and malignant carcinoma and subsequent death in the general population of England        | -124   | Cost-Saving | Tappenden et al., 2007 (307) |
| VERSUS IN Individuals aged 50-69 without polyps or cancer through to the development of adenomatous polyps and malignant carcinoma and subsequent death in the general population of England        | 5369   | 6500        | Tappenden et al., 2007 (307) |
| Cetuximab plus irinotecan VERSUS Active/best supportive care (ASC/BSC) IN Patients with metastatic (late stage) colorectal cancer who have failed previous chemotherapy treatment                   | 105595 | 130000      | Starling et al., 2007 (308)  |
| Oxaliplatin/5-fluorouracil/leucovorin (FU/LV) (FOLFOX4) as adjuvant treatment VERSUS 5-FU/LV alone IN Patients with early colon cancer (TNM stage II and III)                                       | 22804  | 28000       | Aballéa et al., 2007 (309)   |
| Treatment with Oxaliplatin in combination with infusional 5-FU/FA VERSUS Infusional 5-FU/FA IN British stage III Colon Cancer patients                                                              | 7855   | 10000       | Aballéa et al., 2007 (310)   |
| Genetic screening of children of MUYTH associated polyposis with population screening using fecal occult blood testing VERSUS No screening IN Children of MUYTH associated polyposis (MAP) patients | 32035  | 38000       | Nielsen et al., 2007 (311)   |
| Genetic screening of children of MUYTH associated polyposis VERSUS No screening IN Children of MUYTH associated polyposis (MAP) patients                                                            | 31407  | 37000       | Nielsen et al., 2007 (311)   |

**Appendix**  
**Cost-Utility Analysis of Cancer Prevention, Treatment, and Control: A Systematic Review**  
**Winn et al.**

|                                                                                                                                                                                                                                                                                                                                              |        |                                   |                                 |
|----------------------------------------------------------------------------------------------------------------------------------------------------------------------------------------------------------------------------------------------------------------------------------------------------------------------------------------------|--------|-----------------------------------|---------------------------------|
| Genetic screening of children of MUYTH associated polyposis with heterozygote MUYTH index patient VERSUS No screening IN Children of MUYTH associated polyposis (MAP) patients                                                                                                                                                               | 64699  | 76000                             | Nielsen et al., 2007 (311)      |
| Laparoscopic-assisted colectomy VERSUS Open colectomy IN Patients with colon cancer                                                                                                                                                                                                                                                          | 46759  | 59000                             | Hayes et al., 2007 (312)        |
| Colonic stenting as a bridge to definitive surgery VERSUS Emergency surgery IN 70 year old patients with complete emergent malignant left colonic obstruction secondary to a left-sided colon cancer, worse physiological status secondary to large-bowel obstruction (LBO) and baseline American Society of Anesthesiology (ASA) score of 3 | -4333  | Cost-Saving                       | Govindarajan et al., 2007 (313) |
| Colonic stenting as a bridge to definitive surgery VERSUS Emergency surgery IN 70 year old patients with complete emergent malignant left colonic obstruction secondary to a left-sided colon cancer, minimally impaired by large-bowel obstruction (LBO) and no elevated and American Society of Anesthesiology (ASA) score                 | -41848 | Cost-Saving                       | Govindarajan et al., 2007 (313) |
| First line bevacizumab in combination with irrotectan and 5FU/LV VERSUS Irrotectan and 5FU/LV and placebo IN Patients with untreated metastatic colorectal cancer in England or Wales                                                                                                                                                        | 115217 | 140000                            | Tappenden et al., 2007 (314)    |
| First line bevacizumab in combination with irrotectan and 5-FU/LV VERSUS 5-FU/LV alone IN Patients with untreated metastatic colorectal cancer in England or Wales                                                                                                                                                                           | 162103 | 200000                            | Tappenden et al., 2007 (314)    |
| Laparoscopic surgery VERSUS Open surgery IN Colorectal cancer patients                                                                                                                                                                                                                                                                       |        | Increases Costs, Decreases Health | de Verteuil et al., 2007 (315)  |

**Appendix**  
**Cost-Utility Analysis of Cancer Prevention, Treatment, and Control: A Systematic Review**  
**Winn et al.**

|                                                                                                                                                                                                                                                                                                                                                                                                                                                                                                                    |          |             |                                |
|--------------------------------------------------------------------------------------------------------------------------------------------------------------------------------------------------------------------------------------------------------------------------------------------------------------------------------------------------------------------------------------------------------------------------------------------------------------------------------------------------------------------|----------|-------------|--------------------------------|
| Diagnostic laparoscopy to determine if liver metastases resectable; laparotomy if liver metastases determined resectable VERSUS Laparotomy IN Colorectal cancer patients with hepatic metastases deemed resectable on pre-operative imaging                                                                                                                                                                                                                                                                        | -25000   | Cost-Saving | Karuna et al., 2008 (316)      |
| Oral capecitabine (8 cycles, 1250 mg/m <sup>2</sup> twice daily) VERSUS Rapid-infusion intravenous (IV) leucovorin (LV) (6 cycles, 20 mg/m <sup>2</sup> ) followed immediately by an IV bolus of fluorouracil (FU) (425 mg/m <sup>2</sup> ) IN Patients with resected, histologically confirmed Dukes' C colon carcinoma in Italy                                                                                                                                                                                  | -427     | Cost-Saving | Di Costanzo et al., 2008 (317) |
| Oral uracil-tegafur adjuvant chemotherapy, 400 mg/m <sup>2</sup> a day for 1 year VERSUS Surgery only (total mesorectal excision) IN Japanese patients with stage III colorectal cancer, 5.6 years of observation                                                                                                                                                                                                                                                                                                  | -5014    | Cost-Saving | Hisashige et al., 2008 (318)   |
| Oral uracil-tegafur adjuvant chemotherapy, 400 mg/m <sup>2</sup> a day for 1 year VERSUS Surgery only (total mesorectal excision) IN Japanese patients with stage III colorectal cancer, 10 year follow up                                                                                                                                                                                                                                                                                                         | -1802    | Cost-Saving | Hisashige et al., 2008 (318)   |
| Oral uracil-tegafur adjuvant chemotherapy, 400 mg/m <sup>2</sup> a day for 1 year VERSUS Surgery only (total mesorectal excision) IN Japanese patients with stage III colorectal cancer, lifetime horizon                                                                                                                                                                                                                                                                                                          | -788     | Cost-Saving | Hisashige et al., 2008 (318)   |
| FOLFOX regimen: (oxaliplatin 85 mg/m <sup>2</sup> on day 1 plus LV5FU2) VERSUS FOLFIRI regimen: irinotecan 180 mg/m <sup>2</sup> on day 1 with leucovorin (LV) 100 mg/m <sup>2</sup> administered as a 2-hour infusion before 5-fluorouracil (5-FU) 400 mg/m <sup>2</sup> administered as an intravenous bolus injection, followed by 5-FU 600 mg/m <sup>2</sup> as a 22-hour infusion immediately after 5-FU bolus injection on days 1 and 2 (LV5FU2) IN United States patients with metastatic colorectal cancer | 65170    | 74000       | Tumeh et al., 2009 (319)       |
| Pharmacogenetic testing for uridine diphosphate glucuronosyltransferase 1A1 (UGT1A1*28) before irinotecan administration VERSUS Usual care- patients received a full dose of irinotecan IN US patients with metastatic colorectal cancer who were treated with combined 5-fluorouracil, leucovorin, and irinotecan                                                                                                                                                                                                 | -1360000 | Cost-Saving | Gold et al., 2009 (320)        |

**Appendix**  
**Cost-Utility Analysis of Cancer Prevention, Treatment, and Control: A Systematic Review**  
**Winn et al.**

|                                                                                                                                                                                                                                                              |        |             |                              |
|--------------------------------------------------------------------------------------------------------------------------------------------------------------------------------------------------------------------------------------------------------------|--------|-------------|------------------------------|
| Oral capecitabine VERSUS Intravenous bolus 5-fluorouracil/l-leucovorin (FU/LV) IN Patients with colon cancer in Japan                                                                                                                                        | -1     | Cost-Saving | Shiroiwa et al., 2009 (321)  |
| Cetuximab plus best supportive care VERSUS Best supportive care alone IN Patients with advanced (chemorefractory) colorectal cancer (entire study population)                                                                                                | 280423 | 320000      | Mittmann et al., 2009 (322)  |
| Cetuximab plus best supportive care VERSUS Best supportive care alone IN Patients with advanced (chemorefractory) colorectal cancer (only patients with wild-type KRAS tumors)                                                                               | 174799 | 200000      | Mittmann et al., 2009 (322)  |
| Colorectal follow-up with nurse at a special clinic VERSUS No follow-up treatment IN Colorectal cancer patients with high-risk                                                                                                                               | 4019   | 4700        | Jeyarajah et al., 2009 (323) |
| Colorectal follow-up with nurse at a special clinic VERSUS No follow-up treatment IN Colorectal cancer patients with low-risk                                                                                                                                | 3528   | 4100        | Jeyarajah et al., 2009 (323) |
| Universal immunohistochemistry (IHC) testing, BRAF testing and sequencing VERSUS No testing IN Lynch syndrome testing among newly diagnosed individuals with colorectal cancer (CRC) and testing and surveillance for CRC among their first-degree relatives | 26632  | 30000       | Mvundura et al., 2010 (324)  |
| Universal immunohistochemistry (IHC) testing and sequencing VERSUS No testing IN Lynch syndrome testing among newly diagnosed individuals with colorectal cancer (CRC) and testing and surveillance for CRC among their first-degree relatives               | 27519  | 31000       | Mvundura et al., 2010 (324)  |
| Universal microsatellite instability (MSI) testing and sequencing VERSUS No testing IN Lynch syndrome testing among newly diagnosed individuals with colorectal cancer (CRC) and testing and surveillance for CRC among their first-degree relatives         | 48983  | 56000       | Mvundura et al., 2010 (324)  |



**Appendix**  
**Cost-Utility Analysis of Cancer Prevention, Treatment, and Control: A Systematic Review**  
**Winn et al.**

|                                                                                                                                                                                                                                                                                                               |        |         |                             |
|---------------------------------------------------------------------------------------------------------------------------------------------------------------------------------------------------------------------------------------------------------------------------------------------------------------|--------|---------|-----------------------------|
| Universal genetic sequencing for 4 genes VERSUS No testing IN Lynch syndrome testing among newly diagnosed individuals with colorectal cancer (CRC) and testing and surveillance for CRC among their first-degree relatives                                                                                   | 167901 | 190000  | Mvundura et al., 2010 (324) |
| Universal immunohistochemistry (IHC) testing and sequencing VERSUS Universal immunohistochemistry (IHC) testing, BRAF testing and sequencing IN Lynch syndrome testing among newly diagnosed individuals with colorectal cancer (CRC) and testing and surveillance for CRC among their first-degree relatives | 323220 | 370000  | Mvundura et al., 2010 (324) |
| Universal microsatellite instability (MSI) testing and sequencing VERSUS Universal immunohistochemistry (IHC) testing and sequencing IN Lynch syndrome testing among newly diagnosed individuals with colorectal cancer (CRC) and testing and surveillance for CRC among their first-degree relatives         | 902602 | 1000000 | Mvundura et al., 2010 (324) |
| Universal genetic sequencing for 4 genes VERSUS Universal microsatellite instability (MSI) testing and sequencing IN Lynch syndrome testing among newly diagnosed individuals with colorectal cancer (CRC) and testing and surveillance for CRC among their first-degree relatives                            | 869689 | 990000  | Mvundura et al., 2010 (324) |
| Age-targeted immunohistochemistry (IHC) testing, BRAF testing and sequencing VERSUS No testing IN Lynch syndrome testing among newly diagnosed individuals with colorectal cancer (CRC) younger than 50 years and testing and surveillance for CRC among their first-degree relatives                         | 9242   | 11000   | Mvundura et al., 2010 (324) |
| Age-targeted immunohistochemistry (IHC) testing and sequencing VERSUS No testing IN Lynch syndrome testing among newly diagnosed individuals with colorectal cancer (CRC) younger than 50 years and testing and surveillance for CRC among their first-degree relatives                                       | 9374   | 11000   | Mvundura et al., 2010 (324) |

**Appendix**  
**Cost-Utility Analysis of Cancer Prevention, Treatment, and Control: A Systematic Review**  
**Winn et al.**

|                                                                                                                                                                                                                                                                                                                                                                     |        |        |                             |
|---------------------------------------------------------------------------------------------------------------------------------------------------------------------------------------------------------------------------------------------------------------------------------------------------------------------------------------------------------------------|--------|--------|-----------------------------|
| Age-targeted microsatellite instability (MSI) testing and sequencing VERSUS No testing IN Lynch syndrome testing among newly diagnosed individuals with colorectal cancer (CRC) younger than 50 years and testing and surveillance for CRC among their first-degree relatives                                                                                       | 13782  | 16000  | Mvundura et al., 2010 (324) |
| Age-targeted genetic sequencing for 4 genes VERSUS No testing IN Lynch syndrome testing among newly diagnosed individuals with colorectal cancer (CRC) younger than 50 years and testing and surveillance for CRC among their first-degree relatives                                                                                                                | 52984  | 60000  | Mvundura et al., 2010 (324) |
| Age-targeted immunohistochemistry (IHC) testing and sequencing VERSUS Age-targeted immunohistochemistry (IHC) testing, BRAF testing and sequencing IN Lynch syndrome testing among newly diagnosed individuals with colorectal cancer (CRC) younger than 50 years and testing and surveillance for CRC among their first-degree relatives                           | 71471  | 82000  | Mvundura et al., 2010 (324) |
| Age-targeted microsatellite instability (MSI) testing and sequencing VERSUS Age-targeted immunohistochemistry (IHC) testing and sequencing IN Lynch syndrome testing among newly diagnosed individuals with colorectal cancer (CRC) younger than 50 years and testing and surveillance for CRC among their first-degree relatives                                   | 199308 | 230000 | Mvundura et al., 2010 (324) |
| Age-targeted genetic sequencing for 4 genes VERSUS Age-targeted microsatellite instability (MSI) testing and sequencing IN Lynch syndrome testing among newly diagnosed individuals with colorectal cancer (CRC) younger than 50 years and testing and surveillance for CRC among their first-degree relatives                                                      | 298119 | 340000 | Mvundura et al., 2010 (324) |
| Universal immunohistochemistry (IHC) testing, BRAF testing and sequencing VERSUS Age-targeted immunohistochemistry (IHC) testing, BRAF testing and sequencing among patients younger than 50 years IN Lynch syndrome testing among newly diagnosed individuals with colorectal cancer (CRC) and testing and surveillance for CRC among their first-degree relatives | 43672  | 50000  | Mvundura et al., 2010 (324) |

**Appendix**  
**Cost-Utility Analysis of Cancer Prevention, Treatment, and Control: A Systematic Review**  
**Winn et al.**

|                                                                                                                                                                                                                                                                                                                                                       |         |         |                             |
|-------------------------------------------------------------------------------------------------------------------------------------------------------------------------------------------------------------------------------------------------------------------------------------------------------------------------------------------------------|---------|---------|-----------------------------|
| Universal immunohistochemistry (IHC) testing and sequencing VERSUS Age-targeted immunohistochemistry (IHC) testing and then sequencing among patients younger than 50 years IN Lynch syndrome testing among newly diagnosed individuals with colorectal cancer (CRC) and testing and surveillance for CRC among their first-degree relatives          | 45325   | 52000   | Mvundura et al., 2010 (324) |
| Universal microsatellite instability (MSI) testing and sequencing VERSUS Age-targeted microsatellite instability (MSI) testing and sequencing among patients younger than 50 years IN Lynch syndrome testing among newly diagnosed individuals with colorectal cancer (CRC) and testing and surveillance for CRC among their first-degree relatives   | 83535   | 95000   | Mvundura et al., 2010 (324) |
| Universal genetic sequencing for 4 genes VERSUS Age-targeted genetic sequencing for 4 genes among patients younger than 50 years IN Lynch syndrome testing among newly diagnosed individuals with colorectal cancer (CRC) and testing and surveillance for CRC among their first-degree relatives                                                     | 279988  | 320000  | Mvundura et al., 2010 (324) |
| Universal microsatellite instability (MSI) testing and sequencing VERSUS Age-targeted immunohistochemistry (IHC) testing and sequencing among patients younger than 50 years IN Lynch syndrome testing among newly diagnosed individuals with colorectal cancer (CRC) and testing and surveillance for CRC among their first-degree relatives         | 1599974 | 1800000 | Mvundura et al., 2010 (324) |
| Universal immunohistochemistry (IHC) testing and sequencing VERSUS Age-targeted immunohistochemistry (IHC) testing, BRAF testing and sequencing among patients younger than 50 years IN Lynch syndrome testing among newly diagnosed individuals with colorectal cancer (CRC) and testing and surveillance for CRC among their first-degree relatives | 507368  | 580000  | Mvundura et al., 2010 (324) |
| Universal genetic sequencing for 4 genes VERSUS Age-targeted microsatellite instability (MSI) testing and sequencing among patients younger than 50 years IN Lynch syndrome testing among newly diagnosed individuals with colorectal cancer (CRC) and testing and surveillance for CRC among their first-degree relatives                            | 1407238 | 1600000 | Mvundura et al., 2010 (324) |

**Appendix**  
**Cost-Utility Analysis of Cancer Prevention, Treatment, and Control: A Systematic Review**  
**Winn et al.**

|                                                                                                                                                                                                                                                                                                                                    |         |                                   |                            |
|------------------------------------------------------------------------------------------------------------------------------------------------------------------------------------------------------------------------------------------------------------------------------------------------------------------------------------|---------|-----------------------------------|----------------------------|
| Oxaliplatin/5-Fluorouracil/Leucovorin in the Treatment of Colon Cancer VERSUS 5-Fluorouracil/Leucovorin in the Treatment of Colon Cancer IN Stage 2 or Stage 3 (II or III) colorectal cancer patients treated within the Canadian healthcare system, aged 18 to 75 y.o. who have undergone surgical resection within past 7 weeks. | 21261   | 25000                             | Attard et al., 2010 (325)  |
| Screen high-risk patients every 3 years and all others every ten years (3/10) VERSUS Screen all patients with colonoscopy every ten years (10/10) IN 50-year-old newly diagnosed with colonic adenomas                                                                                                                             | 5743    | 6300                              | Saini et al., 2010 (326)   |
| Screen high-risk patients every 3 years and all others every 5 years (3/5) VERSUS Screen high-risk patients every 3 years and all others every ten years (3/10) IN 50-year-old newly diagnosed with colonic adenomas                                                                                                               | 296266  | 330000                            | Saini et al., 2010 (326)   |
| Screen high-risk patients every 3 years and all others every 5 years (3/5) VERSUS Screen high-risk patients every 3 years and all others every 3 years (3/3) IN 50-year-old newly diagnosed with colonic adenomas                                                                                                                  | -767826 | Increases Costs, Decreases Health | Saini et al., 2010 (326)   |
| Treatment with chemotherapeutic agents VERSUS No treatment of chemotherapeutic agents IN 12473 patients aged 66 and older diagnosed with stage IV colorectal cancer between January 1, 1995 and December 31, 2005.                                                                                                                 | 99100   | 120000                            | Howard et al., 2010 (327)  |
| Colorectal cancer screening with CT colonography every 10 years VERSUS Screening with fecal occult blood testing (FOBT) biennially IN UK adults aged 60-69 years                                                                                                                                                                   | -1101   | Cost-Saving                       | Lee et al., 2010 (328)     |
| Colorectal cancer screening with optical colonoscopy VERSUS Screening with fecal occult blood testing (FOBT) biennially IN UK adults aged 60-69 years                                                                                                                                                                              | 56056   | 64000                             | Lee et al., 2010 (328)     |
| Colorectal cancer screening with flexible sigmoidoscopy VERSUS Screening with CT colonography every 10 years IN UK adults aged 60-69 years                                                                                                                                                                                         | -36036  | Increases Costs, Decreases Health | Lee et al., 2010 (328)     |
| Fecal ummunichemical test annually VERSUS Low-sensitivity guaiac fecal occult blood test annually IN People aged 50 years with risk of colorectal cancer in Canada                                                                                                                                                                 | 572     | 650                               | Telford et al., 2010 (329) |
| Colonoscopy every 10 years VERSUS Fecal immunichemical test annually IN People aged 50 years with risk of colorectal cancer in Canada                                                                                                                                                                                              | 4305    | 4900                              | Telford et al., 2010 (329) |

**Appendix**  
**Cost-Utility Analysis of Cancer Prevention, Treatment, and Control: A Systematic Review**  
**Winn et al.**

|                                                                                                                                                                                                                                      |          |                                   |                                           |
|--------------------------------------------------------------------------------------------------------------------------------------------------------------------------------------------------------------------------------------|----------|-----------------------------------|-------------------------------------------|
| Low-sensitivity guaiac fecal occult blood test annually VERSUS No screening test IN People aged 50 years with risk of colorectal cancer in Canada                                                                                    | 8572     | 9800                              | Telford et al., 2010 (329)                |
| No Screening VERSUS Mid performance fecal immunochemical tests (FIT) IN Average-risk patients aged 50-64 years                                                                                                                       | -1427    | Increases Costs, Decreases Health | Heitman et al., 2010 (330)                |
| High performance fecal immunochemical tests (FIT) VERSUS Mid performance fecal immunochemical tests (FIT) IN Average-risk patients aged 50-64 years                                                                                  | 99609    | 110000                            | Heitman et al., 2010 (330)                |
| Colonoscopy VERSUS Mid performance fecal immunochemical tests (FIT) IN Average-risk patients aged 50-64 years                                                                                                                        | -63023   | Increases Costs, Decreases Health | Heitman et al., 2010 (330)                |
| Performing KRAS testing for cetuximab with irinotecan combination therapy VERSUS Best supportive care (NoKRAS test, no treatment) IN Patients diagnosed with stage IV metastatic colorectal cancer (mCRC) refractory to chemotherapy | 37599    | 41000                             | Health Quality Ontario et al., 2010 (331) |
| Cetuximab with irinotecan combination therapy VERSUS Performing KRAS testing for cetuximab with irinotecan combination therapy IN Patients diagnosed with stage IV metastatic colorectal cancer (mCRC) refractory to chemotherapy    | 143844   | 160000                            | Health Quality Ontario et al., 2010 (331) |
| Performing KRAS testing for cetuximab therapy VERSUS Best supportive care (NoKRAS test, no treatment) IN Patients diagnosed with stage IV metastatic colorectal cancer (mCRC) refractory to chemotherapy                             | 48244    | 53000                             | Health Quality Ontario et al., 2010 (331) |
| Cetuximab therapy VERSUS Performing KRAS testing for cetuximab therapy IN Patients diagnosed with stage IV metastatic colorectal cancer (mCRC) refractory to chemotherapy                                                            | -1085168 | Increases Costs, Decreases Health | Health Quality Ontario et al., 2010 (331) |
| Panitumumab therapy VERSUS Performing KRAS testing for panitumumab therapy IN Patients diagnosed with stage IV metastatic colorectal cancer (mCRC) refractory to chemotherapy                                                        | 271353   | 300000                            | Health Quality Ontario et al., 2010 (331) |

**Appendix**  
**Cost-Utility Analysis of Cancer Prevention, Treatment, and Control: A Systematic Review**  
**Winn et al.**

|                                                                                                                                                                                                                                                                  |        |             |                                           |
|------------------------------------------------------------------------------------------------------------------------------------------------------------------------------------------------------------------------------------------------------------------|--------|-------------|-------------------------------------------|
| Performing KRAS testing for panitumumab therapy VERSUS Best supportive care (No KRAS test, no treatment) IN Patients diagnosed with stage IV metastatic colorectal cancer (mCRC) refractory to chemotherapy                                                      | 42076  | 46000       | Health Quality Ontario et al., 2010 (331) |
| Oxaliplatin (FOLFOX) with bevacizumab followed by irinotecan (FOLFIR) VERSUS Oxaliplatin (FOLFOX) followed by irinotecan (FOLFIR) IN Indian patients with metastatic colorectal cancer                                                                           | 9300   | 10000       | Dranitsaris et al., 2011 (332)            |
| Peri-operative (heptatectomy) chemotherapy VERSUS Post-operative (heptatectomy) chemotherapy IN Italian patients with cancer of the liver and candidates for hepatectomy                                                                                         | 12576  | 14000       | Ercolani et al., 2011 (333)               |
| KRAS mutation testing followed by cetuximab in patients tested positive VERSUS KRAS and BRAF mutation testing followed by cetuximab in patients tested positive IN Metastatic colorectal cancer (mCRC) patients aged 50 years                                    | 414946 | 450000      | Blank et al., 2011 (334)                  |
| No testing and treatment with cetuximab VERSUS KRAS mutation testing followed by cetuximab in patients tested positive IN Metastatic colorectal cancer (mCRC) patients aged 50 years                                                                             | 397151 | 430000      | Blank et al., 2011 (334)                  |
| KRAS and BRAF mutation testing followed by cetuximab in patients tested positive VERSUS Best supportive care IN Metastatic colorectal cancer (mCRC) patients aged 50 years                                                                                       | 82917  | 90000       | Blank et al., 2011 (334)                  |
| Adjuvant therapy with capecitabine VERSUS Standard treatment-adjuvant therapy with intravenous bolus 5-fluorouracil (5-FU) and leucovorin (LU) for 6-8 months (either weekly or monthly) IN Patients with resected confirmed stage III colon carcinoma in Taiwan | -5399  | Cost-Saving | Hsu et al., 2011 (335)                    |
| Screening plus celecoxib chemoprevention VERSUS Screening IN UK general population aged 50 - 60 years                                                                                                                                                            | 82016  | 90000       | Squires et al., 2011 (336)                |
| Screening plus calcium chemoprevention VERSUS Screening IN UK general population aged 50 - 60 years                                                                                                                                                              | 14431  | 16000       | Squires et al., 2011 (336)                |
| Screening plus aspirin chemoprevention VERSUS Screening IN UK general population aged 50 - 60 years                                                                                                                                                              | 27242  | 30000       | Squires et al., 2011 (336)                |
| 10,000 Steps of Ghent, a pedometer based community project VERSUS None IN 25-75 year old-women living in a mid-sized city                                                                                                                                        | -5409  | Cost-Saving | De Smedt et al., 2011 (337)               |

**Appendix**  
**Cost-Utility Analysis of Cancer Prevention, Treatment, and Control: A Systematic Review**  
**Winn et al.**

|                                                                                                                                                                                                                                                                |         |                                   |                             |
|----------------------------------------------------------------------------------------------------------------------------------------------------------------------------------------------------------------------------------------------------------------|---------|-----------------------------------|-----------------------------|
| 10,000 Steps of Ghent, a pedometer based community project VERSUS None IN 25-75 year-old men living in a mid-sized city                                                                                                                                        | -5017   | Cost-Saving                       | De Smedt et al., 2011 (337) |
| Conventional clinical assessment (CCA) + central venous pressure (CVP) + esophageal doppler monitoring (EDM) for hemodynamic control VERSUS Conventional clinical assessment (CCA) + central venous pressure (CVP) IN Patients undergoing colorectal resection | -5412   | Cost-Saving                       | Maeso et al., 2011 (338)    |
| Conventional clinical assessment (CCA) + central venous pressure (CVP) + esophageal doppler monitoring (EDM) for hemodynamic control VERSUS Conventional clinical assessment (CCA) IN Patients undergoing colorectal resection                                 | -415    | Cost-Saving                       | Maeso et al., 2011 (338)    |
| Conventional clinical assessment (CCA) + esophageal doppler monitoring (EDM) for hemodynamic control VERSUS Conventional clinical assessment (CCA) IN Patients undergoing colorectal resection                                                                 | -26233  | Cost-Saving                       | Maeso et al., 2011 (338)    |
| Conventional clinical assessment (CCA) + central venous pressure (CVP) + esophageal doppler monitoring (EDM) for hemodynamic control VERSUS Conventional clinical assessment (CCA) + esophageal doppler monitoring IN Patients undergoing colorectal resection | 163     | 190                               | Maeso et al., 2011 (338)    |
| Irinotecan-based regiment VERSUS 5-fluorouracil/leucovorin IN US elderly patients aged 66 years or over with stage IV colon cancer                                                                                                                             | 1071750 | 1200000                           | Mullins et al., 2012 (339)  |
| Oxaliplatin-based regiment VERSUS 5-fluorouracil/leucovorin IN US elderly patients aged 66 years or over with stage IV colon cancer                                                                                                                            | 312725  | 350000                            | Mullins et al., 2012 (339)  |
| Oxaliplatin-based regiment VERSUS Irinotecan-based regiment IN US elderly patients aged 66 years or over with stage IV colon cancer                                                                                                                            | 160920  | 180000                            | Mullins et al., 2012 (339)  |
| Annual immunohistochemical stool occult blood test (iFOBT) for colorectal cancer screening VERSUS None IN Adult population aged 50-75 years in Singapore                                                                                                       | 55000   | 60000                             | Dan et al., 2012 (340)      |
| Double-contrast barium enema every 5 years for colorectal cancer screening VERSUS Annual immunohistochemical stool occult blood test (iFOBT) IN Adult population aged 50-75 years in Singapore                                                                 | 471542  | Increases Costs, Decreases Health | Dan et al., 2012 (340)      |

**Appendix**  
**Cost-Utility Analysis of Cancer Prevention, Treatment, and Control: A Systematic Review**  
**Winn et al.**

|                                                                                                                                                                                                                                                                                                     |       |                                   |                          |
|-----------------------------------------------------------------------------------------------------------------------------------------------------------------------------------------------------------------------------------------------------------------------------------------------------|-------|-----------------------------------|--------------------------|
| Single colonoscopy at age 60 for colorectal cancer screening VERSUS Double-contrast barium enema every 5 years IN Adult population aged 50-75 years in Singapore                                                                                                                                    | 19000 | 21000                             | Dan et al., 2012 (340)   |
| Sigmoidoscopy every 5 years for colorectal cancer screening VERSUS Single colonoscopy at age 60 IN Adult population aged 50-75 years in Singapore                                                                                                                                                   | 91745 | Increases Costs, Decreases Health | Dan et al., 2012 (340)   |
| Sigmoidoscopy every 5 years plus annual immunohistochemistry stool occult blood test (iFOBT) for colorectal cancer screening VERSUS Sigmoidoscopy every 5 years IN Adult population aged 50-75 years in Singapore                                                                                   | 44392 | 48000                             | Dan et al., 2012 (340)   |
| Stool DNA screening every 5 years for colorectal cancer screening VERSUS Sigmoidoscopy every 5 years plus annual immunohistochemistry stool occult blood test (iFOBT) IN Adult population aged 50-75 years in Singapore                                                                             |       | Increases Costs, Decreases Health | Dan et al., 2012 (340)   |
| Colonoscopy every 10 years for colorectal cancer screening VERSUS Stool DNA every 5 years IN Adult population aged 50-75 years in Singapore                                                                                                                                                         | 25223 | 27000                             | Dan et al., 2012 (340)   |
| Computed tomographic colonography every 5 years for colorectal cancer screening VERSUS Colonoscopy every 10 years IN Adult population aged 50-75 years in Singapore                                                                                                                                 |       | Increases Costs, Decreases Health | Dan et al., 2012 (340)   |
| Single sigmoidoscopy at age 60 for colorectal cancer screening VERSUS None IN Adult population aged 50-75 years in Singapore                                                                                                                                                                        | 23667 | 26000                             | Dan et al., 2012 (340)   |
| First-line doublet therapy with modification of de Gramont regimen (MdG) and oxaliplatin (OxMdG) VERSUS First-line fluorouracil until treatment failure followed by single agent irinotecan IN UK patients diagnosed with colorectal cancer                                                         | 82459 | 91000                             | Manca et al., 2012 (341) |
| First-line modification of de Gramont regimen (MdG) regimen until treatment failure followed by doublet therapy with MdG and oxaliplatin (OxMdG regimen) VERSUS First-line fluorouracil until treatment failure followed by single agent irinotecan IN UK patients diagnosed with colorectal cancer | 41809 | 46000                             | Manca et al., 2012 (341) |



**Appendix**  
**Cost-Utility Analysis of Cancer Prevention, Treatment, and Control: A Systematic Review**  
**Winn et al.**

|                                                                                                                                                                                                                                                                                                    |       |       |                           |
|----------------------------------------------------------------------------------------------------------------------------------------------------------------------------------------------------------------------------------------------------------------------------------------------------|-------|-------|---------------------------|
| First-line modification of de Gramont regimen (MdG) regimen until treatment failure followed by doublet therapy with MdG and irinotecan (IrMdG regimen) VERSUS First-line fluorouracil until treatment failure followed by single agent irinotecan IN UK patients diagnosed with colorectal cancer | 21683 | 24000 | Manca et al., 2012 (341)  |
| First-line combination therapy of fluorouracil plus irinotecan VERSUS First-line fluorouracil until treatment failure followed by single agent irinotecan IN UK patients diagnosed with colorectal cancer                                                                                          | 21541 | 24000 | Manca et al., 2012 (341)  |
| Bevacizumab VERSUS Usual care IN Patients aged <70 years with newly-diagnosed metastatic colorectal cancer (mCRC) in Canada                                                                                                                                                                        | 54993 | 61000 | Hedden et al., 2012 (342) |
| Bevacizumab VERSUS Usual care IN Patients aged <70 years with newly-diagnosed metastatic colorectal cancer (mCRC) who received doublet chemotherapy (5-FU/oxaliplatin or 5-FU/irinotecan) in Canada                                                                                                | 37906 | 42000 | Hedden et al., 2012 (342) |
| Biennial guaiac-based faecal occult blood test (gFOBT) with reflex faecal immunochemical tests (FIT) among 55-64 year individuals VERSUS None IN Adult population of Ireland                                                                                                                       | 5320  | 5800  | Sharp et al., 2012 (343)  |
| Biennial guaiac-based faecal occult blood test (gFOBT) with reflex faecal immunochemical tests (FIT) among 65-74 year individuals VERSUS None IN Adult population of Ireland                                                                                                                       | 11044 | 12000 | Sharp et al., 2012 (343)  |
| Biennial reflex faecal immunochemical tests (FIT) among 55-74 year individuals VERSUS None IN Adult population of Ireland                                                                                                                                                                          | 2497  | 2700  | Sharp et al., 2012 (343)  |
| Biennial reflex faecal immunochemical tests (FIT) among 55-64 year individuals VERSUS None IN Adult population of Ireland                                                                                                                                                                          | 2677  | 2900  | Sharp et al., 2012 (343)  |
| Biennial reflex faecal immunochemical tests (FIT) among 65-74 year individuals VERSUS None IN Adult population of Ireland                                                                                                                                                                          | 2500  | 2700  | Sharp et al., 2012 (343)  |

**Appendix**  
**Cost-Utility Analysis of Cancer Prevention, Treatment, and Control: A Systematic Review**  
**Winn et al.**

|                                                                                                                                                                                                                                                                                    |      |      |                          |
|------------------------------------------------------------------------------------------------------------------------------------------------------------------------------------------------------------------------------------------------------------------------------------|------|------|--------------------------|
| Once-only flexible sigmoidoscopy (F-SIG) at age 60 VERSUS None IN Adult population of Ireland                                                                                                                                                                                      | 867  | 950  | Sharp et al., 2012 (343) |
| Once-only flexible sigmoidoscopy (F-SIG) at age 55 VERSUS None IN Adult population of Ireland                                                                                                                                                                                      | 3916 | 4300 | Sharp et al., 2012 (343) |
| Biennial guaiac-based faecal occult blood test (gFOBT) with reflex faecal immunochemical tests (FIT) among 55-74 year individuals VERSUS None IN Adult population of Ireland                                                                                                       | 6520 | 7200 | Sharp et al., 2012 (343) |
| Flexible sigmoidoscopy at age 55 followed by immunochemical faecal occult blood test at age 56-74 years (biennial) for colorectal cancer VERSUS Guaiac faecal occult blood test at age 60-74 years (biennial) IN General population with normal colon/rectal epithelium in England | 1135 | 1200 | Whyte et al., 2012 (344) |
| Flexible sigmoidoscopy at age 55 followed by immunochemical faecal occult blood test at age 60-74 years (biennial) for colorectal cancer VERSUS Guaiac faecal occult blood test at age 60-74 years (biennial) IN General population with normal colon/rectal epithelium in England | 1184 | 1300 | Whyte et al., 2012 (344) |
| Flexible sigmoidoscopy at age 55 followed by immunochemical faecal occult blood test at age 60,65,70 years VERSUS Guaiac faecal occult blood test at age 60-74 years (biennial) IN General population with normal colon/rectal epithelium in England                               | 3331 | 3600 | Whyte et al., 2012 (344) |
| Flexible sigmoidoscopy at age 55 followed by immunochemical faecal occult blood test at age 66-74 years (biennial) for colorectal cancer VERSUS Guaiac faecal occult blood test at age 60-74 years (biennial) IN General population with normal colon/rectal epithelium in England | 2547 | 2800 | Whyte et al., 2012 (344) |
| Flexible sigmoidoscopy at age 55 followed by guaiac faecal occult blood test at age 66-74 years (biennial) for colorectal cancer VERSUS Guaiac faecal occult blood test at age 60-74 years (biennial) IN General population with normal colon/rectal epithelium in England         | 5700 | 6200 | Whyte et al., 2012 (344) |
| Flexible sigmoidoscopy at age 55 and 65 years for colorectal cancer VERSUS Guaiac faecal occult blood test at age 60-74 years (biennial) IN General population with normal colon/rectal epithelium in England                                                                      | 6861 | 7400 | Whyte et al., 2012 (344) |

**Appendix**  
**Cost-Utility Analysis of Cancer Prevention, Treatment, and Control: A Systematic Review**  
**Winn et al.**

|                                                                                                                                                                                                                                                                                                                  |       |             |                             |
|------------------------------------------------------------------------------------------------------------------------------------------------------------------------------------------------------------------------------------------------------------------------------------------------------------------|-------|-------------|-----------------------------|
| Flexible sigmoidoscopy at age 55 years for colorectal cancer VERSUS Guaiac faecal occult blood test at age 60-74 years (biennial) IN General population with normal colon/rectal epithelium in England                                                                                                           | 16724 | 18000       | Whyte et al., 2012 (344)    |
| Immunochemical faecal occult blood test at age 60-74 years (biennial) for colorectal cancer VERSUS Guaiac faecal occult blood test at age 60-74 years (biennial) IN General population with normal colon/rectal epithelium in England                                                                            | -2702 | Cost-Saving | Whyte et al., 2012 (344)    |
| Immunochemical faecal occult blood test at age 60-69 years (biennial) for colorectal cancer VERSUS Guaiac faecal occult blood test at age 60-74 years (biennial) IN General population with normal colon/rectal epithelium in England                                                                            | -2386 | Cost-Saving | Whyte et al., 2012 (344)    |
| Immunochemical faecal occult blood test at age 60, 65, 70 years for colorectal cancer VERSUS Guaiac faecal occult blood test at age 60-74 years (biennial) IN General population with normal colon/rectal epithelium in England                                                                                  | -1029 | Cost-Saving | Whyte et al., 2012 (344)    |
| FOLFOX regimen: 5-fluorouracil/leucovorin (FU/LV) + oxaliplatin VERSUS Standard 5-fluorouracil/leucovorin (FU/LV) IN Patients with stage III colorectal cancer in Japan                                                                                                                                          | 2     | 2           | Shiroiwa et al., 2012 (345) |
| Prediction tool/statistical model (MMRpro) + immunohistochemistry tumor-testing strategy VERSUS Referent strategy IN Patients with newly diagnosed colorectal cancer and their relatives subject to different strategies for identifying Lynch syndrome                                                          | 50562 | 55000       | Wang et al., 2012 (346)     |
| Bethesda clinical guidelines + immunohistochemistry tumor-testing strategy VERSUS Prediction tool/statistical model (MMRpro) + immunohistochemistry tumor-testing strategy IN Patients with newly diagnosed colorectal cancer and their relatives subject to different strategies for identifying Lynch syndrome | 65347 | 71000       | Wang et al., 2012 (346)     |
| Prediction tool/statistical model (MMRpro) + germline testing VERSUS Bethesda clinical guidelines + immunohistochemistry tumor-testing strategy IN Patients with newly diagnosed colorectal cancer and their relatives subject to different strategies for identifying Lynch syndrome                            | 68384 | 74000       | Wang et al., 2012 (346)     |

**Appendix**  
**Cost-Utility Analysis of Cancer Prevention, Treatment, and Control: A Systematic Review**  
**Winn et al.**

|                                                                                                                                                                                                                                                                                                                             |        |        |                         |
|-----------------------------------------------------------------------------------------------------------------------------------------------------------------------------------------------------------------------------------------------------------------------------------------------------------------------------|--------|--------|-------------------------|
| Bethesda clinical guidelines + germline testing VERSUS Prediction tool/statistical model (MMRpro) + germline testing IN Patients with newly diagnosed colorectal cancer and their relatives subject to different strategies for identifying Lynch syndrome                                                                  | 82864  | 90000  | Wang et al., 2012 (346) |
| Combination of immunohistochemistry and BRAF gene tumor-testing strategies VERSUS Referent strategy IN Patients with newly diagnosed colorectal cancer and their relatives subject to different strategies for identifying Lynch syndrome                                                                                   | 59719  | 65000  | Wang et al., 2012 (346) |
| Combination of microsatellite instability testing and immunohistochemistry tumor-testing strategies VERSUS Combination of immunohistochemistry and BRAF gene tumor-testing strategies IN Patients with newly diagnosed colorectal cancer and their relatives subject to different strategies for identifying Lynch syndrome | 179576 | 190000 | Wang et al., 2012 (346) |
| Combination of microsatellite instability testing, immunohistochemistry, and BRAF gene tumor-testing strategies VERSUS Bethesda guidelines + germline testing IN Patients with newly diagnosed colorectal cancer and their relatives subject to different strategies for identifying Lynch syndrome                         | 193343 | 210000 | Wang et al., 2012 (346) |
| Upfront germline testing strategy VERSUS Combination of microsatellite instability testing, immunohistochemistry, and BRAF gene tumor-testing strategies IN Patients with newly diagnosed colorectal cancer and their relatives subject to different strategies for identifying Lynch syndrome                              | 393303 | 430000 | Wang et al., 2012 (346) |
| Upfront germline testing strategy VERSUS Combination of microsatellite instability testing and immunohistochemistry tumor-testing strategies IN Patients with newly diagnosed colorectal cancer and their relatives subject to different strategies for identifying Lynch syndrome                                          | 384821 | 420000 | Wang et al., 2012 (346) |
| MMRpro/IHC (immunohistochemistry) clinical criteria and algorithm strategy for Lynch syndrome screening VERSUS None IN US men and women newly diagnosed with colorectal cancer and their relatives                                                                                                                          | 50562  | 55000  | Wang et al., 2012 (347) |
| Bethesda/IHC (immunohistochemistry) clinical criteria and algorithm strategy for Lynch syndrome screening VERSUS MMRpro/IHC (immunohistochemistry) clinical criteria and algorithm strategy IN US men and women newly diagnosed with colorectal cancer and their                                                            | 65347  | 71000  | Wang et al., 2012 (347) |

**Appendix**  
**Cost-Utility Analysis of Cancer Prevention, Treatment, and Control: A Systematic Review**  
**Winn et al.**

| relatives                                                                                                                                                                                                                                                     |          |             |                            |
|---------------------------------------------------------------------------------------------------------------------------------------------------------------------------------------------------------------------------------------------------------------|----------|-------------|----------------------------|
| MMRpro/germline clinical criteria and algorithm strategy for Lynch syndrome screening VERSUS Bethesda/IHC (immunohistochemistry) clinical criteria and algorithm strategy IN US men and women newly diagnosed with colorectal cancer and their relatives      | 68384    | 74000       | Wang et al., 2012 (347)    |
| Bethesda/germline clinical criteria and algorithm strategy for Lynch syndrome screening VERSUS MMRpro/germline clinical criteria and algorithm strategy IN US men and women newly diagnosed with colorectal cancer and their relatives                        | 82864    | 90000       | Wang et al., 2012 (347)    |
| Microsatellite instability testing (MSI) plus IHC/BRAF tumor testing strategy for identifying Lynch syndrome VERSUS Bethesda/germline clinical criteria and algorithm strategy IN US men and women newly diagnosed with colorectal cancer and their relatives | 193343   | 210000      | Wang et al., 2012 (347)    |
| Upfront germline testing for Lynch syndrome VERSUS Microsatellite instability testing (MSI) plus IHC/BRAF tumor testing strategy IN US men and women newly diagnosed with colorectal cancer and their relatives                                               | 393303   | 430000      | Wang et al., 2012 (347)    |
| IHC/BRAF tumor testing strategy for identifying Lynch syndrome VERSUS None IN US men and women newly diagnosed with colorectal cancer and their relatives                                                                                                     | 59719    | 65000       | Wang et al., 2012 (347)    |
| Microsatellite instability testing (MSI) plus IHC/BRAF tumor testing strategy for identifying Lynch syndrome VERSUS IHC/BRAF tumor testing strategy IN US men and women newly diagnosed with colorectal cancer and their relatives                            | 179576   | 190000      | Wang et al., 2012 (347)    |
| Upfront germline testing for Lynch syndrome VERSUS Microsatellite instability testing (MSI) plus IHC/BRAF tumor testing strategy IN US men and women newly diagnosed with colorectal cancer and their relatives                                               | 384821   | 420000      | Wang et al., 2012 (347)    |
| Laparoscopic surgery VERSUS Open resection IN US patients with colon and rectal cancer                                                                                                                                                                        | -4283000 | Cost-Saving | Jensen et al., 2012 (348)  |
| Colonoscopy performed every 10 years VERSUS Fecal immunochemical test performed annually IN Adults aged 50 years with average risk for colorectal cancer in Iran                                                                                              | 4600     | 4800        | Barouni et al., 2012 (349) |

**Appendix**  
**Cost-Utility Analysis of Cancer Prevention, Treatment, and Control: A Systematic Review**  
**Winn et al.**

|                                                                                                                                                                                                                                                                                                                                                                                                                                                    |        |             |                               |
|----------------------------------------------------------------------------------------------------------------------------------------------------------------------------------------------------------------------------------------------------------------------------------------------------------------------------------------------------------------------------------------------------------------------------------------------------|--------|-------------|-------------------------------|
| Fecal immunochemical test performed annually VERSUS Low-sensitivity guaiac fecal occult blood test screening strategy performed annually IN Adults aged 50 years with average risk for colorectal cancer in Iran                                                                                                                                                                                                                                   | 550    | 580         | Barouni et al., 2012 (349)    |
| Low-sensitivity guaiac fecal occult blood test screening strategy performed annually VERSUS None IN Adults aged 50 years with average risk for colorectal cancer in Iran                                                                                                                                                                                                                                                                           | 10533  | 11000       | Barouni et al., 2012 (349)    |
| Multigene recurrence score (RS) assay for patients recently diagnosed with stage II colon cancer eligible for adjuvant chemotherapy VERSUS Examination of guideline-recommended clinicopathological factors ((tumor stage, lymph nodes examined, tumor grade and lymphovascular invasion) IN Patients with stage II colon cancer (T3, proficient DNA mismatch repair) who have undergone surgery with lymphovascular invasion and high grade tumor | -84886 | Cost-Saving | Hornberger et al., 2012 (350) |
| Fecal occult blood testing (FOBT) yearly VERSUS None IN Healthy; Age- 41 to 64 years, >=65 years; Gender- Not Specified; Country- United States; Other- 50-80 years.                                                                                                                                                                                                                                                                               | -6171  | Cost-Saving | Sharaf et al., 2013 (351)     |
| Flexible sigmoidoscopy (FS) every 5 years VERSUS None IN Healthy; Age- 41 to 64 years, >=65 years; Gender- Not Specified; Country- United States; Other- 50-80 years.                                                                                                                                                                                                                                                                              | -2974  | Cost-Saving | Sharaf et al., 2013 (351)     |
| Colonoscopy every 10 years VERSUS None IN Healthy; Age- 41 to 64 years, >=65 years; Gender- Not Specified; Country- United States; Other- 50-80 years.                                                                                                                                                                                                                                                                                             | 2640   | 2900        | Sharaf et al., 2013 (351)     |
| Fecal immunochemical testing (FIT) yearly VERSUS None IN Healthy; Age- 41 to 64 years, >=65 years; Gender- Not Specified; Country- United States; Other- 50-80 years.                                                                                                                                                                                                                                                                              | -6468  | Cost-Saving | Sharaf et al., 2013 (351)     |
| Flexible sigmoidoscopy (FS) every 5 years and Fecal immunochemical testing (FIT) every 3 years VERSUS None IN Healthy; Age- 41 to 64 years, >=65 years; Gender- Not Specified; Country- United States; Other- 50-80 years.                                                                                                                                                                                                                         | -1775  | Cost-Saving | Sharaf et al., 2013 (351)     |
| Fecal occult blood testing (FOBT) yearly VERSUS Flexible sigmoidoscopy (FS) once in lifetime IN Healthy; Age- 41 to 64 years, >=65 years; Gender- Not Specified; Country- United States; Other- 50-80 years.                                                                                                                                                                                                                                       | -3391  | Cost-Saving | Sharaf et al., 2013 (351)     |

**Appendix**  
**Cost-Utility Analysis of Cancer Prevention, Treatment, and Control: A Systematic Review**  
**Winn et al.**

|                                                                                                                                                                                                                                                                    |        |             |                           |
|--------------------------------------------------------------------------------------------------------------------------------------------------------------------------------------------------------------------------------------------------------------------|--------|-------------|---------------------------|
| Flexible sigmoidoscopy (FS) every 5 years VERSUS Flexible sigmoidoscopy (FS) once in lifetime IN Healthy; Age- 41 to 64 years, >=65 years; Gender- Not Specified; Country- United States; Other- 50-80 years.                                                      | 1700   | 1800        | Sharaf et al., 2013 (351) |
| Colonoscopy every 10 years VERSUS Flexible sigmoidoscopy (FS) once in lifetime IN Healthy; Age- 41 to 64 years, >=65 years; Gender- Not Specified; Country- United States; Other- 50-80 years.                                                                     | 9600   | 10000       | Sharaf et al., 2013 (351) |
| Fecal immunochemical testing (FIT) yearly VERSUS Flexible sigmoidoscopy (FS) once in lifetime IN Healthy; Age- 41 to 64 years, >=65 years; Gender- Not Specified; Country- United States; Other- 50-80 years.                                                      | -4409  | Cost-Saving | Sharaf et al., 2013 (351) |
| Flexible sigmoidoscopy (FS) every 5 years and Fecal immunochemical testing (FIT) every 3 years VERSUS Flexible sigmoidoscopy (FS) once in lifetime IN Healthy; Age- 41 to 64 years, >=65 years; Gender- Not Specified; Country- United States; Other- 50-80 years. | 2580   | 2800        | Sharaf et al., 2013 (351) |
| Flexible sigmoidoscopy (FS) every 5 years VERSUS Fecal occult blood testing (FOBT) yearly IN Healthy; Age- 41 to 64 years, >=65 years; Gender- Not Specified; Country- United States; Other- 50-80 years.                                                          | 105000 | 110000      | Sharaf et al., 2013 (351) |
| Colonoscopy every 10 years VERSUS Fecal occult blood testing (FOBT) yearly IN Healthy; Age- 41 to 64 years, >=65 years; Gender- Not Specified; Country- United States; Other- 50-80 years.                                                                         | 67300  | 73000       | Sharaf et al., 2013 (351) |
| Fecal immunochemical testing (FIT) yearly VERSUS Fecal occult blood testing (FOBT) yearly IN Healthy; Age- 41 to 64 years, >=65 years; Gender- Not Specified; Country- United States; Other- 50-80 years.                                                          | -8365  | Cost-Saving | Sharaf et al., 2013 (351) |
| Flexible sigmoidoscopy (FS) every 5 years and Fecal immunochemical testing (FIT) every 3 years VERSUS Fecal occult blood testing (FOBT) yearly IN Healthy; Age- 41 to 64 years, >=65 years; Gender- Not Specified; Country- United States; Other- 50-80 years.     | 23200  | 25000       | Sharaf et al., 2013 (351) |
| Colonoscopy every 10 years VERSUS Flexible sigmoidoscopy (FS) every 5 years IN Healthy; Age- 41 to 64 years, >=65 years; Gender- Not Specified; Country- United States; Other- 50-80 years.                                                                        | 56800  | 62000       | Sharaf et al., 2013 (351) |

**Appendix**  
**Cost-Utility Analysis of Cancer Prevention, Treatment, and Control: A Systematic Review**  
**Winn et al.**

|                                                                                                                                                                                                                                                                 |         |             |                           |
|-----------------------------------------------------------------------------------------------------------------------------------------------------------------------------------------------------------------------------------------------------------------|---------|-------------|---------------------------|
| Fecal immunochemical testing (FIT) yearly VERSUS Flexible sigmoidoscopy (FS) every 5 years IN Healthy; Age- 41 to 64 years, >=65 years; Gender- Not Specified; Country- United States; Other- 50-80 years.                                                      | -35000  | Cost-Saving | Sharaf et al., 2013 (351) |
| Flexible sigmoidoscopy (FS) every 5 years and Fecal immunochemical testing (FIT) every 3 years VERSUS Flexible sigmoidoscopy (FS) every 5 years IN Healthy; Age- 41 to 64 years, >=65 years; Gender- Not Specified; Country- United States; Other- 50-80 years. | 6660    | 7200        | Sharaf et al., 2013 (351) |
| Fecal immunochemical testing (FIT) yearly VERSUS Colonoscopy every 10 years IN Healthy; Age- 41 to 64 years, >=65 years; Gender- Not Specified; Country- United States; Other- 50-80 years.                                                                     | -536923 | Cost-Saving | Sharaf et al., 2013 (351) |
| Flexible sigmoidoscopy (FS) every 5 years and Fecal immunochemical testing (FIT) every 3 years VERSUS Colonoscopy every 10 years IN Healthy; Age- 41 to 64 years, >=65 years; Gender- Not Specified; Country- United States; Other- 50-80 years.                | -130385 | Cost-Saving | Sharaf et al., 2013 (351) |
| Flexible sigmoidoscopy (FS) every 5 years and Fecal immunochemical testing (FIT) every 3 years VERSUS Fecal immunochemical testing (FIT) yearly IN Healthy; Age- 41 to 64 years, >=65 years; Gender- Not Specified; Country- United States; Other- 50-80 years. | 271000  | 290000      | Sharaf et al., 2013 (351) |
| Flexible sigmoidoscopy (FS) once in lifetime VERSUS None IN Healthy; Age- 41 to 64 years, >=65 years; Gender- Not Specified; Country- United States; Other- 50-80 years.                                                                                        | -10496  | Cost-Saving | Sharaf et al., 2013 (351) |
| 5-fluorouracil, leucovorin (5FU/LV) and oxaliplatin (FOLFOX) VERSUS 5-fluorouracil, leucovorin (5FU/LV) IN Specific disease- Stage II colon cancer; Age- 41 to 64 years; Gender- Both; Country- United States; Other- undergone an uncomplicated hemicolectomy. | 54359   | 62000       | Ayvaci et al., 2013 (352) |
| 5-fluorouracil, leucovorin (5FU/LV) VERSUS None IN Specific disease- Stage II colon cancer; Age- 41 to 64 years; Gender- Both; Country- United States; Other- undergone an uncomplicated hemicolectomy.                                                         | 14584   | 17000       | Ayvaci et al., 2013 (352) |



**Appendix**  
**Cost-Utility Analysis of Cancer Prevention, Treatment, and Control: A Systematic Review**  
**Winn et al.**

|                                                                                                                                                                                                                                                                                                |        |        |                          |
|------------------------------------------------------------------------------------------------------------------------------------------------------------------------------------------------------------------------------------------------------------------------------------------------|--------|--------|--------------------------|
| Cetuximab for third and further lines of treatment for KRAS wild-type VERSUS Standard/Usual care- best supportive care IN Specific disease- Metastatic Colorectal Cancer; Age- Adult; Gender- Both; Country- United Kingdom.                                                                   | 152409 | 160000 | Hoyle et al., 2013 (353) |
| Panitumumab for third and further lines of treatment for KRAS wild-type VERSUS Standard/Usual care- best supportive care IN Specific disease- Metastatic Colorectal Cancer; Age- Adult; Gender- Both; Country- United Kingdom.                                                                 | 300004 | 320000 | Hoyle et al., 2013 (353) |
| Cetuximab plus irinotecan for third and further lines of treatment for KRAS wild-type VERSUS Standard/Usual care- best supportive care IN Specific disease- Metastatic Colorectal Cancer; Age- Adult; Gender- Both; Country- United Kingdom; Other- the median age varied from 59 to 63 years. | 141179 | 150000 | Hoyle et al., 2013 (353) |
| Annual fecal immunological test (FIT)/annual fecal immunological test and colonoscopy at age 66 (COLOx1) for colorectal cancer VERSUS Fecal immunological test (FIT) IN Healthy; Age- 41 to 64 years, >=65 years; Gender- Both; Country- United States.                                        | 9700   | 11000  | Dinh et al., 2013 (354)  |
| Concurrent fecal immunological test (FIT)/sigmoidoscopy for colorectal cancer VERSUS Annual fecal immunological test (FIT)/annual fecal immunological test and colonoscopy at age 66 (COLOx1) IN Healthy; Age- 41 to 64 years, >=65 years; Gender- Both; Country- United States.               | 11300  | 12000  | Dinh et al., 2013 (354)  |
| Concurrent fecal immunological test (FIT)/sigmoidoscopy for colorectal cancer VERSUS Annual fecal immunological test (FIT) IN Healthy; Age- 41 to 64 years, >=65 years; Gender- Both; Country- United States.                                                                                  | 9900   | 11000  | Dinh et al., 2013 (354)  |
| Colonoscopy for colorectal cancer VERSUS Annual fecal immunological test (FIT) IN Healthy; Age- 41 to 64 years, >=65 years; Gender- Both; Country- United States.                                                                                                                              | 16400  | 18000  | Dinh et al., 2013 (354)  |
| Colonoscopy for colorectal cancer VERSUS Annual fecal immunological test and colonoscopy at age 66 ( FIT/COLOx1) IN Healthy; Age- 41 to 64 years, >=65 years; Gender- Not Specified; Country- United States.                                                                                   | 35100  | 38000  | Dinh et al., 2013 (354)  |
| Colonoscopy for colorectal cancer VERSUS Concurrent annual fecal immunological (FIT)/sigmoidoscopy IN Healthy; Age- 41 to 64 years, >=65 years; Gender- Both; Country- United States.                                                                                                          | 51000  | 55000  | Dinh et al., 2013 (354)  |

**Appendix**  
**Cost-Utility Analysis of Cancer Prevention, Treatment, and Control: A Systematic Review**  
**Winn et al.**

|                                                                                                                                                                                                                                        |       |             |                            |
|----------------------------------------------------------------------------------------------------------------------------------------------------------------------------------------------------------------------------------------|-------|-------------|----------------------------|
| Concurrent fecal immunological test (FIT)/sigmoidoscopy for colorectal cancer VERSUS None IN Healthy; Age- 41 to 64 years, >=65 years; Gender- Both; Country- United States.                                                           |       | Cost-Saving | Dinh et al., 2013 (354)    |
| Concurrent fecal immunological test (FIT)/sigmoidoscopy for colorectal cancer VERSUS Sigmoidoscopy IN Healthy; Age- 41 to 64 years, >=65 years; Gender- Both; Country- United States.                                                  |       | Cost-Saving | Dinh et al., 2013 (354)    |
| Fecal immunological test (FIT) for colorectal cancer VERSUS None IN Healthy; Age- 41 to 64 years, >=65 years; Gender- Both; Country- United States.                                                                                    |       | Cost-Saving | Dinh et al., 2013 (354)    |
| Sigmoidoscopy for colorectal cancer VERSUS None IN Healthy; Age- 41 to 64 years, >=65 years; Gender- Both; Country- United States.                                                                                                     |       | Cost-Saving | Dinh et al., 2013 (354)    |
| Colonoscopy for colorectal cancer VERSUS Sigmoidoscopy IN Healthy; Age- 41 to 64 years, >=65 years; Gender- Both; Country- United States.                                                                                              |       | Cost-Saving | Dinh et al., 2013 (354)    |
| Colonoscopy for colorectal cancer VERSUS None IN Healthy; Age- 41 to 64 years, >=65 years; Gender- Both; Country- United States.                                                                                                       |       | Cost-Saving | Dinh et al., 2013 (354)    |
| Annual fecal immunological test (FIT)/annual fecal immunological test and colonoscopy at age 66 (COLOx1) for colorectal cancer VERSUS None IN Healthy; Age- 41 to 64 years, >=65 years; Gender- Both; Country- United States.          |       | Cost-Saving | Dinh et al., 2013 (354)    |
| Annual fecal immunological test (FIT) for colorectal cancer VERSUS Sigmoidoscopy IN Healthy; Age- 41 to 64 years, >=65 years; Gender- Both; Country- United States.                                                                    |       | Cost-Saving | Dinh et al., 2013 (354)    |
| Annual fecal immunological test (FIT)/annual fecal immunological test and colonoscopy at age 66 (COLOx1) for colorectal cancer VERSUS Sigmoidoscopy IN Healthy; Age- 41 to 64 years, >=65 years; Gender- Both; Country- United States. |       | Cost-Saving | Dinh et al., 2013 (354)    |
| Open colectomy VERSUS None IN Specific disease- Colorectal cancer; Age- Adult; Gender- Both; Country- Greece.                                                                                                                          | 31116 | 33000       | Michalopoulos et al., 2013 |

**Appendix**  
**Cost-Utility Analysis of Cancer Prevention, Treatment, and Control: A Systematic Review**  
**Winn et al.**

|                                                                                                                                                                                                                                                 |       |       | (355)                            |
|-------------------------------------------------------------------------------------------------------------------------------------------------------------------------------------------------------------------------------------------------|-------|-------|----------------------------------|
| Laparoscopic colectomy VERSUS None IN Specific disease- Colorectal cancer; Age- Adult; Gender- Both; Country- Greece.                                                                                                                           | 47897 | 50000 | Michalopoulos et al., 2013 (355) |
| Fluoropyrimidines + Oxaliplatin, Scenario 1 VERSUS fluoropyrimidines IN Specific disease- Stage III Colon Cancer; Age- Adult; Gender- Both; Country- Netherlands.                                                                               | 12558 | 13000 | van Gils et al., 2013 (356)      |
| Fluoropyrimidines + Oxaliplatin, Scenario 3 VERSUS fluoropyrimidines IN Specific disease- Stage III Colon Cancer; Age- Adult; Gender- Both; Country- Netherlands.                                                                               | 10786 | 11000 | van Gils et al., 2013 (356)      |
| Fluoropyrimidines + Oxaliplatin, Scenario 2 VERSUS fluoropyrimidines IN Specific disease- Stage III Colon Cancer; Age- Adult; Gender- Both; Country- Netherlands.                                                                               | 12580 | 13000 | van Gils et al., 2013 (356)      |
| Fluoropyrimidines + Oxaliplatin, Scenario 4 VERSUS fluoropyrimidines IN Specific disease- Stage III Colon Cancer; Age- Adult; Gender- Both; Country- Netherlands.                                                                               | 16390 | 17000 | van Gils et al., 2013 (356)      |
| Advance notification letter prior to colorectal cancer screening VERSUS current practice in the National Bowel Cancer Screening Program (NBSC) in which NO advanced letter is sent IN Healthy; Age-; Gender- Not Specified; Country- Australia. | 5519  | 6100  | Cronin et al., 2013 (357)        |
| No stenting for patients presenting with emergency symptoms VERSUS Standard/Usual Care- CT scan IN Specific disease- colorectal cancer; Age- 0 to 18 years, 19 to 40 years, 41 to 64 years, >=65 years; Gender- Both; Country- United Kingdom.  | 2363  | 2500  | Tappenden et al., 2013 (358)     |
| Preoperative chemoradiation VERSUS Preoperative radiotherapy IN Specific disease- colorectal cancer; Age- 0 to 18 years, 19 to 40 years, 41 to 64 years, >=65 years; Gender- Both; Country- United Kingdom.                                     | 29012 | 31000 | Tappenden et al., 2013 (358)     |

**Appendix**  
**Cost-Utility Analysis of Cancer Prevention, Treatment, and Control: A Systematic Review**  
**Winn et al.**

|                                                                                                                                                                                                                                                                             |        |        |                              |
|-----------------------------------------------------------------------------------------------------------------------------------------------------------------------------------------------------------------------------------------------------------------------------|--------|--------|------------------------------|
| Preoperative chemoradiation VERSUS Preoperative radiotherapy for patients presenting with locally advanced colorectal cancer IN Specific disease- colorectal cancer; Age- 0 to 18 years, 19 to 40 years, 41 to 64 years, >=65 years; Gender- Both; Country- United Kingdom. | 28980  | 30000  | Tappenden et al., 2013 (358) |
| Hepatic arterial infusion VERSUS Standard/Usual Care- Best supportive care IN Specific disease- colorectal cancer; Age- 0 to 18 years, 19 to 40 years, 41 to 64 years, >=65 years; Gender- Both; Country- United Kingdom.                                                   | 177968 | 190000 | Tappenden et al., 2013 (358) |
| Palliative chemotherapy VERSUS Standard/Usual Care- Best supportive care IN Specific disease- colorectal cancer; Age- 0 to 18 years, 19 to 40 years, 41 to 64 years, >=65 years; Gender- Both; Country- United Kingdom.                                                     | 26644  | 28000  | Tappenden et al., 2013 (358) |
| Capecitabine plus oxaliplatin VERSUS Capecitabine IN Specific disease- colorectal cancer; Age- 0 to 18 years, 19 to 40 years, 41 to 64 years, >=65 years; Gender- Both; Country- United Kingdom.                                                                            | 216483 | 230000 | Tappenden et al., 2013 (358) |
| Capecitabine plus irinotecan VERSUS Capecitabine IN Specific disease- colorectal cancer; Age- 0 to 18 years, 19 to 40 years, 41 to 64 years, >=65 years; Gender- Both; Country- United Kingdom.                                                                             | 30738  | 32000  | Tappenden et al., 2013 (358) |
| Intense followup VERSUS Relaxed followup IN Specific disease- colorectal cancer; Age- 0 to 18 years, 19 to 40 years, 41 to 64 years, >=65 years; Gender- Both; Country- United Kingdom.                                                                                     | 24949  | 26000  | Tappenden et al., 2013 (358) |
| No CT scan VERSUS Standard/Usual Care- CT scan IN Specific disease- colorectal cancer; Age- 0 to 18 years, 19 to 40 years, 41 to 64 years, >=65 years; Gender- Both; Country- United Kingdom.                                                                               | 2363   | 2500   | Tappenden et al., 2013 (358) |
| Methylated Septin 9 DNA plasma 2-well assay VERSUS Natural history IN Healthy; Age- 41 to 64 years, >=65 years; Gender- Both; Country- United States.                                                                                                                       | 11500  | 12000  | Ladabaum et al., 2013 (359)  |

**Appendix**  
**Cost-Utility Analysis of Cancer Prevention, Treatment, and Control: A Systematic Review**  
**Winn et al.**

|                                                                                                                                                                               |        |        |                             |
|-------------------------------------------------------------------------------------------------------------------------------------------------------------------------------|--------|--------|-----------------------------|
| Methylated Septin 9 DNA plasma 3-well assay VERSUS Natural history IN Healthy; Age- 41 to 64 years, >=65 years; Gender- Both; Country- United States.                         | 8400   | 9100   | Ladabaum et al., 2013 (359) |
| Simgoidoscopy VERSUS Fecal occult blood testing IN Healthy; Age- 41 to 64 years, >=65 years; Gender- Both; Country- United States.                                            | 105000 | 110000 | Ladabaum et al., 2013 (359) |
| Colonoscopy VERSUS Natural history/no screening IN Healthy; Age- 41 to 64 years, >=65 years; Gender- Both; Country- United States.                                            | 2915   | 3200   | Ladabaum et al., 2013 (359) |
| Colonoscopy VERSUS Fecal occult blood testing IN Healthy; Age- 41 to 64 years, >=65 years; Gender- Both; Country- United States.                                              | 67300  | 73000  | Ladabaum et al., 2013 (359) |
| Colonoscopy VERSUS Sigmoidoscopy IN Healthy; Age- 41 to 64 years, >=65 years; Gender- Both; Country- United States.                                                           | 56800  | 62000  | Ladabaum et al., 2013 (359) |
| Combination sigmoidoscopy/fecal occult blood testing VERSUS Natural history/no screening IN Healthy; Age- 41 to 64 years, >=65 years; Gender- Both; Country- United States.   | 708    | 770    | Ladabaum et al., 2013 (359) |
| Combination sigmoidoscopy/fecal occult blood testing VERSUS Fecal occult blood testing IN Healthy; Age- 41 to 64 years, >=65 years; Gender- Both; Country- United States.     | 36500  | 40000  | Ladabaum et al., 2013 (359) |
| Combination sigmoidoscopy/fecal immunochemical testing VERSUS sigmoidoscopy IN Healthy; Age- 41 to 64 years, >=65 years; Gender- Both; Country- United States.                | 23600  | 26000  | Ladabaum et al., 2013 (359) |
| Combination sigmoidoscopy/fecal occult blood testing VERSUS Fecal immunochemical testing IN Healthy; Age- 41 to 64 years, >=65 years; Gender- Both; Country- United States.   | 258000 | 280000 | Ladabaum et al., 2013 (359) |
| Combination sigmoidoscopy/fecal immunochemical testing VERSUS Natural history/no screening IN Healthy; Age- 41 to 64 years, >=65 years; Gender- Both; Country- United States. | 580    | 630    | Ladabaum et al., 2013 (359) |

**Appendix**  
**Cost-Utility Analysis of Cancer Prevention, Treatment, and Control: A Systematic Review**  
**Winn et al.**

|                                                                                                                                                                                                                                                                                              |          |                                   |                             |
|----------------------------------------------------------------------------------------------------------------------------------------------------------------------------------------------------------------------------------------------------------------------------------------------|----------|-----------------------------------|-----------------------------|
| Combination sigmoidoscopy/fecal immunochemical testing VERSUS Fecal occult blood testing IN Healthy; Age- 41 to 64 years, >=65 years; Gender- Both; Country- United States.                                                                                                                  | 31500    | 34000                             | Ladabaum et al., 2013 (359) |
| Combination sigmoidoscopy/fecal immunochemical testing VERSUS Sigmoidoscopy IN Healthy; Age- 41 to 64 years, >=65 years; Gender- Both; Country- United States.                                                                                                                               | 20000    | 22000                             | Ladabaum et al., 2013 (359) |
| Combination sigmoidoscopy/fecal immunochemical testing VERSUS Fecal immunochemical testing IN Healthy; Age- 41 to 64 years, >=65 years; Gender- Both; Country- United States.                                                                                                                | 130000   | 140000                            | Ladabaum et al., 2013 (359) |
| Combination sigmoidoscopy/fecal immunochemical testing VERSUS Combination sigmoidoscopy/fecal occult blood testing IN Healthy; Age- 41 to 64 years, >=65 years; Gender- Both; Country- United States.                                                                                        | 1429     | 1600                              | Ladabaum et al., 2013 (359) |
| Panitumumab + fluoropyrimidine-based chemotherapy (FBC) VERSUS Bevacizumab + fluoropyrimidine-based chemotherapy (FBC) IN Specific disease- colorectal cancer; Age- Adult; Gender- Both; Country- Canada.                                                                                    | -1222260 | Increases Costs, Decreases Health | Lawrence et al., 2013 (360) |
| Cetuximab + Fluoropyrimidine-based chemotherapy (FBC) VERSUS Bevacizumab + fluoropyrimidine-based chemotherapy (FBC) IN Specific disease- colorectal cancer; Age- Adult; Gender- Both; Country- Canada.                                                                                      | 3364416  | 3500000                           | Lawrence et al., 2013 (360) |
| Bevacizumab + fluoropyrimidine-based chemotherapy (FBC) VERSUS Fluoropyrimidine-based chemotherapy (FBC) IN Specific disease- colorectal cancer; Age- Adult; Gender- Both; Country- Canada.                                                                                                  | 133205   | 140000                            | Lawrence et al., 2013 (360) |
| Modified FOLFOX6 regimen VERSUS mFLOX regimen (20 mg/m <sup>2</sup> leucovorin (LV) and 500 mg/m <sup>2</sup> 5-fluorouracil (5-FU) and 85 mg/m <sup>2</sup> oxaliplatin) IN Specific disease- metastatic colorectal cancer; Age- 41 to 64 years, >=65 years; Gender- Both; Country- Brazil. | 66186    | 70000                             | Nebuloni et al., 2013 (361) |

## Esophageal Cancer

| Description                                                                                                                                                                                                                                                            | Original US\$/QALY | 2014US\$/QALY                     | Reference                     |
|------------------------------------------------------------------------------------------------------------------------------------------------------------------------------------------------------------------------------------------------------------------------|--------------------|-----------------------------------|-------------------------------|
| Endoscopic surveillance; esophagectomy for high-grade dysplasia VERSUS Endoscopic surveillance; esophagectomy for cancer IN 55-yo men with Barrett's esophagus                                                                                                         |                    | Cost-Saving                       | Provenzale et al., 1994 (362) |
| 5-yr. endoscopic surveillance; esophagectomy for high-grade dysplasia VERSUS No surveillance; esophagectomy for high grade dysplasia IN 55-yo men with Barrett's esophagus                                                                                             | 27400              | 50000                             | Provenzale et al., 1994 (362) |
| 4-yr. endoscopic surveillance; esophagectomy for high-grade dysplasia VERSUS 5-yr. endoscopic surveillance; esophagectomy for high-grade dysplasia IN 55-yo men with Barrett's esophagus                                                                               | 276700             | 500000                            | Provenzale et al., 1994 (362) |
| 1,2,3-yr. endoscopic surveillance; esophagectomy for high-grade dysplasia VERSUS 4-yr. endoscopic surveillance; esophagectomy for high-grade dysplasia IN 55-yo men with Barrett's esophagus                                                                           |                    | Increases Costs, Decreases Health | Provenzale et al., 1994 (362) |
| Surveillance every 1-5 years VERSUS No surveillance IN Barrett's esophagus patients                                                                                                                                                                                    | 98000              | 150000                            | Provenzale et al., 1999 (363) |
| Positron emission tomography (PET) and Endoscopic ultrasound with fine needle aspiration biopsy VERSUS Computed tomography (CT) scan and Endoscopic ultrasound with fine needle aspiration biopsy IN Patients with with local, regional, and distant esophageal cancer | 60544              | 83000                             | Wallace et al., 2002 (364)    |
| Dysplasia-guided surveillance VERSUS Observation only IN Caucasian men with a history of gastroesophageal reflux disease (GERD) - age 50                                                                                                                               | 14211              | 18000                             | Rubenstein et al., 2005 (365) |
| Biomarker-guided surveillance VERSUS Dysplasia-guided surveillance IN Caucasian men with a history of gastroesophageal reflux disease (GERD) - age 50                                                                                                                  | 1704               | 2200                              | Rubenstein et al., 2005 (365) |
| Dysplasia-guided oesophagectomy VERSUS Observation only IN Caucasian men with a history of gastroesophageal reflux disease (GERD) - age 50                                                                                                                             | 9055               | 12000                             | Rubenstein et al., 2005 (365) |
| Dysplasia-guided oesophagectomy VERSUS Biomarker- or dysplasia-guided surveillance IN Caucasian men with a history of gastroesophageal reflux disease (GERD) - age 50                                                                                                  |                    | Cost-Saving                       | Rubenstein et al., 2005 (365) |
| Covered self-expanding metal stents (SEMS) VERSUS Plastic stents IN                                                                                                                                                                                                    | -179798            | Cost-Saving                       | Rao et al.,                   |

**Appendix**  
**Cost-Utility Analysis of Cancer Prevention, Treatment, and Control: A Systematic Review**  
**Winn et al.**

|                                                                                                                                                                        |         |                                      |                            |
|------------------------------------------------------------------------------------------------------------------------------------------------------------------------|---------|--------------------------------------|----------------------------|
| United Kingdom patients with esophageal cancer                                                                                                                         |         |                                      | 2009 (366)                 |
| Covered self-expanding metal stents (SEMS) VERSUS Uncovered self-expanding metal stents (SEMS) IN United Kingdom patients with esophageal cancer                       | -559677 | Cost-Saving                          | Rao et al., 2009 (366)     |
| Ablation VERSUS Surveillance IN US patients older than 50 years of age diagnosed with Barrett's esophagus, low dysplasia                                               | 13000   | 14000                                | Inadomi et al., 2009 (367) |
| Ablation, radio frequency VERSUS Ablation, argon plasma coagulation IN US patients older than 50 years of age diagnosed with Barrett's esophagus, high grade dysplasia | 5839    | 6400                                 | Inadomi et al., 2009 (367) |
| Surveillance VERSUS Ablation without surveillance IN US patients older than 50 years of age diagnosed with Barrett's esophagus, no dysplasia                           | 16286   | 18000                                | Inadomi et al., 2009 (367) |
| Esophagectomy VERSUS Endoscopic therapy IN 65 year old men with early esophageal adenocarcinoma in Barrett's esophagus who receive EMR and radiofrequency ablation     | -35938  | Increases Costs,<br>Decreases Health | Pohl et al., 2009 (368)    |

### **Gastrointestinal and Hepatocellular Cancer**

| Description                                                                                                                                                                                                                 | Original US\$/QALY | 2014US\$/QALY | Reference                    |
|-----------------------------------------------------------------------------------------------------------------------------------------------------------------------------------------------------------------------------|--------------------|---------------|------------------------------|
| Primary chemotherapy with ELF or FLv regimen, with best supportive care VERSUS Best supportive care IN Patients with surgically non-curable gastric cancer with no previous chemotherapy or other primary tumors            | 25893              | 44000         | Glimelius et al., 1995 (369) |
| Primary chemotherapy with ELF or FLv regimen, with best supportive care VERSUS Best supportive care IN Patients with surgically non-curable pancreatic/biliary cancer with no previous chemotherapy or other primary tumors | 104782             | 180000        | Glimelius et al., 1995 (369) |
| Primary chemotherapy with ELF or FLv regimen, with best supportive care VERSUS Best supportive care IN Patients with surgically non-curable colorectal cancer with no previous chemotherapy or other primary tumors         | 13326              | 22000         | Glimelius et al., 1995 (369) |



**Appendix**  
**Cost-Utility Analysis of Cancer Prevention, Treatment, and Control: A Systematic Review**  
**Winn et al.**

|                                                                                                                                                                                                                                                                                                                                                  |        |                                            |                                    |
|--------------------------------------------------------------------------------------------------------------------------------------------------------------------------------------------------------------------------------------------------------------------------------------------------------------------------------------------------|--------|--------------------------------------------|------------------------------------|
| Primary chemotherapy with ELF or FLv regimen, with best supportive care<br>VERSUS Best supportive care IN Patients with surgically non-curable<br>gastric, pancreatic/biliary, or colorectal cancer with no previous<br>chemotherapy or other primary tumors                                                                                     | 27136  | 46000                                      | Glimelius<br>et al.,<br>1995 (369) |
| Living donor liver transplant VERSUS Cadaveric liver transplant IN living<br>liver donors and patients with early hepatocellular carcinoma saving 2<br>months on the wait list                                                                                                                                                                   | 168700 | 250000                                     | Sarasin et<br>al., 2001<br>(370)   |
| Living donor liver transplant VERSUS Cadaveric liver transplant IN living<br>liver donors and patients with early hepatocellular carcinoma saving 7<br>months on the wait list                                                                                                                                                                   | 50000  | 73000                                      | Sarasin et<br>al., 2001<br>(370)   |
| Living donor liver transplant VERSUS Cadaveric liver transplant IN living<br>liver donors and patients with early hepatocellular carcinoma saving 12<br>months on the wait list                                                                                                                                                                  | 36400  | 53000                                      | Sarasin et<br>al., 2001<br>(370)   |
| Screening with transabdominal ultrasound (US) and alfa-fetoprotein (AFP)<br>concentration measurement alternating at 6 month intervals VERSUS No<br>Screening IN Transplant-eligible patients with cirrhosis secondary to chronic<br>hepatitis C viral infection - age 50                                                                        | 26689  | 37000                                      | Arguedas<br>et al.,<br>2003 (371)  |
| Screening with alfa-fetoprotein (AFP) concentration measurement alone at 6<br>month intervals VERSUS Screening with transabdominal ultrasound (US)<br>and AFP alternating at 6 month intervals IN Transplant-eligible patients with<br>cirrhosis secondary to chronic hepatitis C viral infection - age 50                                       | -4083  | Increases<br>Costs,<br>Decreases<br>Health | Arguedas<br>et al.,<br>2003 (371)  |
| Screening with abdominal three phase CT and AFP (alfa-fetoprotein)<br>concentration measurement alternating at 6 month intervals VERSUS<br>Screening with transabdominal ultrasound (US) and AFP alternating at 6<br>month intervals IN Transplant-eligible patients with cirrhosis secondary to<br>chronic hepatitis C viral infection - age 50 | 16605  | 23000                                      | Arguedas<br>et al.,<br>2003 (371)  |
| Screening with abdominal three phase CT and AFP (alfa-fetoprotein)<br>concentration measurement alternating at 6 month intervals VERSUS No<br>Screening IN Transplant-eligible patients with cirrhosis secondary to chronic<br>hepatitis C viral infection - age 50                                                                              | 25232  | 35000                                      | Arguedas<br>et al.,<br>2003 (371)  |

**Appendix**  
**Cost-Utility Analysis of Cancer Prevention, Treatment, and Control: A Systematic Review**  
**Winn et al.**

|                                                                                                                                                                                                                                                                                                                                                  |        |        |                             |
|--------------------------------------------------------------------------------------------------------------------------------------------------------------------------------------------------------------------------------------------------------------------------------------------------------------------------------------------------|--------|--------|-----------------------------|
| Screening with abdominal magnetic resonance imaging (MRI) and AFP (alfa-fetoprotein) concentration measurement alternating at 6 month intervals VERSUS Screening with abdominal three phase CT and AFP alternating at 6 month intervals IN Transplant-eligible patients with cirrhosis secondary to chronic hepatitis C viral infection - age 50 | 118000 | 160000 | Arguedas et al., 2003 (371) |
| VERSUS IN 40 years old patients with chronic hepatitis C and compensated cirrhosis                                                                                                                                                                                                                                                               | 23043  | 30000  | Lin et al., 2004 (372)      |
| VERSUS IN 40 years old patients with chronic hepatitis C and compensated cirrhosis                                                                                                                                                                                                                                                               | 33083  | 43000  | Lin et al., 2004 (372)      |
| VERSUS IN 40 years old patients with chronic hepatitis C and compensated cirrhosis                                                                                                                                                                                                                                                               | 73789  | 95000  | Lin et al., 2004 (372)      |
| VERSUS IN 40 years old patients with chronic hepatitis C and compensated cirrhosis                                                                                                                                                                                                                                                               | 96727  | 120000 | Lin et al., 2004 (372)      |
| VERSUS IN 40 years old patients with chronic hepatitis C and compensated cirrhosis                                                                                                                                                                                                                                                               | 36429  | 47000  | Lin et al., 2004 (372)      |
| VERSUS IN 40 years old patients with chronic hepatitis C and compensated cirrhosis                                                                                                                                                                                                                                                               | 51750  | 67000  | Lin et al., 2004 (372)      |
| Surveillance followed by resection VERSUS Natural history IN Patients with HCV related cirrhosis in the context of alternative hepatocellular carcinoma (HCC) treatment strategies                                                                                                                                                               | 21063  | 29000  | Patel et al., 2005 (373)    |
| Surveillance followed by cadaveric liver transplantation VERSUS Surveillance followed by resection IN Patients with HCV related cirrhosis in the context of alternative hepatocellular carcinoma (HCC) treatment strategies                                                                                                                      | 51400  | 71000  | Patel et al., 2005 (373)    |
| Surveillance followed by cadaveric liver transplantation VERSUS Natural history IN Patients with HCV related cirrhosis in the context of alternative hepatocellular carcinoma (HCC) treatment strategies                                                                                                                                         | 46700  | 64000  | Patel et al., 2005 (373)    |

**Appendix**  
**Cost-Utility Analysis of Cancer Prevention, Treatment, and Control: A Systematic Review**  
**Winn et al.**

|                                                                                                                                                                                                                                                                                       |         |         |                              |
|---------------------------------------------------------------------------------------------------------------------------------------------------------------------------------------------------------------------------------------------------------------------------------------|---------|---------|------------------------------|
| Surveillance followed by living donor liver transplantaion VERSUS Surveillance followed by cadaveric liver transplantation IN Patients with HCV realted cirrhosis in the context of alternative hepatocellular carcinoma (HCC) treatment strategies                                   | 58400   | 80000   | Patel et al., 2005 (373)     |
| Surveillance followed by living donor liver transplantation VERSUS Natural history IN Patients with HCV realted cirrhosis in the context of alternative hepatocellular carcinoma (HCC) treatment strategies                                                                           | 50400   | 69000   | Patel et al., 2005 (373)     |
| Imatinib mesylate treatment VERSUS No treatment IN Patients with unresectable GIST                                                                                                                                                                                                    | 38723   | 47000   | Huse et al., 2007 (374)      |
| Diagnosis with CT on neck, celiac lymph nodes, liver, and lungs VERSUS Diagnosis with CT of neck, celiac lymph, liver, and lung, and ultrasound of the supraclavicular lymph nodes (neck, CT) IN Patients with oesophageal or gastric cardia cancer                                   | 1050000 | 1300000 | van Vliet et al., 2007 (375) |
| CT of neck, celiac lymph, liver, and lung, and ultrasound of the supraclavicular lymph nodes and liver VERSUS CT of neck, celiac lymph, liver, and lung, and ultrasound of the supraclavicular lymph nodes IN Patients with Oesophageal or gastric cardia cancer                      | 94700   | 110000  | van Vliet et al., 2007 (375) |
| CT of neck, celiac lymph, liver, and lung; Chest X-Ray of Lung, and ultrasound of the supraclavicular lymph nodes and liver VERSUS CT of neck, celiac lymph, liver, and lung, and ultrasound of the supraclavicular lymph nodes IN Patients with Oesophageal or gastric cardia cancer | 100000  | 120000  | van Vliet et al., 2007 (375) |
| Surgery VERSUS CT of neck, celiac lymph, liver, and lung, and ultrasound of the supraclavicular lymph nodes IN Patients with Oesophageal or gastric cardia cancer                                                                                                                     | 365300  | 440000  | van Vliet et al., 2007 (375) |
| VERSUS IN Patients with newly diagnosed hepatic malignancy                                                                                                                                                                                                                            | 554     | 740     | McKay et al., 2007 (376)     |
| VERSUS IN Patients with newly diagnosed hepatic malignancy                                                                                                                                                                                                                            | 4504    | 6000    | McKay et al., 2007 (376)     |
| VERSUS IN Patients with hepatic malignancy                                                                                                                                                                                                                                            | 19723   | 26000   | McKay et                     |

**Appendix**  
**Cost-Utility Analysis of Cancer Prevention, Treatment, and Control: A Systematic Review**  
**Winn et al.**

|                                                                                                                                                                                                                                                                                         |        |        |                                     |
|-----------------------------------------------------------------------------------------------------------------------------------------------------------------------------------------------------------------------------------------------------------------------------------------|--------|--------|-------------------------------------|
|                                                                                                                                                                                                                                                                                         |        |        | al., 2007<br>(376)                  |
| Surveillance of hepatocellular carcinoma with ultrasonography every 6 months (no transplantation assumed) VERSUS No systemic surveillance of hepatocellular carcinoma IN 45 year old patients with Child-Pugh class A cirrhosis                                                         | 29400  | 35000  | Nouso et al., 2008<br>(377)         |
| Surveillance of hepatocellular carcinoma with ultrasonography every 6 months (with transplantation) VERSUS No systemic surveillance of hepatocellular carcinoma IN 45 year old patients with Child-Pugh class A cirrhosis                                                               | 59900  | 70000  | Nouso et al., 2008<br>(377)         |
| Serology screening for Helicobacter pylori VERSUS No screening for gastric cancer or Helicobacter pylori IN Singaporean Chinese at 40 years of age, prevalence of gastric cancer = 4.2 per 100,000                                                                                      | 25881  | 30000  | Xie et al., 2008 (378)              |
| 13C-urea breath test (UBT) for Helicobacter pylori VERSUS Serology screening for Helicobacter pylori IN Singaporean Chinese at 40 years of age, prevalence of gastric cancer = 4.2 per 100,000                                                                                          | 471746 | 550000 | Xie et al., 2008 (378)              |
| Sunitinib VERSUS Best supportive care IN Canadian patients with gastrointestinal stromal tumor who are intolerant or resistant to imatinib mesylate (Glivec)                                                                                                                            | 65980  | 80000  | Chabot et al., 2008<br>(379)        |
| 6--months alpha-foetoprotein triage surveillance VERSUS 6-months ultrasound surveillance IN Patients with compensated cirrhosis aged 70 years or less with no pre-existing medical condition that might preclude treatment with liver transplantation or hepatic resection              | 107823 | 140000 | Thompson Coon et al., 2008<br>(380) |
| 6--months alpha-foetoprotein triage surveillance VERSUS Annual alpha-foetoprotein triage surveillance IN Patients with compensated cirrhosis aged 70 years or less with no pre-existing medical condition that might preclude treatment with liver transplantation or hepatic resection | 50774  | 64000  | Thompson Coon et al., 2008<br>(380) |

**Appendix**  
**Cost-Utility Analysis of Cancer Prevention, Treatment, and Control: A Systematic Review**  
**Winn et al.**

|                                                                                                                                                                                                                                                        |        |             |                                  |
|--------------------------------------------------------------------------------------------------------------------------------------------------------------------------------------------------------------------------------------------------------|--------|-------------|----------------------------------|
| Annual alpha foetoprotein triage surveillance VERSUS No surveillance IN Patients with compensated cirrhosis aged 70 years or less with no pre-existing medical condition that might preclude treatment with liver transplantation or hepatic resection | 37943  | 48000       | Thompson Coon et al., 2008 (380) |
| Single serology screening using enzyme-linked immunosorbent assay (ELISA) VERSUS None IN All Singapore Chinese males aged from 35 to 44                                                                                                                | 13571  | 16000       | Xie et al., 2008 (381)           |
| C-Urea breath test (UBT) VERSUS None IN All Singapore Chinese males aged from 35 to 44                                                                                                                                                                 | 32525  | 38000       | Xie et al., 2008 (381)           |
| C-Urea breath test (UBT) VERSUS Single serology screening using enzyme-linked immunosorbent assay (ELISA) IN All Singapore Chinese males aged from 35 to 44                                                                                            | 390337 | 460000      | Xie et al., 2008 (381)           |
| Annual ultrasound surveillance VERSUS No surveillance IN United States patients with cirrhosis at high risk for hepatocellular carcinoma (HCC), over 50 years of age                                                                                   | 21200  | 27000       | Andersson et al., 2008 (382)     |
| Semi-annual ultrasound surveillance VERSUS Annual ultrasound surveillance IN United States patients with cirrhosis at high risk for hepatocellular carcinoma (HCC), over 50 years of age                                                               | 30700  | 38000       | Andersson et al., 2008 (382)     |
| Semiannual alpha-fetoprotein (AFP) and ultrasound surveillance (US) VERSUS Semi-annual ultrasound surveillance (US) IN United States patients with cirrhosis at high risk for hepatocellular carcinoma (HCC), over 50 years of age                     | 73500  | 92000       | Andersson et al., 2008 (382)     |
| Semi-annual CT scan VERSUS Semi-annual alpha-fetoprotein (AFP) and ultrasound surveillance (US) IN United States patients with cirrhosis at high risk for hepatocellular carcinoma (HCC), over 50 years of age                                         | 281650 | 350000      | Andersson et al., 2008 (382)     |
| Semi-annual ultrasound surveillance VERSUS Annual CT scan IN United States patients with cirrhosis at high risk for hepatocellular carcinoma (HCC), over 50 years of age                                                                               | -45375 | Cost-Saving | Andersson et al., 2008 (382)     |

**Appendix**  
**Cost-Utility Analysis of Cancer Prevention, Treatment, and Control: A Systematic Review**  
**Winn et al.**

|                                                                                                                                                                                                                                       |         |             |                              |
|---------------------------------------------------------------------------------------------------------------------------------------------------------------------------------------------------------------------------------------|---------|-------------|------------------------------|
| Semi-annual ultrasound surveillance VERSUS Annual MRI IN United States patients with cirrhosis at high risk for hepatocellular carcinoma (HCC), over 50 years of age                                                                  | -285267 | Cost-Saving | Andersson et al., 2008 (382) |
| Sunitinib (50 mg/day, 4 weeks on and two weeks off) VERSUS Best supportive care IN Spanish patients with metastatic and/or unresectable gastrointestinal stroma tumours (GIST) after progression or intolerance with imatinib         | 67305   | 77000       | Paz-Ares et al., 2008 (383)  |
| Postoperative chemoradiotherapy VERSUS No additional treatment IN Patients with surgically resected stage IB to IV (MO) gastric adenocarcinoma                                                                                        | 38400   | 44000       | Wang et al., 2008 (384)      |
| Hepatocellular carcinoma prevention VERSUS Current practice IN Asian born Australians at risk for hepatocellular cancer, aged 35 years or above                                                                                       | 9762    | 11000       | Robotin et al., 2009 (385)   |
| Hepatocellular carcinoma prevention VERSUS Hepatocellular carcinoma surveillance IN Asian born Australians at risk for hepatocellular cancer, aged 35 years or above                                                                  | 5073    | 6000        | Robotin et al., 2009 (385)   |
| Hepatocellular carcinoma surveillance VERSUS Current practice IN Asian born Australians at risk for hepatocellular cancer, aged 35 years or above                                                                                     | 302536  | 360000      | Robotin et al., 2009 (385)   |
| Stool antigen test (SAT) for the detection of Helicobacter pylori VERSUS No screening IN Male Canadians aged 35 years                                                                                                                 | 28183   | 31000       | Xie et al., 2009 (386)       |
| 13C-urea breath test(UBT) for the detection of Helicobacter pylori VERSUS No screening IN Male Canadians aged 35 years                                                                                                                | 47583   | 52000       | Xie et al., 2009 (386)       |
| 13C-urea breath test(UBT) for the detection of Helicobacter pylori VERSUS Stool antigen test (SAT) for the detection of Helicobacter pylori IN Hypothetical cohort male 10,000 Canadians aged 35 years, without symptoms of infection | 336404  | 370000      | Xie et al., 2009 (386)       |
| Serology test by enzyme-linked immunosorbent assay (ELISA) for the detection of Helicobacter pylori VERSUS No screening IN Male Canadians aged 35 years                                                                               | 31266   | 34000       | Xie et al., 2009 (386)       |

**Appendix**  
**Cost-Utility Analysis of Cancer Prevention, Treatment, and Control: A Systematic Review**  
**Winn et al.**

|                                                                                                                                                                                                                         |        |        |                               |
|-------------------------------------------------------------------------------------------------------------------------------------------------------------------------------------------------------------------------|--------|--------|-------------------------------|
| Pancreaticoduodenectomy at stage III VERSUS Pancreaticoduodenectomy at cancer IN United States patients with familial adenomatous polyposis                                                                             | 49091  | 56000  | Greenblatt et al., 2009 (387) |
| Pancreaticoduodenectomy at stage IV VERSUS Pancreaticoduodenectomy at cancer IN United States patients with familial adenomatous polyposis                                                                              | 3200   | 3700   | Greenblatt et al., 2009 (387) |
| Sorafenib as neoadjuvant therapy before liver transplant VERSUS No bridging therapy in the first 6 months IN Italian patients with hepatocellular carcinoma on the waiting list for liver transplantation               | 197    | 220    | Vitale et al., 2010 (388)     |
| A two-stage screening, mass screening campaign and subsequent continuing surveillance for hepatocellular carcinoma (HCC) VERSUS Opportunistic screening alone IN All Taiwanese individuals born before 1984             | 14014  | 21000  | Shih et al., 2010 (389)       |
| Endoscopic surveillance of gastric ulcers VERSUS No Surveillance IN American females aged 60 years old or older, diagnosed with presumed-benign gastric ulcers, based on appearance and negative biopsy results         | 113100 | 130000 | Yeh et al., 2010 (390)        |
| Endoscopic surveillance of gastric ulcers VERSUS No Surveillance IN American males aged 60 years old or older, diagnosed with presumed-benign gastric ulcers, based on appearance and negative biopsy results           | 146700 | 170000 | Yeh et al., 2010 (390)        |
| Sunitinib maleate VERSUS Interferon-alfa IN Adults with confirmed metastatic renal cell carcinoma of clear cell histology who had not received previous systemic therapy for RCC                                        | 134994 | 150000 | Chabot et al., 2010 (391)     |
| Endoscopic mucosal resection (EMR) with surveillance every 5 years VERSUS Endoscopic mucosal resection (EMR) with surveillance every 10 years IN US men aged 50 years old and older diagnosed with intestinal dysplasia | 20900  | 24000  | Yeh et al., 2010 (392)        |

**Appendix**  
**Cost-Utility Analysis of Cancer Prevention, Treatment, and Control: A Systematic Review**  
**Winn et al.**

|                                                                                                                                                                                                                                                                                                               |          |             |                                   |
|---------------------------------------------------------------------------------------------------------------------------------------------------------------------------------------------------------------------------------------------------------------------------------------------------------------|----------|-------------|-----------------------------------|
| Endoscopic mucosal resection (EMR) with surveillance every 1 years<br>VERSUS Endoscopic mucosal resection (EMR) with surveillance every 5<br>years IN US men aged 50 years old and older diagnosed with intestinal<br>dysplasia                                                                               | 39800    | 45000       | Yeh et al.,<br>2010 (392)         |
| Endoscopic mucosal resection (EMR) with surveillance every 1 year and<br>post-treatment surveillance every 10 years VERSUS Endoscopic mucosal<br>resection (EMR) with surveillance every 1 year IN US men aged 50 years<br>old and older diagnosed with intestinal dysplasia                                  | 1048000  | 1200000     | Yeh et al.,<br>2010 (392)         |
| Endoscopic mucosal resection (EMR) with surveillance every 10 years<br>VERSUS No treatment or surveillance IN US men aged 50 years old and<br>older diagnosed with intestinal metaplasia                                                                                                                      | 544500   | 620000      | Yeh et al.,<br>2010 (392)         |
| Endoscopic mucosal resection (EMR) with surveillance every 10 years and<br>post-treatment surveillance every 10 years VERSUS Endoscopic mucosal<br>resection (EMR) with surveillance every 10 years IN US men aged 50 years<br>old and older diagnosed with intestinal metaplasia                             | 25930000 | 30000000    | Yeh et al.,<br>2010 (392)         |
| Endoscopic mucosal resection (EMR) with surveillance every 10 years<br>VERSUS No treatment or surveillance IN US men aged 50 years old and<br>older diagnosed with intestinal dysplasia                                                                                                                       | 18600    | 21000       | Yeh et al.,<br>2010 (392)         |
| Zoledronic acid (ZOL) (4 or 8 mg) VERSUS Placebo IN Renal cell carcinoma<br>patients (median age 65) with bone metastasis in France                                                                                                                                                                           | -12794   | Cost-Saving | Botteman<br>et al.,<br>2010 (393) |
| Zoledronic acid (ZOL) (4 or 8 mg) VERSUS Placebo IN Renal cell carcinoma<br>patients (median age 65) with bone metastasis in UK                                                                                                                                                                               | -6722    | Cost-Saving | Botteman<br>et al.,<br>2010 (393) |
| Zoledronic acid (ZOL) (4 or 8 mg) VERSUS Placebo IN Renal cell carcinoma<br>patients (median age 65) with bone metastasis in Germany                                                                                                                                                                          | -11522   | Cost-Saving | Botteman<br>et al.,<br>2010 (393) |
| Sunitinib (50 mg/day, 6-week cycles, schedule 4/2) VERSUS Best<br>supportive Care, diagnostic test and palliative management IN Cytokine-<br>refractory metastatic renal cell carcinoma (mRCC) patients who were<br>intolerant-to or experienced disease progression with IL-2 or interferon alfa<br>in Spain | 46885    | 54000       | Paz-Ares<br>et al.,<br>2010 (394) |



**Appendix**  
**Cost-Utility Analysis of Cancer Prevention, Treatment, and Control: A Systematic Review**  
**Winn et al.**

|                                                                                                                                                                                                                                                                                              |        |             |                            |
|----------------------------------------------------------------------------------------------------------------------------------------------------------------------------------------------------------------------------------------------------------------------------------------------|--------|-------------|----------------------------|
| Immediate laparoscopic partial nephrectomy (LPN) VERSUS Observation IN US patients aged 65 years with an asymptomatic unilateral small renal mass with normal renal function and an unremarkable contralateral kidney.                                                                       | 36645  | 40000       | Chang et al., 2011 (395)   |
| Upper endoscopy screening with endoscopic surveillance of Barrett's esophagus VERSUS None or surveillance IN US patients aged 50 years undergoing colonoscopy for colorectal cancer screening                                                                                                | 95559  | 110000      | Gupta et al., 2011 (396)   |
| Upper endoscopy screening with endoscopic surveillance of Barrett's esophagus followed by endoscopic eradication therapy (EET) VERSUS None or surveillance IN US patients aged 50 years undergoing colonoscopy for colorectal cancer screening                                               | 79882  | 88000       | Gupta et al., 2011 (396)   |
| Upper endoscopy screening without endoscopic surveillance of Barrett's esophagus VERSUS None or surveillance IN US patients aged 50 years undergoing colonoscopy for colorectal cancer screening                                                                                             | 115664 | 130000      | Gupta et al., 2011 (396)   |
| Chemotherapy + adjuvant trastuzumab VERSUS Chemotherapy IN Patients with HER-2-positive (human epidermal growth factor 2) gastric cancer confirmed with immunohistochemical (ICH) 2+ fluorescence in situ hybridization (FISH)+ or ICD 3+ in Japan                                           | 103660 | 110000      | Shirowa et al., 2011 (397) |
| Chemotherapy + adjuvant trastuzumab VERSUS Chemotherapy IN Patients with HER-2-positive (human epidermal growth factor 2) gastric cancer confirmed with immunohistochemical 3+ in Japan                                                                                                      | 69297  | 75000       | Shirowa et al., 2011 (397) |
| Chemotherapy + adjuvant trastuzumab VERSUS Chemotherapy IN Patients with HER-2-positive (human epidermal growth factor 2) gastric cancer in Japan                                                                                                                                            | 139051 | 150000      | Shirowa et al., 2011 (397) |
| Primary orthotopic liver transplantation (POLT) for HCC within the Milan Criteria VERSUS Locoregional therapy (LRT) with radiofrequency ablation (RFA) followed by salvage orthotopic liver transplantation (SOLT) IN Patients aged 56 years with hepatocellular carcinoma (HCC), Child-Pugh | -25000 | Cost-Saving | Landman et al., 2011 (398) |

class A and hepatitis C virus (HCV)

|                                                                                                                                                                                                                                                                                                                                                                               |        |             |                            |
|-------------------------------------------------------------------------------------------------------------------------------------------------------------------------------------------------------------------------------------------------------------------------------------------------------------------------------------------------------------------------------|--------|-------------|----------------------------|
| Primary orthotopic liver transplantation (POLT) for HCC within the Milan Criteria VERSUS Hepatic resection (HR) followed by salvage orthotopic liver transplantation (SOLT) IN Patients aged 56 years with hepatocellular carcinoma (HCC), Child-Pugh class A and hepatitis C virus (HCV)                                                                                     | -4167  | Cost-Saving | Landman et al., 2011 (398) |
| Two stage screening for gastric cancer- consisting of epidemiological survey and serum pepsinogen (PG) test in the first stage and endoscopy and pathological examination in the second stage screening VERSUS None IN Population aged over 35 years with family history of gastric cancer and gastric illness or with evident gastric illness symptoms in northeastern China | 459    | 610         | Zhou et al., 2011 (399)    |
| Primary systemic chemotherapy followed by loco-regional cytoreductive surgery (CRS) and early post-operative intraperitoneal chemotherapy (EPIC) VERSUS Palliative systemic chemotherapy IN Patients with peritoneal carcinomatosis from gastric cancer                                                                                                                       | 175164 | 190000      | Hultman et al., 2012 (400) |
| Surgical management, resectioning of hepatic tumors and thrombi (hepatectomy and thrombectomy) and postoperative systemic chemotherapy VERSUS Transarterial chemoembolization (TACE) and systemic chemotherapy IN Patients with hepatocellular carcinoma (HCC) as well as thrombi in the inferior vena cava (IVC) and hepatic vein (HV)                                       | 9264   | 10000       | Liu et al., 2012 (401)     |
| Contrast-enhanced ultrasonography (CEUS) surveillance for hepatocellular carcinoma VERSUS None IN Hepatitis C virus (HCV)-related liver cirrhosis (LC) patients                                                                                                                                                                                                               | 18384  | 20000       | Tanaka et al., 2012 (402)  |
| Contrast-enhanced ultrasonography (CEUS) surveillance for hepatocellular carcinoma VERSUS Ultrasonography (US) surveillance IN Hepatitis C virus (HCV)-related liver cirrhosis (LC) patients                                                                                                                                                                                  | 24250  | 26000       | Tanaka et al., 2012 (402)  |
| Ultrasonography (US) surveillance for hepatocellular carcinoma VERSUS None IN Hepatitis C virus (HCV)-related liver cirrhosis (LC) patients                                                                                                                                                                                                                                   | 17296  | 19000       | Tanaka et al., 2012        |

**Appendix**  
**Cost-Utility Analysis of Cancer Prevention, Treatment, and Control: A Systematic Review**  
**Winn et al.**

|                                                                                                                                                                                                                                                       |       |       |                              |
|-------------------------------------------------------------------------------------------------------------------------------------------------------------------------------------------------------------------------------------------------------|-------|-------|------------------------------|
|                                                                                                                                                                                                                                                       |       |       | (402)                        |
| Semi-annual surveillance for hepatocellular carcinoma (HCC) VERSUS Annual surveillance IN Adult patients with decompensated cirrhosis in Italy                                                                                                        | 60292 | 65000 | Cucchetti et al., 2012 (403) |
| Semi-annual surveillance for hepatocellular carcinoma (HCC) VERSUS Annual surveillance IN Adult patients with compensated cirrhosis in Italy                                                                                                          | 31598 | 34000 | Cucchetti et al., 2012 (403) |
| Endoscopy screening strategy for gastric cancer annually in adults 40 to 80 years VERSUS Endoscopy screening strategy annually in men aged 50 to 80 years IN Healthy male adults aged 30 to 80 years in South Korea                                   | 20480 | 23000 | Chang et al., 2012 (404)     |
| Endoscopy screening strategy for gastric cancer annually in adults ages 30 to 80 years VERSUS Endoscopy screening strategy annually in men aged 40 to 80 years IN Healthy female adults aged 30 to 80 years in South Korea                            | 81294 | 89000 | Chang et al., 2012 (404)     |
| Endoscopy screening strategy for gastric cancer every two years in ages 50 to 80 years VERSUS None IN Healthy female adults aged 30 to 80 years in South Korea                                                                                        | 11378 | 13000 | Chang et al., 2012 (404)     |
| Endoscopy screening annually for gastric cancer in ages 50 to 80 years VERSUS Endoscopy screening strategy every two years in ages 50 to 80 years IN Healthy female adults aged 30 to 80 years in South Korea                                         | 12180 | 13000 | Chang et al., 2012 (404)     |
| Endoscopy screening annually for gastric cancer in ages 40 to 80 years VERSUS Endoscopy screening strategy annually in ages 50 to 80 years IN Healthy female adults aged 30 to 80 years in South Korea                                                | 22283 | 25000 | Chang et al., 2012 (404)     |
| Endoscopy screening annually for gastric cancer in ages 30 to 80 years VERSUS Endoscopy screening strategy annually in ages 40 to 80 years IN Healthy female adults aged 30 to 80 years in South Korea                                                | 50033 | 55000 | Chang et al., 2012 (404)     |
| Endoscopy screening strategy for gastric cancer annually in men age 50-80 years VERSUS None IN Healthy male adults aged 30 to 80 years in South Korea                                                                                                 | 4979  | 5500  | Chang et al., 2012 (404)     |
| 3 years of imatinib (400mg/day administered orally) VERSUS 1 year of imatinib (400mg/day administered orally) IN Specific disease- Surgically resected Kit+ gastrointestinal stromal tumors (GIST); Age- Adult; Gender- Both; Country- United States. | 62600 | 68000 | Sanon et al., 2013 (405)     |

**Appendix**  
**Cost-Utility Analysis of Cancer Prevention, Treatment, and Control: A Systematic Review**  
**Winn et al.**

|                                                                                                                                                                                                                                                                                                                                                                                     |       |       |                          |
|-------------------------------------------------------------------------------------------------------------------------------------------------------------------------------------------------------------------------------------------------------------------------------------------------------------------------------------------------------------------------------------|-------|-------|--------------------------|
| Treatment with full dose of sorafenib VERSUS Standard/Usual care- best supportive care IN Specific disease- Hepatocellular carcinoma (HCC); Age- >=65 years; Gender- Male; Country- Italy; Other- Caucasian patients aged 67 years with Barcelona Clinic Liver Cancer (BCLC) stage B & C HCC unfit or failed to respond to locoregional therapies with well compensated cirrhosis.  | 89168 | 92000 | Cammà et al., 2013 (406) |
| Treatment with full dose of sorafenib VERSUS Standard/Usual care- best supportive care IN Specific disease- Hepatocellular carcinoma (HCC); Age- >=65 years; Gender- Male; Country- Italy; Other- Caucasian patients aged 67 years with Barcelona Clinic Liver Cancer (BCLC) stage C HCC unfit or failed to respond to locoregional therapies with well compensated cirrhosis.      | 84290 | 87000 | Cammà et al., 2013 (406) |
| Treatment with dose-adjusted sorafenib VERSUS Standard/Usual care- best supportive care IN Specific disease- Hepatocellular carcinoma (HCC); Age- >=65 years; Gender- Male; Country- Italy; Other- Caucasian patients aged 67 years with Barcelona Clinic Liver Cancer (BCLC) stage B & C HCC unfit or failed to respond to locoregional therapies with well compensated cirrhosis. | 44406 | 46000 | Cammà et al., 2013 (406) |

**Appendix**  
**Cost-Utility Analysis of Cancer Prevention, Treatment, and Control: A Systematic Review**  
**Winn et al.**

|                                                                                                                                                                                                                                                                                                                                                                                 |        |                            |                              |
|---------------------------------------------------------------------------------------------------------------------------------------------------------------------------------------------------------------------------------------------------------------------------------------------------------------------------------------------------------------------------------|--------|----------------------------|------------------------------|
| Treatment with full dose of sorafenib VERSUS Standard/Usual care- best supportive care IN Specific disease- Hepatocellular carcinoma (HCC); Age- >=65 years; Gender- Male; Country- Italy; Other- Caucasian patients aged 67 years with Barcelona Clinic Liver Cancer (BCLC) stage B HCC unfit or failed to respond to locoregional therapies with well compensated cirrhosis.  | 73790  | 76000                      | Cammà et al., 2013 (406)     |
| Treatment with dose-adjusted sorafenib VERSUS Standard/Usual care- best supportive care IN Specific disease- Hepatocellular carcinoma (HCC); Age- >=65 years; Gender- Male; Country- Italy; Other- Caucasian patients aged 67 years with Barcelona Clinic Liver Cancer (BCLC) stage B HCC unfit or failed to respond to locoregional therapies with well compensated cirrhosis. | 70570  | 73000                      | Cammà et al., 2013 (406)     |
| Treatment with dose-adjusted sorafenib VERSUS Standard/Usual care- best supportive care IN Specific disease- Hepatocellular carcinoma (HCC); Age-; Gender- Male; Country- ; Other- Caucasian patients with Barcelona Clinic Liver Cancer (BCLC) stage C HCC unfit or failed to respond to locoregional therapies with well compensated cirrhosis.                               | 35896  | 37000                      | Cammà et al., 2013 (406)     |
| Hepatic resection VERSUS percutaneous radiofrequency ablation IN Specific disease- Early hepatocellular carcinoma; Age- Adult; Gender- Both; Country- Italy.                                                                                                                                                                                                                    | 18062  | 19000                      | Cucchetti et al., 2013 (407) |
| CSG chemotherapy and surgery group, 30 years VERSUS SOG surgery-only group IN Specific disease- Gastric Cancer; Age- Adult; Gender- Both; Country- China.                                                                                                                                                                                                                       | -15314 | Cost-Saving                | Chongqing et al., 2013 (408) |
| CSG chemotherapy and surgery group, 3 years VERSUS SOG surgery-only group IN Specific disease- Gastric Cancer; Age- Adult; Gender- Both; Country- China.                                                                                                                                                                                                                        | -39877 | Increases Costs, Decreases | Chongqing et al., 2013 (408) |

**Appendix**  
**Cost-Utility Analysis of Cancer Prevention, Treatment, and Control: A Systematic Review**  
**Winn et al.**

|                                                                                                                                                                                                                                       |        | Health                                     |                                    |
|---------------------------------------------------------------------------------------------------------------------------------------------------------------------------------------------------------------------------------------|--------|--------------------------------------------|------------------------------------|
| CSG chemotherapy and surgery group, 5 years VERSUS SOG surgery-only group IN Specific disease- Gastric Cancer; Age- Adult; Gender- Both; Country- China.                                                                              | -15259 | Increases<br>Costs,<br>Decreases<br>Health | Chongqing<br>et al.,<br>2013 (408) |
| CSG chemotherapy and surgery group, 10 years VERSUS SOG surgery-only group IN Specific disease- Gastric Cancer; Age- Adult; Gender- Both; Country- China.                                                                             | -44184 | Cost-Saving                                | Chongqing<br>et al.,<br>2013 (408) |
| 3-year adjuvant therapy with imatinib VERSUS 1-year adjuvant therapy with imatinib IN Specific disease- gastrointestinal stromal tumour; Age- Adult; Gender- Both; Country- Netherlands.                                              | 41569  | 44000                                      | Majer et<br>al., 2013<br>(409)     |
| Adjuvant S-1 therapy VERSUS Surgery alone IN Specific disease- gastric cancer; Age- 19 to 40 years, 41 to 64 years, >=65 years; Gender- Both; Country- Japan; Other- curatively resected.                                             | 3016   | 3400                                       | Hisashige<br>et al.,<br>2013 (410) |
| S-1 first-line postoperative adjuvant chemotherapy VERSUS XELOX first-line postoperative adjuvant chemotherapy (capecitabine and oxaliplatin) IN Specific disease- gastric cancer; Age- 41 to 64 years; Gender- Both; Country- China. | 58843  | 64000                                      | Tan et al.,<br>2013 (411)          |
| S-1 first-line postoperative adjuvant chemotherapy VERSUS surgery only IN Specific disease- gastric cancer; Age- 41 to 64 years; Gender- Both; Country- China.                                                                        | 4688   | 5100                                       | Tan et al.,<br>2013 (411)          |
| Surgery only VERSUS XELOX first-line postoperative adjuvant chemotherapy (capecitabine and oxaliplatin) IN Specific disease- gastric cancer; Age- 41 to 64 years; Gender- Both; Country- China.                                       | -17997 | Cost-Saving                                | Tan et al.,<br>2013 (411)          |
| 2-year surveillance, gastric cancer VERSUS None IN Healthy; Age- 41 to 64 years, >=65 years; Gender- Not Specified; Country- Singapore.                                                                                               | 25949  | 27000                                      | Zhou et<br>al., 2013<br>(412)      |
| Annual surveillance, gastric cancer VERSUS 2-year surveillance IN Healthy; Age- 41 to 64 years, >=65 years; Gender- Not Specified; Country- Singapore.                                                                                | 33050  | 34000                                      | Zhou et<br>al., 2013<br>(412)      |

**Appendix**  
**Cost-Utility Analysis of Cancer Prevention, Treatment, and Control: A Systematic Review**  
**Winn et al.**

|                                                                                                                                                                       |       |       |                         |
|-----------------------------------------------------------------------------------------------------------------------------------------------------------------------|-------|-------|-------------------------|
| 2-year screening, gastric cancer VERSUS annual surveillance IN Healthy; Age- 41 to 64 years, >=65 years; Gender- Not Specified; Country- Singapore.                   | 79673 | 82000 | Zhou et al., 2013 (412) |
| 2-year screening +annual surveillance, gastric cancer VERSUS 2-year screening IN Healthy; Age- 41 to 64 years, >=65 years; Gender- Not Specified; Country- Singapore. | 59565 | 61000 | Zhou et al., 2013 (412) |

### Hematologic Cancers

| Description                                                                                                                                                                                                                                                           | Original US\$/QALY | 2014US\$/QALY                        | Reference                       |
|-----------------------------------------------------------------------------------------------------------------------------------------------------------------------------------------------------------------------------------------------------------------------|--------------------|--------------------------------------|---------------------------------|
| IV immune globulin VERSUS no IV immune globulin IN chronic lymphocytic leukemia and hypogammaglobulinemia                                                                                                                                                             | 6000000            | 11000000                             | Weeks et al., 1991 (413)        |
| Bone marrow transplantation (BMT) VERSUS No BMT IN Patients receiving bone marrow transplantations for leukemia or SAA                                                                                                                                                | 7913               | 14000                                | Beard et al., 1991 (414)        |
| Autologous bone marrow transplantation VERSUS Five additional courses of CHOP chemotherapy IN Patients between 15 & 60 yo with non-Hodgkin's lymphoma of intermediate- or high-grade malignancy stages II-IV who were partial responders to initial 3 courses of CHOP | -73704             | Increases Costs,<br>Decreases Health | Uyl-de Groot et al., 1995 (415) |
| Interferon-alpha therapy VERSUS Hydroxyurea therapy IN 50-yo patients with chronic-phase, Ph-positive chronic myelogenous leukemia (CML)                                                                                                                              | 34800              | 54000                                | Kattan et al., 1996 (416)       |
| Current treatment for Hodgkin's disease VERSUS No treatment of Hodgkin's disease IN Patients with Hodgkin's disease undergoing treatment at a university hospital in Norway                                                                                           | 1800               | 2900                                 | Norum et al., 1996 (417)        |
| Adjuvant high-dose interferon (IFN) alfa-2b therapy VERSUS No IFN treatment IN Newly diagnosed resectable primary cutaneous melanoma patients                                                                                                                         | 15200              | 23000                                | Hillner et al., 1997 (418)      |

**Appendix**  
**Cost-Utility Analysis of Cancer Prevention, Treatment, and Control: A Systematic Review**  
**Winn et al.**

|                                                                                                                                                                                                                                       |       |        |                                |
|---------------------------------------------------------------------------------------------------------------------------------------------------------------------------------------------------------------------------------------|-------|--------|--------------------------------|
| Interferon alfa therapy VERSUS Conventional chemotherapy IN 45-50 yo patients diagnosed with chronic myelogenous leukemia in the early chronic phase                                                                                  | 89494 | 140000 | Liberato et al., 1997 (419)    |
| Interferon alpha 2 b with melphalan and prednisone VERSUS Conventional treatment IN Patients with multiple myeloma                                                                                                                    | 17374 | 27000  | Nord et al., 1997 (420)        |
| Allogeneic Bone Marrow Transplant VERSUS Alpha-interferon 5mil u/m2 3x per week IN Newly diagnosed CML (Chronic Myeloid Leukemia) patients transplanted within one year of diagnosis (base case 35yo)                                 | 51800 | 78000  | Lee et al., 1998 (421)         |
| Allogeneic Bone Marrow Transplant VERSUS Hydroxyurea 1000mg per day IN Newly diagnosed CML (Chronic Myeloid Leukemia) patients transplanted within one year of diagnosis (base case 35yo)                                             | 55500 | 84000  | Lee et al., 1998 (421)         |
| Cytarabine added to alpha-interferon VERSUS Interferon alpha alone IN Patients with early chronic phase chronic myelogenous leukemia                                                                                                  | 16900 | 24000  | Beck et al., 2001 (422)        |
| Cytarabine added to alpha-interferon VERSUS Chemotherapy (hydroxyurea) IN Patients with early chronic phase chronic myelogenous leukemia                                                                                              | 21450 | 30000  | Beck et al., 2001 (422)        |
| Alpha-interferon alone VERSUS Chemotherapy (hydroxyurea) IN Patients with early chronic phase chronic myelogenous leukemia                                                                                                            | 23700 | 34000  | Beck et al., 2001 (422)        |
| High dose melphalan and autologous stem cell support followed by interferon maintenance VERSUS Conventional treatment with melphalan and prednisone IN Patients less than 60 years of age with multiple myeloma                       | 27000 | 38000  | Gulbrandsen et al., 2001 (423) |
| Interferon alpha-2b added to chemotherapy VERSUS Chemotherapy alone IN Patients with high tumor burden follicular non-Hodgkins lymphoma                                                                                               | 16900 | 24000  | Wirt et al., 2001 (424)        |
| Laparotomy and tailored treatment VERSUS Mantle and para-aortic splenic radiation therapy IN 25 year old patients with early-stage Hodgkin's disease                                                                                  | 24100 | 34000  | Ng et al., 2001 (425)          |
| Treatment with imatinib mesilate (600mg daily) VERSUS Conventional therapies of combination chemotherapy (DAT) and palliative care IN Patients in advanced stages of chronic myeloid leukemia (CML) (presenting in accelerated phase) | 42231 | 56000  | Gordois et al., 2003 (426)     |



**Appendix**  
**Cost-Utility Analysis of Cancer Prevention, Treatment, and Control: A Systematic Review**  
**Winn et al.**

|                                                                                                                                                                                                                                                                                                                                                               |        |                                   |                                 |
|---------------------------------------------------------------------------------------------------------------------------------------------------------------------------------------------------------------------------------------------------------------------------------------------------------------------------------------------------------------|--------|-----------------------------------|---------------------------------|
| Treatment with imatinib mesilate (600mg daily) VERSUS Conventional therapies of combination chemotherapy (DAT) and palliative care IN Patients in advanced stages of chronic myeloid leukemia (CML) (presenting in blast crisis)                                                                                                                              | 60809  | 81000                             | Gordois et al., 2003 (426)      |
| Intensive chemotherapy followed by myeloblastive chemotherapy VERSUS Intensive chemotherapy alone IN Patients with previously untreated multiple myeloma and stage II or stage III A/B disease - age less than/equal to 65                                                                                                                                    | -49394 | Increases Costs, Decreases Health | van Agthoven et al., 2004 (427) |
| Imatinib as first line therapy and interferon alpha plus low-dose cytarabine (INF + LDAC) as second line therapy VERSUS Interferon alpha plus low-dose cytarabine (INF + LDAC) as first line therapy with hydroxy urea as second line therapy IN Patients with newly diagnosed chronic myeloid leukemia (CML) not eligible for allogenic stem cell transplant | 43300  | 57000                             | Reed et al., 2004 (428)         |
| Treatment with imatinib mesylate VERSUS Treatment with hydroxyurea IN Patients in chronic-phase chronic myeloid leukemia (CML) for whom first-line treatment with interferon-alfa failed                                                                                                                                                                      | 55380  | 74000                             | Warren et al., 2004 (429)       |
| Treatment with cyclophosphamide, doxorubicin, vincristine and prednisone (CHOP) plus rituximab VERSUS CHOP IN Patients with stage II, III or IV diffuse large B-cell lymphoma - age less than 60                                                                                                                                                              | 13219  | 17000                             | Groot et al., 2005 (430)        |
| Treatment with cyclophosphamide, doxorubicin, vincristine and prednisone (CHOP) plus rituximab VERSUS CHOP IN Patients with stage II, III or IV diffuse large B-cell lymphoma - age greater than 60                                                                                                                                                           | 16954  | 22000                             | Groot et al., 2005 (430)        |
| Cyclophosphamide, doxorubicin, vincristine, and prednisone (CHOP) plus rituximab VERSUS CHOP alone IN Patients with diffuse large B-cell non-Hodgkins lymphoma                                                                                                                                                                                                | 19297  | 25000                             | Hornberger et al., 2005 (431)   |
| Imatinib therapy VERSUS Interferon alpha IN Patients with chronic myeloid leukemia                                                                                                                                                                                                                                                                            | 39336  | 52000                             | Dalziel et al., 2005 (432)      |
| Imatinib therapy VERSUS Hydroxycarbamide IN Patients with chronic myeloid leukemia                                                                                                                                                                                                                                                                            | 130621 | 170000                            | Dalziel et al., 2005 (432)      |

**Appendix**  
**Cost-Utility Analysis of Cancer Prevention, Treatment, and Control: A Systematic Review**  
**Winn et al.**

|                                                                                                                                                                                                                                                                                                                          |         |                                   |                               |
|--------------------------------------------------------------------------------------------------------------------------------------------------------------------------------------------------------------------------------------------------------------------------------------------------------------------------|---------|-----------------------------------|-------------------------------|
| Rituximab plus cyclophosphamide, doxorubicin, vincristine, and prednisone (CHOP) chemotherapy VERSUS IN Patients that have untreated Diffused Large B-Cell Lymphoma (DLBCL) with stage II, III or IV disease and performance status of 0 to 2 - age 60-80                                                                | 13878   | 18000                             | Best et al., 2005 (433)       |
| VERSUS IN Hogkin's Disease Stage I-II patients in complete remission                                                                                                                                                                                                                                                     | -200000 | Increases Costs, Decreases Health | Guadagnolo et al., 2006 (434) |
| VERSUS IN Hogkin's Disease Stage III-IV patients in complete remission                                                                                                                                                                                                                                                   | 9042300 | 11000000                          | Guadagnolo et al., 2006 (434) |
| VERSUS IN Hogkin's Disease Stage III-IV patients in complete remission                                                                                                                                                                                                                                                   | -215000 | Increases Costs, Decreases Health | Guadagnolo et al., 2006 (434) |
| VERSUS IN Hodgkin's disease stage I-II patients in complete remission                                                                                                                                                                                                                                                    | -250000 | Increases Costs, Decreases Health | Guadagnolo et al., 2006 (434) |
| Third-line treatment with Alemtuzumab VERSUS Third-line treatment with fludarabine, cyclophosphamide and rituximab (FCR) IN Patients with chronic lymphocytic leukaemia (CLL) who were able to tolerate third-line treatment with either alemtuzumab or fludarabine, cyclophosphamide and rituximab (FCR) in New Zealand |         | Cost-Saving                       | Scott et al., 2007 (435)      |

**Appendix**  
**Cost-Utility Analysis of Cancer Prevention, Treatment, and Control: A Systematic Review**  
**Winn et al.**

|                                                                                                                                                                                                                                                                                                                                                                                                                                              |        |        |                               |
|----------------------------------------------------------------------------------------------------------------------------------------------------------------------------------------------------------------------------------------------------------------------------------------------------------------------------------------------------------------------------------------------------------------------------------------------|--------|--------|-------------------------------|
| Rituximab, cyclophosphamide, vincristine and prednisolone (R-CVP) VERSUS Cyclophosphamide, vincristine and prednisolone (CVP) IN US patients with advanced follicular lymphoma, aged 18 years or older, with Ann Arbor Stage III or IV follicular NHL with International Working Formulation (IWF) categories B, C, or D (WHO follicular grades 1 - 3), who have Eastern Cooperative Oncology Group (ECOG) performance score between 0 and 2 | 28565  | 34000  | Hornberger et al., 2008 (436) |
| Treatment with imatinib VERSUS Interferon alpha plus low-dose cytarabine IN Newly diagnosed patients with chronic-phase chronic myeloid leukemia                                                                                                                                                                                                                                                                                             | 57103  | 67000  | Reed et al., 2008 (437)       |
| rituximab maintenance VERSUS Observation only / (treat on relapse, unknown treatment upon relapse) IN Relapsed or refractory follicular lymphoma patients in remission after second line therapy in maintenance settings                                                                                                                                                                                                                     | 17253  | 20000  | Kasteng et al., 2008 (438)    |
| Extended adjuvant rituximab VERSUS Routine clinical observation IN US patients aged 65-70 in their second remission from follicular lymphoma (FL)                                                                                                                                                                                                                                                                                            | 19522  | 23000  | Hayslip et al., 2008 (439)    |
| High-dose chemotherapy with peripheral blood stem cell transplant VERSUS Standard chemotherapy regimen (cyclophosphamide, doxorubicin, vincristine and prednisone; CHOP) IN Patients aged 15-60 years with aggressive non-Hodgkin's lymphoma                                                                                                                                                                                                 | 105214 | 120000 | Fagnoni et al., 2009 (440)    |
| Pegfilgrastim VERSUS Filgrastim IN Patients with intermediate or high grade non-Hodgkin's lymphoma (NHL) receiving myelosuppressive chemotherapy with a febrile neutropenia (FN) risk of 20% or higher recovering from CHOP-21 regimen, scenario 3                                                                                                                                                                                           | 1677   | 2000   | Lyman et al., 2009 (441)      |

**Appendix**  
**Cost-Utility Analysis of Cancer Prevention, Treatment, and Control: A Systematic Review**  
**Winn et al.**

|                                                                                                                                                                                                                                                    |       |       |                              |
|----------------------------------------------------------------------------------------------------------------------------------------------------------------------------------------------------------------------------------------------------|-------|-------|------------------------------|
| Pegfilgrastim VERSUS Filgrastim IN Patients with intermediate or high grade non-Hodgkin's lymphoma (NHL) receiving myelosuppressive chemotherapy with a febrile neutropenia (FN) risk of 20% or higher recovering from CHOP-21 regimen, scenario 2 | 6190  | 7300  | Lyman et al., 2009 (441)     |
| Pentostatin VERSUS Cladribine IN UK patients with hairy cell leukemia (HCL)                                                                                                                                                                        | 4043  | 4400  | Guest et al., 2009 (442)     |
| Imatinib VERSUS Interferon-alpha IN Newly diagnosed chronic-phase chronic myeloid leukemia (CML-CP) patients in China                                                                                                                              | 9689  | 11000 | Chen et al., 2009 (443)      |
| Rituximab maintenance therapy after induction therapy VERSUS Current standard practice IN French patients with follicular lymphoma                                                                                                                 | 10966 | 13000 | Deconinck et al., 2010 (444) |
| Rituximab + cyclophosphamide, vincristine, and prednisolone VERSUS Cyclophosphamide, vincristine, and prednisolone IN Patients with Follicular Non-Hodgkin's Lymphoma in the UK.                                                                   | 15973 | 18000 | Ray et al., 2010 (445)       |
| Rituximab + cyclophosphamide, doxorubicin, vincristine, and prednisolone VERSUS Cyclophosphamide, doxorubicin, vincristine, and prednisolone IN Patients with Follicular Non-Hodgkin's Lymphoma in the UK.                                         | 19798 | 22000 | Ray et al., 2010 (445)       |
| Rituximab + cyclophosphamide, etoposide, doxorubicin, and prednisolone VERSUS Cyclophosphamide, etoposide, doxorubicin, and prednisolone IN Patients with Follicular Non-Hodgkin's Lymphoma in the UK.                                             | 15759 | 17000 | Ray et al., 2010 (445)       |
| Rituximab + mitoxantrone, chlorambucil, and prednisolone VERSUS Mitoxantrone, chlorambucil, and prednisolone IN Patients with Follicular Non-Hodgkin's Lymphoma in the UK.                                                                         | 13825 | 15000 | Ray et al., 2010 (445)       |
| Cyclophosphamide, doxorubicin, vincristine, prednisone, rituximab (CHOPR) VERSUS Cyclophosphamide, doxorubicin, vincristine, prednisone (CHOP) IN Canadian adults older than 60 years with a diagnosis of diffuse large B-cell lymphoma            | 5163  | 6100  | Johnston et al., 2010 (446)  |

**Appendix**  
**Cost-Utility Analysis of Cancer Prevention, Treatment, and Control: A Systematic Review**  
**Winn et al.**

|                                                                                                                                                                                                                                                |       |             |                              |
|------------------------------------------------------------------------------------------------------------------------------------------------------------------------------------------------------------------------------------------------|-------|-------------|------------------------------|
| Cyclophosphamide,k doxorubicin, vincristine, prednisone, rituximab (CHOPR) VERSUS Cyclophosphamide,k doxorubicin, vincristine, prednisone IN Canadian adults younger than 60 years with a diagnosis of diffuse large B-cell lymphoma           | 16886 | 20000       | Johnston et al., 2010 (446)  |
| Dasatinib 140 mg/day VERSUS High-dose imatinib 800 mg/day IN Swedish chronic phase chronic myeloid leukemia (CML) patients, resistant to lower doses of imatinib (less than or equal to 600 mg)                                                | 10131 | 11000       | Ghatnekar et al., 2010 (447) |
| Desferasirox 20mg/kg/day for 7 days/week VERSUS Non-proprietary desferrioxamine 40 mg/kg/day for 5 days/week IN Low and intermediate-1 risk patients with transfusion-dependent myelodysplastic syndrome (MDS) patients (average age 77)       | 38614 | 42000       | Tolley et al., 2010 (448)    |
| Desferasirox 20mg/kg/day for 7 days/week VERSUS Non-proprietary desferrioxamine 40 mg/kg/day for 5 days/week IN Low and intermediate-1 risk patients with transfusion-dependent myelodysplastic syndrome (MDS) 60 kg patients (average age 77) | 24229 | 27000       | Tolley et al., 2010 (448)    |
| Desferasirox 20mg/kg/day for 7 days/week VERSUS Non-proprietary desferrioxamine 30 mg/kg/day for 5 days/week IN Low and intermediate-1 risk patients with transfusion-dependent myelodysplastic syndrome (MDS) patients (average age 77)       | 52914 | 58000       | Tolley et al., 2010 (448)    |
| Desferasirox 20mg/kg/day for 7 days/week VERSUS Non-proprietary desferrioxamine 40 mg/kg/day for 5 days/week IN Low and intermediate-1 risk patients with transfusion-dependent myelodysplastic syndrome (MDS) 80 kg patients (average age 77) | 53001 | 58000       | Tolley et al., 2010 (448)    |
| Desferasirox 15mg/kg/day for 7 days/week VERSUS Non-proprietary desferrioxamine 40 mg/kg/day for 5 days/week IN Low and intermediate-1 risk patients with transfusion-dependent myelodysplastic syndrome (MDS) patients (average age 77)       | -862  | Cost-Saving | Tolley et al., 2010 (448)    |

**Appendix**  
**Cost-Utility Analysis of Cancer Prevention, Treatment, and Control: A Systematic Review**  
**Winn et al.**

|                                                                                                                                                                                                                                                                    |          |             |                               |
|--------------------------------------------------------------------------------------------------------------------------------------------------------------------------------------------------------------------------------------------------------------------|----------|-------------|-------------------------------|
| Desferasirox 20mg/kg/day for 7 days/week VERSUS Non-proprietary desferrioxamine 50 mg/kg/day for 5 days/week IN Low and intermediate-1 risk patients with transfusion-dependent myelodysplastic syndrome (MDS) patients (average age 77)                           | 24375    | 27000       | Tolley et al., 2010 (448)     |
| Desferasirox 20mg/kg/day for 7 days/week VERSUS Non-proprietary desferrioxamine 40 mg/kg/day for 3 days/week IN Low and intermediate-1 risk patients with transfusion-dependent myelodysplastic syndrome (MDS) patients (average age 77)                           | 61495    | 68000       | Tolley et al., 2010 (448)     |
| Desferasirox 20mg/kg/day for 7 days/week VERSUS Non-proprietary desferrioxamine 40 mg/kg/day for 7 days/week IN Low and intermediate-1 risk patients with transfusion-dependent myelodysplastic syndrome (MDS) patients (average age 77)                           | 15735    | 17000       | Tolley et al., 2010 (448)     |
| Desferasirox 25mg/kg/day for 7 days/week VERSUS Non-proprietary desferrioxamine 40 mg/kg/day for 5 days/week IN Low and intermediate-1 risk patients with transfusion-dependent myelodysplastic syndrome (MDS) patients (average age 77)                           | 78090    | 86000       | Tolley et al., 2010 (448)     |
| Bortezomib (BTZ) VERSUS Dexamethasone (DEX) IN Individuals in Sweden aged 18 or older, diagnosed with multiple myeloma who relapsed after first-line therapy or who have refractory disease and are eligible for secondline therapy                                | 118719   | 130000      | Hornberger et al., 2010 (449) |
| Bortezomib (BTZ) VERSUS Lenalidomide plus dexamethasone (LEN/DEX) IN Individuals in Sweden aged 18 or older, diagnosed with multiple myeloma who relapsed after first-line therapy or who have refractory disease and are eligible for secondline therapy          | -1889733 | Cost-Saving | Hornberger et al., 2010 (449) |
| RCHOP: Rituximab induction together with CHOP (cyclophosphamide, doxorubicin, vincristine, and prednisone) VERSUS CHOP (cyclophosphamide, doxorubicin, vincristine, and prednisone) IN Finnish patients with relapsed/refractory follicular non-Hodgkin's lymphoma | 17852    | 20000       | Ryynänen et al., 2010 (450)   |

**Appendix**  
**Cost-Utility Analysis of Cancer Prevention, Treatment, and Control: A Systematic Review**  
**Winn et al.**

|                                                                                                                                                                                                                                                                                                                      |        |             |                             |
|----------------------------------------------------------------------------------------------------------------------------------------------------------------------------------------------------------------------------------------------------------------------------------------------------------------------|--------|-------------|-----------------------------|
| R-CHOPR: Rituximab induction and maintenance with CHOP (cyclophosphamide, doxorubicin, vincristine, and prednisone) VERSUS RCHOP: Rituximab induction together with CHOP (cyclophosphamide, doxorubicin, vincristine, and prednisone) IN Finnish patients with relapsed/refractory follicular non-Hodgkin's lymphoma | 26723  | 29000       | Ryynänen et al., 2010 (450) |
| Extended haemodialysis using high cut-off dialysers (HCO-HD) VERSUS Standard haemodialysis IN Multiple myeloma patients with dialysis-dependent renal failure in the United Kingdom                                                                                                                                  | -12549 | Cost-Saving | Grima et al., 2010 (451)    |
| Decitabine (5-day dosing) VERSUS Best supportive care (RBC transfusions, deferoxamine, erythropoiesis-stimulating factors) IN Patients adults aged over 18 years with intermediate- and high-risk myelodysplastic syndromes                                                                                          | 5277   | 5800        | Pan et al., 2010 (452)      |
| Lenalidomide plus dexamethasone VERSUS Bortezomib IN Patients with relapsed refractory multiple myeloma (rrMM) in Norway                                                                                                                                                                                             | 40929  | 44000       | Müller et al., 2011 (453)   |
| Thalidomide, melphalan, and prednisolone or prednisone (MPT combination) VERSUS Melphalan+prednisolone or prednisone (MP) IN UK patients with multiple myeloma; considered inappropriate for high-dose chemotherapy with stem-cell transplantation                                                                   | 13301  | 15000       | Doss et al., 2011 (454)     |
| Thalidomide, cyclophosphamide and attenuated dexamethasone (CTDa combination) VERSUS Melphalan+prednisolone or prednisone (MP) IN UK patients with multiple myeloma; considered inappropriate for high-dose chemotherapy with stem-cell transplantation                                                              | 48071  | 53000       | Doss et al., 2011 (454)     |
| Bortezomib, melphalan, and prednisolone or prednisone (VMP) VERSUS Melphalan+prednisolone or prednisone (MP) IN UK patients with multiple myeloma; considered inappropriate for high-dose chemotherapy with stem-cell transplantation                                                                                | 27511  | 30000       | Doss et al., 2011 (454)     |
| Bortezomib, melphalan, and prednisolone or prednisone (VMP) VERSUS Thalidomide, melphalan, and prednisolone or prednisone (MPT combination) IN UK patients with multiple myeloma; considered inappropriate for high-dose chemotherapy with stem-cell transplantation                                                 | 463337 | 510000      | Doss et al., 2011 (454)     |

**Appendix**  
**Cost-Utility Analysis of Cancer Prevention, Treatment, and Control: A Systematic Review**  
**Winn et al.**

|                                                                                                                                                                                                                                                                                                                                                                                                      |         |             |                               |
|------------------------------------------------------------------------------------------------------------------------------------------------------------------------------------------------------------------------------------------------------------------------------------------------------------------------------------------------------------------------------------------------------|---------|-------------|-------------------------------|
| Dasatinib VERSUS Nilotinib IN UK patients with imatinib-resistant chronic phase chronic myeloid leukemia                                                                                                                                                                                                                                                                                             | 428794  | 470000      | Hoyle et al., 2011 (455)      |
| Nilotinib VERSUS High-dose imatinib IN UK patients with imatinib-resistant chronic phase chronic myeloid leukemia                                                                                                                                                                                                                                                                                    | -53819  | Cost-Saving | Hoyle et al., 2011 (455)      |
| Nilotinib VERSUS Interferon-alpha IN UK patients with imatinib-intolerant chronic phase chronic myeloid leukemia                                                                                                                                                                                                                                                                                     | 161631  | 180000      | Hoyle et al., 2011 (455)      |
| Dasatinib VERSUS Interferon-alpha IN UK patients with imatinib-intolerant chronic phase chronic myeloid leukemia                                                                                                                                                                                                                                                                                     | 127546  | 140000      | Hoyle et al., 2011 (455)      |
| Dasatinib VERSUS Nilotinib IN UK patients with imatinib-intolerant chronic phase chronic myeloid leukemia                                                                                                                                                                                                                                                                                            | 1661574 | 1800000     | Hoyle et al., 2011 (455)      |
| Dasatinib VERSUS High-dose imatinib IN UK patients with imatinib-resistant chronic phase chronic myeloid leukemia                                                                                                                                                                                                                                                                                    | 141256  | 150000      | Hoyle et al., 2011 (455)      |
| Rituximab in addition to fludarabine and cyclophosphamide VERSUS Fludarabine and cyclophosphamide IN Patients with chronic lymphocytic leukemia (CLL): societal perspective                                                                                                                                                                                                                          | 31513   | 34000       | Hornberger et al., 2012 (456) |
| Rituximab in addition to fludarabine and cyclophosphamide VERSUS Fludarabine and cyclophosphamide IN Patients with chronic lymphocytic leukemia (CLL): healthcare perspective                                                                                                                                                                                                                        | 23530   | 26000       | Hornberger et al., 2012 (456) |
| Zoledronic acid (4mg every 3-4 weeks) VERSUS Clodronic acid (1600mg daily) IN UK patients with newly diagnosed multiple Myeloma                                                                                                                                                                                                                                                                      | 8403    | 9100        | Delea et al., 2012 (457)      |
| Primary prophylaxis with granulocyte colony-stimulating factor (G-CSF) along with first cycle of chemotherapy VERSUS Secondary prophylaxis with granulocyte colony-stimulating factor (G-CSF) along with first cycle of chemotherapy after a neutropenic event IN Elderly patients aged >=65 years with newly diagnosed diffuse large B-cell lymphoma (DLBCL) receiving curative-intent chemotherapy | 680464  | 740000      | Chan et al., 2012 (458)       |



**Appendix**  
**Cost-Utility Analysis of Cancer Prevention, Treatment, and Control: A Systematic Review**  
**Winn et al.**

|                                                                                                                                                                                                                                                                                                                                                                                                                                                                                    |       |       |                          |
|------------------------------------------------------------------------------------------------------------------------------------------------------------------------------------------------------------------------------------------------------------------------------------------------------------------------------------------------------------------------------------------------------------------------------------------------------------------------------------|-------|-------|--------------------------|
| Rituximab following induction chemotherapy VERSUS Standard treatment IN UK patients with follicular non-Hodgkin's lymphoma receiving first line treatment                                                                                                                                                                                                                                                                                                                          | 15196 | 19000 | Pink et al., 2012 (459)  |
| Rituximab, fludarabine and cyclophosphamide (R-FC) VERSUS Rituximab, cyclophosphamide, vincristine and prednisolone (R-CVP) induction chemotherapies IN UK patients with follicular non-Hodgkin's lymphoma receiving first line treatment                                                                                                                                                                                                                                          | 36568 | 46000 | Pink et al., 2012 (459)  |
| Rituximab following induction chemotherapy VERSUS Standard treatment IN UK patients with follicular non-Hodgkin's lymphoma receiving maintenance therapy                                                                                                                                                                                                                                                                                                                           | 14153 | 18000 | Pink et al., 2012 (459)  |
| Autologous peripheral stem cell transplantation (ASCT) with high dose chemotherapy and granulocyte colony-stimulating factor (G-CSF) with plerixafor (GP) for stem cell mobilization VERSUS Autologous peripheral stem cell transplantation (ASCT) with high dose chemotherapy and granulocyte colony-stimulating factor (G-CSF) for stem cell mobilization IN US patients with relapsed non-Hodgkin lymphoma with diffuse large B-cell lymphoma undergoing stem cell mobilization | 14735 | 16000 | Kymes et al., 2012 (460) |
| Progression from RCHOPR to RCOPR/COP to best supportive care VERSUS Progression from RCHOP to RCHOP to best supportive care IN Patients with follicular non-hodgkins lymphoma                                                                                                                                                                                                                                                                                                      | 13233 | 14000 | Soini et al., 2012 (461) |
| Progression from RCHOPR to RCOPR/bendamustine to best supportive care VERSUS Progression from RCHOP to RCOPR/COP to best supportive care IN Patients with follicular non-hodgkins lymphoma                                                                                                                                                                                                                                                                                         | 12672 | 14000 | Soini et al., 2012 (461) |
| Progression from RCHOPR to RCOPR/COP to best supportive care VERSUS Progression from RCHOP to RCOPR/COP to best supportive care IN Patients with follicular non-hodgkins lymphoma                                                                                                                                                                                                                                                                                                  | 13077 | 14000 | Soini et al., 2012 (461) |
| Progression from RCHOP to RCOPR/bendamustine to best supportive care VERSUS Progression from RCHOP to RCOPR/COP to best supportive care IN Patients with follicular non-hodgkins lymphoma                                                                                                                                                                                                                                                                                          | 16080 | 17000 | Soini et al., 2012 (461) |
| Progression from RCHOPR to RCOPR/bendamustine to best supportive care VERSUS Progression from RCHOPR to RCOPR/COP to best supportive care IN Patients with follicular non-hodgkins lymphoma                                                                                                                                                                                                                                                                                        | 9770  | 11000 | Soini et al., 2012 (461) |

**Appendix**  
**Cost-Utility Analysis of Cancer Prevention, Treatment, and Control: A Systematic Review**  
**Winn et al.**

|                                                                                                                                                                                                                                                                |        |        |                               |
|----------------------------------------------------------------------------------------------------------------------------------------------------------------------------------------------------------------------------------------------------------------|--------|--------|-------------------------------|
| Lenalidomide plus dexamethasone (LEN/DEX) VERSUS Dexamethasone (DEX) IN Patients with multiple myeloma (MM) who have failed first-line therapy in England and Wales                                                                                            | 46550  | 51000  | Brown et al., 2012 (462)      |
| Maintenance rituximab therapy VERSUS Observation IN Patients aged 18 years or older with follicular non-Hodgkin lymphoma (f-NHL) after responding to first-line rituximab plus chemotherapy (R-chemo)                                                          | 34842  | 38000  | Hornberger et al., 2012 (463) |
| Bendamustine VERSUS Chlorambucil IN Patients with chronic lymphocytic leukemia unsuitable for treatment with fludarabine combination chemotherapy regimens in England and Wales                                                                                | 17317  | 19000  | Woods et al., 2012 (464)      |
| Alemtuzumab (treatment begins 7 months after diagnosis) VERSUS Conventional therapy (1 line) IN Patients with T-cell prolymphocytic leukemia (T-PLL) who had completed at least one prior conventional therapy and not suitable for stem cell transplantation  | 123117 | 130000 | Lu et al., 2012 (465)         |
| Alemtuzumab (treatment begins 3 months after diagnosis) VERSUS Conventional therapy (1 line) IN Patients with T-cell prolymphocytic leukemia (T-PLL) who had completed at least one prior conventional therapy and not suitable for stem cell transplantation  | 83316  | 86000  | Lu et al., 2012 (465)         |
| Alemtuzumab (treatment begins 7 months after diagnosis) VERSUS Conventional therapy (3 lines) IN Patients with T-cell prolymphocytic leukemia (T-PLL) who had completed at least one prior conventional therapy and not suitable for stem cell transplantation | 51776  | 53000  | Lu et al., 2012 (465)         |

**Appendix**  
**Cost-Utility Analysis of Cancer Prevention, Treatment, and Control: A Systematic Review**  
**Winn et al.**

|                                                                                                                                                                                                                                                                |         |         |                                |
|----------------------------------------------------------------------------------------------------------------------------------------------------------------------------------------------------------------------------------------------------------------|---------|---------|--------------------------------|
| Alemtuzumab (treatment begins 3 months after diagnosis) VERSUS conventional therapy (3 lines) IN Patients with T-cell prolymphocytic leukemia (T-PLL) who had completed at least one prior conventional therapy and not suitable for stem cell transplantation | 43929   | 45000   | Lu et al., 2012 (465)          |
| Bisphosphonate therapy with zoledronic acid (4 mg every 3-4 weeks) VERSUS Bisphosphonate therapy with clodronate (1600 mg daily) IN UK adult patients receiving first-line treatment for newly-diagnosed stages 1-3 multiple myeloma                           | 48404   | 53000   | Delea et al., 2012 (466)       |
| Lenalidomide-dexamethasone VERSUS Bortezomib IN Specific disease-relapsed refractory multiple myeloma; Age- Adult; Gender- Both; Country- Greece.                                                                                                              | 49208   | 51000   | Fragoulakis et al., 2013 (467) |
| Filgrastim VERSUS No primary prophylaxis IN Specific disease- Lymphoma Patients; Age- >=65 years, Adult; Gender- Both; Country- Canada.                                                                                                                        | 5800237 | 6000000 | Lathia et al., 2013 (468)      |
| Pegfilgrastim VERSUS Filgrastim IN Specific disease- Lymphoma Patients; Age- >=65 years, Adult; Gender- Both; Country- Canada.                                                                                                                                 | 2612909 | 2700000 | Lathia et al., 2013 (468)      |
| Autologous peripheral blood stem cell transplantation VERSUS Standard/Usual Care IN Specific disease- multiple myeloma; Age- 41 to 64 years, >=65 years; Gender- Both; Country- Italy.                                                                         | 63261   | 67000   | Corso et al., 2013 (469)       |
| Azacitidine VERSUS best supportive care IN Specific disease- high-risk myelodysplastic; Age- Adult; Gender- Not Specified; Country- Spain.                                                                                                                     | 50933   | 53000   | Crespo et al., 2013 (470)      |
| Azacitidine VERSUS low dose chemotherapy IN Specific disease- high-risk myelodysplastic; Age- Adult; Gender- Not Specified; Country- Spain.                                                                                                                    | 39259   | 40000   | Crespo et al., 2013 (470)      |
| Azacitidine VERSUS standard dose chemotherapy IN Specific disease- high-risk myelodysplastic; Age- Adult; Gender- Not Specified; Country- Spain.                                                                                                               | 30609   | 32000   | Crespo et al., 2013 (470)      |

**Appendix**  
**Cost-Utility Analysis of Cancer Prevention, Treatment, and Control: A Systematic Review**  
**Winn et al.**

|                                                                                                                                                                      |       |       |                           |
|----------------------------------------------------------------------------------------------------------------------------------------------------------------------|-------|-------|---------------------------|
| Azacitidine VERSUS Standard/Usual Care- Conventional care regimen IN Specific disease- high-risk myelodysplastic; Age- Adult; Gender- Not Specified; Country- Spain. | 44585 | 46000 | Crespo et al., 2013 (470) |
|----------------------------------------------------------------------------------------------------------------------------------------------------------------------|-------|-------|---------------------------|

## Kidney Cancer

| Description                                                                                                                                                                | Original US\$/QALY | 2014US\$/QALY | Reference                        |
|----------------------------------------------------------------------------------------------------------------------------------------------------------------------------|--------------------|---------------|----------------------------------|
| Sunitinib VERSUS Best supportive care, standard therapy: second-line therapy as prescribed by Finnish health standards IN Finnish metastatic renal cell carcinoma patients | 54398              | 66000         | Purmonen et al., 2008 (471)      |
| Nephron-sparing surgery (NSS) VERSUS Percutaneous radiofrequency ablation (RF) IN 65-year old men in the US with unilateral RCCs (renal cell carcinomas) 4 cm or smaller   | 1152529            | 1400000       | Pandharipande et al., 2008 (472) |
| Sunitinib malate , 6 week cycles therapy VERSUS Interleukin -2 IN United States patients with metastatic renal cell carcinoma                                              | -17205             | Cost-Saving   | Remák et al., 2008 (473)         |
| VERSUS Interferon alpha IN United States patients with metastatic renal cell carcinoma                                                                                     | 52593              | 62000         | Remák et al., 2008 (473)         |
| Temsirolimus VERSUS Interferon-alpha IN United Kingdom patients with advanced, poor prognosis renal cell carcinoma needing first line treatment                            | 175493             | 190000        | Hoyle et al., 2009 (474)         |
| Temsirolimus VERSUS Interferon-alpha IN United Kingdom patients with advanced, poor prognosis renal cell carcinoma needing first line treatment, no prior nephrectomy      | 137916             | 150000        | Hoyle et al., 2009 (474)         |

**Appendix**  
**Cost-Utility Analysis of Cancer Prevention, Treatment, and Control: A Systematic Review**  
**Winn et al.**

|                                                                                                                                                                                       |         |                                   |                                  |
|---------------------------------------------------------------------------------------------------------------------------------------------------------------------------------------|---------|-----------------------------------|----------------------------------|
| Temsirolimus VERSUS Interferon-alpha IN United Kingdom patients with advanced, poor prognosis clear cell renal cell carcinoma needing first line treatment                            | 279509  | 310000                            | Hoyle et al., 2009 (474)         |
| Temsirolimus VERSUS Interferon-alpha IN United Kingdom patients with advanced, poor prognosis renal cell carcinoma needing first line treatment, with prior nephrectomy               | 286985  | 320000                            | Hoyle et al., 2009 (474)         |
| Sorafenib VERSUS Best supportive care IN United Kingdom patients with advanced renal cell carcinoma needing second line treatment                                                     | 139824  | 150000                            | Hoyle et al., 2009 (475)         |
| Renal mass biopsy to triage patients to surgery or CT surveillance VERSUS Direct nephron-sparing surgery without biopsy IN US patients aged 65 years with small (< 4-cm) renal tumors | -315091 | Cost-Saving                       | Pandharipande et al., 2010 (476) |
| Sunitinib VERSUS Sorafenib IN US patients with metastatic renal cell carcinoma                                                                                                        | -79859  | Cost-Saving                       | Benedict et al., 2011 (477)      |
| Sunitinib VERSUS Bevacizumab+IFN-alpha IN Sweden patients with metastatic renal cell carcinoma                                                                                        | -297258 | Cost-Saving                       | Benedict et al., 2011 (477)      |
| Sunitinib VERSUS Bevacizumab IN US patients with metastatic renal cell carcinoma                                                                                                      | -418504 | Cost-Saving                       | Benedict et al., 2011 (477)      |
| Everolimus VERSUS Sorafenib IN Patients diagnosed with metastatic renal cell carcinoma failing first-line sunitinib treatment                                                         | 89160   | 97000                             | Casciano et al., 2011 (478)      |
| Immediate treatment VERSUS Percutaneous biopsy IN Healthy 60 year-old- men with diagnosis of small solid renal mass                                                                   | -4951   | Increases Costs, Decreases Health | Heilbrun et al., 2012 (479)      |
| Percutaneous biopsy VERSUS Active surveillance (AS) IN Healthy 60 year-old- men with diagnosis of small solid renal mass                                                              | 33840   | 37000                             | Heilbrun et al., 2012 (479)      |
| Treatment with sunitinib as first-line therapy VERSUS Sorafenib treatment IN Patients with metastatic renal carcinoma (mRCC)                                                          | -9736   | Cost-Saving                       | Calvo Aller et al., 2012 (480)   |

**Appendix**  
**Cost-Utility Analysis of Cancer Prevention, Treatment, and Control: A Systematic Review**  
**Winn et al.**

|                                                                                                                                                                                                                                                                                                                          |         |             |                                |
|--------------------------------------------------------------------------------------------------------------------------------------------------------------------------------------------------------------------------------------------------------------------------------------------------------------------------|---------|-------------|--------------------------------|
| Treatment with sunitinib as first-line therapy VERSUS Treatment with bevacizumab/interferon-alpha (BEV/IFN) IN Patients with metastatic renal carcinoma (mRCC)                                                                                                                                                           | -213678 | Cost-Saving | Calvo Aller et al., 2012 (480) |
| Bevacizumab plus interferon-alpha VERSUS Interleukin-2 IN Patients with metastatic renal cell carcinoma without sunitinib patient assistance program (SPAP) in China                                                                                                                                                     | 1021196 | 1100000     | Wu et al., 2012 (481)          |
| Sunitinib VERSUS Interleukin-2 IN Patients with metastatic renal cell carcinoma without sunitinib patient assistance program (SPAP) in China                                                                                                                                                                             | 220384  | 230000      | Wu et al., 2012 (481)          |
| Interleukin-2 plus interferon-alfa VERSUS Interleukin-2 IN Patients with metastatic renal cell carcinoma without sunitinib patient assistance program (SPAP) in China                                                                                                                                                    | 818149  | 860000      | Wu et al., 2012 (481)          |
| Interferon-alpha VERSUS Interleukin-2 IN Patients with metastatic renal cell carcinoma without sunitinib patient assistance program (SPAP) in China                                                                                                                                                                      | 177725  | 190000      | Wu et al., 2012 (481)          |
| Annual immunochemical faecal occult blood test (iFOBT) screening for colorectal cancer (CRC) starting at age 50 years VERSUS None IN Specific disease- chronic kidney disease (CKD); Age- 41 to 64 years, >=65 years; Gender- Not Specified; Country- Australia; Other- 50-70 years.                                     | 62489   | 68000       | Wong et al., 2013 (482)        |
| Annual immunochemical faecal occult blood test (iFOBT) screening for colorectal cancer (CRC) starting at age 50 years VERSUS None IN Specific disease- chronic kidney disease (CKD) & on kidney transplant waiting list; Age- 41 to 64 years, >=65 years; Gender- Not Specified; Country- Australia; Other- 50-70 years. | 112215  | 120000      | Wong et al., 2013 (482)        |
| Annual immunochemical faecal occult blood test (iFOBT) screening for colorectal cancer (CRC) starting at age 50 years VERSUS None IN Specific disease- chronic kidney disease (CKD) & kidney transplant; Age- 41 to 64 years, >=65 years; Gender- Not Specified; Country- Australia; Other- 50-70 years.                 | 41207   | 45000       | Wong et al., 2013 (482)        |

**Appendix**  
**Cost-Utility Analysis of Cancer Prevention, Treatment, and Control: A Systematic Review**  
**Winn et al.**

|                                                                                                                                                                                                                           |         |                                   |                            |
|---------------------------------------------------------------------------------------------------------------------------------------------------------------------------------------------------------------------------|---------|-----------------------------------|----------------------------|
| Sunitinib VERSUS Pazopanib IN Specific disease- advanced and/or metastatic renal cell carcinoma; Age- Unknown; Gender- Both; Country- United Kingdom.                                                                     | 2763    | 3000                              | Kilonzo et al., 2013 (483) |
| Interferon alpha (IFN-a) VERSUS Pazopanib IN Specific disease- advanced and/or metastatic renal cell carcinoma; Age- Unknown; Gender- Both; Country- United Kingdom.                                                      | 60092   | 65000                             | Kilonzo et al., 2013 (483) |
| Best supportive care (BSC) VERSUS Pazopanib IN Specific disease- advanced and/or metastatic renal cell carcinoma; Age- Unknown; Gender- Both; Country- United Kingdom.                                                    | 50787   | 55000                             | Kilonzo et al., 2013 (483) |
| Biopsy plus RFA (radiofrequency ablation) if needed VERSUS no biopsy, active surveillance plus cryoablation if needed IN Specific disease- Renal Mass; Age- Adult; Gender- Both; Country- Canada.                         | -25896  | Increases Costs, Decreases Health | Bhan et al., 2013 (484)    |
| No biopsy, immediate cryoablation VERSUS no biopsy, active surveillance plus cryoablation if needed IN Specific disease- Renal Mass; Age- Adult; Gender- Both; Country- Canada.                                           | -292391 | Increases Costs, Decreases Health | Bhan et al., 2013 (484)    |
| No biopsy, immediate RFA (radiofrequency ablation) VERSUS no biopsy, active surveillance plus cryoablation if needed IN Specific disease- Renal Mass; Age- Adult; Gender- Both; Country- Canada.                          | -24581  | Increases Costs, Decreases Health | Bhan et al., 2013 (484)    |
| No biopsy, active surveillance plus RFA (radiofrequency ablation) if needed VERSUS no biopsy, active surveillance plus cryoablation if needed IN Specific disease- Renal Mass; Age- Adult; Gender- Both; Country- Canada. | -14266  | Increases Costs, Decreases Health | Bhan et al., 2013 (484)    |
| Biopsy plus cryoablation if needed VERSUS no biopsy, active surveillance plus cryoablation if needed IN Specific disease- Renal Mass; Age- Adult; Gender- Both; Country- Canada.                                          | -167518 | Increases Costs, Decreases Health | Bhan et al., 2013 (484)    |

**Appendix**  
**Cost-Utility Analysis of Cancer Prevention, Treatment, and Control: A Systematic Review**  
**Winn et al.**

|                                                                                                                                            |        |        |                                  |
|--------------------------------------------------------------------------------------------------------------------------------------------|--------|--------|----------------------------------|
| Everolimus VERSUS best supportive care IN Specific disease-<br>MetastaticRenalCellCarcinoma; Age- Adult; Gender- Both; Country-<br>Serbia. | 115519 | 120000 | Mihajlovic et<br>al., 2013 (485) |
|--------------------------------------------------------------------------------------------------------------------------------------------|--------|--------|----------------------------------|

## Lung Cancer

| Description                                                                                                                                                                                                                                                                                   | Original<br>US\$/QALY | 2014US\$/QALY                              | Reference                        |
|-----------------------------------------------------------------------------------------------------------------------------------------------------------------------------------------------------------------------------------------------------------------------------------------------|-----------------------|--------------------------------------------|----------------------------------|
| Alternating CAV and VP-16/cisplatin chemotherapy VERSUS Standard CAV<br>chemotherapy at 3-week intervals IN Patients with extensive small cell lung<br>cancer (SCLC)                                                                                                                          | 3472                  | 7900                                       | Goodwin et<br>al., 1988<br>(486) |
| Routine preoperative brain CT with treatment based on results VERSUS<br>Thoracotomy with no preoperative brain CT IN Patients with potentially<br>resectable lung cancer with no preoperative evidence of presence of<br>extrathoracic metastases                                             | 69815                 | 120000                                     | Colice et al.,<br>1995 (487)     |
| Diagnostic testing strategy using thoracoscopy VERSUS Sequential testing<br>strategy, using sputa, fine needle aspiration, thoracoscopy IN 50-yo man with<br>a radiographically detected large (>3 cm), peripheral lung mass suspicious<br>for cancer                                         | -636500               | Increases<br>Costs,<br>Decreases<br>Health | Raab et al.,<br>1997 (488)       |
| Sequential testing strategy, using sputa, fine needle aspiration, expectant<br>management VERSUS No test IN 50-yo man with a radiographically detected<br>large (>3 cm), peripheral lung mass suspicious for cancer                                                                           | 19604                 | 30000                                      | Raab et al.,<br>1997 (488)       |
| Sequential testing strategy, using sputa, fine needle aspiration, thoracoscopy<br>VERSUS Sequential testing strategy, using sputa, fine needle aspiration,<br>expectant management IN 50-yo man with a radiographically detected large<br>(>3 cm), peripheral lung mass suspicious for cancer | 40092                 | 60000                                      | Raab et al.,<br>1997 (488)       |
| Sequential testing strategy, using fine needle aspiration, thoracoscopy<br>VERSUS Sequential testing strategy, using sputa, fine needle aspiration,<br>thoracoscopy IN 50-yo man with a radiographically detected large (>3 cm),<br>peripheral lung mass suspicious for cancer                |                       | Increases<br>Costs,<br>Decreases<br>Health | Raab et al.,<br>1997 (488)       |



**Appendix**  
**Cost-Utility Analysis of Cancer Prevention, Treatment, and Control: A Systematic Review**  
**Winn et al.**

|                                                                                                                                                                                                                                                      |          |                                   |                              |
|------------------------------------------------------------------------------------------------------------------------------------------------------------------------------------------------------------------------------------------------------|----------|-----------------------------------|------------------------------|
| Sequential testing strategy, using sputa, thoracoscopy VERSUS Sequential testing strategy, using sputa, fine needle aspiration, thoracoscopy IN 50-yo man with a radiographically detected large (>3 cm), peripheral lung mass suspicious for cancer | -1273000 | Increases Costs, Decreases Health | Raab et al., 1997 (488)      |
| Vinblastine + cisplatin VERSUS Best supportive care IN Patients with metastatic non-small-cell lung cancer                                                                                                                                           |          | Cost-Saving                       | Berthelot et al., 2000 (489) |
| Vinblastine + cisplatin VERSUS Vinorelbine IN Patients with metastatic non-small-cell lung cancer                                                                                                                                                    | 14408    | 22000                             | Berthelot et al., 2000 (489) |
| Vinblastine + cisplatin VERSUS Vinorelbine + cisplatin IN Patients with metastatic non-small-cell lung cancer                                                                                                                                        | 11648    | 18000                             | Berthelot et al., 2000 (489) |
| Vinblastine + cisplatin VERSUS Etoposide + cisplatin IN Patients with metastatic non-small-cell lung cancer                                                                                                                                          | 90883    | 140000                            | Berthelot et al., 2000 (489) |
| Vinblastine + cisplatin VERSUS Gemcitabine IN Patients with metastatic non-small-cell lung cancer                                                                                                                                                    | 13798    | 21000                             | Berthelot et al., 2000 (489) |
| Vinblastine + cisplatin VERSUS Paclitaxel + cisplatin, 200 mg/m <sup>2</sup> IN Patients with metastatic non-small-cell lung cancer                                                                                                                  | 34880    | 54000                             | Berthelot et al., 2000 (489) |
| Best supportive care VERSUS Paclitaxel + cisplatin, 200 mg/m <sup>2</sup> IN Patients with metastatic non-small-cell lung cancer                                                                                                                     | 21970    | 34000                             | Berthelot et al., 2000 (489) |
| Best supportive care VERSUS Vinorelbine IN Patients with metastatic non-small-cell lung cancer                                                                                                                                                       | 1937     | 3000                              | Berthelot et al., 2000 (489) |
| Best supportive care VERSUS Vinorelbine + cisplatin IN Patients with metastatic non-small-cell lung cancer                                                                                                                                           | 4399     | 6800                              | Berthelot et al., 2000 (489) |
| Best supportive care VERSUS Etoposide + cisplatin IN Patients with metastatic non-small-cell lung cancer                                                                                                                                             | 9301     | 14000                             | Berthelot et al., 2000 (489) |
| Best supportive care VERSUS Gemcitabine IN Patients with metastatic non-small-cell lung cancer                                                                                                                                                       | 6287     | 9800                              | Berthelot et al., 2000       |

**Appendix**  
**Cost-Utility Analysis of Cancer Prevention, Treatment, and Control: A Systematic Review**  
**Winn et al.**

|                                                                                                                                     |       |             |                              |
|-------------------------------------------------------------------------------------------------------------------------------------|-------|-------------|------------------------------|
|                                                                                                                                     |       |             | (489)                        |
| Vinorelbine VERSUS Gemcitabine IN Patients with metastatic non-small-cell lung cancer                                               | 13460 | 21000       | Berthelot et al., 2000 (489) |
| Vinorelbine VERSUS Vinorelbine + cisplatin IN Patients with metastatic non-small-cell lung cancer                                   | 9660  | 15000       | Berthelot et al., 2000 (489) |
| Vinorelbine VERSUS Etoposide + cisplatin IN Patients with metastatic non-small-cell lung cancer                                     |       | Cost-Saving | Berthelot et al., 2000 (489) |
| Vinorelbine VERSUS Paclitaxel + cisplatin, 200 mg/m <sup>2</sup> IN Patients with metastatic non-small-cell lung cancer             | 41663 | 65000       | Berthelot et al., 2000 (489) |
| Vinorelbine + cisplatin VERSUS Paclitaxel + cisplatin, 200 mg/m <sup>2</sup> IN Patients with metastatic non-small-cell lung cancer | 68917 | 110000      | Berthelot et al., 2000 (489) |
| Etoposide + cisplatin VERSUS Paclitaxel + cisplatin, 200 mg/m <sup>2</sup> IN Patients with metastatic non-small-cell lung cancer   | 29863 | 46000       | Berthelot et al., 2000 (489) |
| Gemcitabine VERSUS Paclitaxel + cisplatin, 200 mg/m <sup>2</sup> IN Patients with metastatic non-small-cell lung cancer             | 83282 | 130000      | Berthelot et al., 2000 (489) |
| Etoposide + cisplatin VERSUS Gemcitabine IN Patients with metastatic non-small-cell lung cancer                                     | 3482  | 5400        | Berthelot et al., 2000 (489) |
| Vinorelbine + cisplatin VERSUS Gemcitabine IN Patients with metastatic non-small-cell lung cancer                                   | 26297 | 41000       | Berthelot et al., 2000 (489) |
| Vinorelbine + cisplatin VERSUS Etoposide + cisplatin IN Patients with metastatic non-small-cell lung cancer                         |       | Cost-Saving | Berthelot et al., 2000 (489) |
| High-dose palliative radiotherapy VERSUS Best supportive care IN Patients with advanced non-small-cell lung cancer                  | 11479 | 17000       | Coy et al., 2000 (490)       |

**Appendix**  
**Cost-Utility Analysis of Cancer Prevention, Treatment, and Control: A Systematic Review**  
**Winn et al.**

|                                                                                                                                                                                                                                              |        |        |                              |
|----------------------------------------------------------------------------------------------------------------------------------------------------------------------------------------------------------------------------------------------|--------|--------|------------------------------|
| High-dose palliative radiotherapy VERSUS Best supportive care IN Patients with advanced non-small-cell lung cancer                                                                                                                           | 8661   | 13000  | Coy et al., 2000 (490)       |
| Selective mediastinoscopy VERSUS Chest computed tomography alone IN Patients with known non-smal-cell lung cancer (NSCLC) - T1 tumors                                                                                                        | 24500  | 35000  | Esnaola et al., 2002 (491)   |
| Routine mediastinoscopy VERSUS Selective mediastinoscopy IN Patients with known non-smal-cell lung cancer (NSCLC) - T1 tumors                                                                                                                | 78800  | 110000 | Esnaola et al., 2002 (491)   |
| Routine mediastinoscopy VERSUS Selective mediastinoscopy IN Patients with known non-smal-cell lung cancer (NSCLC) - T2 tumors                                                                                                                | 42800  | 61000  | Esnaola et al., 2002 (491)   |
| Selective mediastinoscopy VERSUS Chest computed tomography alone IN Patients with known non-smal-cell lung cancer (NSCLC) - T2 tumors                                                                                                        | 37900  | 54000  | Esnaola et al., 2002 (491)   |
| Routine mediastinoscopy VERSUS Selective mediastinoscopy IN Patients with known non-smal-cell lung cancer (NSCLC) - T3 tumors                                                                                                                | 53400  | 76000  | Esnaola et al., 2002 (491)   |
| Prophylactic cranial irradiation VERSUS No prophylactic cranial irradiation IN Patients in Canada with limited-stage small-cell lung cancer (SCLC) who have achieved a complete remission (assume utility of toxicity and relapse to be 1.0) | 696    | 1200   | Tai et al., 2002 (492)       |
| Prophylactic cranial irradiation VERSUS No prophylactic cranial irradiation IN Patients in Canada with limited-stage small-cell lung cancer (SCLC) who have achieved a complete remission (assume utility of toxicity and relapse to be .25) | 845    | 1400   | Tai et al., 2002 (492)       |
| Annual helical computed tomography (CT) screening VERSUS No screening IN A hypothetical cohort of current heavy-smokers (>20 pack-years) who were eligible for lung resection surgery - age 60                                               | 116300 | 160000 | Mahadevia et al., 2003 (493) |

**Appendix**  
**Cost-Utility Analysis of Cancer Prevention, Treatment, and Control: A Systematic Review**  
**Winn et al.**

|                                                                                                                                                                                                                                                                                                                                                                                                                                                                                                                                                                                   |         |         |                              |
|-----------------------------------------------------------------------------------------------------------------------------------------------------------------------------------------------------------------------------------------------------------------------------------------------------------------------------------------------------------------------------------------------------------------------------------------------------------------------------------------------------------------------------------------------------------------------------------|---------|---------|------------------------------|
| Annual helical computed tomography (CT) screening VERSUS No screening<br>IN A hypothetical cohort of quitting heavy-smokers (>20 pack-years) who were eligible for lung resection surgery - age 60                                                                                                                                                                                                                                                                                                                                                                                | 558600  | 750000  | Mahadevia et al., 2003 (493) |
| Annual helical computed tomography (CT) screening VERSUS No screening<br>IN A hypothetical cohort of former heavy-smokers (>20 pack-years) who were eligible for lung resection surgery - age 60                                                                                                                                                                                                                                                                                                                                                                                  | 2322700 | 3100000 | Mahadevia et al., 2003 (493) |
| Testing with computed tomography (CT); if CT results indeterminate, transthoracic needle biopsy; if CT results benign, watch and wait VERSUS Watchful waiting<br>IN All adult patients with a new noncalcified pulmonary nodule seen on chest radiograph (low probability of malignancy (26%))                                                                                                                                                                                                                                                                                    | 10935   | 15000   | Gould et al., 2003 (494)     |
| Testing with computed tomography (CT); if CT results indeterminate, testing with positron emission tomography with 18-fluorodeoxyglucose (FDG-PET); if FDG-PET results positive, surgery, if FDG-PET results negative, biopsy; if CT results benign, watch and w VERSUS Testing with CT; if CT results indeterminate, biopsy; if CT results benign, watch and wait<br>IN All adult patients with a new noncalcified pulmonary nodule seen on chest radiograph (low probability of malignancy (26%))                                                                               | 20445   | 27000   | Gould et al., 2003 (494)     |
| Testing with computed tomography (CT); if CT results indeterminate, transthoracic needle biopsy; if CT results benign, watch and wait VERSUS Watchful waiting<br>IN All adult patients with a new noncalcified pulmonary nodule seen on chest radiograph (high probability of malignancy (79%))                                                                                                                                                                                                                                                                                   | 6515    | 8700    | Gould et al., 2003 (494)     |
| Testing with computed tomography (CT); if results indeterminate, testing with positron emission tomography with 18-fluorodeoxyglucose (FDG-PET); if FDG-PET results positive, surgery; if FDG-PET results negative, biopsy; if CT results benign, biopsy VERSUS Testing with CT; if results indeterminate, testing with FDG-PET; if FDG-PET results positive, surgery; if FDG-PET results negative, biopsy; if CT results benign, watch and wait<br>IN All adult patients with a new noncalcified pulmonary nodule seen on chest radiograph (low probability of malignancy (26%)) | 45838   | 61000   | Gould et al., 2003 (494)     |

**Appendix**  
**Cost-Utility Analysis of Cancer Prevention, Treatment, and Control: A Systematic Review**  
**Winn et al.**

|                                                                                                                                                                                                                                                                                                                                                                                                                                                                                                                                                                                              |        |        |                             |
|----------------------------------------------------------------------------------------------------------------------------------------------------------------------------------------------------------------------------------------------------------------------------------------------------------------------------------------------------------------------------------------------------------------------------------------------------------------------------------------------------------------------------------------------------------------------------------------------|--------|--------|-----------------------------|
| Testing with computed tomography (CT) and positron emission tomography with 18-fluorodeoxyglucose (FDG-PET); if CT results indeterminate and FDG-PET results positive, surgery; if CT results benign and FDG-PET results negative, watch and wait; if CT results VERSUS Testing with CT; if results indeterminate, FDG-PET; if FDG-PET results positive, surgery; if FDG-PET results negative, transthoracic needle biopsy; if CT results benign, biopsy IN All adult patients with a new noncalcified pulmonary nodule seen on chest radiograph (low probability of malignancy (26%))       | 297212 | 400000 | Gould et al., 2003 (494)    |
| Testing with computed tomography (CT); if results indeterminate, surgery; if CT results benign, testing with positron emission tomography with 18-fluorodeoxyglucose (FDG-PET); if FDG-PET results positive, biopsy; if FDG-PET results negative, watch and wait VERSUS Testing with CT; if CT results indeterminate, biopsy; if CT results benign, watch and wait IN All adult patients with a new noncalcified pulmonary nodule seen on chest radiograph (high probability of malignancy (79%))                                                                                            | 16261  | 22000  | Gould et al., 2003 (494)    |
| Testing with computed tomography (CT); if CT results indeterminate, surgery; if CT results benign, testing with positron emission tomography with 18-fluorodeoxyglucose (FDG-PET); if FDG-PET results positive, surgery; if FDG-PET results negative, watchful w VERSUS Testing with CT; if CT results indeterminate, surgery; if CT results benign, testing with FDG-PET; if FDG-PET results positive, biopsy; if FDG-PET results negative, watchful waiting IN All adult patients with a new noncalcified pulmonary nodule seen on chest radiograph (high probability of malignancy (79%)) | 50839  | 68000  | Gould et al., 2003 (494)    |
| Testing with computed tomography (CT); if results indeterminate, surgery; if CT results benign, testing with positron emission tomography with 18-fluorodeoxyglucose (FDG-PET); if FDG-PET results positive, surgery; if FDG-PET results negative, biopsy VERSUS Testing with CT; if results indeterminate, surgery; if CT results benign, testing with FDG-PET; if FDG-PET results positive, surgery; if FDG-PET results negative, watch and wait IN All adult patients with a new noncalcified pulmonary nodule seen on chest radiograph (high probability of malignancy (79%))            | 67568  | 90000  | Gould et al., 2003 (494)    |
| Sleeve lobectomy VERSUS Pneumonectomy IN Patients with early stage lung cancer who have acceptable lung function                                                                                                                                                                                                                                                                                                                                                                                                                                                                             | 1039   | 1400   | Ferguson et al., 2003 (495) |

**Appendix**  
**Cost-Utility Analysis of Cancer Prevention, Treatment, and Control: A Systematic Review**  
**Winn et al.**

|                                                                                                                                                                            |       |        |                                 |
|----------------------------------------------------------------------------------------------------------------------------------------------------------------------------|-------|--------|---------------------------------|
| Resection after neoadjuvant therapy for N2 nodal disease VERSUS Initial resection IN Patients with lung cancer with N2 nodal disease identified at the time of thoracotomy | 17119 | 23000  | Ferguson et al., 2003 (496)     |
| Spiral computed tomography (CT) followed by treatment VERSUS No spiral CT IN Men at high risk for lung cancer - age 60-64                                                  | 57139 | 75000  | Manser et al., 2005 (497)       |
| Spiral computed tomography (CT) followed by treatment VERSUS No spiral CT IN Women at high risk for lung cancer - age 60-64                                                | 48164 | 63000  | Manser et al., 2005 (497)       |
| Continuous hyperfractionated and accelerated radiotherapy (CHART) VERSUS Conventional radiotherapy IN Non-small cell lung cancer patients                                  | 10687 | 15000  | Lievens et al., 2005 (498)      |
| Positron emission tomography (PET) plus computed tomography (CT) plus mediastinoscopy (MS) VERSUS PET plus CT IN Patients with non small cell lung carcinoma               | 7832  | 10000  | Hayashi et al., 2005 (499)      |
| Positron emission tomography (PET) plus computed tomography (CT) plus mediastinoscopy (MS) VERSUS CT only IN Patients with non small cell lung carcinoma                   | 4951  | 6400   | Hayashi et al., 2005 (499)      |
| Annual chest CT VERSUS Usual care IN Patients after resection of a stage IA non-small cell lung cancer - age 60                                                            | 47676 | 60000  | Kent et al., 2005 (500)         |
| Annual chest CT VERSUS Usual care IN Patients after resection of a stage IA non-small cell lung cancer - age 65                                                            | 61775 | 77000  | Kent et al., 2005 (500)         |
| Annual chest CT VERSUS Usual care IN Patients after resection of a stage IA non-small cell lung cancer - age 70                                                            | 84781 | 110000 | Kent et al., 2005 (500)         |
| VERSUS IN Patients in chemotherapy with symptomatic advanced nonsmall cell lung cancer                                                                                     | 12773 | 18000  | Dooms et al., 2006 (501)        |
| VERSUS IN Patients with inoperable stage IIIA/B or stage IV non-small-cell lung cancer.                                                                                    | 40900 | 50000  | van den Hout et al., 2006 (502) |
| Hypothetical new drug VERSUS Chemotherapy consisting of etoposide and cisplatin IN Patients with advanced small-cell lung cancer                                           | 45559 | 60000  | Uyl-de Groot et al., 2006 (503) |

**Appendix**  
**Cost-Utility Analysis of Cancer Prevention, Treatment, and Control: A Systematic Review**  
**Winn et al.**

|                                                                                                                                                                                                                                                                                                                                                      |         |             |                            |
|------------------------------------------------------------------------------------------------------------------------------------------------------------------------------------------------------------------------------------------------------------------------------------------------------------------------------------------------------|---------|-------------|----------------------------|
| Pemetrexed + cisplatin VERSUS Cisplatin IN Patients with unresectable malignant pleural mesothelioma in United Kingdom                                                                                                                                                                                                                               | 95002   | 120000      | Cordony et al., 2008 (504) |
| Pemetrexed+cisplatin VERSUS Mitomycin-C, vinblastine, cisplatin IN Patients with unresectable malignant pleural mesothelioma in United Kingdom                                                                                                                                                                                                       | 39559   | 48000       | Cordony et al., 2008 (504) |
| Pemetrexed+cisplatin VERSUS Vinorelbine with or without platinum IN Patients with unresectable malignant pleural mesothelioma in United Kingdom                                                                                                                                                                                                      | 48125   | 58000       | Cordony et al., 2008 (504) |
| Pemetrexed + cisplatin VERSUS Active symptom control IN Patients with unresectable malignant pleural mesothelioma in United Kingdom                                                                                                                                                                                                                  | 58372   | 71000       | Cordony et al., 2008 (504) |
| Erlotinib VERSUS Docetaxel IN 60 years old patients with advanced NSCLC who failed at least one platinum-based chemotherapy regimen                                                                                                                                                                                                                  | -212700 | Cost-Saving | Carlson et al., 2008 (505) |
| Erlotinib VERSUS Pemetrexed IN 60 years old patients with advanced NSCLC who failed at least one platinum-based chemotherapy regimen                                                                                                                                                                                                                 | -678200 | Cost-Saving | Carlson et al., 2008 (505) |
| Pemetrexed VERSUS Docetaxel IN 60 years old patients with advanced NSCLC who failed at least one platinum-based chemotherapy regimen                                                                                                                                                                                                                 | 1743359 | 2000000     | Carlson et al., 2008 (505) |
| CT screening for lung cancer VERSUS Usual care, no CT screening IN UK aged (61 years old +) men                                                                                                                                                                                                                                                      | 25641   | 30000       | Whynes et al., 2008 (506)  |
| Gene copy number testing for EGFR protein expression VERSUS Immunohistochemical testing for EGFR protein expression IN US patients with non-small-cell lung cancer at least 60 years of age, who failed at least one platinum-based chemotherapy regimen and were eligible for treatment with ERL or other chemotherapy in the second-line treatment | 146750  | 170000      | Carlson et al., 2008 (507) |

**Appendix**  
**Cost-Utility Analysis of Cancer Prevention, Treatment, and Control: A Systematic Review**  
**Winn et al.**

|                                                                                                                                                                                                                                                                                                           |          |                                      |                            |
|-----------------------------------------------------------------------------------------------------------------------------------------------------------------------------------------------------------------------------------------------------------------------------------------------------------|----------|--------------------------------------|----------------------------|
| Immunohistochemical testing for EGFR protein expression VERSUS Erlotinib IN US patients with non-small-cell lung cancer at least 60 years of age, who failed at least one platinum-based chemotherapy regimen and were eligible for treatment with ERL or other chemotherapy in the second-line treatment | 156850   | 180000                               | Carlson et al., 2008 (507) |
| Gene copy number testing for EGFR protein expression VERSUS Erlotinib IN US patients with non-small-cell lung cancer at least 60 years of age, who failed at least one platinum-based chemotherapy regimen and were eligible for treatment with ERL or other chemotherapy in the second-line treatment    | 162018   | 190000                               | Carlson et al., 2008 (507) |
| Erlonitib 150 mg/day (4 cycles of 7 days per month) VERSUS Best supportive care IN Male and female Portuguese patients with advanced or metastatic non-small cell lung cancer that has failed at least one chemotherapy regimen                                                                           | 238175   | 260000                               | Araújo et al., 2008 (508)  |
| Docetaxel 75 mg/m <sup>2</sup> 1st day of 21 day cycle VERSUS Erlonitib 150 mg/day (4 cycles of 7 days per month) IN Male and female Portuguese patients with advanced or metastatic non-small cell lung cancer that has failed at least one chemotherapy regimen                                         | -163984  | Increases Costs,<br>Decreases Health | Araújo et al., 2008 (508)  |
| Pemetrexed 500 mg/m <sup>2</sup> , 1st day of 21 day cycle VERSUS Erlonitib 150 mg/day (4 cycles of 7 days per month) IN Male and female Portuguese patients with advanced or metastatic non-small cell lung cancer that has failed at least one chemotherapy regimen                                     | -1028174 | Increases Costs,<br>Decreases Health | Araújo et al., 2008 (508)  |
| Indoor Radon remediation via ducting for the exhaust of radon VERSUS Usual behavior, no remediation IN Home dwellers in the United Kingdom living in previously built homes                                                                                                                               | 39       | 44                                   | Gray et al., 2009 (509)    |



**Appendix**  
**Cost-Utility Analysis of Cancer Prevention, Treatment, and Control: A Systematic Review**  
**Winn et al.**

|                                                                                                                                                                                                                                |        |             |                             |
|--------------------------------------------------------------------------------------------------------------------------------------------------------------------------------------------------------------------------------|--------|-------------|-----------------------------|
| Indoor Radon remediation via ducting for the exhaust of radon in new homes' construction VERSUS Usual behavior, no remediation IN Home dwellers in the United Kingdom who could move into new homes being built                | 8      | 10          | Gray et al., 2009 (509)     |
| Indoor Radon remediation via ducting for the exhaust of radon in new homes' construction VERSUS Usual behavior, no remediation IN Home dwellers in the United Kingdom (median radon concentration 21 Bq/m <sup>3</sup> radon). | 22823  | 26000       | Gray et al., 2009 (509)     |
| Smoking cessation program initiated before surgical lung resection VERSUS Usual care IN Active smokers with surgically resectable lung cancer, 2 years post-surgery                                                            | 7441   | 8500        | Slatore et al., 2009 (510)  |
| Smoking cessation program initiated before surgical lung resection VERSUS Usual care IN Active smokers with surgically resectable lung cancer, 3 years post-surgery                                                            | 4649   | 5300        | Slatore et al., 2009 (510)  |
| Smoking cessation program initiated before surgical lung resection VERSUS Usual care IN Active smokers with surgically resectable lung cancer, 4 years post-surgery                                                            | 3344   | 3800        | Slatore et al., 2009 (510)  |
| Smoking cessation program initiated before surgical lung resection VERSUS Usual care IN Active smokers with surgically resectable lung cancer, 5 years post-surgery                                                            | 2609   | 3000        | Slatore et al., 2009 (510)  |
| Smoking cessation program initiated before surgical lung resection VERSUS Usual care IN Active smokers with surgically resectable lung cancer, 1 year post-surgery                                                             | 16145  | 18000       | Slatore et al., 2009 (510)  |
| CT-based follow up VERSUS IN Dutch Non-small cell lung cancer patients in follow up therapy                                                                                                                                    | 388804 | 430000      | van Loon et al., 2010 (511) |
| PET-CT-based follow up VERSUS CT-based follow up IN Dutch Non-small cell lung cancer patients in follow up therapy                                                                                                             | 101733 | 110000      | van Loon et al., 2010 (511) |
| Pemetrexed VERSUS Docetaxel IN Spanish patients with advanced or metastatic non-small cell lung cancer                                                                                                                         | 32860  | 38000       | Asukai et al., 2010 (512)   |
| Erlotinib VERSUS Docetaxel IN Patients with advanced non-small-cell lung cancer needing second line treatment in the United Kingdom                                                                                            | -13097 | Cost-Saving | Lewis et al., 2010 (513)    |

**Appendix**  
**Cost-Utility Analysis of Cancer Prevention, Treatment, and Control: A Systematic Review**  
**Winn et al.**

|                                                                                                                                                                                                                                                                                          |         |                                   |                                |
|------------------------------------------------------------------------------------------------------------------------------------------------------------------------------------------------------------------------------------------------------------------------------------------|---------|-----------------------------------|--------------------------------|
| Carbon-ion radiotherapy VERSUS Stereotactic body radiotherapy with photons IN Inoperable stage I non-small cell lung cancer                                                                                                                                                              | 92214   | 110000                            | Grutters et al., 2010 (514)    |
| Carbon-ion radiotherapy VERSUS Stereotactic body radiotherapy with photons IN Operable stage I non-small cell lung cancer                                                                                                                                                                | -210287 | Increases Costs, Decreases Health | Grutters et al., 2010 (514)    |
| Second-line treatment with oral topotecan + best supportive care VERSUS Best supportive care IN UK patients diagnosed with small cell lung cancer treated with first-line chemotherapy                                                                                                   | 67770   | 77000                             | Hartwell et al., 2010 (515)    |
| Usual smoking-cessation (USC) plus genetic test VERSUS Usual smoking-cessation (USC) IN Heavy smokers aged 50 years (>20 cigarettes per day) in Australia                                                                                                                                | 21855   | 24000                             | Gordon et al., 2010 (516)      |
| Adding cetuximab to standard cisplatin-vinorelbine first-line chemotherapy VERSUS Standard cisplatin-vinorelbine first-line chemotherapy IN Swiss patients with extracellular portion of epidermal growth factor receptor (EGFR), expressing advanced non-small-cell lung cancer (NSCLC) | 524259  | 580000                            | Joerger et al., 2010 (517)     |
| Integrated PET/CT VERSUS CT IN Patients with suspected or histologically proven non-small cell lung cancer (NSCLC)                                                                                                                                                                       | 79878   | 94000                             | Schreyögg et al., 2010 (518)   |
| Second-line pemetrexed therapy (500 mg/sq.m) VERSUS Best supportive care IN Patients over 18 years with stage IIIB or IV non-small cell lung cancer (NSCLC) who had progressed after first-line cisplatin-based chemotherapy                                                             | 57108   | 63000                             | Vergnenegre et al., 2011 (519) |
| Second-line docetaxel therapy (75 mg/sq.m) VERSUS Second-line pemetrexed therapy (500 mg/sq.m) IN Patients over 18 years with stage IIIB or IV non-small cell lung cancer (NSCLC) who had progressed after first-line cisplatin-based chemotherapy                                       | -430327 | Cost-Saving                       | Vergnenegre et al., 2011 (519) |
| Second-line docetaxel therapy (75 mg/sq.m) VERSUS Best supportive care IN Patients over 18 years with stage IIIB or IV non-small cell lung cancer (NSCLC) who had progressed after first-line cisplatin-based chemotherapy                                                               | 45502   | 50000                             | Vergnenegre et al., 2011 (519) |

**Appendix**  
**Cost-Utility Analysis of Cancer Prevention, Treatment, and Control: A Systematic Review**  
**Winn et al.**

|                                                                                                                                                                                                           |         |                                   |                             |
|-----------------------------------------------------------------------------------------------------------------------------------------------------------------------------------------------------------|---------|-----------------------------------|-----------------------------|
| Stereotactic body radiotherapy (SBRT) VERSUS Three-dimensional conformal radiation therapy (3D-CRT) IN United states 65 year old men with medically inoperable Stage 1 non-small-cell lung cancer (NSCLC) | 6000    | 6600                              | Sher et al., 2011 (520)     |
| Three-dimensional conformal radiation therapy (3D-CRT) VERSUS Radiofrequency ablation (RFA) IN United states 65 year old men with medically inoperable Stage 1 non-small-cell lung cancer (NSCLC)         | 52400   | 58000                             | Sher et al., 2011 (520)     |
| Nicotine replacement therapy VERSUS None IN UK smokers who recently initiated quit attempts                                                                                                               | 556     | 610                               | Taylor et al., 2011 (521)   |
| Varenicline (1 mg tablets twice daily for 77 days) VERSUS None IN UK smokers who recently initiated quit attempts                                                                                         | 3906    | 4300                              | Taylor et al., 2011 (521)   |
| Bupropion (150 mg tablet once daily for 6 days, then twice daily for 7 weeks) VERSUS None IN UK smokers who recently initiated quit attempts                                                              | -1801   | Cost-Saving                       | Taylor et al., 2011 (521)   |
| Consolidation therapy VERSUS Non-consolidation therapy IN Japanese men aged 60 years with stage IIIB and IV NSCLC (non-small cell lung cancer)- all histology                                             | 203022  | 220000                            | Tsuchiya et al., 2011 (522) |
| Consolidation therapy VERSUS Non-consolidation therapy IN Japanese men aged 60 years with stage IIIB and IV NSCLC (non-small cell lung cancer)- non-squamous cell carcinoma.                              | 150115  | 170000                            | Tsuchiya et al., 2011 (522) |
| Consolidation therapy VERSUS Non-consolidation therapy IN Japanese men aged 60 years with stage IIIB and IV NSCLC (non-small cell lung cancer)- adenocarcinoma                                            | 208778  | 230000                            | Tsuchiya et al., 2011 (522) |
| Consolidation therapy with pemetrexed VERSUS Non-consolidation therapy IN Japanese men aged 60 years with stage IIIB and IV NSCLC (non-small cell lung cancer)- squamous cell carcinoma                   | -370858 | Increases Costs, Decreases Health | Tsuchiya et al., 2011 (522) |
| Zoledronic acid (4 mg) IV every 3 weeks for up to 21 months. VERSUS Placebo IN Patients with non small cell lung cancer (NSCLC) with bone metastases in France                                            | 1078    | 1200                              | Joshi et al., 2011 (523)    |
| Zoledronic acid (4 mg) IV every 3 weeks for up to 21 months VERSUS Placebo IN Patients with non small cell lung cancer (NSCLC) with bone metastases in Germany                                            | -19743  | Cost-Saving                       | Joshi et al., 2011 (523)    |

**Appendix**  
**Cost-Utility Analysis of Cancer Prevention, Treatment, and Control: A Systematic Review**  
**Winn et al.**

|                                                                                                                                                                                                                                                                                                                                                  |        |             |                                  |
|--------------------------------------------------------------------------------------------------------------------------------------------------------------------------------------------------------------------------------------------------------------------------------------------------------------------------------------------------|--------|-------------|----------------------------------|
| Zoledronic acid (4 mg) IV every 3 weeks for up to 21 months VERSUS Placebo IN UK patients with non small cell lung cancer (NSCLC) with bone metastases                                                                                                                                                                                           | -14328 | Cost-Saving | Joshi et al., 2011 (523)         |
| Zoledronic acid (4 mg) IV every 3 weeks for up to 21 months VERSUS Placebo IN Patients with non small cell lung cancer (NSCLC) with bone metastases in Portugal                                                                                                                                                                                  | -7747  | Cost-Saving | Joshi et al., 2011 (523)         |
| Zoledronic acid (4 mg) IV every 3 weeks for up to 21 months VERSUS Placebo IN Patients with non small cell lung cancer (NSCLC) with bone metastases in Netherlands                                                                                                                                                                               | 11350  | 13000       | Joshi et al., 2011 (523)         |
| Clinically guided second-line treatment (non-smoker women with adenocarcinoma receive erlotinib) VERSUS No patient selection strategy (all patients were assumed to receive erlotinib) IN French patients with advanced non-small-cell lung cancer who have failed platinum-based chemotherapy and eligible for second-line erlotinib initiation | -83046 | Cost-Saving | Borget et al., 2011 (524)        |
| Biologically guided second-line treatment (patients with known EGFR mutations receive erlotinib) VERSUS No patient selection strategy (all patients were assumed to receive erlotinib) IN French patients with advanced non-small-cell lung cancer who have failed platinum-based chemotherapy and eligible for second-line erlotinib initiation | -95010 | Cost-Saving | Borget et al., 2011 (524)        |
| First-line treatment with gefitinib in patients with activating EGFR mutations VERSUS First-line treatment with chemotherapy in patients with activating EGFR mutations IN patients with advanced lung cancer with activating epidermal growth factor receptor (EGFR) mutations                                                                  |        | Cost-Saving | de Lima Lopes et al., 2011 (525) |
| EGFR (epidermal growth factor receptor) testing and first-line treatment with gefitinib in patients with activating EGFR mutations VERSUS Standard practice (first-line treatment with chemotherapy followed by gefitinib) IN Patients with advanced adenocarcinoma of the lung                                                                  | -44063 | Cost-Saving | de Lima Lopes et al., 2011 (525) |
| Annual computed tomography (CT) screening for lung cancer VERSUS None IN US males aged 70 years with smoking history of at least 20 pack-years                                                                                                                                                                                                   | 169000 | 200000      | McMahon et al., 2011 (526)       |
| Annual computed tomography (CT) screening for lung cancer VERSUS None IN US males aged 60 years with smoking history of at least 20 pack-years                                                                                                                                                                                                   | 135000 | 160000      | McMahon et al., 2011 (526)       |

**Appendix**  
**Cost-Utility Analysis of Cancer Prevention, Treatment, and Control: A Systematic Review**  
**Winn et al.**

|                                                                                                                                                                                                                                |        |        |                            |
|--------------------------------------------------------------------------------------------------------------------------------------------------------------------------------------------------------------------------------|--------|--------|----------------------------|
| Annual computed tomography (CT) screening for lung cancer VERSUS None IN US females aged 50 years with smoking history of at least 20 pack-years                                                                               | 137000 | 160000 | McMahon et al., 2011 (526) |
| Annual computed tomography (CT) screening for lung cancer VERSUS None IN US females aged 60 years with smoking history of at least 20 pack-years                                                                               | 126000 | 150000 | McMahon et al., 2011 (526) |
| Annual computed tomography (CT) screening for lung cancer VERSUS None IN US females aged 70 years with smoking history of at least 20 pack-years                                                                               | 159000 | 190000 | McMahon et al., 2011 (526) |
| Annual computed tomography (CT) screening for lung cancer VERSUS None IN US current and former heavy smoker males aged 70 years with smoking history of at least 40 pack-years                                                 | 166000 | 190000 | McMahon et al., 2011 (526) |
| Annual computed tomography (CT) screening for lung cancer VERSUS None IN US current and former heavy smoker females aged 60 years                                                                                              | 110000 | 130000 | McMahon et al., 2011 (526) |
| Annual computed tomography (CT) screening for lung cancer VERSUS None IN US current and former heavy smoker males aged 70 years who quit = 10 years ago                                                                        | 147000 | 170000 | McMahon et al., 2011 (526) |
| Annual computed tomography (CT) screening for lung cancer VERSUS None IN US current and former smoker females aged 60 years who quit = 10 years ago                                                                            | 112000 | 130000 | McMahon et al., 2011 (526) |
| Annual computed tomography (CT) screening for lung cancer VERSUS None IN US current and former smoker males aged 70 years                                                                                                      | 149000 | 170000 | McMahon et al., 2011 (526) |
| Annual computed tomography (CT) screening for lung cancer VERSUS None IN US current heavy smoker females aged 60 years                                                                                                         | 112000 | 130000 | McMahon et al., 2011 (526) |
| Annual computed tomography (CT) screening for lung cancer and bupropion and nicotine replacement therapy to current smokers at the screening examination VERSUS None IN US current and former heavy smoker males aged 50 years | 144500 | 170000 | McMahon et al., 2011 (526) |

**Appendix**  
**Cost-Utility Analysis of Cancer Prevention, Treatment, and Control: A Systematic Review**  
**Winn et al.**

|                                                                                                                                                                                                                                                                                |        |        |                            |
|--------------------------------------------------------------------------------------------------------------------------------------------------------------------------------------------------------------------------------------------------------------------------------|--------|--------|----------------------------|
| Annual computed tomography (CT) screening for lung cancer and bupropion and nicotine replacement therapy to current smokers at the screening examination VERSUS None IN US current and former heavy smoker females aged 50 years                                               | 130500 | 150000 | McMahon et al., 2011 (526) |
| Annual smoking cessation therapy VERSUS None IN US current smoker males aged 50 years                                                                                                                                                                                          | 57600  | 68000  | McMahon et al., 2011 (526) |
| Annual smoking cessation therapy VERSUS None IN US current smoker females aged 50 years                                                                                                                                                                                        | 69400  | 81000  | McMahon et al., 2011 (526) |
| One-time smoking cessation therapy VERSUS None IN US current smoker males aged 50 years with smoking history of at least 20 pack-years                                                                                                                                         | 49100  | 58000  | McMahon et al., 2011 (526) |
| One-time smoking cessation therapy VERSUS None IN US current smoker females aged 50 years with smoking history of at least 20 pack-years                                                                                                                                       | 69300  | 81000  | McMahon et al., 2011 (526) |
| Annual computed tomography (CT) screening for lung cancer VERSUS None IN US males aged 50 years with smoking history of at least 20 pack-years                                                                                                                                 | 149000 | 170000 | McMahon et al., 2011 (526) |
| 6 cycles of carboplatin and paclitaxel (200mg/sq.m) plus bevacizumab (15mg/kg) given intravenously for 3 weeks VERSUS 6 cycles of carboplatin and paclitaxel (200mg/sq.m) given intravenously for 3 weeks IN US patients with stage IIIB/IV non-small cell lung cancer (NSCLC) | 559609 | 610000 | Goulart et al., 2011 (527) |
| Erlonitib VERSUS Placebo IN UK patients with stable non-small cell lung cancer with non-squamous histology                                                                                                                                                                     | 98633  | 110000 | Dickson et al., 2011 (528) |
| Pemetrexed VERSUS Erlotinib IN UK patients with stable non-small cell lung cancer with non-squamous histology                                                                                                                                                                  | 121668 | 130000 | Dickson et al., 2011 (528) |

**Appendix**  
**Cost-Utility Analysis of Cancer Prevention, Treatment, and Control: A Systematic Review**  
**Winn et al.**

|                                                                                                                                                                                                                                                                                                                                                                                                                                                 |        |             |                                   |
|-------------------------------------------------------------------------------------------------------------------------------------------------------------------------------------------------------------------------------------------------------------------------------------------------------------------------------------------------------------------------------------------------------------------------------------------------|--------|-------------|-----------------------------------|
| Pemetrexed VERSUS Placebo IN UK patients with stable non-small cell lung cancer with non-squamous histology                                                                                                                                                                                                                                                                                                                                     | 109028 | 120000      | Dickson et al., 2011 (528)        |
| Erlonitib VERSUS Placebo IN UK patients with stable non-small cell lung cancer with squamous histology.                                                                                                                                                                                                                                                                                                                                         | 64885  | 72000       | Dickson et al., 2011 (528)        |
| Vinorelbine (25 mg/m <sup>2</sup> ) + cisplatin (30 mg/m <sup>2</sup> ) along with rh-endostatin (7.5 mg/m <sup>2</sup> ) for 4 cycles (endostatin strategy) VERSUS Vinorelbine (25 mg/m <sup>2</sup> ) + cisplatin (30 mg/m <sup>2</sup> ) for 4 cycles (NP strategy) IN Patients aged 18 to 76 years with newly diagnosed stage IIIB (malignant pleural effusion) or stage IV cancer or recurrent NSCLC (non small cell lung cancer) in China | 24454  | 27000       | Wu et al., 2011 (529)             |
| Carboplatin plus paclitaxel (200mg/m <sup>2</sup> ) VERSUS Cisplatin (80mg/m <sup>2</sup> ) plus vinblastine and mitomycin (MVP) IN Patients with locally advanced (stage IIIB) or metastatic (stage IV) non-small cell carcinomas of the lung (NSCLC)                                                                                                                                                                                          | 10964  | 12000       | Thongprasert et al., 2011 (530)   |
| Maintenance therapy with pemetrexed plus best supportive care VERSUS Best supportive care IN Patients with stage IIIB or IV advanced non-squamous cell lung cancer in Switzerland                                                                                                                                                                                                                                                               | 140552 | 150000      | Matter-Walstra et al., 2012 (531) |
| Gefitinib VERSUS Docetaxel IN Patients with non-small cell lung cancer in Thailand                                                                                                                                                                                                                                                                                                                                                              | -17643 | Cost-Saving | Thongprasert et al., 2012 (532)   |
| Pemetrexed VERSUS Docetaxel IN Patients with non-small cell lung cancer in Thailand                                                                                                                                                                                                                                                                                                                                                             | 237150 | 260000      | Thongprasert et al., 2012 (532)   |
| Erlotinib VERSUS Docetaxel IN Patients with non-small cell lung cancer in Thailand                                                                                                                                                                                                                                                                                                                                                              | 124703 | 140000      | Thongprasert et al., 2012 (532)   |
| Immunohistochemistry biomarker screening VERSUS None IN Patients with advanced stage non-small cell lung cancer                                                                                                                                                                                                                                                                                                                                 | 57165  | 62000       | Atherly et al., 2012 (533)        |
| Fluorescence in-situ hybridisation biomarker screening VERSUS None IN Patients with advanced stage non-small cell lung cancer and tumours with adenocarcinoma histology                                                                                                                                                                                                                                                                         | 46144  | 50000       | Atherly et al., 2012 (533)        |

**Appendix**  
**Cost-Utility Analysis of Cancer Prevention, Treatment, and Control: A Systematic Review**  
**Winn et al.**

|                                                                                                                                                                                                                                                          |       |       |                            |
|----------------------------------------------------------------------------------------------------------------------------------------------------------------------------------------------------------------------------------------------------------|-------|-------|----------------------------|
| Reverse transcription-PCR biomarker screening VERSUS None IN Patients with advanced stage non-small cell lung cancer and tumours with adenocarcinoma histology                                                                                           | 41200 | 45000 | Atherly et al., 2012 (533) |
| Immunohistochemistry biomarker screening VERSUS None IN Patients with advanced stage non-small cell lung cancer and tumours with adenocarcinoma histology                                                                                                | 24720 | 27000 | Atherly et al., 2012 (533) |
| Fluorescence in-situ hybridisation biomarker screening VERSUS None IN Non-smoking patients with advanced stage non-small cell lung cancer and tumours with adenocarcinoma histology                                                                      | 12462 | 14000 | Atherly et al., 2012 (533) |
| Reverse transcription-PCR biomarker screening VERSUS None IN Non-smoking patients with advanced stage non-small cell lung cancer and tumours with adenocarcinoma histology                                                                               | 11127 | 12000 | Atherly et al., 2012 (533) |
| Immunohistochemistry biomarker screening VERSUS None IN Non-smoking patients with advanced stage non-small cell lung cancer and tumours with adenocarcinoma histology                                                                                    | 6676  | 7200  | Atherly et al., 2012 (533) |
| Fluorescence in-situ hybridisation biomarker screening VERSUS None IN Non-smoking patients with advanced stage non-small cell lung cancer, tumours with adenocarcinoma histology and wild type for both EGFR (epidermal growth factor receptor) and KRAS | 4756  | 5200  | Atherly et al., 2012 (533) |
| Reverse transcription-PCR biomarker screening VERSUS None IN Non-smoking patients with advanced stage non-small cell lung cancer, tumours with adenocarcinoma histology and wild type for both EGFR (epidermal growth factor receptor) and KRAS          | 4246  | 4600  | Atherly et al., 2012 (533) |



**Appendix**  
**Cost-Utility Analysis of Cancer Prevention, Treatment, and Control: A Systematic Review**  
**Winn et al.**

|                                                                                                                                                                                                                                                                                                                                                                                                                                                                                       |        |        |                            |
|---------------------------------------------------------------------------------------------------------------------------------------------------------------------------------------------------------------------------------------------------------------------------------------------------------------------------------------------------------------------------------------------------------------------------------------------------------------------------------------|--------|--------|----------------------------|
| Immunohistochemistry biomarker screening VERSUS None IN Non-smoking patients with advanced stage non-small cell lung cancer, tumours with adenocarcinoma histology and wild type for both EGFR (epidermal growth factor receptor) and KRAS                                                                                                                                                                                                                                            | 2548   | 2800   | Atherly et al., 2012 (533) |
| Fluorescence in-situ hybridisation biomarker screening VERSUS None IN Patients with advanced stage non-small cell lung cancer                                                                                                                                                                                                                                                                                                                                                         | 106707 | 120000 | Atherly et al., 2012 (533) |
| First-line chemotherapy treatment with erlotinib VERSUS First-line chemotherapy treatment with gefitinib IN Patients with EGFR-TK mutation-positive advanced or metastatic non-small-cell lung cancer                                                                                                                                                                                                                                                                                 | 33769  | 37000  | Dillon et al., 2012 (534)  |
| Epidermal growth factor receptor (EGFR) mutation testing strategy only on patients with sufficient tumor tissue (test strategy) VERSUS No testing and all patients were treated with combination chemotherapy with a platinum agent IN Patients with stage IV adenocarcinoma                                                                                                                                                                                                          | 110644 | 120000 | Handorf et al., 2012 (535) |
| Epidermal growth factor receptor (EGFR) mutation testing strategy for patients without available tissue, underwent a repeat biopsy to provide tissue for testing (rebiopsy strategy) VERSUS EGFR mutation testing strategy only on patients with sufficient tumor tissue (test strategy) IN Patients with stage IV adenocarcinoma                                                                                                                                                     | 122234 | 130000 | Handorf et al., 2012 (535) |
| Epidermal growth factor receptor (EGFR) mutation testing strategy for patients without available tissue, underwent a repeat biopsy to provide tissue for testing (rebiopsy strategy) followed by treatment with carboplatin plus premetrexed VERSUS EGFR mutation testing strategy for patients without available tissue, underwent a repeat biopsy to provide tissue for testing (rebiopsy strategy) followed by treatment with premetrexed IN Patients with stage IV adenocarcinoma | 180665 | 200000 | Handorf et al., 2012 (535) |

**Appendix**  
**Cost-Utility Analysis of Cancer Prevention, Treatment, and Control: A Systematic Review**  
**Winn et al.**

|                                                                                                                                                                                                                                                                                                                                                                                                                                                                                                                   |        |             |                            |
|-------------------------------------------------------------------------------------------------------------------------------------------------------------------------------------------------------------------------------------------------------------------------------------------------------------------------------------------------------------------------------------------------------------------------------------------------------------------------------------------------------------------|--------|-------------|----------------------------|
| Epidermal growth factor receptor (EGFR) mutation testing strategy for patients without available tissue, underwent a repeat biopsy to provide tissue for testing (rebiopsy strategy) followed by treatment with carboplatin, premetrexed and bevacizumab VERSUS EGFR mutation testing strategy for patients without available tissue, underwent a repeat biopsy to provide tissue for testing (rebiopsy strategy) followed by treatment with premetrexed and carboplatin IN Patients with stage IV adenocarcinoma | 359619 | 400000      | Handorf et al., 2012 (535) |
| VERSUS IN Specific disease- Advanced nonsquamous non-small-cell Lung Cancer; Age- Unknown; Gender- Not Specified; Country- China.                                                                                                                                                                                                                                                                                                                                                                                 | 124793 | 140000      | Zeng et al., 2013 (536)    |
| Gene-guided (EGFR mutation-positive tumors) gefitinib switch maintenance therapy without gefitinib patients assistance program (GPAP) VERSUS Routine follow-up IN Specific disease- Non-small cell lung cancer; Age- Unknown; Gender- Both; Country- China; Other- advanced EGFR mutation-positive, first line chemotherapy program.                                                                                                                                                                              | 57066  | 59000       | Zhu et al., 2013 (537)     |
| Gene-guided (EGFR mutation-positive tumors) gefitinib switch maintenance therapy with gefitinib patients assistance program (GPAP) VERSUS Routine follow-up IN Specific disease- Non-small cell lung cancer; Age- Unknown; Gender- Both; Country- China; Other- advanced EGFR mutation-positive, first line chemotherapy completed with 10 years.                                                                                                                                                                 | 15665  | 16000       | Zhu et al., 2013 (537)     |
| Lobectomy VERSUS SBRT-CO (stereotactic body radiation therapy-clearly operable) IN Specific disease- Stage I Non-Small Cell Lung Cancer; Age- Adult; Gender- Both; Country- United States.                                                                                                                                                                                                                                                                                                                        | 13200  | 14000       | Shah et al., 2013 (538)    |
| SBRT-CO (stereotactic body radiation therapy-clearly operable) VERSUS SBRT-MO (marginally operable) IN Specific disease- Stage I Non-Small Cell Lung Cancer; Age- Adult; Gender- Both; Country- United States.                                                                                                                                                                                                                                                                                                    | -11039 | Cost-Saving | Shah et al., 2013 (538)    |

**Appendix**  
**Cost-Utility Analysis of Cancer Prevention, Treatment, and Control: A Systematic Review**  
**Winn et al.**

|                                                                                                                                                                                                                                                                                                                                                                                               |       |       |                                |
|-----------------------------------------------------------------------------------------------------------------------------------------------------------------------------------------------------------------------------------------------------------------------------------------------------------------------------------------------------------------------------------------------|-------|-------|--------------------------------|
| Screening for lung cancer VERSUS None IN Specific disease- current smokers and former smokers; Age- 41 to 64 years; Gender- Both; Country- United States.                                                                                                                                                                                                                                     | 28240 | 29000 | Villanti et al., 2013 (539)    |
| Screening for lung cancer + light smoking cessation intervention VERSUS None IN Specific disease- current smokers and former smokers; Age- 41 to 64 years; Gender- Both; Country- United States; Other- all current smokers and half of the former smokers between age 50 and 64 to be eligible for lung cancer screening, with eligibility set as at least 30 pack-years of smoking history. | 23185 | 24000 | Villanti et al., 2013 (539)    |
| Screening for lung cancer + intensive smoking cessation intervention: NRT generic plus behavioral VERSUS None IN Specific disease- current smokers and former smokers; Age- 41 to 64 years; Gender- Both; Country- United States.                                                                                                                                                             | 16198 | 17000 | Villanti et al., 2013 (539)    |
| Screening for lung cancer + intensive smoking cessation intervention: bupropion generic plus behavioral VERSUS None IN Specific disease- current smokers and former smokers; Age- 41 to 64 years; Gender- Both; Country- United States.                                                                                                                                                       | 16656 | 17000 | Villanti et al., 2013 (539)    |
| Screening for lung cancer + intensive smoking cessation intervention: chantix plus behavioral VERSUS None IN Specific disease- current smokers and former smokers; Age- 41 to 64 years; Gender- Both; Country- United States.                                                                                                                                                                 | 17310 | 18000 | Villanti et al., 2013 (539)    |
| Low dose computed tomography screening VERSUS Standard/Usual Care IN Specific disease- lung cancer; Age- 41 to 64 years, >=65 years; Gender- Both; Country- Israel.                                                                                                                                                                                                                           | 1464  | 1500  | Shmueli et al., 2013 (540)     |
| Positron emission tomography (PET) scan + sending all patients for surgery VERSUS None IN Specific disease- non-small cell lung cancer; Age- Adult; Gender- Both; Country- Iran.                                                                                                                                                                                                              | 936   | 1000  | Akbari Sari et al., 2013 (541) |
| VeriStrat (serum proteomic test) guided strategy & chemotherapy with docetaxel VERSUS Erlotinib to all IN Specific disease- non-small cell lung cancer; Age- 41 to 64 years; Gender- Both; Country- United States.                                                                                                                                                                            | 91111 | 99000 | Nelson et al., 2013 (542)      |

**Appendix**  
**Cost-Utility Analysis of Cancer Prevention, Treatment, and Control: A Systematic Review**  
**Winn et al.**

|                                                                                                                                                                                                                                                             |         |             |                              |
|-------------------------------------------------------------------------------------------------------------------------------------------------------------------------------------------------------------------------------------------------------------|---------|-------------|------------------------------|
| VeriStrat (serum proteomic test) guided strategy & chemotherapy with pemetrexed VERSUS Performance status guided selection strategy (PS-guided) IN Specific disease- non-small cell lung cancer; Age- 41 to 64 years; Gender- Both; Country- United States. | -148538 | Cost-Saving | Nelson et al., 2013 (542)    |
| VeriStrat (serum proteomic test) guided strategy & chemotherapy with docetaxel VERSUS Performance status guided selection strategy (PS-guided) IN Specific disease- non-small cell lung cancer; Age- 41 to 64 years; Gender- Both; Country- United States.  | 8462    | 9200        | Nelson et al., 2013 (542)    |
| VeriStrat (serum proteomic test) guided strategy & chemotherapy with pemetrexed VERSUS Erlotinib to all IN Specific disease- non-small cell lung cancer; Age- 41 to 64 years; Gender- Both; Country- United States.                                         | 123332  | 130000      | Nelson et al., 2013 (542)    |
| Higher hyperfractionated radiotherapy VERSUS conventional fractionation radiotherapy IN Specific disease- Non–Small-Cell Lung Cancer; Age- Adult; Gender- Not Specified; Country- Netherlands.                                                              | 370368  | 390000      | Ramaekers et al., 2013 (543) |
| Identical hyperfractionated radiotherapy VERSUS conventional fractionation radiotherapy IN Specific disease- Non-Small-Cell Lung Cancer; Age- Adult; Gender- Not Specified; Country- Netherlands.                                                           | 17226   | 18000       | Ramaekers et al., 2013 (543) |
| Very accelerated radiotherapy VERSUS identical hyperfractionated radiotherapy IN Specific disease- Non-Small-Cell Lung Cancer; Age- Adult; Gender- Not Specified; Country- Netherlands.                                                                     | -21013  | Cost-Saving | Ramaekers et al., 2013 (543) |
| Moderately accelerated radiotherapy VERSUS very accelerated radiotherapy IN Specific disease- Non-Small-Cell Lung Cancer; Age- Adult; Gender- Not Specified; Country- Netherlands.                                                                          | 32145   | 34000       | Ramaekers et al., 2013 (543) |

## Melanoma

| Description                                                                                                           | Original US\$/QALY | 2014US\$/QALY | Reference                 |
|-----------------------------------------------------------------------------------------------------------------------|--------------------|---------------|---------------------------|
| Life-long chest X-ray screening VERSUS No screening IN patients with intermediate-thickness, local cutaneous melanoma | 215000             | 320000        | Mooney et al., 1997 (544) |

**Appendix**  
**Cost-Utility Analysis of Cancer Prevention, Treatment, and Control: A Systematic Review**  
**Winn et al.**

|                                                                                                                                                                                                                                                                                                                    |        |        |                              |
|--------------------------------------------------------------------------------------------------------------------------------------------------------------------------------------------------------------------------------------------------------------------------------------------------------------------|--------|--------|------------------------------|
| One-time visual screening examination by a dermatologist VERSUS No screening IN Adults older than 20 yrs. considered to be at high risk of experiencing skin cancer                                                                                                                                                | 30360  | 46000  | Freedberg et al., 1999 (545) |
| Low dose interferon alpha-2a adjuvant therapy VERSUS No treatment IN Patients who have had surgical resection of AJCC stage II primary melanoma (10 yrs study horizon)                                                                                                                                             | 8613   | 13000  | Lafuma et al., 2001 (546)    |
| Low dose interferon alpha-2a adjuvant therapy VERSUS No treatment IN Patients who have had surgical resection of AJCC stage II primary melanoma (5 yrs study horizon)                                                                                                                                              | 16934  | 26000  | Lafuma et al., 2001 (546)    |
| Testing with SLM and treating positives with high-dose adjuvant interferon (IFN) VERSUS Observation only IN Patients with clinical stage II malignant melanoma after surgical excision of their melanoma                                                                                                           | 18700  | 25000  | Wilson et al., 2002 (547)    |
| Low-dose adjuvant interferon (IFN) treatment for all patients VERSUS Testing with SLM and treating positives with high-dose adjuvant interferon (IFN) IN Patients with clinical stage II malignant melanoma after surgical excision of their melanoma                                                              | 57273  | 77000  | Wilson et al., 2002 (547)    |
| Testing with SLM and treating with high or low dose adjuvant interferon based on positive or negative results respectively VERSUS Testing with SLM and treating positives with high-dose adjuvant interferon (IFN) IN Patients with clinical stage II malignant melanoma after surgical excision of their melanoma | 31100  | 42000  | Wilson et al., 2002 (547)    |
| High-dose interferon treatment VERSUS No interferon treatment IN Patients with stage II to III melanoma                                                                                                                                                                                                            | 9426   | 13000  | Crott et al., 2004 (548)     |
| VERSUS IN Patients with malignant melanoma                                                                                                                                                                                                                                                                         | 67727  | 87000  | Dixon et al., 2006 (549)     |
| 1 time melanoma dermatologist visual screening at age 50 years VERSUS Background screening only IN Hypothetical US cohort of the general population                                                                                                                                                                | 8000   | 10000  | Losina et al., 2007 (550)    |
| Melanoma dermatologist visual screening every year starting at age 50 years VERSUS Melanoma dermatologist visual screening every 2 years starting at age 50 years IN Hypothetical US cohort of the general population                                                                                              | 424000 | 530000 | Losina et al., 2007 (550)    |

**Appendix**  
**Cost-Utility Analysis of Cancer Prevention, Treatment, and Control: A Systematic Review**  
**Winn et al.**

|                                                                                                                                                                                                                                                                                                                             |        |        |                            |
|-----------------------------------------------------------------------------------------------------------------------------------------------------------------------------------------------------------------------------------------------------------------------------------------------------------------------------|--------|--------|----------------------------|
| Melanoma dermatologist visual screening every year starting at age 50 years VERSUS Melanoma dermatologist visual screening every 2 years starting at age 50 years IN Hypothetical US cohort of siblings of patients with melanoma                                                                                           | 210000 | 260000 | Losina et al., 2007 (550)  |
| Melanoma dermatologist visual screening every 2 years starting at age 50 years VERSUS 1 time melanoma dermatologist visual screening at age 50 years IN Hypothetical US cohort of siblings of patients with melanoma                                                                                                        | 35500  | 44000  | Losina et al., 2007 (550)  |
| 1 time melanoma dermatologist visual screening at age 50 years VERSUS Background screening only IN Hypothetical US cohort of siblings of patients with melanoma                                                                                                                                                             | 4000   | 5000   | Losina et al., 2007 (550)  |
| 1 time melanoma dermatologist visual screening at age 50 years VERSUS Background screening only IN Hypothetical US cohort of higher risk ( at least 2 first degree relatives having been diagnosed as having melanoma) siblings of patients with melanoma                                                                   | 900    | 1100   | Losina et al., 2007 (550)  |
| Melanoma dermatologist visual screening every 2 years starting at age 50 years VERSUS 1 time melanoma dermatologist visual screening at age 50 years IN Hypothetical US cohort of higher risk ( at least 2 first degree relatives having been diagnosed as having melanoma) siblings of patients with melanoma              | 14700  | 18000  | Losina et al., 2007 (550)  |
| Melanoma dermatologist visual screening every year starting at age 50 years VERSUS Melanoma dermatologist visual screening every 2 years starting at age 50 years IN Hypothetical US cohort of higher risk ( at least 2 first degree relatives having been diagnosed as having melanoma) siblings of patients with melanoma | 99800  | 130000 | Losina et al., 2007 (550)  |
| Adjuvant high dose interferon following surgical treatment VERSUS Surgical treatment, no pharmaceutical adjuvant IN US Node positive stage IIIA melanoma patients                                                                                                                                                           | 169548 | 210000 | Cormier et al., 2007 (551) |
| Adjuvant high dose interferon following surgical treatment VERSUS Surgical treatment, no pharmaceutical adjuvant IN US Node positive stage IIIB melanoma patients                                                                                                                                                           | 95304  | 120000 | Cormier et al., 2007 (551) |
| Adjuvant high dose interferon following surgical treatment VERSUS Surgical treatment, no pharmaceutical adjuvant IN US Node positive stage IIIC melanoma patients                                                                                                                                                           | 76068  | 92000  | Cormier et al., 2007       |

**Appendix**  
**Cost-Utility Analysis of Cancer Prevention, Treatment, and Control: A Systematic Review**  
**Winn et al.**

|                                                                                                                                                                                                                                                                                                                                   |        |        | (551)                     |
|-----------------------------------------------------------------------------------------------------------------------------------------------------------------------------------------------------------------------------------------------------------------------------------------------------------------------------------|--------|--------|---------------------------|
| Wide excision (WEX) with sentinel lymph node biopsy (SNB) VERSUS Wide excision only IN Australian patients with cutaneous melanoma with primary tumors greater than or equal to 1 mm in thickness, 52 years of age                                                                                                                | 1664   | 1900   | Morton et al., 2008 (552) |
| Application of broad-spectrum Sun Protection Factor 15 sunscreen to head neck arms and hands every morning VERSUS Use of sun screen at their own discretion IN White population aged 49 years in sunny settings in Australia                                                                                                      | 45540  | 49000  | Hirst et al., 2012 (553)  |
| Ipilimumab (3mg/kg) VERSUS Standard/Usual care- best supportive care (BSC) IN Specific disease- patients with advanced (unresectable or metastatic) melanoma; Age- Adult; Gender- Both; Country- United States.                                                                                                                   | 128656 | 140000 | Barzey et al., 2013 (554) |
| Mole Mate system- novel diagnostic aid comprising a handheld SIAscopy scanner incorporating an algorithm developed for use in primarycare VERSUS Standard/Usual care- best practice (recommended by NICE) IN Specific disease- Pigmented skin lesions; Age- 41 to 64 years, Adult; Gender- Not Specified; Country- United States. | 3042   | 3200   | Wilson et al., 2013 (555) |
| FISH assay addition, diagnostic strategy 2 VERSUS Secondary microscopic assessment by a pathologist IN Healthy; Age- Adult; Gender- Both; Country- United States.                                                                                                                                                                 | 33000  | 36000  | Kansal et al., 2013 (556) |
| FISH assay addition, diagnostic strategy 1 VERSUS Initial microscopic assessment by a PCP or pathologist IN Healthy; Age- Adult; Gender- Both; Country- United States.                                                                                                                                                            | 14930  | 16000  | Kansal et al., 2013 (556) |
| Vemurafenib VERSUS dacarbazine IN Specific disease- malignant melanoma; Age- 41 to 64 years, >=65 years; Gender- Both; Country- United Kingdom; Other- locally advanced or metastatic BRAF V600 mutation-positive.                                                                                                                | 87085  | 95000  | Beale et al., 2013 (557)  |

## Neck Cancer

| Description                                                                                                                                                                                                                                                                                          | Original<br>US\$/QALY | 2014US\$/QALY                              | Reference                       |
|------------------------------------------------------------------------------------------------------------------------------------------------------------------------------------------------------------------------------------------------------------------------------------------------------|-----------------------|--------------------------------------------|---------------------------------|
| Positron emission tomography VERSUS Observation followed by surgery or radiation IN Classification N0 head and neck squamous cell carcinoma patients after a computed tomography (CT) scan                                                                                                           | 2505                  | 3600                                       | Hollenbeak et al., 2001 (558)   |
| Primary radioactive iodine treatment VERSUS Primary surgery - anti-thyroid drugs (ATDs) followed by thyroid lobectomy once euthyroidism has been achieved IN a 40 year old woman with a single toxic thyroid nodule presenting as clinical hyperthyroidism                                           | -5353                 | Increases<br>Costs,<br>Decreases<br>Health | Vidal-Trecan et al., 2002 (559) |
| Lifelong medical therapy with anti-thyroid drugs (ATDs) followed by thyroid lobectomy VERSUS Primary radioactive iodine treatment IN a 40 year old woman with a single toxic thyroid nodule presenting as clinical hyperthyroidism                                                                   | -1338                 | Increases<br>Costs,<br>Decreases<br>Health | Vidal-Trecan et al., 2002 (559) |
| Lifelong medical therapy with anti-thyroid drugs (ATDs) followed by radioactive iodine treatment VERSUS Anti-thyroid drugs (ATDs) followed by thyroid lobectomy once euthyroidism has been achieved IN a 40 year old woman with a single toxic thyroid nodule presenting as clinical hyperthyroidism | -1701                 | Increases<br>Costs,<br>Decreases<br>Health | Vidal-Trecan et al., 2002 (559) |
| Screening by a dental specialist VERSUS No screening IN Patients with oral lichen planus - average age 55                                                                                                                                                                                            | 2137                  | 2900                                       | van der Meij et al., 2002 (560) |
| Primary low-dose radioactive iodine treatment (<555 MBq) VERSUS Primary high-dose radioactive iodine treatment (>555 MBq) IN Female patients with clinical hyperthyroidism and a toxic solitary thyroid nodule - age 40                                                                              | 31200                 | 41000                                      | Vidal-Trecan et al., 2004 (561) |
| Primary thyroid lobectomy (once euthyroidism has been achieved with antithyroid drugs) VERSUS Primary high-dose radioactive iodine treatment (>555 MBq) IN Female patients with clinical hyperthyroidism and a toxic solitary thyroid nodule - age 40                                                | 11517                 | 15000                                      | Vidal-Trecan et al., 2004 (561) |
| Lifelong anti-thyroid drugs followed by radioactive iodine treatment VERSUS Primary high-dose radioactive iodine treatment (>555 MBq) IN Female patients with clinical hyperthyroidism and a toxic solitary thyroid nodule - age 40                                                                  | -7727                 | Increases<br>Costs,<br>Decreases<br>Health | Vidal-Trecan et al., 2004 (561) |



**Appendix**  
**Cost-Utility Analysis of Cancer Prevention, Treatment, and Control: A Systematic Review**  
**Winn et al.**

|                                                                                                                                                                                                                          |       |                                   |                                 |
|--------------------------------------------------------------------------------------------------------------------------------------------------------------------------------------------------------------------------|-------|-----------------------------------|---------------------------------|
| Lifelong anti-thyroid drugs followed by thyroid lobectomy VERSUS Primary high-dose radioactive iodine treatment (>555 MBq) IN Female patients with clinical hyperthyroidism and a toxic solitary thyroid nodule - age 40 | -7838 | Increases Costs, Decreases Health | Vidal-Trecau et al., 2004 (561) |
| Recombinant human thyroid stimulating hormone VERSUS Thyroid hormone withdrawal IN Patients undergoing diagnosis of recurrent thyroid cancer                                                                             | 33495 | 43000                             | Blamey et al., 2005 (562)       |
| VERSUS IN Patients with newly diagnosed differentiated papillary or follicular thyroid cancer without metastases                                                                                                         | 1192  | 1500                              | Mernagh et al., 2006 (563)      |
| Cetuximab in combination with radiotherapy VERSUS Radiotherapy only IN Advanced head and neck cancer in patients (in Belgium) for whom chemoradiotherapy is inappropriate or intolerable                                 | 10764 | 13000                             | Brown et al., 2008 (564)        |
| Cetuximab in combination with radiotherapy VERSUS Radiotherapy only IN Advanced head and neck cancer in patients (in France) for whom chemoradiotherapy is inappropriate or intolerable                                  | 13613 | 16000                             | Brown et al., 2008 (564)        |
| Cetuximab in combination with radiotherapy VERSUS Radiotherapy only IN Advanced head and neck cancer in patients (in Italy) for whom chemoradiotherapy is inappropriate or intolerable                                   | 9470  | 11000                             | Brown et al., 2008 (564)        |
| Cetuximab in combination with radiotherapy VERSUS Radiotherapy only IN Advanced head and neck cancer in patients (in Switzerland) for whom chemoradiotherapy is inappropriate or intolerable                             | 12975 | 15000                             | Brown et al., 2008 (564)        |
| Cetuximab in combination with radiotherapy VERSUS Radiotherapy only IN Advanced head and neck cancer in patients (in the UK) for whom chemoradiotherapy is inappropriate or intolerable                                  | 11488 | 13000                             | Brown et al., 2008 (564)        |

**Appendix**  
**Cost-Utility Analysis of Cancer Prevention, Treatment, and Control: A Systematic Review**  
**Winn et al.**

|                                                                                                                                                                                                                                                                                                                                                                                                                                                       |        |             |                            |
|-------------------------------------------------------------------------------------------------------------------------------------------------------------------------------------------------------------------------------------------------------------------------------------------------------------------------------------------------------------------------------------------------------------------------------------------------------|--------|-------------|----------------------------|
| 18-Fluoro-2-Deoxyglucose Positron emission tomography (PET scan) of the nasal passages VERSUS Magnetic resonance imaging of the nasal passages IN Southern China and Southeast Asia patients suspected of nasopharyngeal carcinoma. Taiwanese healthcare system.                                                                                                                                                                                      | 1389   | 1600        | Yen et al., 2009 (565)     |
| MRI followed by PET scan if MRI results are uncertain VERSUS Magnetic Resonance Imaging (MRI) scan of the nasal passages IN Southern China and Southeast Asia patients suspected of nasopharyngeal carcinoma. Taiwanese healthcare system.                                                                                                                                                                                                            | 462    | 530         | Yen et al., 2009 (565)     |
| Docetaxel 75 mg/m <sup>2</sup> followed by cisplatin 100 mg/m <sup>2</sup> on day 1 and 5-FU as a continuous infusion at 1000 mg/m <sup>2</sup> per day for 4 days, along with ciprofloxacin 500 mg twice a day for 10 days and dexamethasone 48 mg during each cycle VERSUS Cisplatin 100 mg/m <sup>2</sup> on Day 1 followed by 5-FU 1000 mg/m <sup>2</sup> per day as a continuous infusion for 5 days. IN Head and neck cancer patients in the UK | 3285   | 3900        | Parthan et al., 2009 (566) |
| Recombinant human thyroid stimulating hormone (rhTSH) before radiiodine ablation VERSUS No recombinant human thyroid stimulating hormone (rhTSH) IN Canadian patients with thyroid cancer                                                                                                                                                                                                                                                             | 1435   | 1600        | Mernagh et al., 2009 (567) |
| Recombinant human thyroid stimulating hormone (rhTSH) before radiiodine ablation VERSUS No recombinant human thyroid stimulating hormone (rhTSH) IN Canadian patients with thyroid cancer where ablation performed as outpatient, so no time spent in radio-protective ward                                                                                                                                                                           | 12643  | 14000       | Mernagh et al., 2009 (567) |
| Dissect patients with residual disease on positron emission tomography-computed tomography (PET-CT) VERSUS Dissect all patients IN United States 50 year old men with node-positive head and neck squamous cell carcinoma 5 years post chemoradiotherapy                                                                                                                                                                                              |        | Cost-Saving | Sher et al., 2009 (568)    |
| Recombinant human thyrotropin (rhTSH) VERSUS Thyroid hormone (throxine) withdrawal IN US patients aged 44 years with low-risk differentiated thyroid cancer who were prepared for ablation                                                                                                                                                                                                                                                            | 52554  | 58000       | Wang et al., 2010 (569)    |
| Transoral CO <sub>2</sub> Endolaryngeal laser excision (TOL) VERSUS Standard fractionated external beam radiation IN Adults with early-stage glottic                                                                                                                                                                                                                                                                                                  | -15420 | Cost-Saving | Higgins et al., 2011       |

**Appendix**  
**Cost-Utility Analysis of Cancer Prevention, Treatment, and Control: A Systematic Review**  
**Winn et al.**

|                                                                                                                                                                                                                           |        |             |                             |
|---------------------------------------------------------------------------------------------------------------------------------------------------------------------------------------------------------------------------|--------|-------------|-----------------------------|
| carcinoma                                                                                                                                                                                                                 |        |             | (570)                       |
| Yearly community-based oral cancer screening VERSUS None IN US males over 40 years regularly using tobacco and/or alcohol                                                                                                 | -6239  | Cost-Saving | Dedhia et al., 2011 (571)   |
| Cetuximab plus radiotherapy VERSUS Radiotherapy IN Patients with locally advanced squamous cell carcinoma of the head and neck in Taiwan                                                                                  | 36992  | 42000       | Chan et al., 2011 (572)     |
| Molecular test (Afirma Gene Expression Classifier) VERSUS Current practice based on cytological findings IN US adult patients with thyroid nodules and indeterminate fine needle aspiration biopsy (FNAB) results         | -20757 | Cost-Saving | Li et al., 2011 (573)       |
| Preventative swallowing exercise program (PREP) in addition to usual care VERSUS Usual care IN Patients with advanced stage III and IV head and neck cancer undergoing concomitant chemo-radiotherapy (CCRT)              | 4708   | 5200        | Ret?l et al., 2011 (574)    |
| Addition of docetaxel to cisplatin and platinum/infusional 5-fluorouracil (TPF) VERSUS Chemotherapy plus platinum/infusional 5-fluorouracil (PF) IN Patients with stage III/IV unresectable head and neck cancer in Italy | 15646  | 17000       | Liberato et al., 2012 (575) |
| Intensity modulated radiotherapy (IMRT) VERSUS Three-dimensional conformal radiotherapy (3DCRT) IN Patients with locally advanced oropharyngeal carcinoma undergoing radiotherapy                                         | 4476   | 4900        | Yong et al., 2012 (576)     |
| Volumetric modulated arc therapy (VMAT) VERSUS Three-dimensional conformal radiotherapy (3DCRT) IN Patients with locally advanced oropharyngeal carcinoma undergoing radiotherapy                                         | 2398   | 2600        | Yong et al., 2012 (576)     |
| Cetuximab + platinum-based chemotherapy VERSUS Platinum-based chemotherapy alone IN Patients with recurrent or metastatic head and neck squamous cell carcinoma (HNSCC)                                                   | 390670 | 410000      | Hannouf et al., 2012 (577)  |
| Repeat fine-needle aspiration (FNA) VERSUS Diagnostic thyroid lobectomy IN US patients aged 40 years with diagnosis of atypia of undetermined significance (AUS) on initial thyroid fine-needle aspiration (FNA)          | -97287 | Cost-Saving | Heller et al., 2012 (578)   |

**Appendix**  
**Cost-Utility Analysis of Cancer Prevention, Treatment, and Control: A Systematic Review**  
**Winn et al.**

|                                                                                                                                                                                                                                                                                                                                                    |         |                                   |                               |
|----------------------------------------------------------------------------------------------------------------------------------------------------------------------------------------------------------------------------------------------------------------------------------------------------------------------------------------------------|---------|-----------------------------------|-------------------------------|
| Fine-needle aspiration biopsy (FNAB) with a new molecular diagnostic test as an addition (DX) VERSUS FNAB in combination with the the Bethesda System for reporting thyroid cytopathology guidelines IN Patients with an initial indeterminate fine-needle aspiration biopsy for evaluating thyroid nodules through cytological diagnosis          | -27000  | Cost-Saving                       | Najafzadeh et al., 2012 (579) |
| Intensity modulated proton radiation therapy (IMPT) if efficient (receive if IMPT is cost-effective compared to IMRT, below 80,000 per QALY gained) VERSUS Intensity modulated radiation therapy with photons (IMRT) for all patients IN Specific disease- Advanced head and neck cancer; Age- Adult; Gender- Not Specified; Country- Netherlands. | 79774   | 87000                             | Ramaekers et al., 2013 (580)  |
| Intensity modulated proton radiation therapy (IMPT) for all patients VERSUS Intensity modulated proton radiation therapy (IMPT) if efficient (receive if IMPT is cost-effective compared to IMRT, below 80,000 per QALY gained) IN Specific disease- Advanced head and neck cancer; Age- Adult; Gender- Not Specified; Country- Netherlands.       | 169328  | 180000                            | Ramaekers et al., 2013 (580)  |
| Fine needle aspiration (FNA) with on-site adequacy evaluation VERSUS Fine needle aspiration (FNA) without on-site adequacy evaluation IN Specific disease- solitary thyroid nodule; Age- Unknown; Gender- Not Specified; Country- United States.                                                                                                   | 639143  | 670000                            | Zanocco et al., 2013 (581)    |
| Sentinel lymph node (SLN) procedure followed by neck dissection or watchful waiting VERSUS Elective neck dissection IN Specific disease- Clinical T1-2N0 oral squamous cell cancer; Age- Unknown; Gender- Both; Country- Netherlands.                                                                                                              | 4670    | 4900                              | Govers et al., 2013 (582)     |
| Gene expression VERSUS Elective neck dissection IN Specific disease- Clinical T1-2N0 oral squamous cell cancer; Age- Unknown; Gender- Both; Country- Netherlands.                                                                                                                                                                                  | -749713 | Increases Costs, Decreases Health | Govers et al., 2013 (582)     |
| Gene expression and sentinel node VERSUS Elective neck dissection IN Specific disease- Clinical T1-2N0 oral squamous cell cancer; Age- Unknown; Gender- Both; Country- Netherlands.                                                                                                                                                                | 5415557 | 5700000                           | Govers et al., 2013 (582)     |
| Gene expression VERSUS Sentinel node IN Specific disease- Clinical T1-2N0 oral squamous cell cancer; Age- Unknown; Gender- Both; Country- Netherlands.                                                                                                                                                                                             | -130671 | Increases Costs, Decreases Health | Govers et al., 2013 (582)     |

**Appendix**  
**Cost-Utility Analysis of Cancer Prevention, Treatment, and Control: A Systematic Review**  
**Winn et al.**

|                                                                                                                                                                                                                                                                     |         |                                   |                            |
|---------------------------------------------------------------------------------------------------------------------------------------------------------------------------------------------------------------------------------------------------------------------|---------|-----------------------------------|----------------------------|
| Sentinel node VERSUS Elective neck dissection IN Specific disease- Clinical T1-2N0 oral squamous cell cancer; Age- Unknown; Gender- Both; Country- Netherlands.                                                                                                     | 4670    | 4900                              | Govers et al., 2013 (582)  |
| Gene expression plus sentinel node VERSUS sentinel node IN Specific disease- Clinical T1-2N0 oral squamous cell cancer; Age- Unknown; Gender- Both; Country- Netherlands.                                                                                           | -178782 | Increases Costs, Decreases Health | Govers et al., 2013 (582)  |
| Elective neck dissection VERSUS Watchful waiting IN Specific disease- Clinical T1-2N0 oral squamous cell cancer; Age- Unknown; Gender- Both; Country- Netherlands.                                                                                                  | 9036    | 9500                              | Govers et al., 2013 (582)  |
| Diagnostic hemithyroidectomy with intraoperative pathology examination VERSUS Diagnostic hemithyroidectomy IN Healthy; Age- Adult; Gender- Both; Country- United States.                                                                                            | -47480  | Increases Costs, Decreases Health | Zanocco et al., 2013 (583) |
| Total thyroidectomy VERSUS Diagnostic hemithyroidectomy IN Healthy; Age- Adult; Gender- Both; Country- United States.                                                                                                                                               | -12530  | Increases Costs, Decreases Health | Zanocco et al., 2013 (583) |
| Minimally invasive esophagectomy VERSUS Open esophagectomy IN Specific disease- resectable esophageal cancer; Age- Adult; Gender- Both; Country- Canada.                                                                                                            | -74645  | Cost-Saving                       | Lee et al., 2013 (584)     |
| Intensity modulated radiation therapy VERSUS 3-dimensional conformal Radiation therapy IN Specific disease- head/neck cancer; Age- >=65 years; Gender- Not Specified; Country- United States.                                                                       | 34523   | 36000                             | Kohler et al., 2013 (585)  |
| Total thyroidectomy (TTX) with prophylactic central neck dissection (pCND) VERSUS Total thyroidectomy (TTX) IN Specific disease- Thyroid Cancer afer total thyroidectomy (TTX); Age- 19 to 40 years, 41 to 64 years; Gender- Not Specified; Country- United States. | -27667  | Increases Costs, Decreases Health | Zanocco et al., 2013 (586) |

## Other Cancers

| Description                                                                                                                                                                                                             | Original US\$/QALY | 2014US\$/QALY | Reference                  |
|-------------------------------------------------------------------------------------------------------------------------------------------------------------------------------------------------------------------------|--------------------|---------------|----------------------------|
| Vena caval filter VERSUS Anticoagulation therapy IN Lung cancer patients who have survived acute pulmonary embolism                                                                                                     | -21500             | Cost-Saving   | Sarasin et al., 1993 (587) |
| Anticoagulation therapy VERSUS Observation IN Lung cancer patients with acute deep venous thrombosis                                                                                                                    | -6638              | Cost-Saving   | Sarasin et al., 1993 (587) |
| Vena caval filter VERSUS Anticoagulation therapy IN Lung cancer patients with acute deep venous thrombosis                                                                                                              | -13050             | Cost-Saving   | Sarasin et al., 1993 (587) |
| Anticoagulation therapy VERSUS Observation IN Lung cancer patients who have survived acute pulmonary embolism                                                                                                           | -9647              | Cost-Saving   | Sarasin et al., 1993 (587) |
| Antiemetic therapy with ondansetron VERSUS Antiemetic therapy with metoclopramide IN 40-kg patient receiving cisplatin chemotherapy ( $\geq 75$ mg/ sq. m) who had not previously been exposed to antineoplastic agents | 168391             | 280000        | Zbrozek et al., 1994 (588) |
| Antiemetic therapy with ondansetron VERSUS Antiemetic therapy with metoclopramide IN 70-kg patient receiving cisplatin chemotherapy ( $\geq 75$ mg/ sq. m) who had not previously been exposed to antineoplastic agents | 407667             | 670000        | Zbrozek et al., 1994 (588) |
| Semiannual Pap smear VERSUS Annual Pap smear after 2 negative smears 6 months apart IN Women with HIV infection, CD4 cell count $< 200$ cells/mm <sup>3</sup>                                                           | 43700              | 66000         | Goldie et al., 1999 (589)  |
| Annual Pap smear VERSUS No screen IN Women with HIV infection, CD4 cell count 200-500 cells/mm <sup>3</sup>                                                                                                             | 12800              | 19000         | Goldie et al., 1999 (589)  |
| Annual Pap smear VERSUS No screen IN Women with HIV infection, CD4 cell count $< 200$ cells/mm <sup>3</sup>                                                                                                             | 22500              | 34000         | Goldie et al., 1999 (589)  |
| Annual Pap smear after 2 negative smears 6 months apart VERSUS Annual Pap smear IN Women with HIV infection, CD4 cell count 200-500 cells/mm <sup>3</sup>                                                               | 14800              | 22000         | Goldie et al., 1999 (589)  |
| Annual Pap smear after 2 negative smears 6 months apart VERSUS Annual Pap smears IN Women with HIV infection, CD4 cell count $> 500$ cells/mm <sup>3</sup>                                                              | 15800              | 24000         | Goldie et al., 1999 (589)  |

**Appendix**  
**Cost-Utility Analysis of Cancer Prevention, Treatment, and Control: A Systematic Review**  
**Winn et al.**

|                                                                                                                                                               |        |                                   |                           |
|---------------------------------------------------------------------------------------------------------------------------------------------------------------|--------|-----------------------------------|---------------------------|
| Annual Pap smear after 2 negative smears 6 months apart VERSUS Annual Pap smears IN Women with HIV infection, CD4 cell count <200 cells/mm <sup>3</sup>       | 28700  | 43000                             | Goldie et al., 1999 (589) |
| Semiannual Pap smear VERSUS Annual Pap smear after 2 negative smears 6 months apart IN Women with HIV infection, CD4 cell count 200-500 cells/mm <sup>3</sup> | 27600  | 42000                             | Goldie et al., 1999 (589) |
| Semiannual Pap smear VERSUS Annual Pap smear after 2 negative smears 6 months apart IN Women with HIV infection, CD4 cell count >500 cells/mm <sup>3</sup>    | 40300  | 61000                             | Goldie et al., 1999 (589) |
| Semiannual colposcopy VERSUS Semiannual Pap smear IN Women with HIV infection, CD4 cell count 200-500 cells/mm <sup>3</sup>                                   | 375000 | 570000                            | Goldie et al., 1999 (589) |
| Semiannual colposcopy VERSUS Semiannual Pap smear IN Women with HIV infection, CD4 cell count >500 cells/mm <sup>3</sup>                                      | 540000 | 810000                            | Goldie et al., 1999 (589) |
| Semiannual colposcopy VERSUS Semiannual Pap smear IN Women with HIV infection, CD4 cell count <200 cells/mm <sup>3</sup>                                      | 448000 | 680000                            | Goldie et al., 1999 (589) |
| Annual Pap smear VERSUS No screen IN Women with HIV infection, CD4 cell count >500 cells/mm <sup>3</sup>                                                      | 12800  | 19000                             | Goldie et al., 1999 (589) |
| Anal PAP screening every 3 years VERSUS No screening IN HIV positive homosexual and bisexual men with CD4 count >500                                          |        | Increases Costs, Decreases Health | Goldie et al., 1999 (590) |
| Anal PAP screening every 2 years VERSUS No screening IN HIV positive homosexual and bisexual men with CD4 count >500                                          | 13000  | 19000                             | Goldie et al., 1999 (590) |
| Anal PAP screening every year VERSUS Anal PAP screening every 2 years IN HIV positive homosexual and bisexual men with CD4 count >500                         | 16600  | 24000                             | Goldie et al., 1999 (590) |
| Anal PAP screening every 6 months VERSUS Anal PAP screening every year IN HIV positive homosexual and bisexual men with CD4 count >500                        | 49600  | 73000                             | Goldie et al., 1999 (590) |
| Anal PAP screening every 3 years VERSUS No screening IN HIV positive homosexual and bisexual men with CD4 count 200-500                                       |        | Increases Costs, Decreases Health | Goldie et al., 1999 (590) |
| Anal PAP screening every 2 years VERSUS No screening IN HIV positive homosexual and bisexual men with CD4 count 200-500                                       |        | Increases Costs, Decreases        | Goldie et al., 1999 (590) |

**Appendix**  
**Cost-Utility Analysis of Cancer Prevention, Treatment, and Control: A Systematic Review**  
**Winn et al.**

|                                                                                                                                           |         | Health                            |                             |
|-------------------------------------------------------------------------------------------------------------------------------------------|---------|-----------------------------------|-----------------------------|
| Anal PAP screening every year VERSUS Anal PAP screening every 2 years IN HIV positive homosexual and bisexual men with CD4 count 200-500  | 23800   | 35000                             | Goldie et al., 1999 (590)   |
| Anal PAP screening every 6 months VERSUS Anal PAP screening every year IN HIV positive homosexual and bisexual men with CD4 count 200-500 | 54300   | 80000                             | Goldie et al., 1999 (590)   |
| Anal PAP screening every 6 months VERSUS Anal PAP screening every year IN HIV positive homosexual and bisexual men with CD4 count <200    | 91100   | 130000                            | Goldie et al., 1999 (590)   |
| Anal PAP screening every year VERSUS Anal PAP screening every 2 years IN HIV positive homosexual and bisexual men with CD4 count <200     | 57100   | 84000                             | Goldie et al., 1999 (590)   |
| Anal PAP screening every 2 years VERSUS Anal PAP screening every 3 years IN HIV positive homosexual and bisexual men with CD4 count <200  | 51400   | 76000                             | Goldie et al., 1999 (590)   |
| Anal PAP screening every 3 years VERSUS No screening IN HIV positive homosexual and bisexual men with CD4 count <200                      | 49300   | 73000                             | Goldie et al., 1999 (590)   |
| Recombinant human erythropoietin (epoetin) VERSUS Blood transfusions IN Anemic patients with cancer undergoing chemotherapy               | 163080  | 240000                            | Cremieux et al., 1999 (591) |
| Medullary hormone analysis VERSUS Ignore IN Patients with signs of adrenal incidentaloma (2.5-cm incidentaloma)                           | 22400   | 33000                             | Kievit et al., 2000 (592)   |
| Fine-needle aspiration cytology VERSUS Medullary hormone analysis IN Patients with signs of adrenal incidentaloma (2.5-cm incidentaloma)  | -17000  | Increases Costs, Decreases Health | Kievit et al., 2000 (592)   |
| Cortical hormone analysis VERSUS Fine-needle aspiration cytology IN Patients with signs of adrenal incidentaloma (2.5-cm incidentaloma)   | -290000 | Increases Costs, Decreases Health | Kievit et al., 2000 (592)   |
| Full hormone analysis VERSUS Cortical hormone analysis IN Patients with signs of adrenal incidentaloma (2.5-cm incidentaloma)             | 22500   | 33000                             | Kievit et al., 2000 (592)   |
| Meta-iodobenzylguanidine VERSUS Full hormone analysis IN Patients with signs of adrenal incidentaloma (2.5-cm incidentaloma)              | -40000  | Increases Costs, Decreases        | Kievit et al., 2000 (592)   |



**Appendix**  
**Cost-Utility Analysis of Cancer Prevention, Treatment, and Control: A Systematic Review**  
**Winn et al.**

|                                                                                                                                              |       | Health                               |                           |
|----------------------------------------------------------------------------------------------------------------------------------------------|-------|--------------------------------------|---------------------------|
| I-iodomethyl-norcholesterol VERSUS Meta-iodobenzylguanidine IN Patients with signs of adrenal incidentaloma (2.5-cm incidentaloma)           | -7222 | Increases Costs,<br>Decreases Health | Kievit et al., 2000 (592) |
| Magnetic resonance imaging (MRI) VERSUS I-iodomethyl-norcholesterol IN Patients with signs of adrenal incidentaloma (2.5-cm incidentaloma)   | 22500 | 33000                                | Kievit et al., 2000 (592) |
| Computed tomography (CT) scan VERSUS Magnetic resonance imaging (MRI) IN Patients with signs of adrenal incidentaloma (2.5-cm incidentaloma) |       | Increases Costs,<br>Decreases Health | Kievit et al., 2000 (592) |
| Surgery (no testing) VERSUS Computed tomography (CT) scan IN Patients with signs of adrenal incidentaloma (2.5-cm incidentaloma)             |       | Increases Costs,<br>Decreases Health | Kievit et al., 2000 (592) |
| Medullary hormone analysis VERSUS Ignore IN Patients with signs of adrenal incidentaloma (6-cm incidentaloma)                                | 17450 | 25000                                | Kievit et al., 2000 (592) |
| Fine-needle aspiration cytology VERSUS Medullary hormone analysis IN Patients with signs of adrenal incidentaloma (6-cm incidentaloma)       |       | Increases Costs,<br>Decreases Health | Kievit et al., 2000 (592) |
| Meta-iodobenzylguanidine VERSUS Fine-needle aspiration cytology IN Patients with signs of adrenal incidentaloma (6-cm incidentaloma)         |       | Increases Costs,<br>Decreases Health | Kievit et al., 2000 (592) |
| Cortical hormone analysis VERSUS Meta-iodobenzylguanidine IN Patients with signs of adrenal incidentaloma (6-cm incidentaloma)               |       | Increases Costs,<br>Decreases Health | Kievit et al., 2000 (592) |
| I-iodomethylnorcholesterol VERSUS Cortical hormone analysis IN Patients with signs of adrenal incidentaloma (6-cm incidentaloma)             |       | Increases Costs,<br>Decreases Health | Kievit et al., 2000 (592) |

**Appendix**  
**Cost-Utility Analysis of Cancer Prevention, Treatment, and Control: A Systematic Review**  
**Winn et al.**

|                                                                                                                                                                                                                                                    |        |                                   |                                 |
|----------------------------------------------------------------------------------------------------------------------------------------------------------------------------------------------------------------------------------------------------|--------|-----------------------------------|---------------------------------|
| Full hormone analysis VERSUS I-iodomethylnorcholesterol IN Patients with signs of adrenal incidentaloma (6-cm incidentaloma)                                                                                                                       | 47000  | 68000                             | Kievit et al., 2000 (592)       |
| Magnetic resonance imaging (MRI) VERSUS Full hormone analysis IN Patients with signs of adrenal incidentaloma (6-cm incidentaloma)                                                                                                                 |        | Increases Costs, Decreases Health | Kievit et al., 2000 (592)       |
| Computed tomography (CT) scan VERSUS Magnetic resonance imaging (MRI) IN Patients with signs of adrenal incidentaloma (6-cm incidentaloma)                                                                                                         |        | Increases Costs, Decreases Health | Kievit et al., 2000 (592)       |
| Surgery (no testing) VERSUS Computed tomography (CT) scan IN Patients with signs of adrenal incidentaloma (6-cm incidentaloma)                                                                                                                     |        | Increases Costs, Decreases Health | Kievit et al., 2000 (592)       |
| Screening for anal squamous intraepithelial lesions and anal cancer every 3 years VERSUS No screening IN Hypothetical cohort of 30yo HIV negative homosexual and bisexual men                                                                      | 7000   | 10000                             | Goldie et al., 2000 (593)       |
| Screening for anal squamous intraepithelial lesions and anal cancer every 2 years VERSUS Screening for anal squamous intraepithelial lesions and anal cancer every 3 years IN Hypothetical cohort of 30yo HIV negative homosexual and bisexual men | 15100  | 22000                             | Goldie et al., 2000 (593)       |
| Screening for anal squamous intraepithelial lesions and anal cancer every 1 year VERSUS Screening for anal squamous intraepithelial lesions and anal cancer every 2 years IN Hypothetical cohort of 30yo HIV negative homosexual and bisexual men  | 34800  | 51000                             | Goldie et al., 2000 (593)       |
| Screening for anal squamous intraepithelial lesions and anal cancer every 6 months VERSUS Screening for anal squamous intraepithelial lesions and anal cancer every 1 year IN Hypothetical cohort of 30yo HIV negative homosexual and bisexual men | 143500 | 210000                            | Goldie et al., 2000 (593)       |
| Single-fraction radiotherapy VERSUS Multiple-fraction radiotherapy (6 fractions of 4 Gy) IN Cancer patients in the Netherlands with painful bone metastases from solid tumors                                                                      | -53121 | Cost-Saving                       | van den Hout et al., 2003 (594) |

**Appendix**  
**Cost-Utility Analysis of Cancer Prevention, Treatment, and Control: A Systematic Review**  
**Winn et al.**

|                                                                                                                                                                                                                                                                                 |        |        |                                 |
|---------------------------------------------------------------------------------------------------------------------------------------------------------------------------------------------------------------------------------------------------------------------------------|--------|--------|---------------------------------|
| Rapid magnetic resonance (MR) imaging VERSUS Lumbar x-ray IN A hypothetical cohort of primary care patients with low back pain (LBP) referred for imaging to exclude cancer as the cause of their pain                                                                          | 296176 | 400000 | Hollingworth et al., 2003 (595) |
| Palliative radiotherapy for bone metastases VERSUS *No comparator explicitly stated (no palliative treatment?) IN Cancer patients in Australia treated by radiation with palliative intent for bone metastases                                                                  | 939    | 1400   | Barton et al., 2003 (596)       |
| Subcutaneous low molecular weight heparin VERSUS Warfarin (6 months) with low molecular weight heparin (first 5 days) IN Cancer patients who experienced a venous thromboembolic event - age 65                                                                                 | 149865 | 200000 | Aujesky et al., 2005 (597)      |
| Gamma knife radiosurgery VERSUS None IN Patients aged between 20 - 65 years with benign cranial base tumors                                                                                                                                                                     | 3762   | 4700   | Cho et al., 2006 (598)          |
| Open surgery VERSUS None IN Patients aged between 20 - 65 years with benign cranial base tumors                                                                                                                                                                                 | 8996   | 11000  | Cho et al., 2006 (598)          |
| VERSUS IN Cancer patients with indications for anticoagulation for 6 months                                                                                                                                                                                                     | 11398  | 14000  | Dranitsaris et al., 2006 (599)  |
| VERSUS IN Patients with Type II Diabetes, hypertension and in remission with variety of cancers                                                                                                                                                                                 | 398    | 500    | Graves et al., 2006 (600)       |
| VERSUS IN Patients received cisplatin based chemotherapy and received at least one dose of study drug                                                                                                                                                                           | 35935  | 45000  | Lordick et al., 2007 (601)      |
| Three-drug regimen consisting of aprepitant, a 5HT-3 antagonist, and a corticosteroid VERSUS Standard regimen IN Patients receiving a chemotherapeutic regimen including 70 mg/m <sup>2</sup> or less of cisplatin                                                              | 97429  | 120000 | Moore et al., 2007 (602)        |
| Adding aprepitant to the conventional regimen only after chemotherapy-induced nausea and vomiting (CINV) occurs with a prior cycle of chemotherapy VERSUS Standard regimen IN Patients receiving a chemotherapeutic regimen including 70 mg/m <sup>2</sup> or less of cisplatin | 96333  | 120000 | Moore et al., 2007 (602)        |

**Appendix**  
**Cost-Utility Analysis of Cancer Prevention, Treatment, and Control: A Systematic Review**  
**Winn et al.**

|                                                                                                                                                                                                                                                                                                                                                      |         |             |                                 |
|------------------------------------------------------------------------------------------------------------------------------------------------------------------------------------------------------------------------------------------------------------------------------------------------------------------------------------------------------|---------|-------------|---------------------------------|
| Three-drug regimen consisting of aprepitant, a 5HT-3 antagonist, and a corticosteroid VERSUS Adding aprepitant to the conventional regimen only after chemotherapy-induced nausea and vomiting (CINV) occurs with a prior cycle of chemotherapy IN Patients receiving a chemotherapeutic regimen including 70 mg/m <sup>2</sup> or less of cisplatin | 98250   | 120000      | Moore et al., 2007 (602)        |
| Aprepitant VERSUS Standard treatment IN Patients with cancer receiving highly emetogenic chemotherapy (HEC), trial - based                                                                                                                                                                                                                           | -27387  | Cost-Saving | Annemans et al., 2007 (603)     |
| Aprepitant VERSUS Standard treatment IN Patients with cancer receiving highly emetogenic chemotherapy (HEC), real-life based                                                                                                                                                                                                                         | -31122  | Cost-Saving | Annemans et al., 2007 (603)     |
| Aprepitant VERSUS Standard treatment IN Patients with moderately emetogenic chemotherapy (MEC), trial based                                                                                                                                                                                                                                          | -1601   | Cost-Saving | Annemans et al., 2007 (603)     |
| Aprepitant VERSUS Standard treatment IN Patients with moderately emetogenic chemotherapy (MEC), real-life-based                                                                                                                                                                                                                                      | -1956   | Cost-Saving | Annemans et al., 2007 (603)     |
| Controlled and maintained physical exercise at recommended frequencies VERSUS No physical exercise IN Persons 30 years old with: BMI=26, cholesterol=190, systolic blood pressure=120                                                                                                                                                                | 17314   | 22000       | Annemans et al., 2007 (604)     |
| Controlled and maintained physical exercise at recommended frequencies VERSUS No physical exercise IN Persons 40 years old with: BMI=30, cholesterol=210, systolic blood pressure=250                                                                                                                                                                | 11631   | 15000       | Annemans et al., 2007 (604)     |
| Controlled and maintained physical exercise at recommended frequencies VERSUS No physical exercise IN Persons 50 years old with: BMI=32, cholesterol=250, systolic blood pressure=140                                                                                                                                                                | 2922    | 3700        | Annemans et al., 2007 (604)     |
| Prophylactic pegfilgrastim (6mg) VERSUS No prophylactic G-CSF (granulocyte colony-stimulating factor) IN Hospitalized patients (ages 18-65 years old) for a solid tumor cancer with a diagnosis of neutropenia (agranulocytosis)                                                                                                                     | -692025 | Cost-Saving | Eldar-Lissai et al., 2008 (605) |

**Appendix**  
**Cost-Utility Analysis of Cancer Prevention, Treatment, and Control: A Systematic Review**  
**Winn et al.**

|                                                                                                                                                                                                                |          |                                   |                                 |
|----------------------------------------------------------------------------------------------------------------------------------------------------------------------------------------------------------------|----------|-----------------------------------|---------------------------------|
| Prophylactic pegfilgrastim (6mg) VERSUS Prophylactic filgrastim (300 mg and 480 mg) IN Hospitalized patients (ages 18-65 years old) for a solid tumor cancer with a diagnosis of neutropenia (agranulocytosis) | -3023416 | Cost-Saving                       | Eldar-Lissai et al., 2008 (605) |
| Annual screening test for anal intra-epithelial neoplasia (AIN) and anal cancer VERSUS No screening IN UK population of men who have sex with men (MSM) ages 16-24                                             | -306618  | Increases Costs, Decreases Health | Karnon et al., 2008 (606)       |
| VERSUS No screening IN UK population of men who have sex with men (MSM) ages 16-24                                                                                                                             | -28      | Increases Costs, Decreases Health | Karnon et al., 2008 (606)       |
| Screening test for anal intra-epithelial neoplasia (AIN) and anal cancer every 3 years VERSUS No screening IN UK population of men who have sex with men (MSM) ages 16-24                                      | -261878  | Increases Costs, Decreases Health | Karnon et al., 2008 (606)       |
| Screening test for anal intra-epithelial neoplasia (AIN) and anal cancer every 4 years VERSUS No screening IN UK population of men who have sex with men (MSM) ages 16-24                                      | -259005  | Increases Costs, Decreases Health | Karnon et al., 2008 (606)       |
| Screening test for anal intra-epithelial neoplasia (AIN) and anal cancer every 5 years VERSUS No screening IN UK population of men who have sex with men (MSM) ages 16-24                                      | -16391   | Increases Costs, Decreases Health | Karnon et al., 2008 (606)       |
| Annual screening test for anal intra-epithelial neoplasia (AIN) and anal cancer VERSUS No screening IN UK population of men with HIV ages 16-24                                                                | -111724  | Increases Costs, Decreases Health | Karnon et al., 2008 (606)       |
| Screening test for anal intra-epithelial neoplasia (AIN) and anal cancer every 2 years VERSUS No screening IN UK population of men with HIV ages 16-24                                                         | -113758  | Increases Costs, Decreases Health | Karnon et al., 2008 (606)       |
| Screening test for anal intra-epithelial neoplasia (AIN) and anal cancer every 3 years VERSUS No screening IN UK population of men with HIV ages 16-24                                                         | -115226  | Increases Costs, Decreases Health | Karnon et al., 2008 (606)       |

**Appendix**  
**Cost-Utility Analysis of Cancer Prevention, Treatment, and Control: A Systematic Review**  
**Winn et al.**

|                                                                                                                                                                                                                                                                                                                                                                                                     |         |                                   |                           |
|-----------------------------------------------------------------------------------------------------------------------------------------------------------------------------------------------------------------------------------------------------------------------------------------------------------------------------------------------------------------------------------------------------|---------|-----------------------------------|---------------------------|
| Screening test for anal intra-epithelial neoplasia (AIN) and anal cancer every 4 years VERSUS No screening IN UK population of men with HIV ages 16-24                                                                                                                                                                                                                                              | -115115 | Increases Costs, Decreases Health | Karnon et al., 2008 (606) |
| Screening test for anal intra-epithelial neoplasia (AIN) and anal cancer every 5 years VERSUS No screening IN UK population of men with HIV ages 16-24                                                                                                                                                                                                                                              | -114588 | Increases Costs, Decreases Health | Karnon et al., 2008 (606) |
| EPO(epoetin alfa) starting at hemoglobin level 12g/dl VERSUS Red blood cell transfusion treatment (RBCT) alone with a trigger of 10g/dl IN Patients with cancer who developed chemotherapy-related anemia in Sweden                                                                                                                                                                                 | 33865   | 39000                             | Borg et al., 2008 (607)   |
| 30Gy of radiation divided in 10 fractions VERSUS 8Gy radiation in single fraction IN Patients enrolled in clinical trial RTOG97-14 with bone metastases                                                                                                                                                                                                                                             | 6975    | 7700                              | Konski et al., 2009 (608) |
| Lipid screening at 7-year intervals VERSUS No screening IN A hypothetical cohort of 30-year-old male survivors of Hodgkin's Lymphoma(HL) who survived 5 years after mediastinal irradiation. It was assumed that survivors of HL did not have pre-existing clinical CHD and that the incidence of hyperlipidemia in survivors of HL was similar to that for the age- and sex-matched US population. | 22700   | 27000                             | Chen et al., 2009 (609)   |

**Appendix**  
**Cost-Utility Analysis of Cancer Prevention, Treatment, and Control: A Systematic Review**  
**Winn et al.**

|                                                                                                                                                                                                                                                                                                                                                                                                                                    |       |       |                         |
|------------------------------------------------------------------------------------------------------------------------------------------------------------------------------------------------------------------------------------------------------------------------------------------------------------------------------------------------------------------------------------------------------------------------------------|-------|-------|-------------------------|
| <p>Lipid screening at 5-year intervals VERSUS Lipid screening at 7-year intervals IN A hypothetical cohort of 30-year-old male survivors of Hodgkin's Lymphoma(HL) who survived 5 years after mediastinal irradiation. It was assumed that survivors of HL did not have pre-existing clinical CHD and that the incidence of hyperlipidemia in survivors of HL was similar to that for the age- and sex-matched US population.</p>  | 31700 | 37000 | Chen et al., 2009 (609) |
| <p>Lipid screening at 3-year intervals VERSUS Lipid screening at 5-year intervals IN A hypothetical cohort of 30-year-old male survivors of Hodgkin's Lymphoma(HL) who survived 5 years after mediastinal irradiation. It was assumed that survivors of HL did not have pre-existing clinical CHD and that the incidence of hyperlipidemia in survivors of HL was similar to that for the age- and sex-matched US population.</p>  | 78200 | 92000 | Chen et al., 2009 (609) |
| <p>Lipid screening at 1-year intervals VERSUS Lipid screening at 3-year intervals IN A hypothetical cohort of 30-year-old male survivors of Hodgkin's Lymphoma (HL) who survived 5 years after mediastinal irradiation. It was assumed that survivors of HL did not have pre-existing clinical CHD and that the incidence of hyperlipidemia in survivors of HL was similar to that for the age- and sex-matched US population.</p> | 73171 | 86000 | Chen et al., 2009 (609) |

**Appendix**  
**Cost-Utility Analysis of Cancer Prevention, Treatment, and Control: A Systematic Review**  
**Winn et al.**

|                                                                                                                                                                                                                                                                                                                                                                                                                                      |       |       |                         |
|--------------------------------------------------------------------------------------------------------------------------------------------------------------------------------------------------------------------------------------------------------------------------------------------------------------------------------------------------------------------------------------------------------------------------------------|-------|-------|-------------------------|
| <p>Lipid screening at 7-year intervals VERSUS No screening IN A hypothetical cohort of 30-year-old female survivors of Hodgkin's Lymphoma (HL) who survived 5 years after mediastinal irradiation. It was assumed that survivors of HL did not have pre-existing clinical CHD and that the incidence of hyperlipidemia in survivors of HL was similar to that for the age- and sex-matched US population.</p>                        | 27000 | 32000 | Chen et al., 2009 (609) |
| <p>Lipid screening at 5-year intervals VERSUS Lipid screening at 7-year intervals IN A hypothetical cohort of 30-year-old female survivors of Hodgkin's Lymphoma (HL) who survived 5 years after mediastinal irradiation. It was assumed that survivors of HL did not have pre-existing clinical CHD and that the incidence of hyperlipidemia in survivors of HL was similar to that for the age- and sex-matched US population.</p> | 42800 | 50000 | Chen et al., 2009 (609) |
| <p>Lipid screening at 3-year intervals VERSUS Lipid screening at 5-year intervals IN A hypothetical cohort of 30-year-old female survivors of Hodgkin's Lymphoma (HL) who survived 5 years after mediastinal irradiation. It was assumed that survivors of HL did not have pre-existing clinical CHD and that the incidence of hyperlipidemia in survivors of HL was similar to that for the age- and sex-matched US population.</p> | 36145 | 42000 | Chen et al., 2009 (609) |



**Appendix**  
**Cost-Utility Analysis of Cancer Prevention, Treatment, and Control: A Systematic Review**  
**Winn et al.**

|                                                                                                                                                                                                                                                                                                                                                                                                                               |        |                                      |                               |
|-------------------------------------------------------------------------------------------------------------------------------------------------------------------------------------------------------------------------------------------------------------------------------------------------------------------------------------------------------------------------------------------------------------------------------|--------|--------------------------------------|-------------------------------|
| Lipid screening at 1-year intervals VERSUS Lipid screening at 3-year intervals IN A hypothetical cohort of 30-year-old female survivors of Hodgkin's Lymphoma (HL) who survived 5 years after mediastinal irradiation. It was assumed that survivors of HL did not have pre-existing clinical CHD and that the incidence of hyperlipidemia in survivors of HL was similar to that for the age- and sex-matched US population. | 212121 | 250000                               | Chen et al., 2009 (609)       |
| Pleurx catheter for home-based drainage of effusions VERSUS Chest tube placement with talc slurry IN US patients with malignant pleural effusions                                                                                                                                                                                                                                                                             | -18620 | Increases Costs,<br>Decreases Health | Olden et al., 2010 (610)      |
| Erythropoiesis-stimulating agent (ESA), dose: 22191U/week VERSUS Supportive transfusions IN Canadian cancer patients with anemia. Target Hemoglobin <= 12g/dL                                                                                                                                                                                                                                                                 | 96001  | 110000                               | Klarenbach et al., 2010 (611) |
| Erythropoiesis-stimulating agent (ESA), dose: 17673U/week VERSUS Supportive transfusions IN Canadian cancer patients with anemia. Target Hemoglobin <= 12g/dL                                                                                                                                                                                                                                                                 | 67846  | 75000                                | Klarenbach et al., 2010 (611) |
| Erythropoiesis-stimulating agent (ESA), dose: 29502U/week VERSUS Supportive transfusions IN Canadian cancer patients with anemia with an initial Hemoglobin >10g/dL                                                                                                                                                                                                                                                           | 141006 | 160000                               | Klarenbach et al., 2010 (611) |
| Erythropoiesis-stimulating agent (ESA), dose: 16596U/week VERSUS Supportive transfusions IN Canadian cancer patients with anemia with an initial Hemoglobin > 10g/dL                                                                                                                                                                                                                                                          | 68744  | 76000                                | Klarenbach et al., 2010 (611) |
| Erythropoiesis-stimulating agent (ESA) dose: 37069U/week, VERSUS Supportive transfusions IN Canadian cancer patients with anemia with target Hemoglobin <=12g/dL, initial Hemoglobin<=10g/dL. Chemotherapy-induced anemia only                                                                                                                                                                                                | 131891 | 150000                               | Klarenbach et al., 2010 (611) |
| Erythropoiesis-stimulating agent (ESA) VERSUS Supportive transfusions IN Canadian cancer patients with anemia. Target Hemoglobin <= 12g/dL                                                                                                                                                                                                                                                                                    | 272012 | 300000                               | Klarenbach et al., 2010 (611) |

**Appendix**  
**Cost-Utility Analysis of Cancer Prevention, Treatment, and Control: A Systematic Review**  
**Winn et al.**

|                                                                                                                                                                                                                                                                                          |        |             |                                          |
|------------------------------------------------------------------------------------------------------------------------------------------------------------------------------------------------------------------------------------------------------------------------------------------|--------|-------------|------------------------------------------|
| Trabectedin (TRA), followed by end stage treatment VERSUS End-stage treatment IN Adult patients with mSTS who were previously treated with Anthracycline and/or ifosfamide (first line treatment)                                                                                        | 62780  | 69000       | Soini et al., 2010 (612)                 |
| Start screening for Lynch syndrome at aged 25 years and implement genetic testing at 5% risk threshold VERSUS Current practice (genetic testing for lynch syndrome was offered to those with appropriate clinical risk factors after a malignancy was detected) IN US general population | 27571  | 30000       | Dinh et al., 2011 (613)                  |
| Start screening for Lynch syndrome at aged 35 years and implement genetic testing at 5% risk threshold VERSUS Current practice (genetic testing for lynch syndrome was offered to those with appropriate clinical risk factors after a malignancy was detected) IN US general population | 24585  | 27000       | Dinh et al., 2011 (613)                  |
| Start screening for Lynch syndrome at aged 30 years and implement genetic testing at 5% risk threshold VERSUS Current practice (genetic testing for lynch syndrome was offered to those with appropriate clinical risk factors after a malignancy was detected) IN US general population | 26299  | 29000       | Dinh et al., 2011 (613)                  |
| Gemcitabine + cisplatin VERSUS Gemcitabine monotherapy for a maximum of 24 weeks IN 63 year-old patients with locally advanced or metastatic cholangiocarcinoma, gallbladder cancer, or ampullary cancer and ECOG performance status of 0-2.                                             | 59480  | 66000       | Roth et al., 2011 (614)                  |
| Intranasal fentanyl spray (infs) VERSUS Fentanyl buccal tablet (fbt) IN Swedish patients with breakthrough cancer pain and advanced stage cancer                                                                                                                                         | 17005  | 19000       | Vissers et al., 2011 (615)               |
| Intranasal fentanyl spray (infs) VERSUS Oral transmucosal fentanyl citrate (OTFC) IN Swedish patients with breakthrough cancer pain and advanced stage cancer                                                                                                                            | 5271   | 5800        | Vissers et al., 2011 (615)               |
| Clodronate administered daily orally VERSUS Zoledronate administered intravenously every 4 weeks IN Patients with metastatic bone disease (MBD) in Brazil: healthcare perspective                                                                                                        | -22653 | Cost-Saving | Cunio Machado Fonseca et al., 2011 (616) |
| Clodronate administered daily orally VERSUS Zoledronate administered intravenously every 4 weeks IN Patients with metastatic bone disease                                                                                                                                                | -22281 | Cost-Saving | Cunio Machado                            |

**Appendix**  
**Cost-Utility Analysis of Cancer Prevention, Treatment, and Control: A Systematic Review**  
**Winn et al.**

|                                                                                                                                                                                                                   |         |                                   |                            |
|-------------------------------------------------------------------------------------------------------------------------------------------------------------------------------------------------------------------|---------|-----------------------------------|----------------------------|
| (MBD) in Brazil: societal perspective                                                                                                                                                                             |         |                                   | Fonseca et al., 2011 (616) |
| Cisplatin plus raltitrexed for first-line treatment chemotherapy VERSUS Active symptom control IN Patients with malignant pleural mesothelioma                                                                    | 39615   | 44000                             | Woods et al., 2012 (617)   |
| Cisplatin plus pemetrexed for first-line treatment chemotherapy VERSUS Cisplatin plus raltitrexed for first-line treatment chemotherapy IN Patients with malignant pleural mesothelioma                           | -715566 | Increases Costs, Decreases Health | Woods et al., 2012 (617)   |
| Cisplatin for first-line treatment chemotherapy VERSUS Active symptom control IN Patients with malignant pleural mesothelioma                                                                                     |         | Increases Costs, Decreases Health | Woods et al., 2012 (617)   |
| Biennial anal cytology VERSUS None IN US HIV+ women with CD4 count <200 on antiretrovirals                                                                                                                        | 34763   | 38000                             | Lazenby et al., 2012 (618) |
| Annual anal cytology VERSUS None IN US HIV+ women with CD4 count <200 on antiretrovirals                                                                                                                          | 112026  | 120000                            | Lazenby et al., 2012 (618) |
| Denosumab VERSUS Zoledronic acid IN US patients with breast cancer                                                                                                                                                | 78915   | 83000                             | Stopeck et al., 2012 (619) |
| Denosumab VERSUS Zoledronic acid IN US patients with non-small-cell lung cancer (NSCLC)                                                                                                                           | 67931   | 71000                             | Stopeck et al., 2012 (619) |
| Denosumab VERSUS Zoledronic acid IN US patients with castration-resistant prostate cancer (CRPC)                                                                                                                  | 49405   | 52000                             | Stopeck et al., 2012 (619) |
| Direct decompressive surgery with postoperative radiotherapy (S+ RT) VERSUS Standard of care (corticosteroids and radiotherapy) IN Patients with neoplastic metastatic epidural spinal cord compression in Canada | 250307  | 270000                            | Furlan et al., 2012 (620)  |
| Tunneled pleural catheter (TPC) VERSUS Bedside pleurodesis (BP) IN Patients with malignant pleural effusion                                                                                                       | -167000 | Increases Costs, Decreases Health | Puri et al., 2012 (621)    |
| Thorascoscopic pleurodesis (TP) VERSUS Bedside pleurodesis (BP) IN Patients with malignant pleural effusion                                                                                                       | 3008500 | 3300000                           | Puri et al., 2012 (621)    |

**Appendix**  
**Cost-Utility Analysis of Cancer Prevention, Treatment, and Control: A Systematic Review**  
**Winn et al.**

|                                                                                                                                                                                                                                                                                                                                                                                          |        |                                   |                                |
|------------------------------------------------------------------------------------------------------------------------------------------------------------------------------------------------------------------------------------------------------------------------------------------------------------------------------------------------------------------------------------------|--------|-----------------------------------|--------------------------------|
| Repeated thoracentesis (RT) VERSUS Bedside pleurodesis (BP) IN Patients with malignant pleural effusion                                                                                                                                                                                                                                                                                  | -59429 | Increases Costs, Decreases Health | Puri et al., 2012 (621)        |
| Prophylactic short-term enoxaparin (LMWH) (40 mg subcutaneously once daily for 4 months) VERSUS Standard of care (no low molecular weight heparin (LMWH)) IN US patients with recent diagnosis of advanced cancer with no indication for prophylactic or therapeutic anticoagulation                                                                                                     | 90893  | 96000                             | Pishko et al., 2012 (622)      |
| Varenicline VERSUS Unaided cessation IN Adults who smoke cigarettes in Greece                                                                                                                                                                                                                                                                                                            | -8032  | Cost-Saving                       | Athanasakis et al., 2012 (623) |
| Varenicline VERSUS Bupropion IN Adults who smoke cigarettes in Greece                                                                                                                                                                                                                                                                                                                    | -85353 | Cost-Saving                       | Athanasakis et al., 2012 (623) |
| Varenicline VERSUS Nicotine replacement therapy IN Adults who smoke cigarettes in Greece                                                                                                                                                                                                                                                                                                 | -11306 | Cost-Saving                       | Athanasakis et al., 2012 (623) |
| Complex rehabilitation intervention delivered by a hospice-based multidisciplinary team VERSUS Usual care IN UK patients with advanced recurrent cancer                                                                                                                                                                                                                                  | 29936  | 33000                             | Jones et al., 2012 (624)       |
| Gene-expression profiling (GEP) on the tissue of origin (GEPTOOtesting) VERSUS Standard/Usual care IN Specific disease- metastatic and poorly differentiated cancer; Age- Adult; Gender- Both; Country- United States.                                                                                                                                                                   | 46858  | 49000                             | Hornberger et al., 2013 (625)  |
| High resolution anoscopy (HRA) at 6 months and 12 months VERSUS High resolution anoscopy (HRA) at 6 months and anal cytology at 12 months IN Specific disease- HIV infection; Age- 19 to 40 years; Gender- Male; Country- United States; Other- men having sex with men after treatment with high-grade intraepithelial neoplasia (HGAIN) and CD4 count greater than 500 cells/cubic mm. | 4446   | 4700                              | Assoumou et al., 2013 (626)    |

**Appendix**  
**Cost-Utility Analysis of Cancer Prevention, Treatment, and Control: A Systematic Review**  
**Winn et al.**

|                                                                                                                                                                                                                                                                                                                                                                                          |        |                                            |                               |
|------------------------------------------------------------------------------------------------------------------------------------------------------------------------------------------------------------------------------------------------------------------------------------------------------------------------------------------------------------------------------------------|--------|--------------------------------------------|-------------------------------|
| Combined high resolution anoscopy (HRA) and anal cytology at 6 months and HRA at 12 months VERSUS HRA at 6 months and 12 months IN Specific disease- HIV infection; Age- 19 to 40 years; Gender- Male; Country- United States; Other- men having sex with men after treatment with high-grade intraepithelial neoplasia (HGAIN) and CD4 count greater than 500 cells/cubic mm.           | -27148 | Increases<br>Costs,<br>Decreases<br>Health | Assoumou et al., 2013 (626)   |
| Combined high resolution anoscopy (HRA) and anal cytology at 6 months and anal cytology at 12 months VERSUS HRA at 6 months and 12 months IN Specific disease- HIV infection; Age- 19 to 40 years; Gender- Male; Country- United States; Other- men having sex with men after treatment with high-grade intraepithelial neoplasia (HGAIN) and CD4 count greater than 500 cells/cubic mm. | -32664 | Increases<br>Costs,<br>Decreases<br>Health | Assoumou et al., 2013 (626)   |
| Combined high resolution anoscopy (HRA) anal cytology at 6 months and 12 months VERSUS HRA at 6 months and 12 months IN Specific disease- HIV infection; Age- 19 to 40 years; Gender- Male; Country- United States; Other- men having sex with men after treatment with high-grade intraepithelial neoplasia (HGAIN) and CD4 count greater than 500 cells/cubic mm.                      | 17373  | 18000                                      | Assoumou et al., 2013 (626)   |
| HPV vaccination, including cross-protection VERSUS None IN Healthy; Age- 0 to 18 years; Gender- Female; Country- Netherlands.                                                                                                                                                                                                                                                            | 7696   | 8400                                       | Luttjeboer et al., 2013 (627) |
| HPV vaccination VERSUS None IN Healthy; Age- 0 to 18 years; Gender- Female; Country- Netherlands.                                                                                                                                                                                                                                                                                        | 9452   | 10000                                      | Luttjeboer et al., 2013 (627) |
| Delivery of cancer treatment in general practice (GP) surgery VERSUS Delivery of cancer treatment in hospital IN Specific disease- cancer; Age- 19 to 40 years, 41 to 64 years, >=65 years; Gender- Both; Country- United Kingdom.                                                                                                                                                       | 25197  | 27000                                      | Corrie et al., 2013 (628)     |

**Appendix**  
**Cost-Utility Analysis of Cancer Prevention, Treatment, and Control: A Systematic Review**  
**Winn et al.**

|                                                                                                                                                           |         |             |                          |
|-----------------------------------------------------------------------------------------------------------------------------------------------------------|---------|-------------|--------------------------|
| Doxorubicin/ ifosfamide VERSUS trabectedin monotherapy IN Specific disease- advanced soft tissue sarcoma; Age- >=65 years; Gender- Both; Country- Italy.  | -33994  | Cost-Saving | Guest et al., 2013 (629) |
| Doxorubicin/ ifosfamide VERSUS trabectedin monotherapy IN Specific disease- advanced soft tissue sarcoma; Age- >=65 years; Gender- Both; Country- Spain.  | -121659 | Cost-Saving | Guest et al., 2013 (629) |
| Doxorubicin/ ifosfamide VERSUS trabectedin monotherapy IN Specific disease- advanced soft tissue sarcoma; Age- >=65 years; Gender- Both; Country- Sweden. | -227801 | Cost-Saving | Guest et al., 2013 (629) |
| Mifamurtide VERSUS None IN Specific disease- forHigh-Grade,Resectable, NonmetastaticOsteosarcoma; Age- Adult; Gender- Both; Country- United Kingdom.      | 77764   | 86000       | Johal et al., 2013 (630) |

## Ovarian Cancer

| Description                                                                                                                                                                                          | Original US\$/QALY | 2014US\$/QALY | Reference                  |
|------------------------------------------------------------------------------------------------------------------------------------------------------------------------------------------------------|--------------------|---------------|----------------------------|
| Amifostine pretreatment VERSUS No amifostine pretreatment IN Patients with advanced ovarian cancer who are receiving combination therapy with cisplatin and cyclophosphamide                         | 36161              | 55000         | Bennett et al., 1998 (631) |
| High dose chemotherapy with autologous hematopoietic rescue VERSUS Cisplatin-based chemotherapy at conventional doses IN Patients with newly diagnosed advanced ovarian cancer                       | 31915              | 48000         | Messori et al., 1998 (632) |
| Paclitaxel plus cisplatin VERSUS Cyclophosphamide plus cisplatin IN Patients advanced ovarian cancer defined as International Federation of Gynaecology and Obstetrics' (FIGO) stage IIc, III, or IV | 13827              | 19000         | Limat et al., 2004 (633)   |

**Appendix**  
**Cost-Utility Analysis of Cancer Prevention, Treatment, and Control: A Systematic Review**  
**Winn et al.**

|                                                                                                                                                                                                                                                                                              |        |                                   |                               |
|----------------------------------------------------------------------------------------------------------------------------------------------------------------------------------------------------------------------------------------------------------------------------------------------|--------|-----------------------------------|-------------------------------|
| Referral to expert center VERSUS Referral to less experienced center IN Patients with advanced stage ovarian cancer patients in the US                                                                                                                                                       | 5029   | 5900                              | Bristow et al., 2007 (634)    |
| Inpatient intravenous paclitaxel (24 h) and intraperitoneal cisplatin plus outpatient intraperitoneal paclitaxel chemotherapy (IP/IV) VERSUS Outpatient intravenous paclitaxel (3 h) and carboplatin chemotherapy (IV/IV) IN Patients with optimal residual disease Stage III ovarian cancer | 37454  | 44000                             | Bristow et al., 2007 (635)    |
| Prophylactic surgery (hysterectomy and bilateral salpingo-oophorectomy) at age 40 years VERSUS Prophylactic surgery (hysterectomy and bilateral salpingo-oophorectomy) at age 30 years IN Women with Lynch syndrome in US                                                                    | 5025   | 5900                              | Kwon et al., 2008 (636)       |
| Combined strategy: annual screening from age 30 years with endometrial biopsy, CA 125, and transvaginal ultrasound (TVUS) VERSUS Prophylactic surgery (hysterectomy and bilateral salpingo-oophorectomy) at age 40 years IN Women with Lynch syndrome in US                                  | 194650 | 230000                            | Kwon et al., 2008 (636)       |
| Annual screening with endometrial biopsy, transvaginal ultrasound, and CA 125 from age 30 years VERSUS Annual screening from age 30 years until prophylactic surgery at age 40 years (combined strategy) IN Women with Lynch syndrome in US                                                  | -16521 | Increases Costs, Decreases Health | Kwon et al., 2008 (636)       |
| Prophylactic surgery (hysterectomy and bilateral salpingo-oophorectomy) at age 30 years VERSUS No prevention IN Women with Lynch syndrome in US, 30 years old                                                                                                                                | 13877  | 16000                             | Kwon et al., 2008 (636)       |
| Intravenous chemotherapy VERSUS Intraperitoneal therapy IN Patients with optimally resected stage 111 ovarian cancer, 11.5 year time horizon                                                                                                                                                 | 71835  | 84000                             | Havrilesky et al., 2008 (637) |
| Intravenous chemotherapy VERSUS Intraperitoneal therapy IN Patients with optimally resected stage 111 ovarian cancer, lifetime horizon                                                                                                                                                       | 32053  | 38000                             | Havrilesky et al., 2008 (637) |
| Treatment in semi-specialized hospital VERSUS Treatment in a general hospitals IN Ovarian cancer patients                                                                                                                                                                                    | 8964   | 11000                             | Greving et al., 2009 (638)    |
| Treatment in tertiary care centers VERSUS Treatment in semi-specialized                                                                                                                                                                                                                      | 128948 | 150000                            | Greving et                    |

**Appendix**  
**Cost-Utility Analysis of Cancer Prevention, Treatment, and Control: A Systematic Review**  
**Winn et al.**

|                                                                                                                                                                                                                                                                                                                                          |          |                                      |                                  |
|------------------------------------------------------------------------------------------------------------------------------------------------------------------------------------------------------------------------------------------------------------------------------------------------------------------------------------------|----------|--------------------------------------|----------------------------------|
| hospital IN Ovarian cancer patients                                                                                                                                                                                                                                                                                                      |          |                                      | al., 2009<br>(638)               |
| Population-based BRCA 1/2 testing measuring cancer incidence, life expectancy and costs VERSUS No intervention IN Ashkenazi Jewish women living in the United States ages 35-55 years                                                                                                                                                    | 8300     | 9500                                 | Rubinstein et al., 2009<br>(639) |
| Annual gynecologic surveillance VERSUS Annual exams IN US women aged 30 years with lynch syndrome (hereditary nonpolyposis colorectal cancer)                                                                                                                                                                                            | -56302   | Cost-Saving                          | Yang et al., 2011<br>(640)       |
| Prophylactic Surgery VERSUS Annual gynecologic surveillance IN US women aged 30 years with lynch syndrome (hereditary nonpolyposis colorectal cancer)                                                                                                                                                                                    | -83644   | Cost-Saving                          | Yang et al., 2011<br>(640)       |
| Docetaxel and carboplatin (cDC) weekly VERSUS Ssequential single-agent docataxel followed by carboplatin (sDC) IN US women with recurrent, platinum-sensitive ovarian cancer                                                                                                                                                             | 25239    | 27000                                | Havrilesky et al., 2011<br>(641) |
| Carrboplatin, paclitaxel, bevacizumab, and bevacizumab maintenance VERSUS Carboplatin, paclitaxel and paclitaxel maintenance IN Older adult patients aged 58 years diagnosed with epithelial ovarian cancer                                                                                                                              | -1980240 | Increases Costs,<br>Decreases Health | Lesnock et al., 2011<br>(642)    |
| Carboplatin, paclitaxel and paclitaxel maintenance VERSUS Carboplatin and paclitaxel IN Older adult patients aged 58 years diagnosed with epithelial ovarian cancer                                                                                                                                                                      | 13402    | 15000                                | Lesnock et al., 2011<br>(642)    |
| Prolonged Prophylaxis (PP) for venous thromboembolism: Enoxaparin (40mg) subcutaneously once daily for 4 weeks post-surgery VERSUS No additional therapy after discharge IN US patients aged 65 years with stage IIIC ovarian cancer having cytoreductive surgery followed by six cycles of chemotherapy with carboplatin and paclitaxel | -1413    | Cost-Saving                          | Uppal et al., 2012<br>(643)      |
| Prophylactic salpingectomy at age 40 years with prophylactic oophorectomy at age 50 years VERSUS Prophylactic (bilateral) salpingectomy at age 40 years IN Specific disease- Ovarian Cancer; Age- 19 to 40 years; Gender- Female; Country- Canada; Other- BRCA2 mutation carriers.                                                       | 89746    | 93000                                | Kwon et al., 2013<br>(644)       |



**Appendix**  
**Cost-Utility Analysis of Cancer Prevention, Treatment, and Control: A Systematic Review**  
**Winn et al.**

|                                                                                                                                                                                                                                                                                    |         |                                   |                               |
|------------------------------------------------------------------------------------------------------------------------------------------------------------------------------------------------------------------------------------------------------------------------------------|---------|-----------------------------------|-------------------------------|
| Prophylactic salpingectomy at age 40 years with prophylactic oophorectomy at age 50 years VERSUS Prophylactic (bilateral) salpingectomy at age 40 years IN Specific disease- Ovarian Cancer; Age- 19 to 40 years; Gender- Female; Country- Canada; Other- BRCA1 mutation carriers. | 37833   | 39000                             | Kwon et al., 2013 (644)       |
| Prophylactic (bilateral) salpingectomy at age 40 years VERSUS Bilateral salpingo-oophorectomy at age 40 years IN Specific disease- Ovarian Cancer; Age- 19 to 40 years; Gender- Female; Country- Canada; Other- BRCA2 mutation carriers.                                           | 25677   | 26000                             | Kwon et al., 2013 (644)       |
| Prophylactic (bilateral) salpingectomy at age 40 years VERSUS Bilateral salpingo-oophorectomy at age 40 years IN Specific disease- Ovarian Cancer; Age- 19 to 40 years; Gender- Female; Country- Canada; Other- BRCA1 mutation carriers.                                           | 20065   | 21000                             | Kwon et al., 2013 (644)       |
| Total laproscopic hysterectomy VERSUS total adominal hysterectomy IN Specific disease- early stage endometrial cancer; Age- Adult; Gender- Female; Country- Australia.                                                                                                             | -96763  | Cost-Saving                       | Graves et al., 2013 (645)     |
| Early Palliative Care VERSUS None IN Specific disease- Ovarian Cancer; Age- Unknown; Gender- Female; Country- United States.                                                                                                                                                       | 37440   | Cost-Saving                       | Lowery et al., 2013 (646)     |
| Trabectedin plus pegylated liposomal doxorubicin VERSUS Liposomal doxorubicin IN Specific disease- Ovarian Cancer; Age- Adult; Gender- Female; Country- United Kingdom.                                                                                                            | 61005   | 64000                             | Fisher et al., 2013 (647)     |
| Lymph node dissection VERSUS No LND; hysterectomy IN Specific disease- Grade 3 endometrial cancer; Age- Adult; Gender- Female; Country- United States; Other- pre-surgical early stage population.                                                                                 | 40183   | 42000                             | Havrilesky et al., 2013 (648) |
| Lymph node dissection VERSUS No LND; hysterectomy IN Specific disease- Grades 2-3 endometrial cancer; Age- Adult; Gender- Female; Country- United States; Other- pre-surgical early stage population.                                                                              | -243100 | Increases Costs, Decreases Health | Havrilesky et al., 2013 (648) |

**Appendix**  
**Cost-Utility Analysis of Cancer Prevention, Treatment, and Control: A Systematic Review**  
**Winn et al.**

|                                                                                                                                                                                                                                                                                                                               |        |        |                            |
|-------------------------------------------------------------------------------------------------------------------------------------------------------------------------------------------------------------------------------------------------------------------------------------------------------------------------------|--------|--------|----------------------------|
| Polyethylene glycolated liposomal doxorubicin (PLD)/carboplatin VERSUS Paclitaxel/carboplatin IN Specific disease- platinum-sensitive recurrent ovarian cancer; Age- Adult; Gender- Female; Country- South Korea.                                                                                                             | 21658  | 23000  | Lee et al., 2013 (649)     |
| Bevacizumab (7.5mg/m2) administered with primary chemotherapy (carboplatin and paclitaxel) VERSUS Carboplatin and paclitaxel chemotherapy IN Specific disease- Ovarian Cancer; Age- Adult; Gender- Female; Country- United States; Other- High risk (Suboptimally debulked stage IIIC or stage IV) disease.                   | 168610 | 180000 | Barnett et al., 2013 (650) |
| Bevacizumab (7.5mg/m2) administered with primary chemotherapy (carboplatin and paclitaxel) for patients testing positive for single nucleotide polymorphism biomarker predictive test VERSUS Carboplatin and paclitaxel chemotherapy IN Specific disease- Ovarian Cancer; Age- Adult; Gender- Female; Country- United States. | 128928 | 140000 | Barnett et al., 2013 (650) |

### Pancreatic Cancer

| Description                                                                                                                                                                                                        | Original US\$/QALY | 2014US\$/QALY                     | Reference                       |
|--------------------------------------------------------------------------------------------------------------------------------------------------------------------------------------------------------------------|--------------------|-----------------------------------|---------------------------------|
| Initial endoscopic placement of a metal biliary stent VERSUS Initial endoscopic placement of a plastic biliary stent IN Patients with unresectable pancreatic carcinoma and obstructive jaundice                   | -154643            | Cost-Saving                       | Arguedas et al., 2002 (651)     |
| Radiation plus concurrent fluorouracil-based chemotherapy VERSUS No treatment IN 65- year old patients with locally advanced pancreatic cancer and no major co-morbidity                                           | 68724              | 83000                             | Krzyzanowska et al., 2007 (652) |
| Annual surveillance endoscopic ultrasound with fine needle aspiration VERSUS Do nothing IN 45 year old male, first degree relative of pancreatic adenocarcinoma patients with EUS findings of chronic pancreatitis | -62759             | Increases Costs, Decreases Health | Rubenstein et al., 2007 (653)   |

**Appendix**  
**Cost-Utility Analysis of Cancer Prevention, Treatment, and Control: A Systematic Review**  
**Winn et al.**

|                                                                                                                                                                                                                                 |         |                                      |                               |
|---------------------------------------------------------------------------------------------------------------------------------------------------------------------------------------------------------------------------------|---------|--------------------------------------|-------------------------------|
| Annual surveillance endoscopic ultrasound VERSUS Do nothing IN 45 year old male, first degree relative of pancreatic adenocarcinoma patients with EUS findings of chronic pancreatitis                                          | -45436  | Increases Costs,<br>Decreases Health | Rubenstein et al., 2007 (653) |
| Prophylactic total pancreatectomy VERSUS Do nothing IN 45 year old male, first degree relative of pancreatic adenocarcinoma patients with EUS findings of chronic pancreatitis                                                  | -45904  | Increases Costs,<br>Decreases Health | Rubenstein et al., 2007 (653) |
| Surveillance VERSUS No surveillance IN United States 60 year old patients with branch duct intraductal papillary mucinous neoplasm                                                                                              | 20096   | 22000                                | Huang et al., 2009 (654)      |
| Surgery VERSUS Surveillance IN United States 60 year old patients with branch duct intraductal papillary mucinous neoplasm                                                                                                      | 132436  | 150000                               | Huang et al., 2009 (654)      |
| Surgical resection aimed at cure VERSUS Standard care IN Swedish patients with exocrine or ampullary pancreatic adenocarcinoma                                                                                                  | 48267   | 53000                                | Ljungman et al., 2010 (655)   |
| Gemcitabine with radiotherapy VERSUS Gemcitabine with stereotactic body radiotherapy (SBRT) IN Patients with locally advanced pancreatic cancer receiving chemotherapy or chemotherapy and radiation                            | -50000  | Increases Costs,<br>Decreases Health | Murphy et al., 2011 (656)     |
| Gemcitabine with intensity-modulated radiotherapy (IMRT) VERSUS Gemcitabine with stereotactic body radiotherapy (SBRT) IN Patients with locally advanced pancreatic cancer receiving chemotherapy or chemotherapy and radiation | -224561 | Increases Costs,<br>Decreases Health | Murphy et al., 2011 (656)     |
| Gemcitabine with conventional radiotherapy VERSUS Gemcitabine IN Patients with locally advanced pancreatic cancer receiving chemotherapy or chemotherapy and radiation                                                          | 126800  | 140000                               | Murphy et al., 2011 (656)     |

**Appendix**  
**Cost-Utility Analysis of Cancer Prevention, Treatment, and Control: A Systematic Review**  
**Winn et al.**

|                                                                                                                                                                                                                                                                                                                                                                                                                            |         |             |                             |
|----------------------------------------------------------------------------------------------------------------------------------------------------------------------------------------------------------------------------------------------------------------------------------------------------------------------------------------------------------------------------------------------------------------------------|---------|-------------|-----------------------------|
| Gemcitabine with intensity-modulated radiotherapy (IMRT) VERSUS Gemcitabine with conventional radiotherapy IN Patients with locally advanced pancreatic cancer receiving chemotherapy or chemotherapy and radiation                                                                                                                                                                                                        | 1371429 | 1500000     | Murphy et al., 2011 (656)   |
| Gemcitabine plus stereotactic body radiotherapy (SBRT) VERSUS Gemcitabine alone IN Patients with locally advanced pancreatic cancer receiving chemotherapy or chemotherapy and radiation                                                                                                                                                                                                                                   | 69500   | 77000       | Murphy et al., 2011 (656)   |
| Everolimus (10mg daily) VERSUS Sunitinib (37.5mg daily) IN Patients with advanced progressive pancreatic neuroendocrine tumors                                                                                                                                                                                                                                                                                             | 34816   | 37000       | Casciano et al., 2012 (657) |
| Chemotherapy alone (gemcitabine 600mg per m.sq. concurrent with cisplatin 30 mg per m.sq. both 3 times per month for 4 months) VERSUS None IN Patients with radiographically resectable pancreatic head adenocarcinoma                                                                                                                                                                                                     | 36264   | 38000       | Abbott et al., 2012 (658)   |
| Surgery plus adjuvant chemotherapy (gemcitabine 1000 mg per m.sq, 3 infusions per month for 6 months) VERSUS None IN Patients with radiographically resectable pancreatic head adenocarcinoma                                                                                                                                                                                                                              | 91956   | 97000       | Abbott et al., 2012 (658)   |
| Surgery plus adjuvant chemotherapy VERSUS Chemotherapy alone (gemcitabine 600mg per m.sq. concurrent with cisplatin 30 mg per m.sq. both 3 times per month for 4 months) IN Patients with radiographically resectable pancreatic head adenocarcinoma                                                                                                                                                                       | 133404  | 140000      | Abbott et al., 2012 (658)   |
| VERSUS IN Specific disease- resectable pancreatic head adenocarcinoma; Age- Adult; Gender- Both; Country- United States.                                                                                                                                                                                                                                                                                                   | -12184  | Cost-Saving | Abbott et al., 2013 (659)   |
| Personalized palliative care- providing individual palliative care by accounting for individual's clinical characteristics and standard palliative care (conventional treatment based on sufficient pain management) VERSUS None IN Specific disease- malignancy of the exocrine pancreas or ampulla; Age- 19 to 40 years, 41 to 64 years, >=65 years; Gender- Not Specified; Country- Sweden; Other- unresectable tumors. | 143399  | 150000      | Ljungman et al., 2013 (660) |

**Appendix**  
**Cost-Utility Analysis of Cancer Prevention, Treatment, and Control: A Systematic Review**  
**Winn et al.**

|                                                                                                                                                                                                                                                                  |        |        |                              |
|------------------------------------------------------------------------------------------------------------------------------------------------------------------------------------------------------------------------------------------------------------------|--------|--------|------------------------------|
| Resection VERSUS None IN Specific disease- malignancy of the exocrine pancreas or ampulla; Age- 19 to 40 years, 41 to 64 years, >=65 years; Gender- Not Specified; Country- Sweden; Other- resectable tumors.                                                    | 62743  | 66000  | Ljungman et al., 2013 (660)  |
| Capecitabine + gemcitabine (GEM) (Gem-CAP) VERSUS Standard/Usual care- Gemcitabine (GEM) alone IN Specific disease- Metastatic pancreatic cancer; Age- Unknown; Gender- Both; Country- Canada.                                                                   | 81888  | 89000  | Tam et al., 2013 (661)       |
| Erlotinib combination (gem-e) consisting of erlotinib + gemcitabine (GEM) VERSUS Standard/Usual care- Gemcitabine (GEM) alone IN Specific disease- Metastatic pancreatic cancer; Age- Unknown; Gender- Both; Country- Canada.                                    | 149237 | 160000 | Tam et al., 2013 (661)       |
| Combination of 5-fluorouracil, folinic acid, irinotecan, and oxaliplatin (folfirinox) with gemcitabine (GEM) VERSUS Standard/Usual care- Gemcitabine (GEM) alone IN Specific disease- Metastatic pancreatic cancer; Age- Unknown; Gender- Both; Country- Canada. | 129375 | 140000 | Tam et al., 2013 (661)       |
| Screening for pancreatic cancer VERSUS Standard/Usual Care IN Specific disease- diabetes; Age- Adult; Gender- Both; Country- Sweden.                                                                                                                             | 18739  | 20000  | Ghatnekar et al., 2013 (662) |

## Prostate Cancer

| Description                                                                                                                                                                             | Original US\$/QALY | 2014US\$/QALY | Reference                    |
|-----------------------------------------------------------------------------------------------------------------------------------------------------------------------------------------|--------------------|---------------|------------------------------|
| Preoperative autologous donation, overall VERSUS No preoperative autologous donation IN Patients with clinical Stage A or B prostate cancer undergoing radical retropubic prostatectomy | 1813000            | 3000000       | Goodnough et al., 1994 (663) |
| Flutamide plus orchiectomy VERSUS Orchiectomy alone IN 70-yo men with newly diagnosed, untreated minimal metastatic prostate carcinoma with good performance status                     | 27000              | 43000         | Bennett et al., 1996 (664)   |

**Appendix**  
**Cost-Utility Analysis of Cancer Prevention, Treatment, and Control: A Systematic Review**  
**Winn et al.**

|                                                                                                                                                                    |        |                                      |                               |
|--------------------------------------------------------------------------------------------------------------------------------------------------------------------|--------|--------------------------------------|-------------------------------|
| Flutamide plus orchiectomy VERSUS Orchiectomy alone IN 70-yo men with newly diagnosed, untreated severe metastatic prostate carcinoma with good performance status | 18840  | 30000                                | Bennett et al., 1996 (664)    |
| biopsy VERSUS no biopsy IN 50 yo men with excess PSA levels and probability of clinically significant cancer given positive biopsy = 0.2                           |        | Cost-Saving                          | Gottlieb et al., 1996 (665)   |
| biopsy VERSUS no biopsy IN 60 yo men with excess PSA levels (>0ng/mL) and probability of clinically significant cancer given positive biopsy = 0.2                 | 13558  | 22000                                | Gottlieb et al., 1996 (665)   |
| biopsy VERSUS no biopsy IN 70 yo men with excess PSA levels (>0ng/mL) and probability of clinically significant cancer given positive biopsy = 0.2                 |        | Increases Costs,<br>Decreases Health | Gottlieb et al., 1996 (665)   |
| Endorectal surface coil for MR imaging VERSUS Conventional magnetic resonance imaging IN Otherwise healthy men with biopsy-proved prostate cancer                  | 1158   | 1800                                 | Langlotz et al., 1996 (666)   |
| High specificity Endorectal surface coil for MR imaging VERSUS Endorectal surface coil for MR imaging IN Otherwise healthy men with biopsy-proved prostate cancer  | 10525  | 17000                                | Langlotz et al., 1996 (666)   |
| Mitoxantrone & prednisone VERSUS Prednisone alone IN Patients with symptomatic (pain) hormone-refractory prostate cancer                                           | -4873  | Cost-Saving                          | Bloomfield et al., 1998 (667) |
| Magnetic Resonance Imaging VERSUS Radical prostatectomy performed on the basis of clinical staging IN 65 year old male candidates for surgery on prostate cancer   |        | Cost-Saving                          | Jager et al., 2000 (668)      |
| Bilateral orchiectomy VERSUS Diethylstilbestrol IN 65 year old male with previous history of prostate cancer                                                       | 7500   | 11000                                | Bayoumi et al., 2000 (669)    |
| Nonsteroidal antiandrogen (NSAA) VERSUS Bilateral orchiectomy IN 65 year old male with previous history of prostate cancer                                         | -75833 | Increases Costs,<br>Decreases Health | Bayoumi et al., 2000 (669)    |

**Appendix**  
**Cost-Utility Analysis of Cancer Prevention, Treatment, and Control: A Systematic Review**  
**Winn et al.**

|                                                                                                                                                                                                                                                                                                            |          |                                   |                              |
|------------------------------------------------------------------------------------------------------------------------------------------------------------------------------------------------------------------------------------------------------------------------------------------------------------|----------|-----------------------------------|------------------------------|
| Nonsteroidal antiandrogen (NSAA) + bilateral orchiectomy VERSUS Bilateral orchiectomy IN 65 year old male with previous history of prostate cancer                                                                                                                                                         | -274000  | Increases Costs, Decreases Health | Bayoumi et al., 2000 (669)   |
| Luteinizing hormone-releasing hormone agonist (LHRH) VERSUS Bilateral orchiectomy IN 65 year old male with previous history of prostate cancer                                                                                                                                                             | -1000000 | Increases Costs, Decreases Health | Bayoumi et al., 2000 (669)   |
| Nonsteroidal antiandrogen (NSAA) + luteinizing hormone-releasing hormone agonist VERSUS Bilateral orchiectomy IN 65 year old male with previous history of prostate cancer                                                                                                                                 | -475714  | Increases Costs, Decreases Health | Bayoumi et al., 2000 (669)   |
| Selection-based management policy using DNA-ploidy as an experimental marker (prostatectomy for nondiploid result; monitoring for diploid result) VERSUS Monitoring (observation) IN Male patients diagnosed with moderately differentiated (Gleason sum score 5-7) prostate cancer - age 60               | 17374    | 23000                             | Calvert et al., 2003 (670)   |
| Selection-based management policy using DNA-ploidy as an experimental marker (prostatectomy for nondiploid result; monitoring for diploid result) VERSUS Radical prostatectomy for all patients IN Male patients diagnosed with moderately differentiated (Gleason sum score 5-7) prostate cancer - age 60 | 24804    | 33000                             | Calvert et al., 2003 (670)   |
| Zoledronic acid VERSUS Placebo IN Multi-national men with advanced stage prostate cancer                                                                                                                                                                                                                   | 159200   | 220000                            | Reed et al., 2004 (671)      |
| Bicalutamide and standard care VERSUS Standard care only IN Patients with early prostate cancer enrolled in a large clinical trial in Belgium                                                                                                                                                              | 25581    | 34000                             | Moeremans et al., 2004 (672) |
| Single fraction radiotherapy VERSUS Pain medication IN Patient with hormone-refractory prostate cancer who had developed a painful solitary bone metastasis                                                                                                                                                | 6857     | 9000                              | Konski et al., 2004 (673)    |
| Multifraction radiotherapy VERSUS Pain medication IN Patient with hormone-refractory prostate cancer who had developed a painful solitary bone metastasis                                                                                                                                                  | 36000    | 47000                             | Konski et al., 2004 (673)    |

**Appendix**  
**Cost-Utility Analysis of Cancer Prevention, Treatment, and Control: A Systematic Review**  
**Winn et al.**

|                                                                                                                                                                                                                |        |                                      |                            |
|----------------------------------------------------------------------------------------------------------------------------------------------------------------------------------------------------------------|--------|--------------------------------------|----------------------------|
| Chemotherapy VERSUS Pain medication IN Patient with hormone-refractory prostate cancer who had developed a painful solitary bone metastasis                                                                    | -52709 | Increases Costs,<br>Decreases Health | Konski et al., 2004 (673)  |
| Androgen blockade therapy (CAB) with bicalutamide plus monthly luteinizing hormone releasing hormone agonist (LH-Rha) VERSUS LH-RHa therapy alone IN Men with documented metastatic prostate cancer (stage D2) | 20053  | 26000                                | Penson et al., 2005 (674)  |
| Finasteride prevention therapy VERSUS No prevention therapy IN Men in the US without prostate cancer - age 55                                                                                                  | 226087 | 290000                               | Zeliadt et al., 2005 (675) |
| Hormone therapy with radiation VERSUS Radiation alone IN Patients with locally advanced prostate cancer                                                                                                        | 2153   | 2800                                 | Konski et al., 2005 (676)  |
| Bicalutamide with a luteinizing hormone-releasing hormone (LHRH) (5 years) VERSUS Flutamide with a LHRH (5 years) IN Men with documented metastatic prostate cancer (stage D2)                                 | 22000  | 28000                                | Ramsey et al., 2005 (677)  |
| Bicalutamide with a luteinizing hormone-releasing hormone (LHRH) (10 years) VERSUS Flutamide with a LHRH (10 years) IN Men with documented metastatic prostate cancer (stage D2)                               | 16000  | 21000                                | Ramsey et al., 2005 (677)  |
| Intensity-modulated radiation therapy (IMRT) VERSUS 3D conformal radiation therapy (3DCRT) IN Males aged 70 year with good risk for prostate cancer                                                            | 17448  | 22000                                | Konski et al., 2005 (678)  |
| Intensity-modulated radiation therapy (IMRT) VERSUS 3D conformal radiation therapy (3DCRT) IN Males aged 70 year with intermediate risk for prostate cancer                                                    | 16182  | 20000                                | Konski et al., 2005 (678)  |
| Long-term androgen-deprivation with radiation therapy (RT) VERSUS Short-term androgen-deprivation with RT IN Men with histologically confirmed adenocarcinoma of the prostate                                  | 1122   | 1400                                 | Konski et al., 2006 (679)  |
| VERSUS IN 70-year old patients with intermediate-risk prostate cancer                                                                                                                                          | 40101  | 50000                                | Konski et al., 2006 (680)  |
| Annual screening regardless of PSA level VERSUS Biennial screening if PSA<=3 IN Japanese Men screened for prostate cancer                                                                                      | 80857  | 98000                                | Kobayashi et al., 2007     |



**Appendix**  
**Cost-Utility Analysis of Cancer Prevention, Treatment, and Control: A Systematic Review**  
**Winn et al.**

|                                                                                                                                                                                                                                                     |        |                                            |                              |
|-----------------------------------------------------------------------------------------------------------------------------------------------------------------------------------------------------------------------------------------------------|--------|--------------------------------------------|------------------------------|
|                                                                                                                                                                                                                                                     |        |                                            | (681)                        |
| Biennial screening if PSA≤1.0 VERSUS Biennial screening if PSA≤3.0 IN Japanese Men screened for prostate cancer                                                                                                                                     | 34231  | 41000                                      | Kobayashi et al., 2007 (681) |
| Biennial screening if PSA≤2.0 VERSUS Biennial screening if PSA≤3.0 IN Japanese Men screened for prostate cancer                                                                                                                                     | 9250   | 11000                                      | Kobayashi et al., 2007 (681) |
| Biennial screening if PSA≤2.0 VERSUS Biennial screening if PSA≤3.0 IN Japanese Men screened for prostate cancer                                                                                                                                     | -7727  | Increases<br>Costs,<br>Decreases<br>Health | Kobayashi et al., 2007 (681) |
| Proton beam therapy VERSUS Intensity modulated radiation therapy (IMRT) IN 70 year old man with prostate cancer                                                                                                                                     | 63578  | 77000                                      | Konski et al., 2007 (682)    |
| Proton beam therapy VERSUS Intensity modulated radiation therapy (IMRT) IN 60 year old man with prostate cancer                                                                                                                                     | 55726  | 68000                                      | Konski et al., 2007 (682)    |
| Cyproterone acetate (mono hormone therapy) VERSUS Bicalutamine (complete androgenic blockade) IN Prostate cancer patients                                                                                                                           | -55636 | Cost-Saving                                | Lazzaro et al., 2007 (683)   |
| Cyproterone acetate (mono hormone therapy) VERSUS LHRH-a (complete androgenic blockade) IN Prostate cancer patients                                                                                                                                 | -7538  | Cost-Saving                                | Lazzaro et al., 2007 (683)   |
| Finasteride treatment as a prophylactic against the development of prostate cancer VERSUS No preventive treatment IN 50 year old men in the United States with a Prostate Specific Antigen of <3.0mg per ml and a normal Digital Rectal Examination | 122747 | 140000                                     | Svatek et al., 2008 (684)    |
| Finasteride treatment as a prophylactic against the development of prostate cancer VERSUS No preventive treatment IN 50 year old men in the United States with a Prostate Specific Antigen of <3.0mg per ml and a normal Digital Rectal Examination | 112062 | 130000                                     | Svatek et al., 2008 (684)    |

**Appendix**  
**Cost-Utility Analysis of Cancer Prevention, Treatment, and Control: A Systematic Review**  
**Winn et al.**

|                                                                                                                                                                                                                                                                                                 |         |                                   |                            |
|-------------------------------------------------------------------------------------------------------------------------------------------------------------------------------------------------------------------------------------------------------------------------------------------------|---------|-----------------------------------|----------------------------|
| Finasteride treatment as a prophylactic against the development of prostate cancer VERSUS No preventive treatment IN 50 year old men in the United States with a Prostate Specific Antigen of <3.0mg per ml and a normal Digital Rectal Examination                                             | 3405932 | 3900000                           | Svatek et al., 2008 (684)  |
| Computerized tomography for initial patient positioning for radiotherapy localization to treat prostate cancer VERSUS Ultrasound initial patient positioning for radiotherapy localization to treat prostate cancer IN United States Prostate Cancer patients aged 46-79 (average age=66; SD=9) | -18639  | Increases Costs, Decreases Health | Quigley et al., 2008 (685) |
| Electromagnetic (Calypso 4D) VERSUS Ultrasound initial patient positioning for radiotherapy localization to treat prostate cancer IN United States Prostate Cancer patients aged 46-79 (average age=66; SD=9)                                                                                   | 14053   | 17000                             | Quigley et al., 2008 (685) |
| Ultrasound initial patient positioning for radiotherapy to treat prostate cancer VERSUS Electronic portal imaging devices for initial patient position for radiotherapy to treat prostate cancer IN United States Prostate Cancer patients aged 46-79 (average age=66; SD=9)                    | 5959    | 7000                              | Quigley et al., 2008 (685) |
| Prostate Px test VERSUS Current post-prostatectomy practice IN Post-prostatectomy prostate cancer patients in the United States                                                                                                                                                                 | 2100    | 2400                              | Zubek et al., 2009 (686)   |
| Nomogram VERSUS Current post-prostatectomy practice IN Post-prostatectomy prostate cancer patients in the United States                                                                                                                                                                         | 35      | 40                                | Zubek et al., 2009 (686)   |
| Prostate Px test VERSUS Nonogram IN Post-prostatectomy prostate cancer patients in the United States                                                                                                                                                                                            | 4704    | 5400                              | Zubek et al., 2009 (686)   |
| Original IMPACT program VERSUS Baseline, no program. (reliance on the county health care safety net) IN Men with prostate cancer, mean age of diagnosis 60 years. (worst case scenario)                                                                                                         | 27189   | 34000                             | Bergman et al., 2009 (687) |
| Modified IMPACT program (\$10 million budget) VERSUS Baseline, no program. (reliance on the county health care safety net) IN Men with prostate cancer, mean age of diagnosis 60 years. (worst case scenario)                                                                                   | 84236   | 110000                            | Bergman et al., 2009 (687) |
| Medicaid prostate cancer program VERSUS Baseline, no program. (reliance on the county health care safety net) IN Men with prostate cancer, mean age of diagnosis 60 years. (worst case scenario)                                                                                                | 10714   | 13000                             | Bergman et al., 2009 (687) |

**Appendix**  
**Cost-Utility Analysis of Cancer Prevention, Treatment, and Control: A Systematic Review**  
**Winn et al.**

|                                                                                                                                                                                                                                                                                                                                                                |        |        |                             |
|----------------------------------------------------------------------------------------------------------------------------------------------------------------------------------------------------------------------------------------------------------------------------------------------------------------------------------------------------------------|--------|--------|-----------------------------|
| hemoprevention 5-alpha reductase inhibitors (5ARIs) to avert prostate cancer. Finesterase 5mg daily. Dutasteride 0.5mg daily. VERSUS No chemoprevention to avert prostate cancer. Standard care. IN US men aged 75+ y.o. who have been previously examined for prostate cancer and men considered to be at greater risk for prostate cancer.                   | 37900  | 42000  | Earnshaw et al., 2010 (688) |
| No bone mineral density (BMD) test and universal alendronate therapy VERSUS Bone mineral density (BMD) test and selective alendronate therapy for patients with osteoporosis IN United States men aged 70 years with locally advanced or high-risk localized prostate cancer starting a 2-year course of androgen deprivation therapy after radiation therapy. | 178700 | 200000 | Ito et al., 2010 (689)      |
| Bone mineral density test (BMD) and selective alendronate therapy for patients with osteoporosis VERSUS No bone mineral density test (BMD) and no alendronate therapy IN United States men aged 70 years with locally advanced or high-risk localized prostate cancer starting a 2-year course of androgen deprivation therapy after radiation therapy.        | 66800  | 73000  | Ito et al., 2010 (689)      |
| Dustasteride chemoprevention VERSUS Placebo IN Men with a PSA of 2.5-10.0 mg/mL, a normal biopsy, absence of severe lower urinary tract symptoms and a prostate volume of =80ml                                                                                                                                                                                | 140240 | 150000 | Svatek et al., 2010 (690)   |
| Chemoprevention with finasteride for 25 years VERSUS No chemoprevention IN 50 year-old US male patients with negative family history of prostate cancer                                                                                                                                                                                                        | 101025 | 110000 | Reed et al., 2011 (691)     |
| Chemoprevention with finasteride for 25 years VERSUS No chemoprevention IN 50 year-old US male patients with positive family history of prostate cancer                                                                                                                                                                                                        | 64193  | 71000  | Reed et al., 2011 (691)     |
| Chemoprevention with finasteride for 25 years VERSUS No chemoprevention IN 50 year-old US male patients                                                                                                                                                                                                                                                        | 89300  | 99000  | Reed et al., 2011 (691)     |
| Zoledronic acid (4mg) administered via IV infusion every 3 weeks for 15 months VERSUS Placebo IN Patients with hormone-refractory prostate cancer (HRPC) with a documented history of bone metastases in Portugal                                                                                                                                              | 12745  | 14000  | Carter et al., 2011 (692)   |

**Appendix**  
**Cost-Utility Analysis of Cancer Prevention, Treatment, and Control: A Systematic Review**  
**Winn et al.**

|                                                                                                                                                                                                                               |           |                                   |                             |
|-------------------------------------------------------------------------------------------------------------------------------------------------------------------------------------------------------------------------------|-----------|-----------------------------------|-----------------------------|
| Zoledronic acid (4mg) administered via IV infusion every 3 weeks for 15 months VERSUS Placebo IN Patients with hormone-refractory prostate cancer (HRPC) with a documented history of bone metastases in Germany              | 35123     | 39000                             | Carter et al., 2011 (692)   |
| Zoledronic acid (4mg) administered via IV infusion every 3 weeks for 15 months VERSUS Placebo IN Patients with hormone-refractory prostate cancer (HRPC) with a documented history of bone metastases in Netherlands          | 3578      | 3900                              | Carter et al., 2011 (692)   |
| Zoledronic acid (4mg) administered via IV infusion every 3 weeks for 15 months VERSUS Placebo IN Patients with hormone-refractory prostate cancer (HRPC) with a documented history of bone metastases in France               | 53022     | 58000                             | Carter et al., 2011 (692)   |
| Robot-assisted laparoscopic prostatectomy (RALP) VERSUS Retropubic radical prostatectomy (RRP) IN Patients aged 50 - 69 years with clinically localised prostate cancer undergoing radical prostatectomy (RP)                 | -1071571  | Increases Costs, Decreases Health | Hohw? et al., 2011 (693)    |
| Formal one-to-one pelvic-floor muscle training with therapist VERSUS Standard of care & lifestyle advice IN UK men with urinary incontinence post transurethral resection of the prostate (TURP)                              | -10087229 | Increases Costs, Decreases Health | Glazener et al., 2011 (694) |
| Formal one-to-one pelvic-floor muscle training with therapist VERSUS Standard of care & lifestyle advice IN UK men with urinary incontinence post radical prostatectomy                                                       | 131052    | 140000                            | Glazener et al., 2011 (694) |
| Usual care plus chemoprevention with dutasteride (0.5 mg/day) VERSUS Usual care plus placebo IN US healthy men aged 50-75 years at increased risk for prostate cancer                                                         | 21781     | 24000                             | Kattan et al., 2011 (695)   |
| Monthly injection of degarelix VERSUS 3-monthly luteinizing hormone-releasing hormone analogue (triptorelin) plus short-term antiandrogen treatment IN UK patients aged 70 years with asymptomatic metastatic prostate cancer | 85445     | 94000                             | Lu et al., 2011 (696)       |
| Radical prostatectomy for localized prostate cancer VERSUS Watchful waiting IN Men aged 70 years with Gleason score between 0-4 and prostate specific antigen score <=10 in Sweden                                            | 34449     | 39000                             | Lyth et al., 2012 (697)     |

**Appendix**  
**Cost-Utility Analysis of Cancer Prevention, Treatment, and Control: A Systematic Review**  
**Winn et al.**

|                                                                                                                                                                                             |       |       |                         |
|---------------------------------------------------------------------------------------------------------------------------------------------------------------------------------------------|-------|-------|-------------------------|
| Radical prostatectomy for localized prostate cancer VERSUS Watchful waiting IN Men aged 75 years with Gleason score between 0-4 and prostate specific antigen score $\leq 10$ in Sweden     | 12984 | 15000 | Lyth et al., 2012 (697) |
| Radical prostatectomy for localized prostate cancer VERSUS Watchful waiting IN Men aged 65 years with Gleason score between 0-4 and prostate specific antigen score between 11-20 in Sweden | 5169  | 5900  | Lyth et al., 2012 (697) |
| Radical prostatectomy for localized prostate cancer VERSUS Watchful waiting IN Men aged 70 years with Gleason score between 0-4 and prostate specific antigen score between 11-20 in Sweden | 19240 | 22000 | Lyth et al., 2012 (697) |
| Radical prostatectomy for localized prostate cancer VERSUS Watchful waiting IN Men aged 75 years with Gleason score between 0-4 and prostate specific antigen score between 11-20 in Sweden | 63377 | 72000 | Lyth et al., 2012 (697) |
| Radical prostatectomy for localized prostate cancer VERSUS Watchful waiting IN Men aged 65 years with Gleason score between 0-4 and prostate specific antigen score $> 20$ in Sweden        | 3117  | 3600  | Lyth et al., 2012 (697) |
| Radical prostatectomy for localized prostate cancer VERSUS Watchful waiting IN Men aged 70 years with Gleason score between 0-4 and prostate specific antigen score $> 20$ in Sweden        | 12700 | 15000 | Lyth et al., 2012 (697) |
| Radical prostatectomy for localized prostate cancer VERSUS Watchful waiting IN Men aged 75 years with Gleason score between 0-4 and prostate specific antigen score $> 20$ in Sweden        | 38790 | 44000 | Lyth et al., 2012 (697) |
| Radical prostatectomy for localized prostate cancer VERSUS Watchful waiting IN Men aged 65 years with Gleason score between 5-6 and a prostate specific antigen score $\leq 10$ in Sweden   | 8604  | 9800  | Lyth et al., 2012 (697) |
| Radical prostatectomy for localized prostate cancer VERSUS Watchful waiting IN Men aged 70 years with Gleason score between 5-6 and a prostate specific antigen score $\leq 10$ in Sweden   | 22275 | 25000 | Lyth et al., 2012 (697) |

**Appendix**  
**Cost-Utility Analysis of Cancer Prevention, Treatment, and Control: A Systematic Review**  
**Winn et al.**

|                                                                                                                                                                                             |       |       |                         |
|---------------------------------------------------------------------------------------------------------------------------------------------------------------------------------------------|-------|-------|-------------------------|
| Radical prostatectomy for localized prostate cancer VERSUS Watchful waiting IN Men aged 75 years with Gleason score between 5-6 and a prostate specific antigen score $\leq 10$ in Sweden   | 70011 | 80000 | Lyth et al., 2012 (697) |
| Radical prostatectomy for localized prostate cancer VERSUS Watchful waiting IN Men aged 65 years with Gleason score between 5-6 and a prostate specific antigen score between 11-20         | 5995  | 6800  | Lyth et al., 2012 (697) |
| Radical prostatectomy for localized prostate cancer VERSUS Watchful waiting IN Men aged 70 years with Gleason score between 5-6 and prostate specific antigen score between 11-20 in Sweden | 15113 | 17000 | Lyth et al., 2012 (697) |
| Radical prostatectomy for localized prostate cancer VERSUS Watchful waiting IN Men aged 75 years with Gleason score between 5-6 and prostate specific antigen score between 11-20 in Sweden | 42237 | 48000 | Lyth et al., 2012 (697) |
| Radical prostatectomy for localized prostate cancer VERSUS Watchful waiting IN Men aged 65 years with Gleason score between 5-6 and prostate specific antigen score $>20$ in Sweden         | 4819  | 5500  | Lyth et al., 2012 (697) |
| Radical prostatectomy for localized prostate cancer VERSUS Watchful waiting IN Men aged 65 years with Gleason score between 5-6 and prostate specific antigen score $>20$ in Sweden         | 11573 | 13000 | Lyth et al., 2012 (697) |
| Radical prostatectomy for localized prostate cancer VERSUS Watchful waiting IN Men aged 75 years with Gleason score between 5-6 and prostate specific antigen score $>20$ in Sweden         | 29026 | 33000 | Lyth et al., 2012 (697) |
| Radical prostatectomy for localized prostate cancer VERSUS Watchful waiting IN Men aged 65 years with Gleason score of 7 and prostate specific antigen score $<10$ in Sweden                | 6201  | 7100  | Lyth et al., 2012 (697) |
| Radical prostatectomy for localized prostate cancer VERSUS Watchful waiting IN Men aged 70 years with Gleason score of 7 and prostate specific antigen score $<10$ in Sweden                | 14787 | 17000 | Lyth et al., 2012 (697) |

**Appendix**  
**Cost-Utility Analysis of Cancer Prevention, Treatment, and Control: A Systematic Review**  
**Winn et al.**

|                                                                                                                                                                                    |       |       |                         |
|------------------------------------------------------------------------------------------------------------------------------------------------------------------------------------|-------|-------|-------------------------|
| Radical prostatectomy for localized prostate cancer VERSUS Watchful waiting IN Men aged 75 years with Gleason score of 7 and prostate specific antigen score <10 in Sweden         | 36282 | 41000 | Lyth et al., 2012 (697) |
| Radical prostatectomy for localized prostate cancer VERSUS Watchful waiting IN Men aged 65 years with Gleason score of 7 and prostate specific antigen score 11-20 in Sweden       | 5543  | 6300  | Lyth et al., 2012 (697) |
| Radical prostatectomy for localized prostate cancer VERSUS Watchful waiting IN Men aged 70 years with Gleason score of 7 and prostate specific antigen score 11-20 in Sweden       | 12216 | 14000 | Lyth et al., 2012 (697) |
| Radical prostatectomy for localized prostate cancer VERSUS Watchful waiting IN Men aged 75 years with Gleason score of 7 and prostate specific antigen score 11-20 in Sweden       | 26723 | 31000 | Lyth et al., 2012 (697) |
| Radical prostatectomy for localized prostate cancer VERSUS Watchful waiting IN Men aged 65 years with Gleason score of 7 and prostate specific antigen score >20 in Sweden         | 5722  | 6500  | Lyth et al., 2012 (697) |
| Radical prostatectomy for localized prostate cancer VERSUS Watchful waiting IN Men aged 70 years with Gleason score of 7 and prostate specific antigen score >20 in Sweden         | 10359 | 12000 | Lyth et al., 2012 (697) |
| Radical prostatectomy for localized prostate cancer VERSUS Watchful waiting IN Men aged 75 years with Gleason score of 7 and prostate specific antigen score >20 in Sweden         | 20814 | 24000 | Lyth et al., 2012 (697) |
| Radical prostatectomy for localized prostate cancer VERSUS Watchful waiting IN Men aged 65 years with Gleason score bewteen 8-9 and prostate specific antigen score <=10 in Sweden | 7038  | 8000  | Lyth et al., 2012 (697) |
| Radical prostatectomy for localized prostate cancer VERSUS Watchful waiting IN Men aged 70 years with Gleason score bewteen 8-9 and prostate specific antigen score <=10 in Sweden | 13228 | 15000 | Lyth et al., 2012 (697) |
| Radical prostatectomy for localized prostate cancer VERSUS Watchful waiting IN Men aged 75 years with Gleason score bewteen 8-9 and prostate specific antigen score <=10 in Sweden | 26973 | 31000 | Lyth et al., 2012 (697) |

**Appendix**  
**Cost-Utility Analysis of Cancer Prevention, Treatment, and Control: A Systematic Review**  
**Winn et al.**

|                                                                                                                                                                                               |       |       |                                       |
|-----------------------------------------------------------------------------------------------------------------------------------------------------------------------------------------------|-------|-------|---------------------------------------|
| Radical prostatectomy for localized prostate cancer VERSUS Watchful waiting IN Men aged 65 years with Gleason score bewteen 8-9 and prostate specific antigen between 11-20 in Sweden         | 6897  | 7900  | Lyth et al., 2012 (697)               |
| Radical prostatectomy for localized prostate cancer VERSUS Watchful waiting IN Men aged 70 years with Gleason score bewteen 8-9 and prostate specific antigen between 11-20 in Sweden         | 11787 | 13000 | Lyth et al., 2012 (697)               |
| Radical prostatectomy for localized prostate cancer VERSUS Watchful waiting IN Men aged 75 years with Gleason score bewteen 8-9 and prostate specific antigen between 11-20 in Sweden         | 22278 | 25000 | Lyth et al., 2012 (697)               |
| Radical prostatectomy for localized prostate cancer VERSUS Watchful waiting IN Men aged 65 years with Gleason score bewteen 8-9 and prostate specific antigen >20 in Sweden                   | 7358  | 8400  | Lyth et al., 2012 (697)               |
| Radical prostatectomy for localized prostate cancer VERSUS Watchful waiting IN Men aged 70 years with Gleason score bewteen 8-9 and prostate specific antigen >20 in Sweden                   | 11162 | 13000 | Lyth et al., 2012 (697)               |
| Radical prostatectomy for localized prostate cancer VERSUS Watchful waiting IN Men aged 75 years with Gleason score bewteen 8-9 and prostate specific antigen >20 in Sweden                   | 18903 | 22000 | Lyth et al., 2012 (697)               |
| Radical prostatectomy for localized prostate cancer VERSUS Watchful waiting IN Men aged 65 years with Gleason score between 0-4 and prostate specific antigen score <=10 in Sweden            | 10489 | 12000 | Lyth et al., 2012 (697)               |
| Monotherapp (AB: tamsuloosin) VERSUS Watchful waiting (WW) IN Men aged 50 years or older with benign prostatic hyperplasia (BPH) in Norway                                                    | 5943  | 6600  | Bjerklund Johansen et al., 2012 (698) |
| Fixed Dose Combination (FDC)- dutasteride and tamsulosin VERSUS Watchful waiting (WW) IN Men aged 50 years or older with benign prostatic hyperplasia (BPH) in Norway                         | 8489  | 9400  | Bjerklund Johansen et al., 2012 (698) |
| Fixed Dose Combination (FDC)- dutasteride and tamsulosin VERSUS Watchful waiting (WW) IN Men aged 50 years or older with benign prostatic hyperplasia (BPH) in Norway (lifetime time horizon) | 7058  | 7800  | Bjerklund Johansen et al., 2012       |



**Appendix**  
**Cost-Utility Analysis of Cancer Prevention, Treatment, and Control: A Systematic Review**  
**Winn et al.**

(698)

|                                                                                                                                                                                                                                          |        |             |                                       |
|------------------------------------------------------------------------------------------------------------------------------------------------------------------------------------------------------------------------------------------|--------|-------------|---------------------------------------|
| Monotherapy (AB:tamsulosin) VERSUS Watchful waiting (WW) IN Men aged 50 years or older with benign prostatic hyperplasia (BPH) in Norway (lifetime time horizon)                                                                         | 5831   | 6400        | Bjerklund Johansen et al., 2012 (698) |
| Monotherapy (5-ARI:dutasteride) VERSUS Watchful waiting (WW) IN Men aged 50 years or older with benign prostatic hyperplasia (BPH) in Norway (lifetime time horizon)                                                                     | 10137  | 11000       | Bjerklund Johansen et al., 2012 (698) |
| Monotherapy (5-ARI: dutasteride) VERSUS Watchful waiting (WW) IN Men aged 50 years or older with benign prostatic hyperplasia (BPH) in Norway                                                                                            | 12952  | 14000       | Bjerklund Johansen et al., 2012 (698) |
| Prostate specific antigen (PSA) at 2ng/mL threshold value plus Beckman Coulter Prostate Health Index (phi) screening test VERSUS Annual prostate cancer screening using PSA test at 2ng/mL threshold value IN Adult men aged 50-64 years | -26900 | Cost-Saving | Nichol et al., 2012 (699)             |
| Prostate specific antigen (PSA) at 2ng/mL threshold value plus Beckman Coulter Prostate Health Index (phi) screening test VERSUS Annual prostate cancer screening using PSA test at 2ng/mL threshold value IN Adult men aged 65-75 years | -41600 | Cost-Saving | Nichol et al., 2012 (699)             |
| Prostate specific antigen (PSA) at 4ng/mL threshold value plus Beckman Coulter Prostate Health Index (phi) screening test VERSUS Annual prostate cancer screening using PSA test at 4ng/mL threshold value IN Adult men aged 50-75 years | -14767 | Cost-Saving | Nichol et al., 2012 (699)             |
| Prostate specific antigen (PSA) at 4ng/mL threshold value plus Beckman Coulter Prostate Health Index (phi) screening test VERSUS Annual prostate cancer screening using PSA test at 4ng/mL threshold value IN Adult men aged 50-64 years | -20100 | Cost-Saving | Nichol et al., 2012 (699)             |

**Appendix**  
**Cost-Utility Analysis of Cancer Prevention, Treatment, and Control: A Systematic Review**  
**Winn et al.**

|                                                                                                                                                                                                                                                                                                             |         |                                      |                            |
|-------------------------------------------------------------------------------------------------------------------------------------------------------------------------------------------------------------------------------------------------------------------------------------------------------------|---------|--------------------------------------|----------------------------|
| Prostate specific antigen (PSA) at 4ng/mL threshold value plus Beckman Coulter Prostate Health Index (phi) screening test VERSUS Annual prostate cancer screening using PSA test at 4ng/mL threshold value IN Adult men aged 65-75 years                                                                    | -34300  | Cost-Saving                          | Nichol et al., 2012 (699)  |
| Prostate specific antigen (PSA) plus Beckman Coulter Prostate Health Index (phi) screening test VERSUS Annual prostate cancer screening using PSA test IN Adult men aged 50-75 years                                                                                                                        | -14988  | Cost-Saving                          | Nichol et al., 2012 (699)  |
| Stereotactic beam radiation therapy (SBRT) VERSUS Intensity-modulated radiation therapy (IMRT) IN Men aged 70 years with low or intermediate-risk limited organ-confined prostate cancer                                                                                                                    |         | Cost-Saving                          | Hodges et al., 2012 (700)  |
| Chemoprevention with finasteride beginning at age 50 until age 75 with a constant risk reduction across all tumor grades VERSUS No chemoprevention with finasteride IN US men aged 50 years                                                                                                                 | 88805   | 98000                                | Stewart et al., 2012 (701) |
| Chemoprevention with finasteride beginning at age 50 until age 75 with tumor-grade specific treatment effects (risk of low-grade tumors decreased by 38.2% and the risk of intermediate- and high-grade tumors increased by 23% and 67%) VERSUS No chemoprevention with finasteride IN US men aged 50 years | 142300  | 160000                               | Stewart et al., 2012 (701) |
| Intensity-modulated radiation therapy (IMRT) VERSUS Stereotactic body radiation therapy (SBRT) IN Males aged 65 years with localized prostate cancer who declined or were ineligible for surgery: healthcare perspective                                                                                    | -136583 | Increases Costs,<br>Decreases Health | Parthan et al., 2012 (702) |
| Proton beam therapy ( PT) VERSUS Intensity-modulated radiation therapy (IMRT) IN Males aged 65 years with localized prostate cancer who declined or were ineligible for surgery: healthcare perspective                                                                                                     | 3634400 | 3800000                              | Parthan et al., 2012 (702) |

**Appendix**  
**Cost-Utility Analysis of Cancer Prevention, Treatment, and Control: A Systematic Review**  
**Winn et al.**

|                                                                                                                                                                                                                        |         |                                            |                            |
|------------------------------------------------------------------------------------------------------------------------------------------------------------------------------------------------------------------------|---------|--------------------------------------------|----------------------------|
| Intensity-modulated radiation therapy (IMRT) VERSUS Stereotactic body radiation therapy (SBRT) IN Males aged 65 years with localized prostate cancer who declined or were ineligible for surgery: societal perspective | -166517 | Increases<br>Costs,<br>Decreases<br>Health | Parthan et al., 2012 (702) |
| Proton beam therapy (PT) VERSUS Stereotactic body radiation therapy (SBRT) IN Males aged 65 years with localized prostate cancer who declined or were ineligible for surgery: societal perspective                     | -931200 | Increases<br>Costs,<br>Decreases<br>Health | Parthan et al., 2012 (702) |
| Proton beam therapy (PT) VERSUS Intensity-modulated radiation therapy (IMRT) IN Males aged 65 years with localized prostate cancer who declined or were ineligible for surgery: societal perspective                   | 3656900 | 3800000                                    | Parthan et al., 2012 (702) |
| Proton beam therapy (PT) VERSUS stereotactic body radiation therapy (SBRT) IN Males aged 65 years with localized prostate cancer who declined or were ineligible for surgery: healthcare perspective                   | -890780 | Increases<br>Costs,<br>Decreases<br>Health | Parthan et al., 2012 (702) |
| Intensity-modulated radiation therapy VERSUS Stereotactic body radiation therapy IN US patients aged 70 years-old with prostate cancer                                                                                 |         | Increases<br>Costs,<br>Decreases<br>Health | Hodges et al., 2012 (703)  |
| Short-tandem repeat-based provenance testing of transrectal prostate biopsy specimens to rule out the presence of adenocarcinoma of the prostate VERSUS None IN Patients with prostate cancer                          | 65570   | 72000                                      | Pfeifer et al., 2012 (704) |
| Abiraterone + prednisolone VERSUS Prednisolone IN Patients with castration-resistant metastatic prostate cancer previously treated with docetaxel-containing regimen                                                   | 81591   | 89000                                      | Dyer et al., 2012 (705)    |

**Appendix**  
**Cost-Utility Analysis of Cancer Prevention, Treatment, and Control: A Systematic Review**  
**Winn et al.**

|                                                                                                                                                                                                                                                                  |         |             |                             |
|------------------------------------------------------------------------------------------------------------------------------------------------------------------------------------------------------------------------------------------------------------------|---------|-------------|-----------------------------|
| Abiraterone + prednisolone VERSUS Prednisolone IN Patients with castration-resistant metastatic prostate cancer previously treated with docetaxel-containing regimen and who received a previous course of chemotherapy                                          | 72249   | 78000       | Dyer et al., 2012 (705)     |
| Intensity-modulated radiotherapy (IMRT) VERSUS 3-dimensional conformal radiotherapy (3DCRT) IN UK men aged 70 years with localised prostate cancer (equal doses of radiotherapy to both IMRT and 3DCRT patients and same PSA progression rates for both cohorts) | 150680  | 170000      | Hummel et al., 2012 (706)   |
| Intensity-modulated radiotherapy (IMRT) VERSUS 3-dimensional conformal radiotherapy (3DCRT) IN UK men aged 70 years with localised prostate cancer (same survival rates for both cohorts with difference of 15% in late gastrointestinal toxicity)               | 45120   | 50000       | Hummel et al., 2012 (706)   |
| Intensity-modulated radiotherapy (IMRT) VERSUS 3-dimensional conformal radiotherapy (3DCRT) IN UK men aged 70 years with localised prostate cancer (smaller difference between IMRT and 3DCRT in mean survival to PSA failure of 3.8 years)                      | 7667    | 8500        | Hummel et al., 2012 (706)   |
| Intensity-modulated radiotherapy (IMRT) VERSUS 3-dimensional conformal radiotherapy (3DCRT) IN UK men aged 70 years with localised prostate cancer (difference between IMRT and 3DCRT in mean survival is 6.6 years)                                             | -4256   | Cost-Saving | Hummel et al., 2012 (706)   |
| Intensity-modulated radiation therapy (IMRT) VERSUS Non-Robotic Stereotactic body radiotherapy (NR-SBRT) IN Patients aged over 65 years with low-risk prostate cancer (LRPCA)                                                                                    | 591100  | 610000      | Sher et al., 2012 (707)     |
| Intensity-modulated radiation therapy (IMRT) VERSUS Robotic Stereotactic body radiotherapy (R-SBRT) IN Patients aged over 65 years with low-risk prostate cancer (LRPCA)                                                                                         | 285000  | 290000      | Sher et al., 2012 (707)     |
| Denosumab (120mg monthly) VERSUS Zoledronic acid (4mg monthly) IN Specific disease- Bone-metastatic prostate cancer; Age- Adult; Gender- Male; Country- United States.                                                                                           | 1058741 | 1100000     | Snedecor et al., 2013 (708) |

**Appendix**  
**Cost-Utility Analysis of Cancer Prevention, Treatment, and Control: A Systematic Review**  
**Winn et al.**

|                                                                                                                                                                                                                                                         |       |       |                               |
|---------------------------------------------------------------------------------------------------------------------------------------------------------------------------------------------------------------------------------------------------------|-------|-------|-------------------------------|
| External-beam radiation therapy (EBRT) + brachytherapy (BT) VERSUS Active surveillance IN Specific disease- prostate cancer; Age- Adult; Gender- Male; Country- United States.                                                                          | 4313  | 4800  | Cooperberg et al., 2013 (709) |
| Brachytherapy (BT) VERSUS Active surveillance IN Specific disease- prostate cancer; Age- Adult; Gender- Male; Country- .                                                                                                                                | 3391  | 3700  | Cooperberg et al., 2013 (709) |
| Three-dimensional conformal RT (3DCRT) VERSUS Active surveillance IN Specific disease- prostate cancer; Age- Adult; Gender- Male; Country- United States.                                                                                               | 3179  | 3500  | Cooperberg et al., 2013 (709) |
| Intensity-modulated radiation therapy (IMRT) VERSUS Active surveillance IN Specific disease- prostate cancer; Age- Adult; Gender- Male; Country- United States.                                                                                         | 6469  | 7100  | Cooperberg et al., 2013 (709) |
| Open radical prostatectomy (ORP) VERSUS Active surveillance IN Specific disease- prostate cancer; Age- Adult; Gender- Male; Country- United States.                                                                                                     | 2749  | 3000  | Cooperberg et al., 2013 (709) |
| Robot-assisted radical prostatectomy (RARP) VERSUS Active surveillance IN Specific disease- prostate cancer; Age- Adult; Gender- Male; Country- United States.                                                                                          | 2668  | 2900  | Cooperberg et al., 2013 (709) |
| Laparoscopic assisted radical prostatectomy (LRP) VERSUS Active surveillance IN Specific disease- prostate cancer; Age- Adult; Gender- Male; Country- United States.                                                                                    | 2792  | 3100  | Cooperberg et al., 2013 (709) |
| Single-dose tamsulosin and dutasteride combination therapy VERSUS Tamsulosin monotherapy IN Specific disease- Benign prostatic hyperplasia; Age- 41 to 64 years, >=65 years; Gender- Male; Country- United Kingdom; Other- moderate to severe symptoms. | 19603 | 21000 | Walker et al., 2013 (710)     |
| Robot-assisted prostatectomy VERSUS Laproscopic prostatectomy IN Specific disease- Localized prostate cancer; Age- 19 to 40 years, 41 to 64 years, Adult; Gender- Male; Country- United Kingdom.                                                        | 26539 | 29000 | Close et al., 2013 (711)      |

**Appendix**  
**Cost-Utility Analysis of Cancer Prevention, Treatment, and Control: A Systematic Review**  
**Winn et al.**

|                                                                                                                                                                             |        |                                   |                           |
|-----------------------------------------------------------------------------------------------------------------------------------------------------------------------------|--------|-----------------------------------|---------------------------|
| Degarelix 240/80 mg VERSUS Leuprolide 22.5 mg every 3 months IN Specific disease- Locally advanced prostate cancer; Age- Adult; Gender- Male; Country- United States.       | 245    | 260                               | Hatoum et al., 2013 (712) |
| Cabazitaxel VERSUS abiraterone IN Specific disease- Prostate Cancer; Age- Adult; Gender- Male; Country- United States.                                                      | 955863 | 1000000                           | Zhong et al., 2013 (713)  |
| Abiraterone VERSUS mitoxantrone IN Specific disease- Prostate Cancer; Age- Adult; Gender- Male; Country- United States.                                                     | 91118  | 99000                             | Zhong et al., 2013 (713)  |
| Mitoxantrone VERSUS Placebo IN Specific disease- Prostate Cancer; Age- Adult; Gender- Male; Country- United States.                                                         | 100675 | 110000                            | Zhong et al., 2013 (713)  |
| Prostate-specific antigen screening VERSUS None IN Healthy; Age- 41 to 64 years; Gender- Male; Country- Australia; Other- Average risk for prostate cancer.                 | 302282 | 310000                            | Martin et al., 2013 (714) |
| Prostate-specific antigen screening VERSUS None IN Healthy; Age- 41 to 64 years; Gender- Male; Country- Australia; Other- High risk for prostate cancer.                    | 114700 | 120000                            | Martin et al., 2013 (714) |
| Prostate-specific antigen screening VERSUS None IN Healthy; Age- 41 to 64 years; Gender- Male; Country- Australia; Other- Very high risk for prostate cancer.               | 31668  | 33000                             | Martin et al., 2013 (714) |
| Brachytherapy VERSUS Watchful waiting IN Specific disease- prostate cancer; Age-; Gender- Male; Country- United States; Other- localized, low-risk prostate cancer.         | -12334 | Increases Costs, Decreases Health | Hayes et al., 2013 (715)  |
| Radical prostatectomy VERSUS Watchful waiting IN Specific disease- prostate cancer; Age-; Gender- Male; Country- United States; Other- localized, low-risk prostate cancer. | -12766 | Increases Costs, Decreases Health | Hayes et al., 2013 (715)  |

**Appendix**  
**Cost-Utility Analysis of Cancer Prevention, Treatment, and Control: A Systematic Review**  
**Winn et al.**

|                                                                                                                                                                                               |        |                                            |                            |
|-----------------------------------------------------------------------------------------------------------------------------------------------------------------------------------------------|--------|--------------------------------------------|----------------------------|
| Active surveillance VERSUS Watchful waiting IN Specific disease- prostate cancer; Age-; Gender- Male; Country- United States; Other- localized, low-risk prostate cancer.                     | -90435 | Increases<br>Costs,<br>Decreases<br>Health | Hayes et al., 2013 (715)   |
| VERSUS watchful waiting IN Specific disease- prostate cancer; Age-; Gender- Male; Country- United States; Other- localized, low-risk prostate cancer.                                         | -26282 | Increases<br>Costs,<br>Decreases<br>Health | Hayes et al., 2013 (715)   |
| Intensity-modulated radiation therapy VERSUS Watchful waiting IN Specific disease- prostate cancer; Age-; Gender- Male; Country- United States; Other- localized, low-risk prostate cancer.   | -38684 | Increases<br>Costs,<br>Decreases<br>Health | Hayes et al., 2013 (715)   |
| VERSUS Watchful waiting IN Specific disease- prostate cancer; Age-; Gender- Male; Country- United States; Other- localized, low-risk prostate cancer.                                         | -18117 | Increases<br>Costs,<br>Decreases<br>Health | Hayes et al., 2013 (715)   |
| Active surveillance for prostate cancer VERSUS Watchful waiting IN Specific disease- prostate cancer; Age-; Gender- Male; Country- United States; Other- localized, low-risk prostate cancer. | -73413 | Increases<br>Costs,<br>Decreases<br>Health | Hayes et al., 2013 (715)   |
| Dutasteride-tamsulosin combination VERSUS Tamsulosin IN Specific disease- Benign prostatic hyperplasia; Age- Adult; Gender- Male; Country- Canada.                                            | 25745  | 27000                                      | Ismaila et al., 2013 (716) |
| Abiraterone VERSUS Placebo IN Specific disease- metastatic castration-resistant prostate cancer; Age- Adult; Gender- Male; Country- United States.                                            | 123430 | 130000                                     | Wilson et al., 2013 (717)  |
| Enzalutamide VERSUS Abiraterone IN Specific disease- metastatic castration-resistant prostate cancer; Age- Adult; Gender- Male; Country- United States.                                       | 437623 | 450000                                     | Wilson et al., 2013 (717)  |

**Appendix**  
**Cost-Utility Analysis of Cancer Prevention, Treatment, and Control: A Systematic Review**  
**Winn et al.**

|                                                                                                                                                        |        |        |                             |
|--------------------------------------------------------------------------------------------------------------------------------------------------------|--------|--------|-----------------------------|
| Cabazitaxel VERSUS Abiraterone IN Specific disease- metastatic castration-resistant prostate cancer; Age- Adult; Gender- Male; Country- United States. | 351865 | 360000 | Wilson et al., 2013 (717)   |
| Magnetic resonance imaging VERSUS transrectal ultrasound-guided biopsy IN Healthy; Age- Adult; Gender- Male; Country- Netherlands.                     | 449    | 470    | de Rooij et al., 2013 (718) |

### Stomach Cancer

| Description                                         | Original US\$/QALY | 2014US\$/QALY | Reference                 |
|-----------------------------------------------------|--------------------|---------------|---------------------------|
| VERSUS IN Singapore chinese men between 50-70 years | 27000              | 35000         | Dan YY et al., 2006 (719) |

### Uterine Cancer

| Description                                                                                                                                                                                                                                                                                                                                                                                                                                                                                                                                                                                                                           | Original US\$/QALY | 2014US\$/QALY | Reference                  |
|---------------------------------------------------------------------------------------------------------------------------------------------------------------------------------------------------------------------------------------------------------------------------------------------------------------------------------------------------------------------------------------------------------------------------------------------------------------------------------------------------------------------------------------------------------------------------------------------------------------------------------------|--------------------|---------------|----------------------------|
| Surgical staging (HBSO and pelvic +/- para-aortic lymphadenectomy); Adjuvant radiotherapy (RT) administered according to final grade and stage; After staging, pelvic RT was indicated for Grades 1 and 2 if Stage IIB and for Grade 3 if Stage IC, IIA with >50% MI, or IIB VERSUS Hysterectomy and bilateral salpingo-oophorectomy (HBSO); Adjuvant radiotherapy (RT) administered according to final grade and stage; After HBSO, pelvic RT indicated for Grades 1 and 2 if Stage IC, IIA with >50% myometrial invasion (MI) or IIB, and for Grade 3 if Stage IB, IC, IIA, or IIB IN Stage I, II endometrioid-type cancer; Grade 1 | Dominated          | Dominated     | Kwon JS et al., 2007 (720) |
| Surgical staging (HBSO and pelvic +/- para-aortic lymphadenectomy); Adjuvant radiotherapy (RT) administered according to final grade and stage; After staging, pelvic RT was indicated for Grades 1 and 2 if Stage IIB and for Grade 3 if Stage IC, IIA with >50% MI, or IIB VERSUS Hysterectomy and                                                                                                                                                                                                                                                                                                                                  | 4000               | 5000          | Kwon JS et al., 2007 (720) |



**Appendix**  
**Cost-Utility Analysis of Cancer Prevention, Treatment, and Control: A Systematic Review**  
**Winn et al.**

|                                                                                                                                                                                                                                                                                                                                                                                                                                                                                                                                                                                                                                                    |                  |                  |                                   |
|----------------------------------------------------------------------------------------------------------------------------------------------------------------------------------------------------------------------------------------------------------------------------------------------------------------------------------------------------------------------------------------------------------------------------------------------------------------------------------------------------------------------------------------------------------------------------------------------------------------------------------------------------|------------------|------------------|-----------------------------------|
| <p>bilateral salpingo-oophorectomy (HBSO); Adjuvant radiotherapy (RT) administered according to final grade and stage; After HBSO, pelvic RT indicated for Grades 1 and 2 if Stage IC, IIA with &gt;50% myometrial invasion (MI) or IIB, and for Grade 3 if Stage IB, IC, IIA, or IIB IN Stage I, II endometrioid-type cancer; Grade 2</p>                                                                                                                                                                                                                                                                                                         |                  |                  |                                   |
| <p>Surgical staging (HBSO and pelvic +/- para-aortic lymphadenectomy); Adjuvant radiotherapy (RT) administered according to final grade and stage; After staging, pelvic RT was indicated for Grades 1 and 2 if Stage IIB and for Grade 3 if Stage IC, IIA with &gt;50% MI, or IIB VERSUS Hysterectomy and bilateral salpingo-oophorectomy (HBSO); Adjuvant radiotherapy (RT) administered according to final grade and stage; After HBSO, pelvic RT indicated for Grades 1 and 2 if Stage IC, IIA with &gt;50% myometrial invasion (MI) or IIB, and for Grade 3 if Stage IB, IC, IIA, or IIB IN Stage I, II endometrioid-type cancer; Grade 3</p> | <p>Dominated</p> | <p>Dominated</p> | <p>Kwon JS et al., 2007 (720)</p> |

## Citations

1. Robinson et al. Cost-utility analysis of the GC versus MVAC regimens for the treatment of locally advanced or metastatic bladder cancer.. *Expert Rev Pharmacoecon Outcomes Res* 2004; 4(1);27-38.
2. Kulkarni et al. Cost-effectiveness analysis of immediate radical cystectomy versus intravesical Bacillus Calmette-Guerin therapy for high-risk, high-grade (T1G3) bladder cancer.. *Cancer* 2009; ();.
3. Green et al. Cost-effective treatment of low-risk carcinoma not invading bladder muscle.. *BJU Int* 2012; ();.
4. Lee et al. Economic and humanistic consequences of preventable bladder tumor recurrences in nonmuscle invasive bladder cancer cases.. *J Urol* 2012; 188(6);2114-9.
5. Wong et al. Outpatient laser ablation of non-muscle-invasive bladder cancer: is it safe, tolerable and cost-effective?. *BJU Int* 2013; 112(5);561-7.
6. Mehta et al. A cost-effectiveness and cost-utility analysis of radiosurgery vs. resection for single-brain metastases.. *Int J Radiat Oncol Biol Phys* 1997; 39(2);445-54.
7. Medina et al. Children with headache suspected of having a brain tumor: a cost-effectiveness analysis of diagnostic strategies.. *Pediatrics* 2001; 108(2);255-63.
8. Chau et al. Cost-effectiveness of the bird's nest filter for preventing pulmonary embolism among patients with malignant brain tumors and deep venous thrombosis of the lower extremities.. *Support Care Cancer* 2003; 11(12);795-9.
9. Lundkvist et al. Cost-effectiveness of proton radiation in the treatment of childhood medulloblastoma.. *Cancer* 2005; 103(4);793-801.
10. Martikainen et al. Economic evaluation of temozolomide in the treatment of recurrent glioblastoma multiforme.. *Pharmacoeconomics* 2005; 23(8);803-15.
11. Rogers et al. Carmustine implants for the treatment of newly diagnosed high-grade gliomas: a cost-utility analysis.. *Pharmacoeconomics* 2008; 26(1);33-44.
12. Lee et al. Outcomes and cost-effectiveness of gamma knife radiosurgery and whole brain radiotherapy for multiple metastatic brain tumors.. *J Clin Neurosci* 2009; 16(5);630-4.
13. Lal et al. Cost-effectiveness Analysis of a Randomized Study Comparing Radiosurgery With Radiosurgery and Whole Brain Radiation Therapy in Patients With 1 to 3 Brain Metastases.. *Am J Clin Oncol* 2011; ();.
14. Wu et al. Subgroup economic analysis for glioblastoma in a health resource-limited setting.. *PLoS One* 2012; 2(1);e34588.
15. Martino et al. Cost-utility of maximal safe resection of WHO grade II gliomas within eloquent areas.. *Acta Neurochir (Wien)* 2013; 155(1);41-50.
16. Messali et al. The cost-effectiveness of temozolomide in the adjuvant treatment of newly diagnosed glioblastoma in the United States.. *Neuro Oncol* 2013; 15(11);1532-42.
17. Mailhot Vega et al. Cost effectiveness of proton therapy compared with photon therapy in the management of pediatric medulloblastoma.. *Cancer* 2013; 119(24);4299-307.
18. Hillner et al. Efficacy and cost effectiveness of adjuvant chemotherapy in women with node-negative breast cancer. A decision-analysis model.. *N Engl J Med* 1991; 324(3);160-8.
19. de Koning et al. Breast cancer screening and cost-effectiveness; policy alternatives, quality of life considerations and the possible impact of uncertain factors.. *Int J Cancer* 1991; 49(4);531-7.
20. Hillner et al. Efficacy and cost-effectiveness of autologous bone marrow transplantation in metastatic breast cancer. Estimates using decision analysis while awaiting clinical trial results.. *JAMA* 1992; 267(15);2055-61.
21. Hillner et al. A model of chemotherapy in node-negative breast cancer.. *J Natl Cancer Inst Monogr* 1992; (11);143-9.

22. Hillner et al. Assessing the cost effectiveness of adjuvant therapies in early breast cancer using a decision analysis model.. *Breast Cancer Res Treat* 1993; 25(2);97-105.
23. Smith et al. The efficacy and cost-effectiveness of adjuvant therapy of early breast cancer in premenopausal women.. *J Clin Oncol* 1993; 11(4);771-6.
24. Desch et al. Should the elderly receive chemotherapy for node-negative breast cancer? A cost-effectiveness analysis examining total and active life-expectancy outcomes.. *J Clin Oncol* 1993; 11(4);777-82.
25. Velanovich et al. Immediate biopsy versus observation for abnormal findings on mammograms: an analysis of potential outcomes and costs.. *Am J Surg* 1995; 170(4);327-32.
26. Boer et al. In search of the best upper age limit for breast cancer screening.. *Eur J Cancer* 1995; 31A(12);2040-3.
27. Hutton et al. A new decision model for cost-utility comparisons of chemotherapy in recurrent metastatic breast cancer.. *Pharmacoeconomics* 1996; 9 Suppl 2();42238.
29. Hristova et al. Effect of screening for cancer in the Nordic countries on deaths, cost and quality of life up to the year 2017.. *Acta Oncol* 1997; 36 Suppl 9();21916.
30. Norum et al. Lumpectomy or mastectomy? Is breast conserving surgery too expensive?. *Breast Cancer Res Treat* 1997; 45(1);42199.
31. Liljegren et al. The cost-effectiveness of routine postoperative radiotherapy after sector resection and axillary dissection for breast cancer stage I. Results from a randomized trial.. *Ann Oncol* 1997; 8(8);757-63.
32. Grann et al. Decision analysis of prophylactic mastectomy and oophorectomy in BRCA1-positive or BRCA2-positive patients.. *J Clin Oncol* 1998; 16(3);979-85.
33. Hayman et al. Cost-effectiveness of routine radiation therapy following conservative surgery for early-stage breast cancer.. *J Clin Oncol* 1998; 16(3);1022-9.
34. Brown et al. Cost-utility model comparing docetaxel and paclitaxel in advanced breast cancer patients.. *Anticancer Drugs* 1998; 9(10);899-907.
35. Dranitsaris et al. Cost utility analysis of prophylactic pamidronate for the prevention of skeletal related events in patients with advanced breast cancer.. *Support Care Cancer* 1999; 7(4);271-9.
36. Orr et al. A cost-effectiveness analysis of axillary node dissection in postmenopausal women with estrogen receptor-positive breast cancer and clinically negative axillary nodes.. *Surgery* 1999; 126(3);568-76.
37. Leung et al. Cost-utility analysis of chemotherapy using paclitaxel, docetaxel, or vinorelbine for patients with anthracycline-resistant breast cancer.. *J Clin Oncol* 1999; 17(10);3082-90.
38. Hrung et al. Cost-effectiveness of MR imaging and core-needle biopsy in the preoperative work-up of suspicious breast lesions.. *Radiology* 1999; 213(1);39-49.
39. Tengs et al. The cost effectiveness of testing for the BRCA1 and BRCA2 breast-ovarian cancer susceptibility genes.. *Dis. Manag. Clin. Outcomes* 2000; 1();15-24.
40. Hillner et al. Pamidronate in prevention of bone complications in metastatic breast cancer: a cost-effectiveness analysis.. *J Clin Oncol* 2000; 18(1);72-9.
41. Hayman et al. Cost-effectiveness of adding an electron-beam boost to tangential radiation therapy in patients with negative margins after conservative surgery for early-stage breast cancer.. *J Clin Oncol* 2000; 18(2);287-95.
42. Grann et al. Prevention with tamoxifen or other hormones versus prophylactic surgery in BRCA1/2-positive women: a decision analysis.. *Cancer J Sci Am* 2000; 6(1);13-20.
43. Grann et al. Decision analysis of tamoxifen for the prevention of invasive breast cancer.. *Cancer J* 2000; 6(3);169-78.
44. Dranitsaris et al. Cost-utility analysis of second-line hormonal therapy in advanced breast cancer: a comparison of two aromatase inhibitors to megestrol acetate.. *Anticancer Drugs* 2000; 11(7);591-

601.

45. Dunscombe et al. A cost-outcome analysis of adjuvant postmastectomy locoregional radiotherapy in premenopausal node-positive breast cancer patients.. *Int J Radiat Oncol Biol Phys* 2000; 48(4);977-82.
46. Li et al. A cost-utility analysis comparing second-line chemotherapy schemes in patients with metastatic breast cancer.. *Anticancer Drugs* 2001; 12(6);533-40.
47. Brown et al. Cost effectiveness of treatment options in advanced breast cancer in the UK.. *Pharmacoeconomics* 2001; 19(11);1091-102.
48. Armstrong et al. Cost-effectiveness of raloxifene and hormone replacement therapy in postmenopausal women: impact of breast cancer risk.. *Obstet Gynecol* 2001; 98(6);996-1003.
49. Hershman et al. Outcomes of tamoxifen chemoprevention for breast cancer in very high-risk women: a cost-effectiveness analysis.. *J Clin Oncol* 2002; 20(1);422-63.
50. Karnon et al. Tamoxifen plus chemotherapy versus tamoxifen alone as adjuvant therapies for node-positive postmenopausal women with early breast cancer: a stochastic economic evaluation.. *Pharmacoeconomics* 2002; 20(14);119-37.
51. Lee et al. Decision-analytic model and cost-effectiveness evaluation of postmastectomy radiation therapy in high-risk premenopausal breast cancer patients.. *J Clin Oncol* 2002; 20(11);2713-25.
52. Malin et al. Using cost-effectiveness analysis to define a breast cancer benefits package for the uninsured.. *Breast Cancer Res Treat* 2002; 74(2);143-53.
53. Polsky et al. Economic evaluation of breast cancer treatment: considering the value of patient choice.. *J Clin Oncol* 2003; 21(6);1139-46.
54. Karnon et al. A stochastic economic evaluation of letrozole versus tamoxifen as a first-line hormonal therapy: for advanced breast cancer in postmenopausal patients.. *Pharmacoeconomics* 2003; 21(16);513-25.
55. Dranitsaris et al. Cost utility analysis of first-line hormonal therapy in advanced breast cancer: comparison of two aromatase inhibitors to tamoxifen.. *Am J Clin Oncol* 2003; 26(3);289-96.
56. Thoma et al. Cost-utility analysis comparing free and pedicled TRAM flap for breast reconstruction.. *Microsurgery* 2003; 23(4);287-95.
57. Karnon et al. A trial-based cost-effectiveness analysis of letrozole followed by tamoxifen versus tamoxifen followed by letrozole for postmenopausal advanced breast cancer.. *Ann Oncol* 2003; 14(11);1629-33.
58. Eckermann et al. The benefits and costs of tamoxifen for breast cancer prevention.. *Aust N Z J Public Health* 2003; 27(1);34-40.
59. Elkin et al. HER-2 testing and trastuzumab therapy for metastatic breast cancer: a cost-effectiveness analysis.. *J Clin Oncol* 2004; 22(5);854-63.
60. Cykert et al. Tamoxifen for breast cancer prevention: a framework for clinical decisions.. *Obstet Gynecol* 2004; 104(3);433-42.
61. Hillner et al. Benefit and projected cost-effectiveness of anastrozole versus tamoxifen as initial adjuvant therapy for patients with early-stage estrogen receptor-positive breast cancer.. *Cancer* 2004; 101(6);1311-22.
62. Marchetti et al. Cost utility and budget impact of third-generation aromatase inhibitors for advanced breast cancer: a literature-based model analysis of costs in the Italian National Health Service.. *Clin Ther* 2004; 26(9);1546-61.
63. Naeim et al. Is adjuvant therapy for older patients with node (-) early breast cancer cost-effective?. *Crit Rev Oncol Hematol* 2005; 53(1);81-9.
64. Suh et al. Cost-effectiveness of radiation therapy following conservative surgery for ductal carcinoma in situ of the breast.. *Int J Radiat Oncol Biol Phys* 2005; 61(4);1054-61.

65. De Cock et al. Cost-effectiveness of oral ibandronate compared with intravenous (i.v.) zoledronic acid or i.v. generic pamidronate in breast cancer patients with metastatic bone disease undergoing i.v. chemotherapy.. *Support Care Cancer* 2005; ();
66. Lundkvist et al. Economic evaluation of proton radiation therapy in the treatment of breast cancer.. *Radiother Oncol* 2005; 75(2);179-85.
67. Verma et al. Capecitabine plus docetaxel combination therapy.. *Cancer* 2005; 103(12);2455-65.
68. Hornberger et al. Economic analysis of targeting chemotherapy using a 21-gene RT-PCR assay in lymph-node-negative, estrogen-receptor-positive, early-stage breast cancer.. *Am J Manag Care* 2005; 11(5);313-24.
69. De Cock et al. Cost-effectiveness of oral ibandronate versus IV zoledronic acid or IV pamidronate for bone metastases in patients receiving oral hormonal therapy for breast cancer in the United Kingdom.. *Clin Ther* 2005; 27(8);1295-310.
70. Lievens et al. Economic consequence of local control with radiotherapy: cost analysis of internal mammary and medial supraclavicular lymph node radiotherapy in breast cancer.. *Int J Radiat Oncol Biol Phys* 2005; 63(4);1122-31.
71. Naeim et al. Is Adjuvant Therapy for Older Patients with Node (+) Early Breast Cancer cost-effective?\*. *Breast Cancer Res Treat* 2005; 94(2);95-103.
72. Gordon et al. A Cost-effectiveness Analysis of Two Rehabilitation Support Services for Women with Breast Cancer.. *Breast Cancer Res Treat* 2005; 94(2);123-33.
73. Lundkvist et al. Proton therapy of cancer: potential clinical advantages and cost-effectiveness.. *Acta Oncol* 2005; 44(8);850-61.
74. Lønning et al. Comparing cost/utility of giving an aromatase inhibitor as monotherapy for 5 years versus sequential administration following 2-3 or 5 years of tamoxifen as adjuvant treatment for postmenopausal breast cancer.. *Ann Oncol* 2006; 17(2);217-25.
75. Karnon et al. Cost effectiveness of extended adjuvant letrozole in postmenopausal women after adjuvant tamoxifen therapy: the UK perspective.. *Pharmacoeconomics* 2006; 24(3);237-50.
76. Rocchi et al. Anastrozole is cost-effective vs tamoxifen as initial adjuvant therapy in early breast cancer: Canadian perspectives on the ATAC completed-treatment analysis.. *Support Care Cancer* 2006; 14(9);917-27.
77. Botteman et al. Cost effectiveness of bisphosphonates in the management of breast cancer patients with bone metastases.. *Ann Oncol* 2006; 17(7);1072-82.
78. Plevritis et al. Cost-effectiveness of screening BRCA1/2 mutation carriers with breast magnetic resonance imaging.. *JAMA* 2006; 295(20);2374-84.
79. Limwattananon et al. Cost-effectiveness analysis of sequential paclitaxel adjuvant chemotherapy for patients with node positive primary breast cancer.. *J Med Assoc Thai* 2006; 89(5);690-8.
80. Stout et al. Retrospective cost-effectiveness analysis of screening mammography.. *J Natl Cancer Inst* 2006; 98(11);774-82.
81. Gil et al. Pharmacoeconomic analysis of adjuvant therapy with exemestane, anastrozole, letrozole or tamoxifen in postmenopausal women with operable and estrogen receptor-positive breast cancer.. *Clin Transl Oncol* 2006; 8(5);339-48.
82. Fagnoni et al. Clinical and economic impact of epoetin in adjuvant-chemotherapy for breast cancer.. *Support Care Cancer* 2006; 14(10);1030-7.
83. Delea et al. Cost-effectiveness of extended adjuvant letrozole therapy after 5 years of adjuvant tamoxifen therapy in postmenopausal women with early-stage breast cancer.. *Am J Manag Care* 2006; 12(7);374-86.
84. Moeremans et al. Cost-effectiveness of anastrozole compared to tamoxifen in hormone receptor-positive early breast cancer. Analysis based on the ATAC trial.. *Int J Gynecol Cancer* 2006; 16 Suppl 2();576-8.

85. Jeruss et al. Is intraoperative touch imprint cytology of sentinel lymph nodes in patients with breast cancer cost effective?. *Cancer* 2006; 107(10);2328-36.
86. El Ouagari et al. Cost-effectiveness of letrozole in the extended adjuvant treatment of women with early breast cancer.. *Breast Cancer Res Treat* 2007; 101(1);37-49.
87. Skedgel et al. Cost-utility of adjuvant hormone therapies for breast cancer in post-menopausal women: sequential tamoxifen-exemestane and upfront anastrozole.. *Breast Cancer Res Treat* 2007; 101(3);325-33.
88. Lundkvist et al. Cost-effectiveness of exemestane versus tamoxifen as adjuvant therapy for early-stage breast cancer after 2-3 years treatment with tamoxifen in Sweden.. *Breast Cancer Res Treat* 2007; 102(3);289-99.
89. Skedgel et al. Cost-utility of adjuvant hormone therapies with aromatase inhibitors in post-menopausal women with breast cancer: upfront anastrozole, sequential tamoxifen-exemestane and extended tamoxifen-letrozole.. *Breast* 2007; 16(3);252-61.
90. Locker et al. Cost-effectiveness analysis of anastrozole versus tamoxifen as primary adjuvant therapy for postmenopausal women with early breast cancer: a US healthcare system perspective. The 5-year completed treatment analysis of the ATAC ('Arimidex', Tamoxifen Alone or in Combination) trial.. *Breast Cancer Res Treat* 2007; 106(2);229-38.
91. Liberato et al. Cost effectiveness of adjuvant trastuzumab in human epidermal growth factor receptor 2-positive breast cancer.. *J Clin Oncol* 2007; 25(6);625-33.
92. Kurian et al. A cost-effectiveness analysis of adjuvant trastuzumab regimens in early HER2/neu-positive breast cancer.. *J Clin Oncol* 2007; 25(6);634-41.
93. Norman et al. The cost-utility of magnetic resonance imaging for breast cancer in BRCA1 mutation carriers aged 30-49.. *Eur J Health Econ* 2007; 8(2);137-44.
94. Norum et al. Trastuzumab in adjuvant breast cancer therapy. A model based cost-effectiveness analysis.. *Acta Oncol* 2007; 46(2);153-64.
95. Millar et al. Cost effectiveness of trastuzumab in the adjuvant treatment of early breast cancer: a lifetime model.. *Pharmacoeconomics* 2007; 25(5);429-42.
96. Delea et al. Cost-effectiveness of letrozole versus tamoxifen as initial adjuvant therapy in hormone receptor-positive postmenopausal women with early-stage breast cancer.. *Clin Breast Cancer* 2007; 7(8);608-18.
97. Risebrough et al. Cost-effectiveness of switching to exemestane versus continued tamoxifen as adjuvant therapy for postmenopausal women with primary breast cancer.. *Cancer* 2007; 110(3);499-508.
98. Garrison et al. Cost-effectiveness analysis of trastuzumab in the adjuvant setting for treatment of HER2-positive breast cancer.. *Cancer* 2007; 110(3);489-98.
99. Wong et al. Cost effectiveness of mammography screening for Chinese women.. *Cancer* 2007; 110(4);885-95.
100. Mansel et al. Cost-effectiveness analysis of anastrozole vs tamoxifen in adjuvant therapy for early stage breast cancer in the United Kingdom: the 5-year completed treatment analysis of the ATAC ('Arimidex', Tamoxifen alone or in combination) trial.. *Br J Cancer* 2007; 97(2);152-61.
101. Thompson et al. Cost-effectiveness of switching to exemestane after 2 to 3 years of therapy with tamoxifen in postmenopausal women with early-stage breast cancer.. *Value Health* 2007; 10(5);367-76.
102. Younis et al. Adjuvant chemotherapy for breast cancer: a cost-utility analysis of FEC-D vs. FEC 100.. *Breast Cancer Res Treat* 2007; ();.
103. Kondo et al. Economic evaluation of 21-gene reverse transcriptase-polymerase chain reaction assay in lymph-node-negative, estrogen-receptor-positive, early-stage breast cancer in Japan.. *Breast Cancer Res Treat* 2007; ();.

104. Karnon et al. Cost utility analysis of early adjuvant letrozole or anastrozole versus tamoxifen in postmenopausal women with early invasive breast cancer: the UK perspective.. *Eur J Health Econ* 2008; 9(2);171-83.
105. Delea et al. Cost-effectiveness of letrozole versus tamoxifen as initial adjuvant therapy in postmenopausal women with hormone-receptor positive early breast cancer from a Canadian perspective.. *Breast Cancer Res Treat* 2008; 108(3);375-87.
106. Lidgren et al. Cost-effectiveness of HER2 testing and 1-year adjuvant trastuzumab therapy for early breast cancer.. *Ann Oncol* 2008; 19(3);487-95.
107. Tosteson et al. Cost-effectiveness of digital mammography breast cancer screening.. *Ann Intern Med* 2008; 148(1);42014.
108. Wolowacz et al. Docetaxel in combination with doxorubicin and cyclophosphamide as adjuvant treatment for early node-positive breast cancer: a cost-effectiveness and cost-utility analysis.. *J Clin Oncol* 2008; 26(6);925-33.
109. Rojnik et al. Probabilistic cost-effectiveness modeling of different breast cancer screening policies in Slovenia.. *Value Health* 2008; 11(2);139-48.
110. Marino et al. High-dose chemotherapy for patients with high-risk breast cancer: a clinical and economic assessment using a quality-adjusted survival analysis.. *Am J Clin Oncol* 2008; 31(2);117-24.
111. Lee et al. Cost-effectiveness analysis of adjuvant therapy for node positive breast cancer in Korea: docetaxel, doxorubicin and cyclophosphamide (TAC) versus fluorouracil, doxorubicin and cyclophosphamide (FAC).. *Breast Cancer Res Treat* 2008; ();.
112. Au et al. Cost-effectiveness analysis of adjuvant docetaxel, doxorubicin, and cyclophosphamide (TAC) for node-positive breast cancer: modeling the downstream effects.. *Breast Cancer Res Treat* 2008; ();.
113. Lidgren et al. Cost-effectiveness of HER2 testing and trastuzumab therapy for metastatic breast cancer.. *Acta Oncol* 2008; 47(6);1018-28.
114. Holland et al. Cost-Effectiveness of Testing for Breast Cancer Susceptibility Genes.. *Value Health* 2008; ();.
115. Ramsey et al. Cost-Effectiveness of Primary versus Secondary Prophylaxis with Pegfilgrastim in Women with Early-Stage Breast Cancer Receiving Chemotherapy.. *Value Health* 2008; ();.
116. Melnikow et al. Tamoxifen for breast cancer risk reduction: impact of alternative approaches to quality-of-life adjustment on cost-effectiveness analysis.. *Med Care* 2008; 46(9);946-53.
117. Pandharipande et al. Staging MR lymphangiography of the axilla for early breast cancer: cost-effectiveness analysis.. *AJR Am J Roentgenol* 2008; 191(5);1308-19.
118. Sher et al. Partial-Breast Irradiation Versus Whole-Breast Irradiation for Early-Stage Breast Cancer: A Cost-Effectiveness Analysis.. *Int J Radiat Oncol Biol Phys* 2008; ();.
119. Cameron et al. Economic evaluation of fulvestrant as an extra step in the treatment sequence for ER-positive advanced breast cancer.. *Br J Cancer* 2008; 107(3);1984-90.
120. Dranitsaris et al. Economic analysis of albumin-bound paclitaxel for the treatment of metastatic breast cancer.. *J Oncol Pharm Pract* 2008; ();.
121. Thoma et al. A comparison of the superficial inferior epigastric artery flap and deep inferior epigastric perforator flap in postmastectomy reconstruction: A cost-effectiveness analysis.. *Can J Plast Surg* 2008; 16(2);77-84.
122. Le et al. Cost-effectiveness analysis of lapatinib in HER-2-positive advanced breast cancer.. *Cancer* 2009; 115(3);489-98.
123. Lux et al. Cost-utility analysis for advanced breast cancer therapy in Germany: results of the fulvestrant sequencing model.. *Breast Cancer Res Treat* 2009; ();.
124. Moore et al. Cost-effectiveness of MRI compared to mammography for breast cancer screening in a high risk population.. *BMC Health Serv Res* 2009; 9();9.

125. Dedes et al. Bevacizumab in combination with paclitaxel for HER-2 negative metastatic breast cancer: an economic evaluation.. *Eur J Cancer* 2009; 45(8);1397-406.
126. Martín-Jiménez et al. Cost-effectiveness analysis of docetaxel (Taxotere) vs. 5-fluorouracil in combined therapy in the initial phases of breast cancer.. *Clin Transl Oncol* 2009; 11(1);41-7.
127. Taneja et al. Cost effectiveness of breast cancer screening with contrast-enhanced MRI in high-risk women.. *J Am Coll Radiol* 2009; 6(3);171-9.
128. Ahern et al. Cost-effectiveness analysis of mammography and clinical breast examination strategies: a comparison with current guidelines.. *Cancer Epidemiol Biomarkers Prev* 2009; 18(3);718-25.
129. Reis et al. Evaluation of a surveillance programme for women with a family history of breast cancer.. *J Med Genet* 2009; 46(5);319-23.
130. Reed et al. Cost effectiveness of ixabepilone plus capecitabine for metastatic breast cancer progressing after anthracycline and taxane treatment.. *J Clin Oncol* 2009; 27(13);2185-91.
131. Van Vlaenderen et al. Trastuzumab treatment of early stage breast cancer is cost-effective from the perspective of the Belgian health care authorities.. *Acta Clin Belg* 2009; 64(2);100-12.
132. Skedgel et al. The Cost-Utility of Sequential Adjuvant Trastuzumab in Women with Her2/Neu-Positive Breast Cancer: An Analysis Based On Updated Results from the HERA Trial.. *Value Health* 2009; ();.
133. Lyman et al. Cost-effectiveness of pegfilgrastim versus filgrastim primary prophylaxis in women with early-stage breast cancer receiving chemotherapy in the united states.. *Clin Ther* 2009; 31(5);1092-104.
134. Danova et al. Cost-effectiveness of pegfilgrastim versus six days of filgrastim for preventing febrile neutropenia in breast cancer patients.. *Tumori* 2009; 95(2);219-26.
135. Garrison Jr et al. The Economic Value of Innovative Treatments over the Product Life Cycle: The Case of Targeted Trastuzumab Therapy for Breast Cancer.. *Value Health* 2009; ();.
136. Liu et al. The economic value of primary prophylaxis using pegfilgrastim compared with filgrastim in patients with breast cancer in the UK.. *Appl Health Econ Health Policy* 2009; 7(3);193-205.
137. Benedict et al. An economic evaluation of docetaxel and paclitaxel regimens in metastatic breast cancer in the UK.. *Pharmacoeconomics* 2009; 27(10);847-59.
138. Liubao et al. Cost-effectiveness analysis of adjuvant therapy for operable breast cancer from a Chinese perspective: doxorubicin plus cyclophosphamide versus docetaxel plus cyclophosphamide.. *Pharmacoeconomics* 2009; 27(10);873-86.
139. Madan et al. A Rapid-Response Economic Evaluation of the UK NHS Cancer Reform Strategy Breast Cancer Screening Program Extension via a Plausible Bounds Approach.. *Value Health* 2009; ();.
140. Cosler et al. Economic analysis of gene expression profile data to guide adjuvant treatment in women with early-stage breast cancer.. *Cancer Invest* 2009; 27(10);953-9.
141. Logman et al. Economic evaluation of zoledronic acid for the prevention of osteoporotic fractures in postmenopausal women with early-stage breast cancer receiving aromatase inhibitors in the UK.. *Ann Oncol* 2009; ();.
142. Marino et al. Cost-effectiveness of adjuvant docetaxel for node-positive breast cancer patients: results of the PACS 01 economic study.. *Ann Oncol* 2009; ();.
143. Chen et al. An economic evaluation of adjuvant trastuzumab therapy in HER2-positive early breast cancer.. *Value Health* 2009; 12 Suppl 3();S82-4.
144. Essers et al. Transferability of Model-Based Economic Evaluations: The Case of Trastuzumab for the Adjuvant Treatment of HER2-Positive Early Breast Cancer in the Netherlands.. *Value Health* 2010; ();.
145. Lee et al. Cost-effectiveness of breast MR imaging and screen-film mammography for screening



- BRCA1 gene mutation carriers.. *Radiology* 2010; 254(3);793-800.
146. Mittmann et al. Cost effectiveness of tac versus fac in adjuvant treatment of node-positive breast cancer.. *Curr Oncol* 2010; 17(1);42201.
147. Author et al. Economic evaluation of intensive chemotherapy with prophylactic granulocyte colony-stimulating factor for patients with high-risk early breast cancer in Japan.. *Clin Ther* 2010; 32(2);311-26.
148. Retel et al. Cost-effectiveness of the 70-gene signature versus Sankt Gallen guidelines and Adjuvant Online for early breast cancer.. *Eur J Cancer* 2010; ();.
149. Blank et al. Human epidermal growth factor receptor 2 expression in early breast cancer patients: a Swiss cost-effectiveness analysis of different predictive assay strategies.. *Breast Cancer Res Treat* 2010; ();.
150. Baeten et al. Incorporating Equity-Efficiency Interactions in Cost-Effectiveness Analysis-Three Approaches Applied to Breast Cancer Control.. *Value Health* 2010; ();.
151. Lux et al. Cost-effectiveness analysis of anastrozole versus tamoxifen in adjuvant therapy for early-stage breast cancer - a health-economic analysis based on the 100-month analysis of the ATAC trial and the German health system.. *Onkologie* 2010; 33(4);155-66.
152. de Kok et al. Cost-effectiveness of a short stay admission programme for breast cancer surgery.. *Acta Oncol* 2010; 49(3);338-46.
153. Klang et al. Economic Implications of 21-Gene Breast Cancer Risk Assay from the Perspective of an Israeli-Managed Health-Care Organization.. *Value Health* 2010; ();.
154. Tsoi et al. Cost-effectiveness analysis of recurrence score-guided treatment using a 21-gene assay in early breast cancer.. *Oncologist* 2010; 15(5);457-65.
155. Matter-Walstra et al. Trastuzumab beyond progression: a cost-utility analysis.. *Ann Oncol* 2010; ();.
156. Grann et al. Comparative effectiveness of screening and prevention strategies among BRCA1/2-affected mutation carriers.. *Breast Cancer Res Treat* 2010; ();.
157. Ivergård et al. Identifying cost-effective treatment with raloxifene in postmenopausal women using risk algorithms for fractures and invasive breast cancer.. *Bone* 2010; ();.
158. Delea et al. Cost-effectiveness of zoledronic acid plus endocrine therapy in premenopausal women with hormone-responsive early breast cancer.. *Clin Breast Cancer* 2010; 10(4);267-74.
159. Lipsitz et al. Cost effectiveness of letrozole versus anastrozole in postmenopausal women with HR+ early-stage breast cancer.. *Curr Med Res Opin* 2010; 26(10);2315-28.
160. Kwon et al. Expanding the criteria for BRCA mutation testing in breast cancer survivors.. *J Clin Oncol* 2010; 28(27);4214-20.
161. Haines et al. Multimodal exercise improves quality of life of women being treated for breast cancer, but at what cost? Randomized trial with economic evaluation.. *Breast Cancer Res Treat* 2010; 124(1);163-75.
162. Chang et al. Decision modelling of economic evaluation of intervention programme of breast cancer.. *J Eval Clin Pract* 2010; 16(6);1282-8.
163. Frías et al. Cost-effectiveness analyses of docetaxel versus paclitaxel once weekly in patients with metastatic breast cancer in progression following anthracycline chemotherapy, in Spain.. *Clin Transl Oncol* 2010; 12(10);692-700.
164. Kondo et al. Economic evaluation of the 21-gene signature (Oncotype DX®) in lymph node-negative/positive, hormone receptor-positive early-stage breast cancer based on Japanese validation study (JBCRG-TR03).. *Breast Cancer Res Treat* 2010; ();.
165. Meng et al. Cost-effectiveness of MRI and PET imaging for the evaluation of axillary lymph node metastases in early stage breast cancer.. *Eur J Surg Oncol* 2011; 37(1);40-6.
166. B's et al. Cost-effectiveness analysis of a low-fat diet in the prevention of breast and ovarian

- cancer.. *J Am Diet Assoc* 2011; 111(1);56-66.
167. Kimman et al. Economic evaluation of four follow-up strategies after curative treatment for breast cancer: Results of an RCT.. *Eur J Cancer* 2011; ();.
168. Purmonen et al. Short-course adjuvant trastuzumab therapy in early stage breast cancer in Finland: Cost-effectiveness and value of information analysis based on the 5-year follow-up results of the FinHer Trial.. *Acta Oncol* 2011; 50(3);344-52.
169. Noah-Vanhoucke et al. Cost-effectiveness of chemoprevention of breast cancer using tamoxifen in a postmenopausal US population.. *Cancer* 2011; ();.
170. Hall et al. Updated cost-effectiveness analysis of trastuzumab for early breast cancer: a UK perspective considering duration of benefit, long-term toxicity and pattern of recurrence.. *Pharmacoeconomics* 2011; 29(5);415-32.
171. Bernard et al. A Canadian economic analysis of U.S. Oncology Adjuvant Trial 9735.. *Curr Oncol* 2011; 18(2);67-75.
172. Carles et al. Cost-effectiveness of early detection of breast cancer in Catalonia (Spain).. *BMC Cancer* 2011; 11();192.
173. Whyte et al. Cost-effectiveness of granulocyte colony-stimulating factor prophylaxis for febrile neutropenia in breast cancer in the United Kingdom.. *Value Health* 2011; 14(4);465-74.
174. Zendejas et al. Cost-Effectiveness of Contralateral Prophylactic Mastectomy Versus Routine Surveillance in Patients With Unilateral Breast Cancer.. *J Clin Oncol* 2011; ();.
175. Delea et al. Cost-effectiveness of lapatinib plus capecitabine in women with HER2+ metastatic breast cancer who have received prior therapy with trastuzumab.. *Eur J Health Econ* 2011; ();.
176. Schousboe et al. Personalizing mammography by breast density and other risk factors for breast cancer: analysis of health benefits and cost-effectiveness.. *Ann Intern Med* 2011; 155();42297.
177. Campbell et al. The cost-effectiveness of adjuvant chemotherapy for early breast cancer: A comparison of no chemotherapy and first, second, and third generation regimens for patients with differing prognoses.. *Eur J Cancer* 2011; 47();2517-30.
178. Vanderlaan et al. Cost-effectiveness of 21-gene assay in node-positive, early-stage breast cancer.. *Am J Manag Care* 2011; 17(7);455-64.
179. Younis et al. The cost-utility of adjuvant chemotherapy using docetaxel and cyclophosphamide compared with doxorubicin and cyclophosphamide in breast cancer.. *Curr Oncol* 2011; 18();e288-96.
180. Montero et al. A cost-benefit analysis of bevacizumab in combination with paclitaxel in the first-line treatment of patients with metastatic breast cancer.. *Breast Cancer Res Treat* 2011; ();.
181. Lux et al. Cost-Benefit Analysis of Endocrine Therapy in the Adjuvant Setting for Postmenopausal Patients with Hormone Receptor-Positive Breast Cancer, Based on Survival Data and Future Prices for Generic Drugs in the Context of the German Health Care System.. *Breast Care (Basel)* 2011; 6(5);381-389.
182. Ret?l et al. Head-to-head comparison of the 70-gene signature versus the 21-gene assay: cost-effectiveness and the effect of compliance.. *Breast Cancer Res Treat* 2012; ();.
183. Hall et al. Economic evaluation of genomic test-directed chemotherapy for early-stage lymph node-positive breast cancer.. *J Natl Cancer Inst* 2012; 104();56-66.
184. Cheng et al. Cost-utility analysis of adjuvant goserelin (Zoladex) and adjuvant chemotherapy in premenopausal women with breast cancer.. *BMC Cancer* 2012; 12();33.
185. Hedden et al. Assessing the real-world cost-effectiveness of adjuvant trastuzumab in HER-2/neu positive breast cancer.. *Oncologist* 2012; 17();164-71.
186. Kondo et al. Economic evaluation of the 70-gene prognosis-signature (MammaPrint(?)) in hormone receptor-positive, lymph node-negative, human epidermal growth factor receptor type 2-negative early stage breast cancer in Japan.. *Breast Cancer Res Treat* 2012; 133(2);.
187. Wu et al. Costs of trastuzumab in combination with chemotherapy for HER2-positive advanced

- gastric or gastroesophageal junction cancer: an economic evaluation in the Chinese context.. *Clin Ther* 2012; 34(4);468-79.
188. Yang et al. Cost effectiveness of gene expression profiling for early stage breast cancer: A decision-analytic model.. *Cancer* 2012; 118(20);
189. Wong et al. Optimizing resource allocation for breast cancer prevention and care among Hong Kong Chinese women.. *Cancer* 2012; 118(18);
190. Lamond et al. Cost-utility of the 21-gene recurrence score assay in node-negative and node-positive breast cancer.. *Breast Cancer Res Treat* 2012; 133(3);
191. Ito et al. Cost effectiveness of fracture prevention in postmenopausal women who receive aromatase inhibitors for early breast cancer.. *J Clin Oncol* 2012; 30(13);1468-75.
192. Verry et al. Effectiveness and cost-effectiveness of sentinel lymph node biopsy compared with axillary node dissection in patients with early-stage breast cancer: a decision model analysis.. *Br J Cancer* 2012; 106(10);1045-52.
193. Snedecor et al. Cost-effectiveness of denosumab versus zoledronic Acid in the management of skeletal metastases secondary to breast cancer.. *Clin Ther* 2012; 34(6);1334-49.
194. Reed et al. Cost-effectiveness of the 21-gene recurrence score assay in the context of multifactorial decision making to guide chemotherapy for early-stage breast cancer.. *Genet Med* 2012; (1);
195. Gold et al. Cost effectiveness of new breast cancer radiotherapy technologies in diverse populations.. *Breast Cancer Res Treat* 2012; 136(1);221-9.
196. Doss et al. Lapatinib or trastuzumab in combination with an aromatase inhibitor for first-line treatment of metastatic hormone-receptor-positive breast cancer that overexpresses HER2.. *Lancet Oncol* 2012; 13(8);766-7.
197. Hannouf et al. Cost-effectiveness of a 21-gene recurrence score assay versus Canadian clinical practice in women with early-stage estrogen- or progesterone-receptor-positive, axillary lymph-node negative breast cancer.. *BMC Cancer* 2012; 12(1);447.
198. Bai et al. Economic evaluation of radiotherapy for early breast cancer after breast-conserving surgery in a health resource-limited setting.. *Breast Cancer Res Treat* 2012; 136(2);547-57.
199. Blohmer et al. Using the 21-gene assay to guide adjuvant chemotherapy decision-making in early-stage breast cancer: a cost-effectiveness evaluation in the German setting.. *J Med Econ* 2013; 16(1);30-40.
200. Lopes et al. A cost effectiveness study of eribulin versus standard single-agent cytotoxic chemotherapy for women with previously treated metastatic breast cancer.. *Breast Cancer Res Treat* 2013; 137(1);187-93.
201. Cott Chubiz et al. Cost-effectiveness of alternating magnetic resonance imaging and digital mammography screening in BRCA1 and BRCA2 gene mutation carriers.. *Cancer* 2013; 119(6);
202. Shah et al. Cost-efficacy of acceleration partial-breast irradiation compared with whole-breast irradiation.. *Breast Cancer Res Treat* 2013; 138(1);127-35.
203. Refaat et al. Markov Model and Cost-Effectiveness Analysis of Bevacizumab in HER2-Negative Metastatic Breast Cancer.. *Am J Clin Oncol* 2013; (1);
204. Das et al. Economic evaluation of fulvestrant 500 mg versus generic nonsteroidal aromatase inhibitors in patients with advanced breast cancer in the United Kingdom.. *Clin Ther* 2013; 35(3);246-260.e5.
205. Alba et al. Cost-utility analysis of nanoparticle albumin-bound paclitaxel versus paclitaxel in monotherapy in pretreated metastatic breast cancer in Spain.. *Expert Rev Pharmacoecon Outcomes Res* 2013; 13(3);381-91.
206. Lazzaro et al. An Italian cost-effectiveness analysis of paclitaxel albumin (nab-paclitaxel) versus conventional paclitaxel for metastatic breast cancer patients: the COSTANza study.. *Clinicoecon*

Outcomes Res 2013; 5();125-35.

207. Davidson et al. A prospective clinical utility and pharmacoeconomic study of the impact of the 21-gene Recurrence Score? assay in oestrogen receptor positive node negative breast cancer.. Eur J Cancer 2013; ();
208. Krishnan et al. A comparison of acellular dermal matrix to autologous dermal flaps in single-stage, implant-based immediate breast reconstruction: a cost-effectiveness analysis.. Plast Reconstr Surg 2013; 131(5);953-61.
209. Chatterjee et al. A comparison of free autologous breast reconstruction with and without the use of laser-assisted indocyanine green angiography: a cost-effectiveness analysis.. Plast Reconstr Surg 2013; 131(5);693e-701e.
210. Pharoah et al. Cost effectiveness of the NHS breast screening programme: life table model.. BMJ 2013; 346();f2618.
211. Holt et al. A decision impact, decision conflict and economic assessment of routine Oncotype DX testing of 146 women with node-negative or pN1mi, ER-positive breast cancer in the U.K.. Br J Cancer 2013; 108(11);2250-8.
212. Ito et al. Cost-effectiveness of full coverage of aromatase inhibitors for Medicare beneficiaries with early breast cancer.. Cancer 2013; 119(13);2494-502.
213. Garrison et al. Assessing the potential cost-effectiveness of retesting IHC0, IHC1+, or FISH-negative early stage breast cancer patients for HER2 status.. Cancer 2013; ();
214. Alvarado et al. Cost-effectiveness analysis of intraoperative radiation therapy for early-stage breast cancer.. Ann Surg Oncol 2013; 20(9);2873-80.
215. Pataky et al. Cost-effectiveness of MRI for breast cancer screening in BRCA1/2 mutation carriers.. BMC Cancer 2013; 13();339.
216. Paulden et al. Cost-effectiveness of the 21-gene assay for guiding adjuvant chemotherapy decisions in early breast cancer.. Value Health 2013; 16(5);729-39.
217. McCowan et al. The value of high adherence to tamoxifen in women with breast cancer: a community-based cohort study.. Br J Cancer 2013; 109(5);1172-80.
218. Humphreys et al. Cost-effectiveness of an aprepitant regimen for prevention of chemotherapy-induced nausea and vomiting in patients with breast cancer in the UK.. Cancer Manag Res 2013; 5();215-24.
219. Souza et al. Is Age-targeted full-field digital mammography screening cost-effective in emerging countries? A micro simulation model.. Springerplus 2013; 2();366.
220. Retèl et al. Prospective cost-effectiveness analysis of genomic profiling in breast cancer.. Eur J Cancer 2013; 49(18);3773-9.
221. Delea et al. Cost-effectiveness of lapatinib plus letrozole in her2-positive, hormone receptor-positive metastatic breast cancer in Canada.. Curr Oncol 2013; 20(5);e371-87.
222. Grover et al. Comparing five alternative methods of breast reconstruction surgery: a cost-effectiveness analysis.. Plast Reconstr Surg 2013; 132(5);709e-723e.
223. Folse et al. Cost-effectiveness of a genetic test for breast cancer risk.. Cancer Prev Res (Phila) 2013; 6(12);1328-36.
224. Delea et al. Cost-Effectiveness of Lapatinib plus Letrozole in Post-Menopausal Women with Hormone Receptor-and HER2-Positive Metastatic Breast Cancer.. Breast Care (Basel) 2013; 8(6);429-37.
225. Buendía et al. An economic evaluation of trastuzumab as adjuvant treatment of early HER2-positive breast cancer patients in Colombia.. Biomedica 2013; 33(3);411-7.
226. van Ineveld et al. Cost effectiveness of cervical cancer screening among elderly low-income women. Preventing Disease: Beyond the Rhetoric 1990; ();441-46.
227. Goldie et al. Cost effectiveness of human papillomavirus testing to augment cervical cancer

- screening in women infected with the human immunodeficiency virus.. *Am J Med* 2001; 111(2);140-9.
228. Mandelblatt et al. Benefits and costs of using HPV testing to screen for cervical cancer.. *JAMA* 2002; 287(18);2372-81.
229. Kim et al. Cost-effectiveness of alternative triage strategies for atypical squamous cells of undetermined significance.. *JAMA* 2002; 287(18);2382-90.
230. Sanders et al. Cost-effectiveness of a potential vaccine for human papillomavirus.. *Emerg Infect Dis* 2003; 9(1);37-48.
231. Goldie et al. Projected clinical benefits and cost-effectiveness of a human papillomavirus 16/18 vaccine.. *J Natl Cancer Inst* 2004; 96(8);604-15.
232. Kulasingam et al. Adding a quadrivalent human papillomavirus vaccine to the UK cervical cancer screening programme: A cost-effectiveness analysis.. *Cost Eff Resour Alloc* 2008; 6(1);4.
233. Goldhaber-Fiebert et al. Cost-effectiveness of cervical cancer screening with human papillomavirus DNA testing and HPV-16,18 vaccination.. *J Natl Cancer Inst* 2008; 100(5);308-20.
234. Hadwin et al. Modelling the cost-effectiveness and capacity impact of changes to colposcopy referral guidelines for women with mild dyskaryosis in the UK Cervical Screening Programme.. *BJOG* 2008; 115(6);749-57.
235. Dasbach et al. The cost-effectiveness of a quadrivalent human papillomavirus vaccine in Taiwan.. *Asian Pac J Cancer Prev* 2008; 9(3);459-66.
236. Dasbach et al. Assessment of the cost-effectiveness of a quadrivalent HPV vaccine in Norway using a dynamic transmission model.. *Expert Rev Pharmacoecon Outcomes Res* 2008; 8(5);491-500.
237. Coupé et al. HPV16/18 vaccination to prevent cervical cancer in The Netherlands: model-based cost-effectiveness.. *Int J Cancer* 2009; 124(4);970-8.
238. Vijayaraghavan et al. Cost effectiveness of high-risk HPV DNA testing for cervical cancer screening in South Africa.. *Gynecol Oncol* 2009; 112(2);377-83.
239. Annemans et al. Cost-effectiveness evaluation of a quadrivalent human papillomavirus vaccine in Belgium.. *Pharmacoeconomics* 2009; 27(3);231-45.
240. Thiry et al. Cost-effectiveness of human papillomavirus vaccination in Belgium: do not forget about cervical cancer screening.. *Int J Technol Assess Health Care* 2009; 25(2);161-70.
241. Elbasha et al. Age-Based Programs for Vaccination against HPV.. *Value Health* 2009; (1);.
242. Coupé et al. How to screen for cervical cancer after HPV16/18 vaccination in The Netherlands.. *Vaccine* 2009; 27(37);5111-9.
243. Colantonio et al. Cost-effectiveness analysis of a cervical cancer vaccine in five Latin American countries.. *Vaccine* 2009; 27(40);5519-29.
244. TOMBOLA Group et al. Options for managing low grade cervical abnormalities detected at screening: cost effectiveness study.. *BMJ* 2009; 339(1);b2549.
245. Sinanovic et al. The potential cost-effectiveness of adding a human papillomavirus vaccine to the cervical cancer screening programme in South Africa.. *Vaccine* 2009; 27(44);6196-202.
246. Chuck et al. Cost-Effectiveness of 21 Alternative Cervical Cancer Screening Strategies.. *Value Health* 2009; (1);.
247. Kim et al. Cost effectiveness analysis of including boys in a human papillomavirus vaccination programme in the United States.. *BMJ* 2009; 339(1);b3884.
248. Kim et al. Cost-effectiveness of human papillomavirus vaccination and cervical cancer screening in women older than 30 years in the United States.. *Ann Intern Med* 2009; 151(8);538-45.
249. Dee et al. A cost-utility analysis of adding a bivalent or quadrivalent HPV vaccine to the Irish cervical screening programme.. *Eur J Public Health* 2009; (1);.
250. Anonychuk et al. A cost-utility analysis of cervical cancer vaccination in preadolescent Canadian females.. *BMC Public Health* 2009; 9(1);401.

251. Oddsson et al. Cost-effectiveness of human papilloma virus vaccination in Iceland.. *Acta Obstet Gynecol Scand* 2009; 88(12);1411-6.
252. Liu et al. Cost-effectiveness of human papillomavirus vaccination for prevention of cervical cancer in Taiwan.. *BMC Health Serv Res* 2010; 10();11.
253. Dasbach et al. The cost effectiveness of a quadrivalent human papillomavirus vaccine (6/11/16/18) in Hungary.. *J Med Econ* 2010; 13(1);110-8.
254. Berkhof et al. The health and economic effects of HPV DNA screening in The Netherlands.. *Int J Cancer* 2010; ();.
255. Torre et al. The Health Technology Assessment of bivalent HPV vaccine Cervarix in Italy.. *Vaccine* 2010; 28(19);3379-84.
256. Konno et al. Cost-effectiveness analysis of prophylactic cervical cancer vaccination in Japanese women.. *Int J Gynecol Cancer* 2010; 22(7);385-92.
257. Olsen et al. Human papillomavirus transmission and cost-effectiveness of introducing quadrivalent HPV vaccination in Denmark.. *Int J Technol Assess Health Care* 2010; 26(2);183-91.
258. Torvinen et al. Cost effectiveness of prophylactic HPV 16/18 vaccination in Finland: results from a modelling exercise.. *J Med Econ* 2010; 13(2);284-94.
259. Demarteau et al. Modelling the economic value of cross- and sustained-protection in vaccines against cervical cancer.. *J Med Econ* 2010; 13(2);324-38.
260. Balasubramanian et al. Accuracy and cost-effectiveness of cervical cancer screening by high-risk human papillomavirus DNA testing of self-collected vaginal samples.. *J Low Genit Tract Dis* 2010; 14(3);185-95.
261. Ezat et al. Cost-effectiveness of HPV vaccination in the prevention of cervical cancer in Malaysia.. *Asian Pac J Cancer Prev* 2010; 11(1);79-90.
262. Obradovic et al. Cost-effectiveness analysis of HPV vaccination alongside cervical cancer screening programme in Slovenia.. *Eur J Public Health* 2010; 20(4);415-21.
263. Vijayaraghavan et al. Cost-effectiveness of using human papillomavirus 16/18 genotype triage in cervical cancer screening.. *Gynecol Oncol* 2010; ();.
264. Vijayaraghavan et al. Cost-effectiveness of high-risk human papillomavirus testing for cervical cancer screening in Quebec, Canada.. *Can J Public Health* 2010; 101(3);220-5.
265. Melnikow et al. Surveillance after treatment for cervical intraepithelial neoplasia: outcomes, costs, and cost-effectiveness.. *Obstet Gynecol* 2010; 116(5);1158-70.
266. Scoggins et al. Cost effectiveness of a program to promote screening for cervical cancer in the Vietnamese-American population.. *Asian Pac J Cancer Prev* 2010; 11(3);717-22.
267. Chow et al. Cost-effectiveness analysis of human papillomavirus DNA testing and Pap smear for cervical cancer screening in a publicly financed health-care system.. *Br J Cancer* 2010; 103(12);1773-82.
268. Demarteau et al. A generally applicable cost-effectiveness model for the evaluation of vaccines against cervical cancer.. *Int J Public Health* 2010; ();.
269. Ezat et al. Comparative cost-effectiveness of HPV vaccines in the prevention of cervical cancer in Malaysia.. *Asian Pac J Cancer Prev* 2010; 11(4);943-51.
270. Accetta et al. Is human papillomavirus screening preferable to current policies in vaccinated and unvaccinated women? A cost-effectiveness analysis.. *J Med Screen* 2010; 17(4);181-9.
271. Lee et al. Cost-effectiveness of different human papillomavirus vaccines in Singapore.. *BMC Public Health* 2011; 11();203.
272. Praditsitthikorn et al. Economic evaluation of policy options for prevention and control of cervical cancer in Thailand.. *Pharmacoeconomics* 2011; 29();781-806.
273. Coup? et al. Impact of vaccine protection against multiple HPV types on the cost-effectiveness of cervical screening.. *Vaccine* 2012; ();.

274. Vokó et al. Modeling cost-effectiveness of cervical cancer screening in Hungary. *Value Health* 2012; 15(1):39-45.
275. de Kok et al. Primary screening for human papillomavirus compared with cytology screening for cervical cancer in European settings: cost effectiveness analysis based on a Dutch microsimulation model. *BMJ* 2012; 344(7811):e670.
276. de Bekker-Grob et al. Liquid-based cervical cytology using ThinPrep technology: weighing the pros and cons in a cost-effectiveness analysis. *Cancer Causes Control* 2012; 23(8):1323-31.
277. Phippen et al. Cost effectiveness of concurrent gemcitabine and cisplatin with radiation followed by adjuvant gemcitabine and cisplatin in patients with stages IIB to IVA carcinoma of the cervix. *Gynecol Oncol* 2012; 127(2):267-72.
278. Geisler et al. Treatment of advanced or recurrent cervical cancer with Cisplatin or Cisplatin containing regimens: a cost effective analysis. *J Cancer* 2012; 3(1):454-8.
279. Lesnock et al. Upfront treatment of locally advanced cervical cancer with intensity modulated radiation therapy compared to four-field radiation therapy: a cost-effectiveness analysis. *Gynecol Oncol* 2013; 129(3):574-9.
280. Phippen et al. Are supportive care-based treatment strategies preferable to standard chemotherapy in recurrent cervical cancer?. *Gynecol Oncol* 2013; 130(2):317-22.
281. Demarteau et al. Incremental cost-effectiveness evaluation of vaccinating girls against cervical cancer pre- and post-sexual debut in Belgium. *Vaccine* 2013; (1):.
282. Favato et al. A novel method to value real options in health care: the case of a multicohort human papillomavirus vaccination strategy. *Clin Ther* 2013; 35(7):904-14.
283. Uusküla et al. The epidemiological and economic impact of a quadrivalent human papillomavirus (hpv) vaccine in Estonia. *BMC Infect Dis* 2013; 13(1):304.
284. Brisson et al. Comparative cost-effectiveness of the quadrivalent and bivalent human papillomavirus vaccines: A transmission-dynamic modeling study. *Vaccine* 2013; (1):.
285. Fonseca et al. Cost-effectiveness of the vaccine against human papillomavirus in the Brazilian Amazon region. *Rev Assoc Med Bras* 2013; 59(5):442-51.
286. Kievit et al. Utility and cost of carcinoembryonic antigen monitoring in colon cancer follow-up evaluation. A Markov analysis. *Cancer* 1990; 65(11):2580-7.
287. Smith et al. A cost-utility approach to the use of 5-fluorouracil and levamisole as adjuvant chemotherapy for Dukes' C colonic carcinoma. *Med J Aust* 1993; 158(5):319-22.
288. Kievit et al. Detection of recurrence after surgery for colorectal cancer. *Eur J Cancer* 1995; 31A(42193):1222-5.
289. Norum et al. Adjuvant chemotherapy (5-fluorouracil and levamisole) in Dukes' B and C colorectal carcinoma. A cost-effectiveness analysis. *Ann Oncol* 1997; 8(1):65-70.
290. Norum et al. A cost-effectiveness approach to the Norwegian follow-up programme in colorectal cancer. *Ann Oncol* 1997; 8(11):1081-7.
291. Bonistalli et al. Adjuvant chemotherapy in patients with resectable stage III colon cancer: lifetime cost-effectiveness and cost-utility analysis. *Cancer J Sci Am* 1998; 11(1):39-47.
292. Whynes et al. Faecal occult blood screening for colorectal cancer: is it cost-effective?. *Health Econ* 1998; 7(1):21-9.
293. Robert et al. Cost of quality management and information provision for screening: colorectal cancer screening. *J Med Screen* 2000; 7(1):31-4.
294. Ness et al. Cost-utility of one-time colonoscopic screening for colorectal cancer at various ages. *Am J Gastroenterol* 2000; 95(7):1800-11.
295. Miller et al. Quality of life and cost effectiveness analysis of therapy for locally recurrent rectal cancer. *Dis Colon Rectum* 2000; 43(12):1695-1701; discussion 1701-3.
296. Gazelle et al. Cost-effectiveness of hepatic metastasectomy in patients with metastatic

- colorectal carcinoma: a state-transition Monte Carlo decision analysis.. *Ann Surg* 2003; 237(4);544-55.
297. van den Brink et al. Cost-utility analysis of preoperative radiotherapy in patients with rectal cancer undergoing total mesorectal excision: a study of the Dutch Colorectal Cancer Group.. *J Clin Oncol* 2004; 22(2);244-53.
298. Borie et al. Cost-effectiveness of Two Follow-up Strategies for Curative Resection of Colorectal Cancer: Comparative Study Using a Markov Model.. *World J Surg* 2004; ();
299. Hur et al. The cost-effectiveness of aspirin versus cyclooxygenase-2-selective inhibitors for colorectal carcinoma chemoprevention in healthy individuals.. *Cancer* 2004; 101(1);189-97.
300. Borie et al. Cost-effectiveness of two follow-up strategies for curative resection of colorectal cancer: comparative study using a Markov model.. *World J Surg* 2004; 28(6);563-9.
301. Earle et al. Two schedules of second-line irinotecan for metastatic colon carcinoma.. *Cancer* 2004; 101(11);2533-9.
302. Gazelle et al. Metastatic colorectal carcinoma: cost-effectiveness of percutaneous radiofrequency ablation versus that of hepatic resection.. *Radiology* 2004; 233(3);729-39.
303. Uyl-de Groot et al. Immunotherapy with autologous tumor cell-BCG vaccine in patients with colon cancer: a prospective study of medical and economic benefits.. *Vaccine* 2005; 23(17-18);2379-87.
304. Hillner et al. Cost-effectiveness projections of oxaliplatin and infusional fluorouracil versus irinotecan and bolus fluorouracil in first-line therapy for metastatic colorectal carcinoma.. *Cancer* 2005; 104(9);1871-84.
305. Cassidy et al. Pharmacoeconomic analysis of adjuvant oral capecitabine vs intravenous 5-FU/LV in Dukes' C colon cancer: the X-ACT trial.. *Br J Cancer* 2006; 94(8);1122-9.
306. Eggington et al. Cost-effectiveness of oxaliplatin and capecitabine in the adjuvant treatment of stage III colon cancer.. *Br J Cancer* 2006; 95(9);1195-201.
307. Tappenden et al. Option appraisal of population-based colorectal cancer screening programmes in England.. *Gut* 2007; 56(5);677-84.
308. Starling et al. Cost-effectiveness analysis of cetuximab/irinotecan vs active/best supportive care for the treatment of metastatic colorectal cancer patients who have failed previous chemotherapy treatment.. *Br J Cancer* 2007; 96(2);206-12.
309. Aballéa et al. Cost-effectiveness analysis of oxaliplatin compared with 5-fluorouracil/leucovorin in adjuvant treatment of stage III colon cancer in the US.. *Cancer* 2007; 109(6);1082-9.
310. Aballéa et al. An economic evaluation of oxaliplatin for the adjuvant treatment of colon cancer in the United Kingdom (UK).. *Eur J Cancer* 2007; 43(11);1687-93.
311. Nielsen et al. Cost-utility analysis of genetic screening in families of patients with germline MUTYH mutations.. *BMC Med Genet* 2007; 8();42.
312. Hayes et al. Is laparoscopic colectomy for cancer cost-effective relative to open colectomy?. *ANZ J Surg* 2007; 77(9);782-6.
313. Govindarajan et al. Use of colonic stents in emergent malignant left colonic obstruction: a Markov chain Monte Carlo decision analysis.. *Dis Colon Rectum* 2007; 50(11);1811-24.
314. Tappenden et al. The cost-effectiveness of bevacizumab in the first-line treatment of metastatic colorectal cancer in England and Wales.. *Eur J Cancer* 2007; 43(17);2487-94.
315. de Verteuil et al. Economic evaluation of laparoscopic surgery for colorectal cancer.. *Int J Technol Assess Health Care* 2007; 23(4);464-72.
316. Karuna et al. Cost-effectiveness of laparoscopy versus laparotomy for initial surgical evaluation and treatment of potentially resectable hepatic colorectal metastases: a decision analysis.. *J Surg Oncol* 2008; 97(5);396-403.
317. Di Costanzo et al. Capecitabine versus bolus fluorouracil plus leucovorin (folinic acid) as



- adjuvant chemotherapy for patients with Dukes' C colon cancer : economic evaluation in an Italian NHS setting.. *Clin Drug Investig* 2008; 28(10);645-55.
318. Hisashige et al. Cost-effectiveness of adjuvant chemotherapy with uracil-tegafur for curatively resected stage III rectal cancer.. *Br J Cancer* 2008; 99(8);1232-8.
319. Tumeh et al. A Markov model assessing the effectiveness and cost-effectiveness of FOLFOX compared with FOLFIRI for the initial treatment of metastatic colorectal cancer.. *Am J Clin Oncol* 2009; 32(1);49-55.
320. Gold et al. Cost effectiveness of pharmacogenetic testing for uridine diphosphate glucuronosyltransferase 1A1 before irinotecan administration for metastatic colorectal cancer.. *Cancer* 2009; ();.
321. Shirowa et al. Cost-effectiveness analysis of capecitabine compared with bolus 5-fluorouracil/leucovorin for the adjuvant treatment of colon cancer in Japan.. *Pharmacoeconomics* 2009; 27(7);597-608.
322. Mittmann et al. Prospective cost-effectiveness analysis of cetuximab in metastatic colorectal cancer: evaluation of National Cancer Institute of Canada Clinical Trials Group CO.17 trial.. *J Natl Cancer Inst* 2009; 101(17);1182-92.
323. Jeyarajah et al. Prospective evaluation of a Colorectal Cancer Nurse Follow-up Clinic.. *Colorectal Dis* 2009; ();.
324. Mvundura et al. The cost-effectiveness of genetic testing strategies for Lynch syndrome among newly diagnosed patients with colorectal cancer.. *Genet Med* 2010; 9(10);93-104.
325. Attard et al. Cost-effectiveness of oxaliplatin in the adjuvant treatment of colon cancer in Canada.. *Curr Oncol* 2010; 17(1);17-24.
326. Saini et al. Surveillance Colonoscopy is Cost-Effective for Patients with Adenomas who are at High Risk for Colorectal Cancer.. *Gastroenterology* 2010; ();.
327. Howard et al. The value of new chemotherapeutic agents for metastatic colorectal cancer.. *Arch Intern Med* 2010; 170(6);537-42.
328. Lee et al. Cost effectiveness of CT colonography for UK NHS colorectal cancer screening of asymptomatic adults aged 60-69 years.. *Appl Health Econ Health Policy* 2010; 8(3);141-54.
329. Telford et al. The cost-effectiveness of screening for colorectal cancer.. *CMAJ* 2010; ();.
330. Heitman et al. Colorectal cancer screening for average-risk North Americans: an economic evaluation.. *PLoS Med* 2010; 7(11);e1000370.
331. Health Quality Ontario et al. KRAS Testing for Anti-EGFR Therapy in Advanced Colorectal Cancer: An Evidence-Based and Economic Analysis.. *Ont Health Technol Assess Ser* 2010; 10(25);17899.
332. Dranitsaris et al. Improving patient access to cancer drugs in India: Using economic modeling to estimate a more affordable drug cost based on measures of societal value.. *Int J Technol Assess Health Care* 2011; 27(1);23-30.
333. Ercolani et al. Effectiveness and cost-effectiveness of peri-operative versus post-operative chemotherapy for resectable colorectal liver metastases.. *Eur J Cancer* 2011; ();.
334. Blank et al. KRAS and BRAF Mutation Analysis in Metastatic Colorectal Cancer: A Cost-effectiveness Analysis from a Swiss Perspective.. *Clin Cancer Res* 2011; 17();6338-46.
335. Hsu et al. Pharmacoeconomic analysis of capecitabine versus 5-fluorouracil/leucovorin as adjuvant therapy for stage III colon cancer in Taiwan.. *Value Health* 2011; 14();647-51.
336. Squires et al. Cost-effectiveness of aspirin, celecoxib, and calcium chemoprevention for colorectal cancer.. *Clin Ther* 2011; 33();1289-305.
337. De Smedt et al. A cost-effectiveness study of the community-based intervention '10 000 Steps Ghent'. *Public Health Nutr* 2011; ();42014.
338. Maeso et al. Esophageal Doppler monitoring during colorectal resection offers cost-effective

- improvement of hemodynamic control.. *Value Health* 2011; 14();818-26.
339. Mullins et al. Comparative and cost-effectiveness of oxaliplatin-based or irinotecan-based regimens compared with 5-fluorouracil/leucovorin alone among US elderly stage IV colon cancer patients.. *Cancer* 2012; 118(12);.
340. Dan et al. Screening Based on Risk for Colorectal Cancer Is the Most Cost-Effective Approach.. *Clin Gastroenterol Hepatol* 2012; ();.
341. Manca et al. The Cost-Effectiveness of Different Chemotherapy Strategies for Patients with Poor Prognosis Advanced Colorectal Cancer (MRC FOCUS).. *Value Health* 2012; 15();22-31.
342. Hedden et al. Incremental cost-effectiveness of the pre- and post-bevacizumab eras of metastatic colorectal cancer therapy in British Columbia, Canada.. *Eur J Cancer* 2012; 48(13);.
343. Sharp et al. Cost-effectiveness of population-based screening for colorectal cancer: a comparison of guaiac-based faecal occult blood testing, faecal immunochemical testing and flexible sigmoidoscopy.. *Br J Cancer* 2012; 106();805-16.
344. Whyte et al. Re-appraisal of the options for colorectal cancer screening in England.. *Colorectal Dis* 2012; 14(9);.
345. Shiroiwa et al. Cost-effectiveness of adjuvant FOLFOX therapy for stage III colon cancer in Japan based on the MOSAIC trial.. *Value Health* 2012; 15();255-60.
346. Wang et al. Influence of patient preferences on the cost-effectiveness of screening for lynch syndrome.. *Am J Manag Care* 2012; 18(5);e179-85.
347. Wang et al. Influence of patient preferences on the cost-effectiveness of screening for lynch syndrome.. *J Oncol Pract* 2012; 8(5);e24s-30s.
348. Jensen et al. Cost-effectiveness of laparoscopic vs open resection for colon and rectal cancer.. *Dis Colon Rectum* 2012; 55(10);1017-23.
349. Barouni et al. Markov's modeling for screening strategies for colorectal cancer.. *Asian Pac J Cancer Prev* 2012; 13(10);5125-9.
350. Hornberger et al. A Multigene Prognostic Assay for Selection of Adjuvant Chemotherapy in Patients with T3, Stage II Colon Cancer: Impact on Quality-Adjusted Life Expectancy and Costs.. *Value Health* 2012; 15(8);1014-21.
351. Sharaf et al. Comparative Effectiveness and Cost-Effectiveness of Screening Colonoscopy vs. Sigmoidoscopy and Alternative Strategies.. *Am J Gastroenterol* 2013; 108(1);120-32.
352. Ayvaci et al. Cost-effectiveness of adjuvant FOLFOX and 5FU/LV chemotherapy for patients with stage II colon cancer.. *Med Decis Making* 2013; 33(4);521-32.
353. Hoyle et al. Cost-effectiveness of cetuximab, cetuximab plus irinotecan, and panitumumab for third and further lines of treatment for KRAS wild-type patients with metastatic colorectal cancer.. *Value Health* 2013; 16(2);288-96.
354. Dinh et al. Health Benefits and Cost-effectiveness of a Hybrid Screening Strategy for Colorectal Cancer.. *Clin Gastroenterol Hepatol* 2013; ();.
355. Michalopoulos et al. A cost-utility analysis of laparoscopic vs open treatment of colorectal cancer in a public hospital of the Greek National Health System.. *J BUON* 2013; 18();86-97.
356. van Gils et al. Real-World Cost-Effectiveness of Oxaliplatin in Stage III Colon Cancer: A Synthesis of Clinical Trial and Daily Practice Evidence.. *Pharmacoeconomics* 2013; 31(8);703-18.
357. Cronin et al. Cost-effectiveness of an advance notification letter to increase colorectal cancer screening.. *Int J Technol Assess Health Care* 2013; 29(3);261-8.
358. Tappenden et al. Using whole disease modeling to inform resource allocation decisions: economic evaluation of a clinical guideline for colorectal cancer using a single model.. *Value Health* 2013; 16(4);542-53.
359. Ladabaum et al. Colorectal Cancer Screening with Blood-Based Biomarkers: Cost-Effectiveness of Methylated Septin 9 DNA vs. Current Strategies.. *Cancer Epidemiol Biomarkers Prev* 2013; ();.

360. Lawrence et al. Economic analysis of bevacizumab, cetuximab, and panitumumab with fluoropyrimidine-based chemotherapy in the first-line treatment of KRAS wild-type metastatic colorectal cancer (mCRC).. *J Med Econ* 2013; 16(12);1387-98.
361. Nebuloni et al. Modified FLOX as first-line chemotherapy for metastatic colorectal cancer patients in the public health system in Brazil: Effectiveness and cost-utility analysis.. *Mol Clin Oncol* 2013; 1(1);175-179.
362. Provenzale et al. A guide for surveillance of patients with Barrett's esophagus.. *Am J Gastroenterol* 1994; 89(5);670-80.
363. Provenzale et al. Barrett's esophagus: a new look at surveillance based on emerging estimates of cancer risk.. *Am J Gastroenterol* 1999; 94(8);2043-53.
364. Wallace et al. An analysis of multiple staging management strategies for carcinoma of the esophagus: computed tomography, endoscopic ultrasound, positron emission tomography, and thoracoscopy/laparoscopy.. *Ann Thorac Surg* 2002; 74(4);1026-32.
365. Rubenstein et al. The cost-effectiveness of biomarkers for predicting the development of oesophageal adenocarcinoma.. *Aliment Pharmacol Ther* 2005; 22(2);135-46.
366. Rao et al. Economic analysis of esophageal stenting for management of malignant dysphagia.. *Dis Esophagus* 2009; 22(4);337-47.
367. Inadomi et al. A cost-utility analysis of ablative therapy for Barrett's esophagus.. *Gastroenterology* 2009; 136(7);2101-2114.e1-6.
368. Pohl et al. Endoscopic versus surgical therapy for early cancer in Barrett's esophagus: a decision analysis.. *Gastrointest Endosc* 2009; ();.
369. Glimelius et al. Cost-effectiveness of palliative chemotherapy in advanced gastrointestinal cancer.. *Ann Oncol* 1995; 6(3);267-74.
370. Sarasin et al. Living donor liver transplantation for early hepatocellular carcinoma: A life-expectancy and cost-effectiveness perspective.. *Hepatology* 2001; 33(5);1073-9.
371. Arguedas et al. Screening for hepatocellular carcinoma in patients with hepatitis C cirrhosis: a cost-utility analysis.. *Am J Gastroenterol* 2003; 98(3);679-90.
372. Lin et al. Cost-effectiveness of screening for hepatocellular carcinoma in patients with cirrhosis due to chronic hepatitis C.. *Aliment Pharmacol Ther* 2004; 19(11);1159-72.
373. Patel et al. Cost-effectiveness of hepatocellular carcinoma surveillance in patients with hepatitis C virus-related cirrhosis.. *Clin Gastroenterol Hepatol* 2005; 3(1);75-84.
374. Huse et al. Cost effectiveness of imatinib mesylate in the treatment of advanced gastrointestinal stromal tumours.. *Clin Drug Investig* 2007; 27(2);85-93.
375. van Vliet et al. Detection of distant metastases in patients with oesophageal or gastric cardia cancer: a diagnostic decision analysis.. *Br J Cancer* 2007; 97(7);868-76.
376. McKay et al. A cost-utility analysis of treatments for malignant liver tumours: a pilot project.. *HPB (Oxford)* 2007; 9(1);42-51.
377. Nouse et al. Cost-effectiveness of the surveillance program of hepatocellular carcinoma depends on the medical circumstances.. *J Gastroenterol Hepatol* 2008; 23(3);437-44.
378. Xie et al. Cost-effectiveness analysis of Helicobacter pylori screening in prevention of gastric cancer in Chinese.. *Int J Technol Assess Health Care* 2008; 24(1);87-95.
379. Chabot et al. The challenge of conducting pharmacoeconomic evaluations in oncology using crossover trials: the example of sunitinib for gastrointestinal stromal tumour.. *Eur J Cancer* 2008; 44(7);972-7.
380. Thompson Coon et al. Surveillance of cirrhosis for hepatocellular carcinoma: a cost-utility analysis.. *Br J Cancer* 2008; 98(7);1166-75.
381. Xie et al. Cost effectiveness analysis of population-based serology screening and (13)C-Urea breath test for Helicobacter pylori to prevent gastric cancer: a markov model.. *World J Gastroenterol*

2008; 14(19);3021-7.

382. Andersson et al. Cost effectiveness of alternative surveillance strategies for hepatocellular carcinoma in patients with cirrhosis.. *Clin Gastroenterol Hepatol* 2008; 6(12);1418-24.
383. Paz-Ares et al. Cost-effectiveness analysis of sunitinib in patients with metastatic and/or unresectable gastrointestinal stroma tumours (GIST) after progression or intolerance with imatinib.. *Clin Transl Oncol* 2008; 10(12);831-9.
384. Wang et al. A cost-effectiveness analysis of adjuvant chemoradiotherapy for resected gastric cancer.. *Gastrointest Cancer Res* 2008; 2(2);57-63.
385. Robotin et al. Antiviral therapy for hepatitis B-related liver cancer prevention is more cost-effective than cancer screening.. *J Hepatol* 2009; 50(5);990-8.
386. Xie et al. Illustrating economic evaluation of diagnostic technologies: comparing *Helicobacter pylori* screening strategies in prevention of gastric cancer in Canada.. *J Am Coll Radiol* 2009; 6(5);317-23.
387. Greenblatt et al. Cost-effectiveness of prophylactic surgery for duodenal cancer in familial adenomatous polyposis.. *Cancer Epidemiol Biomarkers Prev* 2009; 18(10);2677-84.
388. Vitale et al. Use of sorafenib in patients with hepatocellular carcinoma before liver transplantation: a cost-benefit analysis while awaiting data on sorafenib safety.. *Hepatology* 2010; 51(1);165-73.
389. Shih et al. Cost-effectiveness analysis of a two-stage screening intervention for hepatocellular carcinoma in Taiwan.. *J Formos Med Assoc* 2010; 109(1);39-55.
390. Yeh et al. Cost-effectiveness of endoscopic surveillance of gastric ulcers to improve survival.. *Gastrointest Endosc* 2010; ();.
391. Chabot et al. How Do Cost-Effectiveness Analyses Inform Reimbursement Decisions for Oncology Medicines in Canada? The Example of Sunitinib for First-Line Treatment of Metastatic Renal Cell Carcinoma.. *Value Health* 2010; ();.
392. Yeh et al. Cost-effectiveness of treatment and endoscopic surveillance of precancerous lesions to prevent gastric cancer.. *Cancer* 2010; 116(12);2941-53.
393. Botteman et al. Cost-effectiveness of zoledronic acid in the prevention of skeletal-related events in patients with bone metastases secondary to advanced renal cell carcinoma: application to France, Germany, and the United Kingdom.. *Eur J Health Econ* 2010; ();.
394. Paz-Ares et al. A cost-effectiveness analysis of sunitinib in patients with metastatic renal cell carcinoma intolerant to or experiencing disease progression on immunotherapy: perspective of the Spanish National Health System.. *J Clin Pharm Ther* 2010; 35(4);429-38.
395. Chang et al. Cost-effectiveness analysis of nephron sparing options for the management of small renal masses.. *J Urol* 2011; 185(5);1591-7.
396. Gupta et al. Endoscopy for upper GI cancer screening in the general population: a cost-utility analysis.. *Gastrointest Endosc* 2011; 74();610-624.e2.
397. Shiroiwa et al. Cost-effectiveness analysis of trastuzumab to treat HER2-positive advanced gastric cancer based on the randomised ToGA trial.. *Br J Cancer* 2011; 105();1273-8.
398. Landman et al. Which is more cost-effective under the MELD system: primary liver transplantation, or salvage transplantation after hepatic resection or after loco-regional therapy for hepatocellular carcinoma within Milan criteria?. *HPB (Oxford)* 2011; 13(1);783-91.
399. Zhou et al. Health economic assessment for screening of gastric cancer in a high risk population in northeastern china.. *Chin J Cancer Res* 2011; 23(1);21-4.
400. Hultman et al. Costs and clinical outcome of neoadjuvant systemic chemotherapy followed by cytoreductive surgery and hyperthermic intraperitoneal chemotherapy in peritoneal carcinomatosis from gastric cancer.. *Acta Oncol* 2012; 51();112-21.
401. Liu et al. Comparison of survival and quality of life of hepatectomy and thrombectomy using

- total hepatic vascular exclusion and chemotherapy alone in patients with hepatocellular carcinoma and tumor thrombi in the inferior vena cava and hepatic vein.. *Eur J Gastroenterol Hepatol* 2012; 24();186-94.
402. Tanaka et al. Cost-effectiveness analysis on the surveillance for hepatocellular carcinoma in liver cirrhosis patients using contrast-enhanced ultrasonography.. *Hepatol Res* 2012; ();
403. Cucchetti et al. Cost-effectiveness of semi-annual surveillance for hepatocellular carcinoma in cirrhotic patients of the Italian Liver Cancer population.. *J Hepatol* 2012; 56(5);1089-96.
404. Chang et al. Comparing endoscopy and upper gastrointestinal X-ray for gastric cancer screening in South Korea: a cost-utility analysis.. *Asian Pac J Cancer Prev* 2012; 13(6);2721-8.
405. Sanon et al. Cost-effectiveness of 3-years of adjuvant imatinib in gastrointestinal stromal tumors (GIST) in the United States.. *J Med Econ* 2013; 16(1);150-159.
406. Cammà et al. Cost-effectiveness of sorafenib treatment in field practice for patients with hepatocellular carcinoma.. *Hepatology* 2013; 57(3);1046-54.
407. Cucchetti et al. Cost-effectiveness of hepatic resection versus percutaneous radiofrequency ablation for early hepatocellular carcinoma.. *J Hepatol* 2013; 59(2);300-7.
408. Chongqing et al. Cost-Utility Analysis of the Newly Recommended Adjuvant Chemotherapy for Resectable Gastric Cancer Patients in the 2011 Chinese National Comprehensive Cancer Network (NCCN) Clinical Practice Guidelines in Oncology: Gastric Cancer.. *Pharmacoeconomics* 2013; ();
409. Majer et al. Cost-effectiveness of 3-year vs 1-year adjuvant therapy with imatinib in patients with high risk of gastrointestinal stromal tumour recurrence in the Netherlands; a modelling study alongside the SSGXVIII/AIO trial.. *J Med Econ* 2013; ();
410. Hisashige et al. Cost-effectiveness of adjuvant chemotherapy for curatively resected gastric cancer with S-1.. *BMC Cancer* 2013; 13();443.
411. Tan et al. Economic evaluation of first-line adjuvant chemotherapies for resectable gastric cancer patients in China.. *PLoS One* 2013; 8(12);e83396.
412. Zhou et al. A cost-effectiveness analysis evaluating endoscopic surveillance for gastric cancer for populations with low to intermediate risk.. *PLoS One* 2013; 8(12);e83959.
413. Weeks et al. Cost effectiveness of prophylactic intravenous immune globulin in chronic lymphocytic leukemia.. *N Engl J Med* 1991; 325(2);81-6.
414. Beard et al. The costs and benefits of bone marrow transplantation.. *N Z Med J* 1991; 104(916);303-5.
415. Uyl-de Groot et al. Cost-effectiveness of ABMT in comparison with CHOP chemotherapy in patients with intermediate- and high-grade malignant non-Hodgkin's lymphoma (NHL).. *Bone Marrow Transplant* 1995; 16(3);463-70.
416. Kattan et al. Cost-effectiveness of interferon-alpha and conventional chemotherapy in chronic myelogenous leukemia.. *Ann Intern Med* 1996; 125(7);541-8.
417. Norum et al. Treatment costs in Hodgkin's disease: a cost-utility analysis.. *Eur J Cancer* 1996; 32A(9);1510-7.
418. Hillner et al. Economic analysis of adjuvant interferon alfa-2b in high-risk melanoma based on projections from Eastern Cooperative Oncology Group 1684.. *J Clin Oncol* 1997; 15(6);2351-8.
419. Liberato et al. Cost-effectiveness of interferon alfa in chronic myelogenous leukemia.. *J Clin Oncol* 1997; 15(7);2673-82.
420. Nord et al. Cost-utility analysis of melphalan plus prednisone with or without interferon-alpha 2b in newly diagnosed multiple myeloma. Results from a randomised controlled trial.. *Pharmacoeconomics* 1997; 12(1);89-103.
421. Lee et al. The costs and cost-effectiveness of unrelated donor bone marrow transplantation for chronic phase chronic myelogenous leukemia.. *Blood* 1998; 92(11);4047-52.
422. Beck et al. Cytarabine added to interferon improves the cost-effectiveness of initial therapy for

- patients with early chronic phase chronic myelogenous leukemia.. *Leuk Lymphoma* 2001; 41(42006);117-24.
423. Gulbrandsen et al. Cost-utility analysis of high-dose melphalan with autologous blood stem cell support vs. melphalan plus prednisone in patients younger than 60 years with multiple myeloma.. *Eur J Haematol* 2001; 66(5);328-36.
424. Wirt et al. Cost-Effectiveness of interferon alfa-2b added to chemotherapy for high-tumor-burden follicular non-Hodgkin's lymphoma.. *Leuk Lymphoma* 2001; 40(42130);565-79.
425. Ng et al. Costs and effectiveness of staging and treatment options in early-stage Hodgkin's disease.. *Int J Radiat Oncol Biol Phys* 2001; 50(4);979-89.
426. Gordois et al. Cost-utility analysis of imatinib mesilate for the treatment of advanced stage chronic myeloid leukaemia.. *Br J Cancer* 2003; 89(4);634-40.
427. van Agthoven et al. A cost-utility analysis comparing intensive chemotherapy alone to intensive chemotherapy followed by myeloablative chemotherapy with autologous stem-cell rescue in newly diagnosed patients with stage II/III multiple myeloma; a prospective randomised phase III study.. *Eur J Cancer* 2004; 40(8);1159-69.
428. Reed et al. Cost-effectiveness of imatinib versus interferon-alpha plus low-dose cytarabine for patients with newly diagnosed chronic-phase chronic myeloid leukemia.. *Cancer* 2004; 101(11);2574-83.
429. Warren et al. Cost-utility analysis of imatinib mesylate for the treatment of chronic myelogenous leukemia in the chronic phase.. *Clin Ther* 2004; 26(11);1924-33.
430. Groot et al. Cost-effectiveness of rituximab (MabThera(R)) in diffuse large B-cell lymphoma in the Netherlands.. *Eur J Haematol* 2005; 74(3);194-202.
431. Hornberger et al. Cost utility in the United States of rituximab plus cyclophosphamide, doxorubicin, vincristine, and prednisone for the treatment of elderly patients with diffuse large B-cell lymphoma.. *Cancer* 2005; 103(8);1644-51.
432. Dalziel et al. Cost effectiveness of imatinib compared with interferon-alpha or hydroxycarbamide for first-line treatment of chronic myeloid leukaemia.. *Pharmacoeconomics* 2005; 23(5);515-26.
433. Best et al. Cost-effectiveness analysis of rituximab combined with chop for treatment of diffuse large B-cell lymphoma.. *Value Health* 2005; 8(4);462-70.
434. Guadagnolo et al. Cost-effectiveness analysis of computerized tomography in the routine follow-up of patients after primary treatment for Hodgkin's disease.. *J Clin Oncol* 2006; 24(25);4116-22.
435. Scott et al. Economic evaluation of third-line treatment with alemtuzumab for chronic lymphocytic leukaemia.. *Clin Drug Investig* 2007; 27(11);755-64.
436. Hornberger et al. Economic evaluation of rituximab plus cyclophosphamide, vincristine and prednisolone for advanced follicular lymphoma.. *Leuk Lymphoma* 2008; 49(2);227-36.
437. Reed et al. Updated estimates of survival and cost effectiveness for imatinib versus interferon-alpha plus low-dose cytarabine for newly diagnosed chronic-phase chronic myeloid leukaemia.. *Pharmacoeconomics* 2008; 26(5);435-46.
438. Kasteng et al. Cost-effectiveness of maintenance rituximab treatment after second line therapy in patients with follicular lymphoma in Sweden.. *Acta Oncol* 2008; 47(6);1029-36.
439. Hayslip et al. Cost-effectiveness of extended adjuvant rituximab for US patients aged 65-70 years with follicular lymphoma in second remission.. *Clin Lymphoma Myeloma* 2008; 8(3);166-70.
440. Fagnoni et al. Cost effectiveness of high-dose chemotherapy with autologous stem cell support as initial treatment of aggressive non-Hodgkin's lymphoma.. *Pharmacoeconomics* 2009; 27(1);55-68.
441. Lyman et al. Cost-effectiveness of pegfilgrastim versus 6-day filgrastim primary prophylaxis in patients with non-Hodgkin's lymphoma receiving CHOP-21 in United States.. *Curr Med Res Opin*

2009; 25(2);401-11.

442. Guest et al. Cost-effectiveness of pentostatin compared with cladribine in the management of hairy cell leukemia in the United Kingdom.. *Clin Ther* 2009; 31 Pt 2();2398-415.
443. Chen et al. Cost-effectiveness study comparing imatinib with interferon-alpha for patients with newly diagnosed chronic-phase (CP) chronic myeloid leukemia (CML) from the Chinese public health-care system perspective (CPHSP).. *Value Health* 2009; 12 Suppl 3();S85-8.
444. Deconinck et al. Cost effectiveness of rituximab maintenance therapy in follicular lymphoma: long-term economic evaluation.. *Pharmacoeconomics* 2010; 28(1);35-46.
445. Ray et al. An Evaluation of the Cost-Effectiveness of Rituximab in Combination with Chemotherapy for the First-Line Treatment of Follicular Non-Hodgkin's Lymphoma in the UK.. *Value Health* 2010; ();
446. Johnston et al. Cost-Effectiveness of the Addition of Rituximab to CHOP Chemotherapy in First-Line Treatment for Diffuse Large B-Cell Lymphoma in a Population-Based Observational Cohort in British Columbia, Canada.. *Value Health* 2010; ();
447. Ghatnekar et al. Cost-effectiveness of dasatinib versus high-dose imatinib in patients with Chronic Myeloid Leukemia (CML), resistant to standard dose imatinib--a Swedish model application.. *Acta Oncol* 2010; 49(6);851-8.
448. Tolley et al. Cost effectiveness of deferasirox compared to desferrioxamine in the treatment of iron overload in lower-risk, transfusion-dependent myelodysplastic syndrome patients.. *J Med Econ* 2010; 13(3);559-70.
449. Hornberger et al. The Cost-Effectiveness of Bortezomib in Relapsed/Refractory Multiple Myeloma: Swedish Perspective.. *Eur J Haematol* 2010; ();
450. Rynnänen et al. Treatment of follicular non-Hodgkin's lymphoma with or without rituximab: cost-effectiveness and value of information based on a 5-year follow-up.. *Ann Oncol* 2010; ();
451. Grima et al. Modelled cost-effectiveness of high cut-off haemodialysis compared to standard haemodialysis in the management of myeloma kidney.. *Curr Med Res Opin* 2010; ();
452. Pan et al. Economic analysis of decitabine versus best supportive care in the treatment of intermediate- and high-risk myelodysplastic syndromes from a US payer perspective.. *Clin Ther* 2010; 32(14);2444-56.
453. Møller et al. Cost-effectiveness of novel relapsed-refractory multiple myeloma therapies in Norway: lenalidomide plus dexamethasone vs bortezomib.. *J Med Econ* 2011; 14();690-7.
454. Doss et al. NICE guidance on bortezomib and thalidomide for first-line treatment of multiple myeloma.. *Lancet Oncol* 2011; 12();837-8.
455. Hoyle et al. Cost-effectiveness of dasatinib and nilotinib for imatinib-resistant or -intolerant chronic phase chronic myeloid leukemia.. *Value Health* 2011; 14();1057-67.
456. Hornberger et al. Cost-effectiveness of adding rituximab to fludarabine and cyclophosphamide for the treatment of previously untreated chronic lymphocytic leukemia.. *Leuk Lymphoma* 2012; 53();225-34.
457. Delea et al. Cost-effectiveness of zoledronic acid vs clodronic acid for newly-diagnosed multiple myeloma from the United Kingdom healthcare system perspective.. *J Med Econ* 2012; 15();454-64.
458. Chan et al. Cost-utility analysis of primary prophylaxis versus secondary prophylaxis with granulocyte colony-stimulating factor in elderly patients with diffuse aggressive lymphoma receiving curative-intent chemotherapy.. *J Clin Oncol* 2012; 30();1064-71.
459. Pink et al. Mechanism-based approach to the economic evaluation of pharmaceuticals: pharmacokinetic/pharmacodynamic/pharmacoeconomic analysis of rituximab for follicular lymphoma.. *Pharmacoeconomics* 2012; 30(5);413-29.
460. Kymes et al. Economic evaluation of plerixafor for stem cell mobilization.. *Am J Manag Care* 2012; 18();33-41.

461. Soini et al. Economic evaluation of sequential treatments for follicular non-hodgkin lymphoma.. Clin Ther 2012; 34();915-925.e2.
462. Brown et al. Lenalidomide for multiple myeloma: cost-effectiveness in patients with one prior therapy in England and Wales.. Eur J Health Econ 2012; ();
463. Hornberger et al. Cost-effectiveness of rituximab as maintenance therapy in patients with follicular non-Hodgkin lymphoma after responding to first-line rituximab plus chemotherapy.. Leuk Lymphoma 2012; 53(12);2371-7.
464. Woods et al. Bendamustine versus chlorambucil for the first-line treatment of chronic lymphocytic leukemia in England and Wales: a cost-utility analysis.. Value Health 2012; 15(5);759-70.
465. Lu et al. Cost-effectiveness of alemtuzumab for T-cell prolymphocytic leukemia.. Int J Technol Assess Health Care 2012; 28(3);241-8.
466. Delea et al. Cost-effectiveness of zoledronic acid compared with clodronate in multiple myeloma.. Curr Oncol 2012; 19(6);e392-403.
467. Fragoulakis et al. Economic evaluation of therapies for patients suffering from relapsed-refractory multiple myeloma in Greece.. Cancer Manag Res 2013; 5();37-48.
468. Lathia et al. Cost-Effectiveness of Filgrastim and Pegfilgrastim as Primary Prophylaxis Against Febrile Neutropenia in Lymphoma Patients.. J Natl Cancer Inst 2013; 105(15);1078-1085.
469. Corso et al. Long term evaluation of the impact of autologous peripheral blood stem cell transplantation in multiple myeloma: a cost-effectiveness analysis.. PLoS One 2013; 8(9);e75047.
470. Crespo et al. Cost-effectiveness analysis of azacitidine in the treatment of high-risk myelodysplastic syndromes in Spain.. Health Econ Rev 2013; 3(1);28.
471. Purmonen et al. Economic evaluation of sunitinib malate in second-line treatment of metastatic renal cell carcinoma in Finland.. Clin Ther 2008; 30(2);382-92.
472. Pandharipande et al. Radiofrequency ablation versus nephron-sparing surgery for small unilateral renal cell carcinoma: cost-effectiveness analysis.. Radiology 2008; 248(1);169-78.
473. Remák et al. Economic evaluation of sunitinib malate for the first-line treatment of metastatic renal cell carcinoma.. J Clin Oncol 2008; 26(24);3995-4000.
474. Hoyle et al. Cost-Effectiveness of Temozolomide for First Line Treatment of Advanced Renal Cell Carcinoma.. Value Health 2009; ();
475. Hoyle et al. Cost-Effectiveness of Sorafenib for Second-Line Treatment of Advanced Renal Cell Carcinoma.. Value Health 2009; ();
476. Pandharipande et al. Renal mass biopsy to guide treatment decisions for small incidental renal tumors: a cost-effectiveness analysis.. Radiology 2010; 256(3);836-46.
477. Benedict et al. Economic evaluation of new targeted therapies for the first-line treatment of patients with metastatic renal cell carcinoma.. BJU Int 2011; ();
478. Casciano et al. Economic Evaluation of Everolimus versus Sorafenib for the Treatment of Metastatic Renal Cell Carcinoma after Failure of First-Line Sunitinib.. Value Health 2011; 14();846-51.
479. Heilbrun et al. The cost-effectiveness of immediate treatment, percutaneous biopsy and active surveillance for the diagnosis of the small solid renal mass: evidence from a Markov model.. J Urol 2012; 187();39-43.
480. Calvo Aller et al. Cost-effectiveness evaluation of sunitinib as first-line targeted therapy for metastatic renal cell carcinoma in Spain.. Clin Transl Oncol 2012; 13();869-77.
481. Wu et al. Economic evaluation of first-line treatments for metastatic renal cell carcinoma: a cost-effectiveness analysis in a health resource-limited setting.. PLoS One 2012; 7();e32530.
482. Wong et al. Health benefits and costs of screening for colorectal cancer in people on dialysis or who have received a kidney transplant.. Nephrol Dial Transplant 2013; 28(4);
483. Kilonzo et al. Pazopanib for the first-line treatment of patients with advanced and/or metastatic renal cell carcinoma : a NICE single technology appraisal.. Pharmacoeconomics 2013;



31(1);15-24.

484. Bhan et al. Active Surveillance, Radiofrequency Ablation, or Cryoablation for the Nonsurgical Management of a Small Renal Mass: A Cost-Utility Analysis.. *Ann Surg Oncol* 2013; ();.
485. Mihajlovic et al. Cost-effectiveness of everolimus for second-line treatment of metastatic renal cell carcinoma in Serbia.. *Clin Ther* 2013; 35(12);1909-22.
486. Goodwin et al. Cost-effectiveness of cancer chemotherapy: an economic evaluation of a randomized trial in small-cell lung cancer.. *J Clin Oncol* 1988; 6(10);1537-47.
487. Colice et al. Cost-effectiveness of head CT in patients with lung cancer without clinical evidence of metastases.. *Chest* 1995; 108(5);1264-71.
488. Raab et al. The effect of a patient's risk-taking attitude on the cost effectiveness of testing strategies in the evaluation of pulmonary lesions.. *Chest* 1997; 111(6);1583-90.
489. Berthelot et al. Decision framework for chemotherapeutic interventions for metastatic non-small-cell lung cancer.. *J Natl Cancer Inst* 2000; 92(16);1321-9.
490. Coy et al. The cost-effectiveness and cost-utility of high-dose palliative radiotherapy for advanced non-small-cell lung cancer.. *Int J Radiat Oncol Biol Phys* 2000; 48(4);1025-33.
491. Esnaola et al. Outcomes and cost-effectiveness of alternative staging strategies for non-small-cell lung cancer.. *J Clin Oncol* 2002; 20(1);263-73.
492. Tai et al. Prophylactic cranial irradiation revisited: cost-effectiveness and quality of life in small-cell lung cancer.. *Int J Radiat Oncol Biol Phys* 2002; 52(1);68-74.
493. Mahadevia et al. Lung cancer screening with helical computed tomography in older adult smokers: a decision and cost-effectiveness analysis.. *JAMA* 2003; 289(3);313-22.
494. Gould et al. Cost-effectiveness of alternative management strategies for patients with solitary pulmonary nodules.. *Ann Intern Med* 2003; 138(9);724-35.
495. Ferguson et al. Sleeve lobectomy or pneumonectomy: optimal management strategy using decision analysis techniques.. *Ann Thorac Surg* 2003; 76(6);1782-8.
496. Ferguson et al. Optimal management when unsuspected N2 nodal disease is identified during thoracotomy for lung cancer: cost-effectiveness analysis.. *J Thorac Cardiovasc Surg* 2003; 126(6);1935-42.
497. Manser et al. Cost-effectiveness analysis of screening for lung cancer with low dose spiral CT (computed tomography) in the Australian setting.. *Lung Cancer* 2005; 48(2);171-85.
498. Lievens et al. CHART in lung cancer: economic evaluation and incentives for implementation.. *Radiother Oncol* 2005; 75(2);171-8.
499. Hayashi et al. Should mediastinoscopy actually be incorporated into the FDG PET strategy for patients with non-small cell lung carcinoma?. *Ann Nucl Med* 2005; 19(5);393-8.
500. Kent et al. Cost effectiveness of chest computed tomography after lung cancer resection: a decision analysis model.. *Ann Thorac Surg* 2005; 80(4);1215-22; discussion 1222-3.
501. Dooms et al. Cost-utility analysis of chemotherapy in symptomatic advanced nonsmall cell lung cancer.. *Eur Respir J* 2006; 27(5);895-901.
502. van den Hout et al. Cost-utility analysis of short- versus long-course palliative radiotherapy in patients with non-small-cell lung cancer.. *J Natl Cancer Inst* 2006; 98(24);1786-94.
503. Uyl-de Groot et al. Cost-effectiveness of hypothetical new cancer drugs in patients with advanced small-cell lung cancer: results of a markov chain model.. *Ther Clin Risk Manag* 2006; 2(3);317-23.
504. Cordony et al. Cost-effectiveness of pemetrexed plus cisplatin: malignant pleural mesothelioma treatment in UK clinical practice.. *Value Health* 2008; 11(1);42106.
505. Carlson et al. Comparative clinical and economic outcomes of treatments for refractory non-small cell lung cancer (NSCLC).. *Lung Cancer* 2008; 61(3);405-15.
506. Whyne et al. Could CT screening for lung cancer ever be cost effective in the United Kingdom?.

Cost Eff Resour Alloc 2008; 6();5.

507. Carlson et al. The Potential Clinical and Economic Outcomes of Pharmacogenomic Approaches to EGFR-Tyrosine Kinase Inhibitor Therapy in Non-Small-Cell Lung Cancer.. *Value Health* 2008; ();.
508. Araújo et al. An economic analysis of erlotinib, docetaxel, pemetrexed and best supportive care as second or third line treatment of non-small cell lung cancer.. *Rev Port Pneumol* 2008; 14(6);803-827.
509. Gray et al. Lung cancer deaths from indoor radon and the cost effectiveness and potential of policies to reduce them.. *BMJ* 2009; 338();a3110.
510. Slatore et al. Cost-effectiveness of a smoking cessation program implemented at the time of surgery for lung cancer.. *J Thorac Oncol* 2009; 4(4);499-504.
511. van Loon et al. 18FDG-PET-CT in the follow-up of non-small cell lung cancer patients after radical radiotherapy with or without chemotherapy: an economic evaluation.. *Eur J Cancer* 2010; 46(1);110-9.
512. Asukai et al. Cost-effectiveness analysis of pemetrexed versus docetaxel in the second-line treatment of non-small cell lung cancer in Spain: results for the non-squamous histology population.. *BMC Cancer* 2010; 10();26.
513. Lewis et al. Cost-effectiveness of Erlotinib versus Docetaxel for Second-line Treatment of Advanced Non-small-cell Lung Cancer in the United Kingdom.. *J Int Med Res* 2010; 38(1);42268.
514. Grutters et al. The cost-effectiveness of particle therapy in non-small cell lung cancer: Exploring decision uncertainty and areas for future research.. *Cancer Treat Rev* 2010; ();.
515. Hartwell et al. Topotecan for relapsed small cell lung cancer: A systematic review and economic evaluation.. *Cancer Treat Rev* 2010; ();.
516. Gordon et al. Within a smoking-cessation program, what impact does genetic information on lung cancer need to have to demonstrate cost-effectiveness?. *Cost Eff Resour Alloc* 2010; 8();18.
517. Joerger et al. Addition of cetuximab to first-line chemotherapy in patients with advanced non-small-cell lung cancer: a cost-utility analysis.. *Ann Oncol* 2010; ();.
518. Schreyögg et al. Cost-effectiveness of hybrid PET/CT for staging of non-small cell lung cancer.. *J Nucl Med* 2010; 51(11);1668-75.
519. Vergnenegre et al. Cost-effectiveness of second-line chemotherapy for non-small cell lung cancer: an economic, randomized, prospective, multicenter phase III trial comparing docetaxel and pemetrexed: the GFPC 05-06 study.. *J Thorac Oncol* 2011; 6(1);161-8.
520. Sher et al. Cost-Effectiveness Analysis of Stereotactic Body Radiotherapy and Radiofrequency Ablation for Medically Inoperable, Early-Stage Non-Small Cell Lung Cancer.. *Int J Radiat Oncol Biol Phys* 2011; ();.
521. Taylor et al. Cost Effectiveness of Interventions to Reduce Relapse to Smoking Following Smoking Cessation.. *Addiction* 2011; ();.
522. Tsuchiya et al. Pharmacoeconomic analysis of consolidation therapy with pemetrexed after first-line chemotherapy for non-small cell lung cancer.. *Lung Cancer* 2011; ();.
523. Joshi et al. Cost-effectiveness of zoledronic acid in the management of skeletal metastases in patients with lung cancer in France, Germany, Portugal, the Netherlands, and the United kingdom.. *Clin Ther* 2011; 33(3);291-304.e8.
524. Borget et al. Comparative cost-effectiveness of three strategies for guiding second-line erlotinib initiation in non small-cell lung cancer: a French prospective multicenter study (ERMETIC Project Part 3).. *Eur Respir J* 2011; ();.
525. de Lima Lopes et al. Cost-effectiveness of epidermal growth factor receptor mutation testing and first-line treatment with gefitinib for patients with advanced adenocarcinoma of the lung.. *Cancer* 2011; ();.
526. McMahon et al. Cost-effectiveness of computed tomography screening for lung cancer in the

- United States.. *J Thorac Oncol* 2011; 7(10);1841-8.
527. Goulart et al. A trial-based assessment of the cost-utility of bevacizumab and chemotherapy versus chemotherapy alone for advanced non-small cell lung cancer.. *Value Health* 2011; 14();836-45.
528. Dickson et al. Erlotinib Monotherapy for the Maintenance Treatment of Non-Small Cell Lung Cancer after Previous Platinum-Containing Chemotherapy: A NICE Single Technology Appraisal.. *Pharmacoeconomics* 2011; 29();1051-62.
529. Wu et al. Cost-effectiveness of adding rh-endostatin to first-line chemotherapy in patients with advanced non-small-cell lung cancer in China.. *Clin Ther* 2011; 33();1446-55.
530. Thongprasert et al. Cost-effectiveness analysis of cisplatin plus etoposide and carboplatin plus paclitaxel in a phase III randomized trial for non-small cell lung cancer.. *Asia Pac J Clin Oncol* 2011; 7();369-75.
531. Matter-Walstra et al. Cost-effectiveness of maintenance pemetrexed in patients with advanced nonsquamous-cell lung cancer from the perspective of the swiss health care system.. *Value Health* 2012; 15();65-71.
532. Thongprasert et al. Cost-utility and budget impact analyses of gefitinib in second-line treatment for advanced non-small cell lung cancer from Thai payer perspective.. *Asia Pac J Clin Oncol* 2012; 8();53-61.
533. Atherly et al. The cost-effectiveness of screening lung cancer patients for targeted drug sensitivity markers.. *Br J Cancer* 2012; 106();1100-6.
534. Dillon et al. NICE guidance on erlotinib for first-line treatment of EGFR-TK mutation-positive advanced or metastatic non-small-cell lung cancer.. *Lancet Oncol* 2012; 13(8);764-5.
535. Handorf et al. Cost effectiveness of personalized therapy for first-line treatment of stage IV and recurrent incurable adenocarcinoma of the lung.. *J Oncol Pract* 2012; 8(5);267-74.
536. Zeng et al. Cost-effectiveness of continuation maintenance pemetrexed after cisplatin and pemetrexed chemotherapy for advanced nonsquamous non-small-cell lung cancer: estimates from the perspective of the Chinese health care system.. *Clin Ther* 2013; 35(1);54-65.
537. Zhu et al. Gene-guided gefitinib switch maintenance therapy for patients with advanced EGFR mutation-positive non-small cell lung cancer: an economic analysis.. *BMC Cancer* 2013; 13();39.
538. Shah et al. Cost-effectiveness of stereotactic body radiation therapy versus surgical resection for stage I non-small cell lung cancer.. *Cancer* 2013; ();.
539. Villanti et al. A cost-utility analysis of lung cancer screening and the additional benefits of incorporating smoking cessation interventions.. *PLoS One* 2013; 8(8);e71379.
540. Shmueli et al. Cost-effectiveness of baseline low-dose computed tomography screening for lung cancer: the Israeli experience.. *Value Health* 2013; 16(6);922-31.
541. Akbari Sari et al. The Cost-Utility Analysis of PET-Scan in Diagnosis and Treatment of Non-Small Cell Lung Carcinoma in Iran.. *Iran J Radiol* 2013; 10(2);61-7.
542. Nelson et al. A comparison of individualized treatment guided by VeriStrat with standard of care treatment strategies in patients receiving second-line treatment for advanced non-small cell lung cancer: A cost-utility analysis.. *Lung Cancer* 2013; 82(3);461-8.
543. Ramaekers et al. Cost effectiveness of modified fractionation radiotherapy versus conventional radiotherapy for unresected non-small-cell lung cancer patients.. *J Thorac Oncol* 2013; 8(10);1295-307.
544. Mooney et al. Life-long screening of patients with intermediate-thickness cutaneous melanoma for asymptomatic pulmonary recurrences: a cost-effectiveness analysis.. *Cancer* 1997; 80(6);1052-64.
545. Freedberg et al. Screening for malignant melanoma: A cost-effectiveness analysis.. *J Am Acad Dermatol* 1999; 41(5 Pt 1);738-45.

546. Lafuma et al. Economic analysis of adjuvant therapy with interferon alpha-2a in stage II malignant melanoma.. *Eur J Cancer* 2001; 37(3);369-75.
547. Wilson et al. Modelling the cost-effectiveness of sentinel lymph node mapping and adjuvant interferon treatment for stage II melanoma.. *Melanoma Res* 2002; 12(6);607-17.
548. Crott et al. Cost-utility of adjuvant high-dose interferon alpha therapy in stage III cutaneous melanoma in Quebec.. *Value Health* 2004; 7(4);423-32.
549. Dixon et al. Quality of life and cost-effectiveness of interferon-alpha in malignant melanoma: results from randomised trial.. *Br J Cancer* 2006; 94(4);492-8.
550. Losina et al. Visual screening for malignant melanoma: a cost-effectiveness analysis.. *Arch Dermatol* 2007; 143(1);21-8.
551. Cormier et al. Cost effectiveness of adjuvant interferon in node-positive melanoma.. *J Clin Oncol* 2007; 25(17);2442-8.
552. Morton et al. The Cost-Effectiveness of Sentinel Node Biopsy in Patients with Intermediate Thickness Primary Cutaneous Melanoma.. *Ann Surg Oncol* 2008; ();.
553. Hirst et al. Lifetime cost-effectiveness of skin cancer prevention through promotion of daily sunscreen use.. *Value Health* 2012; 15();261-8.
554. Barzey et al. Ipilimumab in 2nd line treatment of patients with advanced melanoma: a cost-effectiveness analysis.. *J Med Econ* 2013; 16(2);202-12.
555. Wilson et al. The cost-effectiveness of a novel SIAscopic diagnostic aid for the management of pigmented skin lesions in primary care: a decision-analytic model.. *Value Health* 2013; 16(2);356-66.
556. Kansal et al. Cost-effectiveness of a FISH assay for the diagnosis of melanoma in the USA.. *Expert Rev Pharmacoecon Outcomes Res* 2013; 13(3);371-80.
557. Beale et al. Vemurafenib for the treatment of locally advanced or metastatic BRAF V600 mutation-positive malignant melanoma: a NICE single technology appraisal.. *Pharmacoeconomics* 2013; 31(12);1121-9.
558. Hollenbeak et al. The cost-effectiveness of fluorodeoxyglucose 18-F positron emission tomography in the N0 neck.. *Cancer* 2001; 92(9);2341-8.
559. Vidal-Trecan et al. Managing toxic thyroid adenoma: a cost-effectiveness analysis.. *Eur J Endocrinol* 2002; 146(3);283-94.
560. van der Meij et al. Cost-effectiveness of screening for the possible development of cancer in patients with oral lichen planus.. *Community Dent Oral Epidemiol* 2002; 30(5);342-51.
561. Vidal-Trecan et al. Radioiodine or surgery for toxic thyroid adenoma: dissecting an important decision. A cost-effectiveness analysis.. *Thyroid* 2004; 14(11);933-45.
562. Blamey et al. Using recombinant human thyroid-stimulating hormone for the diagnosis of recurrent thyroid cancer.. *ANZ J Surg* 2005; 75(42006);42297.
563. Mernagh et al. Cost-effectiveness of using recombinant human TSH prior to radioiodine ablation for thyroid cancer, compared with treating patients in a hypothyroid state: the German perspective.. *Eur J Endocrinol* 2006; 155(3);405-14.
564. Brown et al. An Economic Evaluation of Cetuximab Combined with Radiotherapy for Patients with Locally Advanced Head and Neck Cancer in Belgium, France, Italy, Switzerland, and the United Kingdom.. *Value Health* 2008; ();.
565. Yen et al. The cost-utility analysis of 18-fluoro-2-deoxyglucose positron emission tomography in the diagnosis of recurrent nasopharyngeal carcinoma.. *Acad Radiol* 2009; 16(1);54-60.
566. Parthan et al. Cost utility of docetaxel as induction chemotherapy followed by chemoradiation in locally advanced squamous cell carcinoma of the head and neck.. *Head Neck* 2009; 31(10);1255-62.
567. Mernagh et al. Cost-Effectiveness of Using Recombinant Human Thyroid-Stimulating Hormone before Radioiodine Ablation for Thyroid Cancer: The Canadian Perspective.. *Value Health* 2009; ();.

568. Sher et al. Cost-effectiveness of CT and PET-CT for determining the need for adjuvant neck dissection in locally advanced head and neck cancer.. *Ann Oncol* 2009; ();.
569. Wang et al. To stimulate or withdraw? A cost-utility analysis of recombinant human thyrotropin versus thyroxine withdrawal for radioiodine ablation in patients with low-risk differentiated thyroid cancer in the United States.. *J Clin Endocrinol Metab* 2010; 95(4);1672-80.
570. Higgins et al. What treatment for early-stage glottic carcinoma among adult patients: CO2 endolaryngeal laser excision versus standard fractionated external beam radiation is superior in terms of cost utility?. *Laryngoscope* 2011; 121(1);116-34.
571. Dedhia et al. The cost-effectiveness of community-based screening for oral cancer in high-risk males in the United States: A Markov decision analysis approach.. *Laryngoscope* 2011; 121(5);952-60.
572. Chan et al. Cost effectiveness of cetuximab concurrent with radiotherapy for patients with locally advanced head and neck cancer in Taiwan: a decision-tree analysis.. *Clin Drug Investig* 2011; 31();717-26.
573. Li et al. Cost-Effectiveness of a Novel Molecular Test for Cytologically Indeterminate Thyroid Nodules.. *J Clin Endocrinol Metab* 2011; ();.
574. Ret?l et al. A cost-effectiveness analysis of a preventive exercise program for patients with advanced head and neck cancer treated with concomitant chemo-radiotherapy.. *BMC Cancer* 2011; 11();475.
575. Liberato et al. Adding docetaxel to cisplatin and fluorouracil in patients with unresectable head and neck cancer: a cost-utility analysis.. *Ann Oncol* 2012; 23(7);.
576. Yong et al. Cost-effectiveness of intensity-modulated radiotherapy in oropharyngeal cancer.. *Clin Oncol (R Coll Radiol)* 2012; 24(7);532-8.
577. Hannouf et al. Cost-effectiveness of adding cetuximab to platinum-based chemotherapy for first-line treatment of recurrent or metastatic head and neck cancer.. *PLoS One* 2012; 7(6);e38557.
578. Heller et al. Cost-effectiveness analysis of repeat fine-needle aspiration for thyroid biopsies read as atypia of undetermined significance.. *Surgery* 2012; 152(3);423-30.
579. Najafzadeh et al. Cost-effectiveness of using a molecular diagnostic test to improve preoperative diagnosis of thyroid cancer.. *Value Health* 2012; 15(8);1005-13.
580. Ramaekers et al. Protons in Head-and-Neck Cancer: Bridging the Gap of?Evidence.. *Int J Radiat Oncol Biol Phys* 2013; 85(5);.
581. Zanoocco et al. Routine on-site evaluation of specimen adequacy during initial ultrasound-guided fine needle aspiration of thyroid nodules: a cost-effectiveness analysis.. *Ann Surg Oncol* 2013; 20(8);2462-7.
582. Govers et al. Management of the N0 neck in early stage oral squamous cell cancer: A modeling study of the cost-effectiveness.. *Oral Oncol* 2013; 49(8);771-7.
583. Zanoocco et al. Cost Effectiveness of Intraoperative Pathology Examination during Diagnostic Hemithyroidectomy for?Unilateral Follicular Thyroid Neoplasms.. *J Am Coll Surg* 2013; ();.
584. Lee et al. Cost-Effectiveness of Minimally Invasive Versus Open Esophagectomy for Esophageal Cancer.. *Ann Surg Oncol* 2013; ();.
585. Kohler et al. Two-year and lifetime cost-effectiveness of intensity modulated radiation therapy versus 3-dimensional conformal radiation therapy for head-and-neck cancer.. *Int J Radiat Oncol Biol Phys* 2013; 87(4);683-9.
586. Zanoocco et al. Routine prophylactic central neck dissection for low-risk papillary thyroid cancer: a cost-effectiveness analysis.. *Surgery* 2013; 154(6);1148-55; discussion 1154-5.
587. Sarasin et al. Management and prevention of thromboembolic events in patients with cancer-related hypercoagulable states: a risky business.. *J Gen Intern Med* 1993; 8(9);476-86.
588. Zbrozek et al. Pharmacoeconomic analysis of ondansetron versus metoclopramide for cisplatin-

- induced nausea and vomiting.. *Am J Hosp Pharm* 1994; 51(12);1555-63.
589. Goldie et al. The costs, clinical benefits, and cost-effectiveness of screening for cervical cancer in HIV-infected women.. *Ann Intern Med* 1999; 130(2);97-107.
590. Goldie et al. The clinical effectiveness and cost-effectiveness of screening for anal squamous intraepithelial lesions in homosexual and bisexual HIV-positive men.. *JAMA* 1999; 281(19);1822-9.
591. Cremieux et al. Cost effectiveness, quality-adjusted life-years and supportive care. Recombinant human erythropoietin as a treatment of cancer-associated anaemia.. *Pharmacoeconomics* 1999; 16(5 Pt 1);459-72.
592. Kievit et al. Diagnosis and treatment of adrenal incidentaloma. A cost-effectiveness analysis.. *Endocrinol Metab Clin North Am* 2000; 29(1);69-90, viii-ix.
593. Goldie et al. Cost-effectiveness of screening for anal squamous intraepithelial lesions and anal cancer in human immunodeficiency virus-negative homosexual and bisexual men.. *Am J Med* 2000; 108(8);634-41.
594. van den Hout et al. Single- versus multiple-fraction radiotherapy in patients with painful bone metastases: cost-utility analysis based on a randomized trial.. *J Natl Cancer Inst* 2003; 95(3);222-9.
595. Hollingworth et al. Rapid magnetic resonance imaging for diagnosing cancer-related low back pain.. *J Gen Intern Med* 2003; 18(4);303-12.
596. Barton et al. Utility-adjusted analysis of the cost of palliative radiotherapy for bone metastases.. *Australas Radiol* 2003; 47(3);274-8.
597. Aujesky et al. Cost-effectiveness of low-molecular-weight heparin for secondary prophylaxis of cancer-related venous thromboembolism.. *Thromb Haemost* 2005; 93(3);592-9.
598. Cho et al. Socioeconomic costs of open surgery and gamma knife radiosurgery for benign cranial base tumors.. *Neurosurgery* 2006; 58(5);866-73; discussion 866-73.
599. Dranitsaris et al. Dalteparin versus warfarin for the prevention of recurrent venous thromboembolic events in cancer patients: a pharmacoeconomic analysis.. *Pharmacoeconomics* 2006; 24(6);593-607.
600. Graves et al. Cost-effectiveness analyses and modelling the lifetime costs and benefits of health-behaviour interventions.. *Chronic Illn* 2006; 2(2);97-107.
601. Lordick et al. Health outcomes and cost-effectiveness of aprepitant in outpatients receiving antiemetic prophylaxis for highly emetogenic chemotherapy in Germany.. *Eur J Cancer* 2007; 43(2);299-307.
602. Moore et al. Cost-effectiveness of aprepitant for the prevention of chemotherapy-induced nausea and vomiting associated with highly emetogenic chemotherapy.. *Value Health* 2007; 10(1);23-31.
603. Annemans et al. Cost-effectiveness analysis of aprepitant in the prevention of chemotherapy-induced nausea and vomiting in Belgium.. *Support Care Cancer* 2007; ();.
604. Annemans et al. Health economic evaluation of controlled and maintained physical exercise in the prevention of cardiovascular and other prosperity diseases.. *Eur J Cardiovasc Prev Rehabil* 2007; 14(6);815-24.
605. Eldar-Lissai et al. Economic analysis of prophylactic pegfilgrastim in adult cancer patients receiving chemotherapy.. *Value Health* 2008; 11(2);172-9.
606. Karnon et al. Cost-utility analysis of screening high-risk groups for anal cancer.. *J Public Health (Oxf)* 2008; 30(3);293-304.
607. Borg et al. The cost-effectiveness of treatment with erythropoietin compared to red blood cell transfusions for patients with chemotherapy induced anaemia: a Markov model.. *Acta Oncol* 2008; 47(6);1009-17.
608. Kanski et al. Economic Analysis of Radiation Therapy Oncology Group 97-14: Multiple Versus Single Fraction Radiation Treatment of Patients With Bone Metastases.. *Am J Clin Oncol* 2009; ();.

609. Chen et al. Cost Effectiveness and Screening Interval of Lipid Screening in Hodgkin's Lymphoma Survivors.. *J Clin Oncol* 2009; ();.
610. Olden et al. Treatment of malignant pleural effusion: PleuRx catheter or talc pleurodesis? A cost-effectiveness analysis.. *J Palliat Med* 2010; 13(1);59-65.
611. Klarenbach et al. Economic evaluation of erythropoiesis-stimulating agents for anemia related to cancer.. *Cancer* 2010; 116(13);3224-32.
612. Soini et al. Trabectedin in the treatment of metastatic soft tissue sarcoma: cost-effectiveness, cost-utility and value of information.. *Ann Oncol* 2010; ();.
613. Dinh et al. Health benefits and cost-effectiveness of primary genetic screening for lynch syndrome in the general population.. *Cancer Prev Res (Phila)* 2011; 4(1);42269.
614. Roth et al. Cost-Effectiveness of Gemcitabine + Cisplatin vs. Gemcitabine Monotherapy in Advanced Biliary Tract Cancer.. *J Gastrointest Cancer* 2011; ();.
615. Vissers et al. An economic evaluation of short-acting opioids for treatment of breakthrough pain in patients with cancer.. *Value Health* 2011; 14(2);274-81.
616. Cunio Machado Fonseca et al. Economic evaluation of clodronate and zoledronate in patients diagnosed with metastatic bone disease from the perspective of public and third party payors in Brazil.. *Clin Ther* 2011; 33();1769-1780.e2.
617. Woods et al. Raltitrexed plus cisplatin is cost-effective compared with pemetrexed plus cisplatin in patients with malignant pleural mesothelioma.. *Lung Cancer* 2012; 75();261-7.
618. Lazenby et al. A Cost-Effectiveness Analysis of Anal Cancer Screening in HIV-Positive Women.. *J Low Genit Tract Dis* 2012; 16(3);.
619. Stopeck et al. Cost-effectiveness of denosumab vs zoledronic acid for prevention of skeletal-related events in patients with solid tumors and bone metastases in the United States.. *J Med Econ* 2012; ();.
620. Furlan et al. The combined use of surgery and radiotherapy to treat patients with epidural cord compression due to metastatic disease: a cost-utility analysis.. *Neuro Oncol* 2012; 14(5);631-40.
621. Puri et al. Treatment of Malignant Pleural Effusion: A Cost-Effectiveness Analysis.. *Ann Thorac Surg* 2012; 94(2);.
622. Pishko et al. Anticoagulation in ambulatory cancer patients with no indication for prophylactic or therapeutic anticoagulation. A cost-effectiveness analysis from a U.S. perspective.. *Thromb Haemost* 2012; 108(2);.
623. Papatheofanis et al. Cost-utility analysis of the cyberknife system for metastatic spinal tumors.. *Neurosurgery* 2009; 64(2 Suppl);A73-83.
624. Athanasakis et al. Cost-effectiveness of varenicline versus bupropion, nicotine-replacement therapy, and unaided cessation in Greece.. *Clin Ther* 2012; 34(8);1803-14.
625. Jones et al. Rehabilitation in Advanced, Progressive, Recurrent Cancer: A Randomized Controlled Trial.. *J Pain Symptom Manage* 2012; ();.
626. Hornberger et al. Cost-effectiveness of gene-expression profiling for tumor-site origin.. *Value Health* 2013; 16();46-56.
627. Assoumou et al. Cost-effectiveness of surveillance strategies after treatment for high-grade anal dysplasia in high-risk patients.. *Sex Transm Dis* 2013; 40(4);298-303.
628. Luttjeboer et al. Cost-effectiveness of the prophylactic HPV vaccine: An application to the Netherlands taking non-cervical cancers and cross-protection into account.. *Vaccine* 2013; ();.
629. Corrie et al. Is community treatment best? a randomised trial comparing delivery of cancer treatment in the hospital, home and GP surgery.. *Br J Cancer* 2013; 109(6);1549-55.
630. Guest et al. Cost effectiveness of first-line treatment with doxorubicin/ifosfamide compared to trabectedin monotherapy in the management of advanced soft tissue sarcoma in Italy, Spain, and sweden.. *Sarcoma* 2013; 2013();725305.

631. Johal et al. Mifamurtide for high-grade, resectable, nonmetastatic osteosarcoma following surgical resection: a cost-effectiveness analysis.. *Value Health* 2013; 16(8);1123-32.
632. Bennett et al. Cost-utility assessment of amifostine as first-line therapy for ovarian cancer.. *Am J Manag Care* 1998; 10(5);64-72.
633. Messori et al. Treatments for newly diagnosed advanced ovarian cancer: analysis of survival data and cost-effectiveness evaluation.. *Anticancer Drugs* 1998; 9(6);491-502.
634. Limat et al. From randomised clinical trials to clinical practice : a pragmatic cost-effectiveness analysis of Paclitaxel in first-line therapy for advanced ovarian cancer.. *Pharmacoeconomics* 2004; 22(17);633-41.
635. Bristow et al. Centralization of care for patients with advanced-stage ovarian cancer: a cost-effectiveness analysis.. *Cancer* 2007; 109(8);1513-22.
636. Bristow et al. Intraperitoneal cisplatin and paclitaxel versus intravenous carboplatin and paclitaxel chemotherapy for Stage III ovarian cancer: a cost-effectiveness analysis.. *Gynecol Oncol* 2007; 106(3);476-81.
637. Kwon et al. Cost-effectiveness analysis of prevention strategies for gynecologic cancers in Lynch syndrome.. *Cancer* 2008; 113(2);326-35.
638. Havrilesky et al. Cost effectiveness of intraperitoneal compared with intravenous chemotherapy for women with optimally resected stage III ovarian cancer: a Gynecologic Oncology Group study.. *J Clin Oncol* 2008; 26(25);4144-50.
639. Greving et al. Is centralization of ovarian cancer care warranted? A cost-effectiveness analysis.. *Gynecol Oncol* 2009; 113(1);68-74.
640. Rubinstein et al. Cost-effectiveness of population-based BRCA1/2 testing and ovarian cancer prevention for Ashkenazi Jews: a call for dialogue.. *Genet Med* 2009; 11(9);629-39.
641. Yang et al. A cost-effectiveness analysis of prophylactic surgery versus gynecologic surveillance for women from hereditary non-polyposis colorectal cancer (HNPCC) Families.. *Fam Cancer* 2011; ();.
642. Havrilesky et al. Cost-effectiveness of combination versus sequential docetaxel and carboplatin for the treatment of platinum-sensitive, recurrent ovarian cancer.. *Cancer* 2011; ();.
643. Lesnock et al. Consolidation paclitaxel is more cost-effective than bevacizumab following upfront treatment of advanced epithelial ovarian cancer.. *Gynecol Oncol* 2011; ();.
644. Uppal et al. Prolonged postoperative venous thrombo-embolism prophylaxis is cost-effective in advanced ovarian cancer patients.. *Gynecol Oncol* 2012; 127(3);631-7.
645. Kwon et al. Prophylactic salpingectomy and delayed oophorectomy as an alternative for BRCA mutation carriers.. *Obstet Gynecol* 2013; 121(1);14-24.
646. Graves et al. The cost-effectiveness of total laparoscopic hysterectomy compared to total abdominal hysterectomy for the treatment of early stage endometrial cancer.. *BMJ Open* 2013; 3(4);.
647. Lowery et al. Cost-effectiveness of early palliative care intervention in recurrent platinum-resistant ovarian cancer.. *Gynecol Oncol* 2013; ();.
648. Fisher et al. Cost-Effectiveness of Trabectedin Plus Pegylated Liposomal Doxorubicin for the Treatment of Women with Relapsed Platinum-Sensitive Ovarian Cancer in the UK: Analysis Based on the Final Survival Data of the OVA-301 Trial.. *Value Health* 2013; 16(4);507-16.
649. Havrilesky et al. How much is another randomized trial of lymph node dissection in endometrial cancer worth? A value of information analysis.. *Gynecol Oncol* 2013; ();.
650. Lee et al. Cost-utility analysis for platinum-sensitive recurrent ovarian cancer therapy in South Korea: results of the polyethylene glycolated liposomal doxorubicin/carboplatin sequencing model.. *Clinicoecon Outcomes Res* 2013; 5();297-307.
651. Barnett et al. Cost effectiveness of alternative strategies for incorporating bevacizumab into the primary treatment of ovarian cancer.. *Cancer* 2013; ();.



652. Arguedas et al. Biliary stents in malignant obstructive jaundice due to pancreatic carcinoma: a cost-effectiveness analysis.. *Am J Gastroenterol* 2002; 97(4);898-904.
653. Krzyzanowska et al. Using economic analysis to evaluate the potential of multimodality therapy for elderly patients with locally advanced pancreatic cancer.. *Int J Radiat Oncol Biol Phys* 2007; 67(1);211-8.
654. Rubenstein et al. A clinical and economic evaluation of endoscopic ultrasound for patients at risk for familial pancreatic adenocarcinoma.. *Pancreatol* 2007; 7(42130);514-25.
655. Huang et al. Consensus Guidelines in the Management of Branch Duct Intraductal Papillary Mucinous Neoplasm: A Cost-Effectiveness Analysis.. *Dig Dis Sci* 2009; ();.
656. Ljungman et al. Cost-Utility Estimation of Surgical Treatment of Pancreatic Carcinoma Aimed at Cure.. *World J Surg* 2010; ();.
657. Murphy et al. Cost-effectiveness of modern radiotherapy techniques in locally advanced pancreatic cancer.. *Cancer* 2011; ();.
658. Casciano et al. Cost-effectiveness of everolimus vs sunitinib in treating patients with advanced, progressive pancreatic neuroendocrine tumors in the United States.. *J Med Econ* 2012; 15Suppl1();55-64.
659. Abbott et al. Cost-effectiveness of Treatment Strategies for Pancreatic Head Adenocarcinoma and Potential Opportunities for Improvement.. *Ann Surg Oncol* 2012; 19(12);3659-67.
660. Abbott et al. The Cost-Effectiveness of Neoadjuvant Chemoradiation is Superior to a Surgery-First Approach in the Treatment of Pancreatic Head Adenocarcinoma.. *Ann Surg Oncol* 2013; ();.
661. Ljungman et al. Cost-utility estimations of palliative care in patients with pancreatic adenocarcinoma: a retrospective analysis.. *World J Surg* 2013; 37(8);1883-91.
662. Tam et al. Cost-effectiveness of systemic therapies for metastatic pancreatic cancer.. *Curr Oncol* 2013; 20(2);e90-e106.
663. Ghatnekar et al. Modelling the benefits of early diagnosis of pancreatic cancer using a biomarker signature.. *Int J Cancer* 2013; ();.
664. Goodnough et al. Efficacy and cost-effectiveness of autologous blood predeposit in patients undergoing radical prostatectomy procedures.. *Urology* 1994; 44(2);226-31.
665. Bennett et al. Cost-effective models for flutamide for prostate carcinoma patients: are they helpful to policy makers?. *Cancer* 1996; 77(9);1854-61.
666. Gottlieb et al. The prostate: decreasing cost-effectiveness of biopsy with advancing age.. *Invest Radiol* 1996; 31(2);84-90.
667. Langlotz et al. Cost-effectiveness of endorectal magnetic resonance imaging for the staging of prostate cancer.. *Acad Radiol* 1996; 3 Suppl 1();S24-7.
668. Bloomfield et al. Economic evaluation of chemotherapy with mitoxantrone plus prednisone for symptomatic hormone-resistant prostate cancer: based on a Canadian randomized trial with palliative end points.. *J Clin Oncol* 1998; 16(6);2272-9.
669. Jager et al. Prostate cancer staging: should MR imaging be used?--A decision analytic approach.. *Radiology* 2000; 215(2);445-51.
670. Bayoumi et al. Cost-effectiveness of androgen suppression therapies in advanced prostate cancer.. *J Natl Cancer Inst* 2000; 92(21);1731-9.
671. Calvert et al. Effectiveness and cost-effectiveness of prognostic markers in prostate cancer.. *Br J Cancer* 2003; 88(1);31-5.
672. Reed et al. Cost-effectiveness of zoledronic acid for the prevention of skeletal complications in patients with prostate cancer.. *J Urol* 2004; 171(4);1537-42.
673. Moeremans et al. Cost-effectiveness analysis of bicalutamide (Casodex) for adjuvant treatment of early prostate cancer.. *Value Health* 2004; 7(4);472-81.
674. Kanski et al. Radiotherapy is a cost-effective palliative treatment for patients with bone

- metastasis from prostate cancer.. *Int J Radiat Oncol Biol Phys* 2004; 60(5);1373-8.
675. Penson et al. The cost-effectiveness of combined androgen blockade with bicalutamide and luteinizing hormone releasing hormone agonist in men with metastatic prostate cancer.. *J Urol* 2005; 174(2);547-52; discussion 552.
676. Zeliadt et al. Lifetime implications and cost-effectiveness of using finasteride to prevent prostate cancer.. *Am J Med* 2005; 118(8);850-7.
677. Konski et al. Economic analysis of a phase III clinical trial evaluating the addition of total androgen suppression to radiation versus radiation alone for locally advanced prostate cancer (Radiation Therapy Oncology Group protocol 86-10).. *Int J Radiat Oncol Biol Phys* 2005; 63(3);788-94.
678. Ramsey et al. Is combined androgen blockade with bicalutamide cost-effective compared with combined androgen blockade with flutamide?. *Urology* 2005; 66(4);835-9.
679. Konski et al. Cost-effectiveness of intensity-modulated radiation therapy.. *Expert Rev Pharmacoecon Outcomes Res* 2005; 5(2);137-40.
680. Konski et al. Long-term hormone therapy and radiation is cost-effective for patients with locally advanced prostate carcinoma.. *Cancer* 2006; 106(1);51-7.
681. Konski et al. Using decision analysis to determine the cost-effectiveness of intensity-modulated radiation therapy in the treatment of intermediate risk prostate cancer.. *Int J Radiat Oncol Biol Phys* 2006; 66(2);408-15.
682. Kobayashi et al. Prostate cancer screening strategies with re-screening interval determined by individual baseline prostate-specific antigen values are cost-effective.. *Eur J Surg Oncol* 2007; 33(6);783-9.
683. Konski et al. Is proton beam therapy cost effective in the treatment of adenocarcinoma of the prostate?. *J Clin Oncol* 2007; 25(24);3603-8.
684. Lazzaro et al. Economic evaluation of different hormonal therapies for prostate cancer. Final results from the Quality of Life Antiandrogen Blockade Italian Observational Study (QuABIOS).. *Arch Ital Urol Androl* 2007; 79(3);104-7.
685. Svatek et al. Cost-effectiveness of prostate cancer chemoprevention: a quality of life-years analysis.. *Cancer* 2008; 112(5);1058-65.
686. Quigley et al. Prostate tumor alignment and continuous, real-time adaptive radiation therapy using electromagnetic fiducials: Clinical and cost-utility analyses.. *Urol Oncol* 2008; ();.
687. Zubek et al. Cost effectiveness of risk-prediction tools in selecting patients for immediate post-prostatectomy treatment.. *Mol Diagn Ther* 2009; 13(1);31-47.
688. Bergman et al. Caring for the Uninsured with Prostate Cancer: A Comparison of Four Policy Alternatives in California.. *J Community Health* 2009; ();.
689. Earnshaw et al. Cost Effectiveness of 5-Alpha Reductase Inhibitors for the Prevention of Prostate Cancer in Multiple Patient Populations.. *Pharmacoeconomics* 2010; ();.
690. Ito et al. Cost-effectiveness of fracture prevention in men who receive androgen deprivation therapy for localized prostate cancer.. *Ann Intern Med* 2010; 152(10);621-9.
691. Svatek et al. Cost Utility of Prostate Cancer Chemoprevention with Dutasteride in Men with an elevated PSA.. *Cancer Prev Res (Phila)* 2010; ();.
692. Reed et al. Effects of family history and genetic polymorphism on the cost-effectiveness of chemoprevention with finasteride for prostate cancer.. *J Urol* 2011; 185(3);841-7.
693. Carter et al. Cost effectiveness of zoledronic acid in the management of skeletal metastases in hormone-refractory prostate cancer patients in France, Germany, Portugal, and the Netherlands.. *J Med Econ* 2011; ();.
694. Hohw? et al. A short-term cost-effectiveness study comparing robot-assisted laparoscopic and open retropubic radical prostatectomy.. *J Med Econ* 2011; 14(4);403-9.
695. Glazener et al. Urinary incontinence in men after formal one-to-one pelvic-floor muscle training

- following radical prostatectomy or transurethral resection of the prostate (MAPS): two parallel randomised controlled trials.. *Lancet* 2011; 378();328-37.
696. Kattan et al. Cost effectiveness of chemoprevention for prostate cancer with dutasteride in a high-risk population based on results from the REDUCE clinical trial.. *Appl Health Econ Health Policy* 2011; 9();305-15.
697. Lu et al. Cost-effectiveness analysis of degarelix for advanced hormone-dependent prostate cancer.. *BJU Int* 2011; ();.
698. Lyth et al. A decision support model for cost-effectiveness of radical prostatectomy in localized prostate cancer.. *Scand J Urol Nephrol* 2012; 46();19-25.
699. Bjerklund Johansen et al. Cost-effectiveness of combination therapy for treatment of benign prostatic hyperplasia: a model based on the findings of the Combination of Avodart and Tamsulosin trial.. *BJU Int* 2012; ();.
700. Nichol et al. Cost-effectiveness of Prostate Health Index for prostate cancer detection.. *BJU Int* 2012; 110(3);.
701. Hodges et al. Cost-effectiveness analysis of SBRT versus IMRT: an emerging initial radiation treatment option for organ-confined prostate cancer.. *Am J Manag Care* 2012; 18(5);e186-93.
702. Stewart et al. Does variation in either age at start of therapy or duration of therapy make chemoprevention with finasteride cost-effective?. *Prostate Cancer Prostatic Dis* 2012; 15(4);380-5.
703. Parthan et al. Comparative cost-effectiveness of stereotactic body radiation therapy versus intensity-modulated and proton radiation therapy for localized prostate cancer.. *Front Oncol* 2012; 2();81.
704. Hodges et al. Cost-effectiveness analysis of stereotactic body radiation therapy versus intensity-modulated radiation therapy: an emerging initial radiation treatment option for organ-confined prostate cancer.. *J Oncol Pract* 2012; 8(3Suppl);e31s-7s.
705. Pfeifer et al. Development of a decision-analytic model for the application of STR-based provenance testing of transrectal prostate biopsy specimens.. *Value Health* 2012; 15(6);860-7.
706. Dyer et al. NICE guidance on abiraterone for castration-resistant metastatic prostate cancer previously treated with a docetaxel-containing regimen.. *Lancet Oncol* 2012; 13(8);762-3.
707. Hummel et al. A model of the cost-effectiveness of intensity-modulated radiotherapy in comparison with three-dimensional conformal radiotherapy for the treatment of localised prostate cancer.. *Clin Oncol (R Coll Radiol)* 2012; 24(10);e159-67.
708. Sher et al. Cost-effectiveness Analysis of SBRT Versus IMRT for Low-risk Prostate Cancer.. *Am J Clin Oncol* 2012; ();.
709. Snedecor et al. Denosumab versus zoledronic acid for treatment of bone metastases in men with castration-resistant prostate cancer: A cost-effectiveness analysis.. *J Med Econ* 2013; 16(1);19-29.
710. Cooperberg et al. Primary treatments for clinically localised prostate cancer: a comprehensive lifetime cost-utility analysis.. *BJU Int* 2013; 111(3);.
711. Walker et al. Cost-effectiveness of single-dose tamsulosin and dutasteride combination therapy compared with tamsulosin monotherapy in patients with benign prostatic hyperplasia in the UK.. *BJU Int* 2013; 112(5);638-46.
712. Close et al. Comparative Cost-effectiveness of Robot-assisted and Standard Laparoscopic Prostatectomy as Alternatives to Open Radical Prostatectomy for Treatment of Men with Localised Prostate Cancer: A Health Technology Assessment from the Perspective of the UK National Health Service.. *Eur Urol* 2013; 64(3);361-9.
713. Hatoum et al. Cost-effectiveness analysis comparing degarelix with leuprolide in hormonal therapy for patients with locally advanced prostate cancer.. *Expert Rev Pharmacoecon Outcomes Res* 2013; 13(2);261-70.

714. Zhong et al. Therapeutic options in docetaxel-refractory metastatic castration-resistant prostate cancer: a cost-effectiveness analysis.. *PLoS One* 2013; 8(5);e64275.
715. Martin et al. Risk assessment to guide prostate cancer screening decisions: a cost-effectiveness analysis.. *Med J Aust* 2013; 198(10);546-50.
716. Hayes et al. Observation versus initial treatment for men with localized, low-risk prostate cancer: a cost-effectiveness analysis.. *Ann Intern Med* 2013; 158(12);853-60.
717. Ismaila et al. Cost-effectiveness of dutasteride-tamsulosin combination therapy for the treatment of symptomatic benign prostatic hyperplasia: A Canadian model based on the CombAT trial.. *Can Urol Assoc J* 2013; 7();E393-401.
718. Wilson et al. New therapeutic options in metastatic castration-resistant prostate cancer: Can cost-effectiveness analysis help in treatment decisions?. *J Oncol Pharm Pract* 2013; ();.
719. de Rooij et al. Cost-effectiveness of Magnetic Resonance (MR) Imaging and MR-guided Targeted Biopsy Versus Systematic Transrectal Ultrasound-Guided Biopsy in Diagnosing Prostate Cancer: A Modelling Study from a Health Care Perspective.. *Eur Urol* 2013; ();.
720. Dan et al. Endoscopic screening for gastric cancer.. *Clin Gastroenterol Hepatol* 2006; 4(6);709-16.
721. Kwon et al. Cost-effectiveness analysis of treatment strategies for Stage I and II endometrial cancer.. *J Obstet Gynaecol Can* 2007; 29(2);131-9.
